# Supplementary material
Source: Research Square preprint supplement (doi:10.21203/rs.3.rs-9151067/v1)
Supplement: Supplementary file 1 [file 2e94f21607a3786da37dc853.xlsx]

## Sheet: Up_Downregulated_proteins
logFC	AveExpr	t	P.Value	adj.P.Val	B	protein	regulation
-6.41099	14.4383	-20.5973	7.97679596184649e-22	1.25036276701944e-18	39.554	LCN2	Down
-5.25825	16.9638	-16.8826	6.14427217291529e-19	2.75175618029849e-16	33.0798	ANXA1	Down
-4.78744	12.2868	-11.7264	5.26594179164241e-14	5.15897734899967e-12	21.8297	MLPH	Down
-4.50497	12.1619	-12.765	4.2088845638153e-15	6.42240469239624e-13	24.3461	ERN2	Down
-4.35837	13.8344	-12.6488	5.54664477046744e-15	7.8907182443017e-13	24.0715	TSPAN1	Down
-4.21831	12.3609	-12.3114	1.24826654624446e-14	1.56532624899055e-12	23.2641	DCBLD2	Down
-3.80455	13.409	-8.73294	1.65260965664665e-10	5.93946338221859e-09	13.7869	ALDH1A3	Down
-3.75279	12.5975	-19.1014	1.02016463303844e-20	1.06607204152517e-17	37.0844	INPP4B	Down
-3.67464	13.496	-8.09326	1.06976335949052e-09	2.85421968681088e-08	11.9202	PADI1	Down
-3.65234	12.6031	-11.894	3.47129657914917e-14	3.68898805953649e-12	22.2451	KLK6	Down
-3.56114	12.6072	-8.40681	4.25683979698529e-10	1.30197002571209e-08	12.8411	IL18	Down
-3.55719	13.1196	-7.45661	7.1818167597072e-09	1.48613831958298e-07	10.0186	ARHGDIB	Down
-3.5194	12.8195	-14.4165	9.83396239143182e-17	2.56912267476156e-14	28.0747	SLC44A4	Down
-3.46504	12.5676	-5.26349	6.28497904177266e-06	4.77658407174722e-05	3.28785	HSPB1	Down
-3.45689	12.2282	-4.75958	2.97610946653813e-05	0.000175874	1.75814	KRT17	Down
-3.44549	12.3404	-9.23216	3.98282957843588e-11	1.72223044529607e-09	15.2095	PLEKHS1	Down
-3.4273	13.5183	-5.82258	1.1036371260938e-06	1.09664101118988e-05	5.00807	KRT6A	Down
-3.40601	13.9898	-7.44532	7.43112049468149e-09	1.51276381498873e-07	9.98455	CD44	Down
-3.40555	11.8254	-7.55502	5.33609579633526e-09	1.15323865201309e-07	10.3151	PTGES	Down
-3.38383	11.6524	-3.01365	0.00464719	0.0125697	-3.10824	KRT7	Down
-3.32636	13.1492	-8.59977	2.42825726854689e-10	8.31976670698851e-09	13.4022	KRT80	Down
-3.32438	14.7436	-3.15608	0.00317984	0.0091206	-2.75174	RAB33B	Down
-3.31414	11.547	-4.22177	0.000151687	0.00070242	0.167527	REN	Down
-3.28345	12.1469	-8.99856	7.72101886817557e-11	3.04470366688433e-09	14.5477	ZNF185	Down
-3.2769	11.4175	-13.9403	2.8147649197095e-16	5.93729421298882e-14	27.0326	MAP2	Down
-3.18468	11.6041	-5.76967	1.30137297741913e-06	1.26309730161268e-05	4.84476	SCEL	Down
-3.14493	13.6896	-4.44182	7.8305278960232e-05	0.000399429	0.811608	KRT5	Down
-3.13694	12.0851	-17.1891	3.40346970463069e-19	1.785481418845e-16	33.6593	RAB27B	Down
-3.11657	14.789	-6.62512	9.13149254184548e-08	1.29422537645897e-06	7.48376	NUCKS1	Down
-3.10754	14.2018	-5.85165	1.00809549704471e-06	1.01456802030022e-05	5.09781	CD55	Down
-3.07887	12.8132	-11.7841	4.56058996831693e-14	4.53887287322971e-12	21.9731	MYOF	Down
-3.06477	14.155	-6.62467	9.14420800273245e-08	1.29422537645897e-06	7.48237	PPP1R1B	Down
-2.97273	12.8611	-12.6921	5.00431828183127e-15	7.29699433187955e-13	24.1738	DGKA	Down
-2.96593	11.2424	-5.403	4.07488787764547e-06	3.33981006442315e-05	3.71558	RELL1	Down
-2.95906	14.1323	-15.0922	2.30495313885703e-17	7.2260280903168e-15	29.5097	ITGA3	Down
-2.95502	11.3853	-3.67464	0.000752319	0.00270318	-1.3799	IVL	Down
-2.92263	18.5216	-6.57471	1.06706605381253e-07	1.49341610656352e-06	7.32872	KRT20	Down
-2.89574	11.4463	-9.98551	4.94050429031643e-12	2.86823721298926e-10	17.2958	KLK7	Down
-2.88716	11.7572	-13.2818	1.25641388445902e-15	2.25077573015944e-13	25.5478	BCAS1	Down
-2.88236	13.063	-4.89741	1.94906951078938e-05	0.000123317	2.1736	HLA-B	Down
-2.8811	11.2653	-3.91345	0.000377184	0.00152282	-0.715174	PSCA	Down
-2.86562	15.156	-6.79322	5.43838765178635e-08	8.29151297141136e-07	7.99982	WDR81	Down
-2.85638	13.0644	-4.04783	0.000254218	0.001091	-0.333577	UGT1A10	Down
-2.84922	11.3092	-10.5097	1.20783159894854e-12	8.50910575888465e-11	18.7032	MOCOS	Down
-2.84838	11.8227	-5.20572	7.5183504926879e-06	5.5070160734992e-05	3.11114	KRT6B	Down
-2.82961	13.6105	-5.90329	8.58321806524485e-07	8.91006246176908e-06	5.25728	LYZ	Down
-2.82666	13.7203	-7.60357	4.61044967390847e-09	1.01429892825986e-07	10.461	CLU	Down
-2.82647	11.4862	-6.47005	1.47508629559437e-07	1.98310547121466e-06	7.00653	F3	Down
-2.82595	14.3023	-7.3908	8.76426594979217e-09	1.73898568054421e-07	9.81987	QSOX1	Down
-2.79868	11.3171	-11.4333	1.1006801612539e-13	1.01489185456793e-11	21.0945	PDE4D	Down
-2.79796	14.4197	-5.04569	1.23375983214507e-05	8.40834146472779e-05	2.62325	RAB11B	Down
-2.77675	15.4215	-12.1598	1.80534086903277e-14	2.05808859069735e-12	22.8966	PPL	Down
-2.75406	11.2818	-5.38011	4.37539290350786e-06	3.5489926914611e-05	3.6453	CST7	Down
-2.71819	11.8706	-9.48077	1.98404563217153e-11	9.56920470285808e-10	15.9061	CCDC9B	Down
-2.7163	11.4437	-7.6949	3.50416086083050e-09	8.01864547350628e-08	10.735	NLRP2	Down
-2.70261	13.962	-5.69928	1.62038176569923e-06	1.5166387120654e-05	4.62762	KRT2	Down
-2.6902	11.943	-12.7557	4.30208926763384e-15	6.42240469239624e-13	24.3243	SULT2B1	Down
-2.6741	15.4616	-2.63404	0.0122588	0.0282811	-4.00761	KRT13	Down
-2.62347	12.527	-7.54864	5.43974038371481e-09	1.16406731078129e-07	10.2959	NECTIN4	Down
-2.59037	20.3171	-25.1185	8.51514797101124e-25	5.33899777782405e-21	46.0836	KRT19	Down
-2.57399	13.092	-6.31819	2.36198245524862e-07	2.99184444331491e-06	6.53838	PALM3	Down
-2.57256	11.1738	-6.853	4.52513284941569e-08	7.07545709871231e-07	8.18296	RAC2	Down
-2.56805	17.3767	-9.4221	2.33701632798427e-11	1.11008275579253e-09	15.7424	S100A6	Down
-2.54283	12.3061	-7.33383	1.04168027500984e-08	2.01584423589867e-07	9.64751	ISG15	Down
-2.5424	13.7766	-15.5188	9.44791142506383e-18	3.48461203736178e-15	30.3902	FHL2	Down
-2.52675	12.6704	-7.10777	2.07308677389122e-08	3.64096752725433e-07	8.96104	CD82	Down
-2.51935	13.6685	-6.81578	5.07376326640761e-08	7.85493720503104e-07	8.06895	GDA	Down
-2.50371	11.5402	-5.38287	4.33793040980621e-06	3.52316368775711e-05	3.6538	SDSL	Down
-2.50204	16.7357	-6.19008	3.51625393669927e-07	4.19941184440084e-06	6.143	TPM4	Down
-2.48517	11.3356	-12.5259	7.44198842822495e-15	9.72109738436885e-13	23.779	APOBEC3G	Down
-2.48504	10.9561	-4.72439	3.31474773847817e-05	0.00019244	1.65248	MUC5AC	Down
-2.46418	12.8373	-11.2932	1.57172441963311e-13	1.3687100154305e-11	20.7391	S100A13	Down
-2.46408	11.6662	-10.0565	4.07352056524834e-12	2.43247370896258e-10	17.4886	PLCG2	Down
-2.46194	15.3763	-12.7711	4.14863872177498e-15	6.42240469239624e-13	24.3604	PGM1	Down
-2.45845	15.8663	-17.187	3.41718931836364e-19	1.785481418845e-16	33.6554	FUCA1	Down
-2.45593	11.7757	-4.24932	0.0001397	0.000656117	0.247577	INAVA	Down
-2.45187	11.7346	-5.51049	2.91681529376017e-06	2.51906775370196e-05	4.04599	IQGAP2	Down
-2.44128	12.8661	-7.22953	1.43020541678321e-08	2.67068308641647e-07	9.33127	APOBEC3F	Down
-2.41964	11.1271	-7.43126	7.75402867911387e-09	1.5632720198728e-07	9.94209	PALLD	Down
-2.41309	11.1396	-6.86728	4.33081016092304e-08	6.80555882430764e-07	8.22669	ADGRG6	Down
-2.4104	15.3423	-5.14526	9.06719257144723e-06	6.46037470715615e-05	2.92653	NT5E	Down
-2.40647	14.1767	-4.6115	4.67898754110691e-05	0.000258318	1.31488	SELENBP1	Down
-2.37606	17.0699	-14.5458	7.42293524047361e-17	2.11553654353498e-14	28.3531	ANXA3	Down
-2.36655	13.9727	-4.12729	0.000200944	0.000892926	-0.105587	ALDH3A1	Down
-2.34889	12.3453	-7.62951	4.26434500150482e-09	9.54908684265544e-08	10.539	SPAG1	Down
-2.3335	11.4661	-7.83385	2.31211644623427e-09	5.4705547614675e-08	11.1502	SERPINB8	Down
-2.32125	12.5756	-5.40534	4.04528951524627e-06	3.32860436490736e-05	3.72278	THBS1	Down
-2.30681	12.0092	-4.7159	3.40199915462012e-05	0.000196414	1.62701	FAM3D	Down
-2.28834	12.1904	-5.81534	1.12880270069455e-06	1.11633957939351e-05	4.98572	NMI	Down
-2.2793	11.8694	-8.7988	1.36734959721241e-10	4.98446626425688e-09	13.9763	LIPH	Down
-2.2772	10.8417	-4.79629	2.65937309658515e-05	0.000161416	1.86851	CEACAM7	Down
-2.24927	11.0975	-5.15135	8.89777169123401e-06	6.34687468760378e-05	2.94512	KRT16	Down
-2.23119	11.1725	-11.2051	1.96940978549649e-13	1.62930258094004e-11	20.514	NRP2	Down
-2.22942	14.4893	-11.4092	1.17026005565905e-13	1.06341022449018e-11	21.0334	SH3BGRL3	Down
-2.22161	10.946	-6.01281	6.10316041310427e-07	6.63451179277983e-06	5.59554	PPP1R12B	Down
-2.21385	13.0595	-6.36581	2.03758986642287e-07	2.61796894722774e-06	6.68525	CRYBG2	Down
-2.21307	12.0312	-3.94138	0.000347604	0.00141985	-0.63628	MSLN	Down
-2.20689	11.644	-3.29911	0.00215582	0.00657123	-2.38435	STYXL2	Down
-2.20635	12.5288	-6.52699	1.23671203258986e-07	1.70421636139307e-06	7.18189	EXPH5	Down
-2.20103	11.6991	-8.86115	1.14335418596117e-10	4.24191168400977e-09	14.1552	FUT3	Down
-2.19852	21.3835	-21.5126	1.80938872399353e-22	5.67243364971973e-19	40.9831	KRT18	Down
-2.19404	12.2817	-3.25141	0.00245619	0.00734047	-2.50788	PLS3	Down
-2.19273	14.9287	-2.92028	0.00593351	0.0153859	-3.33655	GSTM3	Down
-2.18367	14.9046	-4.78496	2.75340110832661e-05	0.000165998	1.83443	KRT1	Down
-2.18042	11.5929	-8.26023	6.53970702031035e-10	1.90716107057423e-08	12.412	CLSTN1	Down
-2.18039	21.7788	-20.6291	7.56844895339936e-22	1.25036276701944e-18	39.6047	KRT8	Down
-2.15875	13.617	-4.62284	4.52002079460402e-05	0.000251425	1.3487	GNE	Down
-2.15416	11.7151	-8.58113	2.56302871128989e-10	8.73379892379761e-09	13.3482	SETD7	Down
-2.15062	12.3666	-7.16955	1.71690997543853e-08	3.08453454040103e-07	9.14903	GDPD3	Down
-2.14397	11.6511	-8.0576	1.18878485871908e-09	3.10570044340359e-08	11.8148	LGALS9	Down
-2.13918	11.2325	-5.688	1.6783369422451e-06	1.56362149002627e-05	4.59282	GATM	Down
-2.12337	11.0745	-4.55046	5.63388943363248e-05	0.000302954	1.13322	LTBP3	Down
-2.11569	13.446	-4.06606	0.00024089	0.00104021	-0.281403	RIOK3	Down
-2.11459	11.4336	-5.18252	8.07890939900277e-06	5.85604184182051e-05	3.04026	FAS	Down
-2.09815	12.6938	-12.5608	6.84453581565679e-15	9.32939990525393e-13	23.8622	EPS8L1	Down
-2.09097	13.4733	-9.73578	9.78834597744057e-12	5.24554951098738e-10	16.6124	NT5DC3	Down
-2.09046	16.327	-5.44595	3.56546524468279e-06	2.98869880804293e-05	3.84752	SQOR	Down
-2.08214	11.0786	-8.00419	1.39270855115002e-09	3.57880435070107e-08	11.6566	SERPINA1	Down
-2.08061	16.778	-17.8049	1.06471083020721e-19	7.4642304812005e-17	34.7972	CAST	Down
-2.07956	15.7911	-11.3183	1.47427441862252e-13	1.32052865782331e-11	20.803	EVPL	Down
-2.07345	12.6545	-4.38592	9.26967791220372e-05	0.000463484	0.647019	SIPA1	Down
-2.07192	11.5945	-4.97113	1.5530670381604e-05	0.000101224	2.39683	GSTM1	Down
-2.06942	13.4145	-10.2301	2.54893023573672e-12	1.59817925780692e-10	17.9571	LIMA1	Down
-2.06623	17.953	-13.545	6.86887399379544e-16	1.26670117473816e-13	26.1475	AHNAK	Down
-2.06593	13.471	-10.958	3.7247411612691e-13	2.84806427818991e-11	19.878	VILL	Down
-2.06196	14.5394	-2.73703	0.00948222	0.0227331	-3.7714	HSPA2	Down
-2.05399	10.7035	-4.41805	8.41354729706031e-05	0.000425427	0.741533	CAPS	Down
-2.03706	11.4141	-7.6861	3.5979248850076e-09	8.20326873781734e-08	10.7086	STXBP5	Down
-2.03442	13.1257	-6.70366	7.16612565078451e-08	1.04008351459303e-06	7.72506	COTL1	Down
-2.0315	12.7904	-5.60765	2.15552180113793e-06	1.9418278294734e-05	4.34515	S100A14	Down
-2.02737	11.2863	-5.13416	9.38420170115238e-06	6.67108216170356e-05	2.89268	B3GALT5	Down
-2.0256	14.7168	-8.28406	6.09787151022825e-10	1.81202153408204e-08	12.4819	PRDX5	Down
-2.0156	11.841	-6.30196	2.48397716391049e-07	3.12114966286949e-06	6.48833	SLFN5	Down
-2.0133	10.8461	-4.64903	4.17309107320601e-05	0.000235088	1.42688	ANXA10	Down
-1.99984	10.4979	-4.48335	6.90580719038841e-05	0.000359033	0.934299	IMUP	Down
-1.98154	11.0381	-8.97472	8.2639337992377e-11	3.21831459138015e-09	14.4797	PIGR	Down
-1.97286	15.4068	-7.91473	1.81679035421476e-09	4.43240292643056e-08	11.3911	S100P	Down
-1.96912	11.7098	-6.91686	3.71923481904985e-08	5.94887814169453e-07	8.37839	DST	Down
-1.96555	11.0869	-6.98445	3.02299371291393e-08	4.97718651229191e-07	8.58497	GSDMB	Down
-1.94551	11.1246	-8.22513	7.25059508595127e-10	2.08537757747314e-08	12.3089	SLC9A1	Down
-1.94119	12.2898	-6.72286	6.75436407184292e-08	9.89482774076054e-07	7.78399	TBC1D2	Down
-1.92592	18.3598	-7.20582	1.53724449279121e-08	2.81828157011721e-07	9.25928	CALML3	Down
-1.92184	16.3168	-10.3551	1.82297752496289e-12	1.2159647959061e-10	18.292	GSN	Down
-1.92148	12.1877	-5.24165	6.72556539658376e-06	5.05627038807916e-05	3.22102	CADPS	Down
-1.92138	10.9054	-8.60827	2.36915933512779e-10	8.16188408310507e-09	13.4268	CCPG1	Down
-1.91674	16.0316	-14.2643	1.37272534698493e-16	3.44279517023821e-14	27.7443	MVP	Down
-1.91459	12.8418	-5.0075	1.38818654586469e-05	9.2300420387822e-05	2.50721	APOBEC3C	Down
-1.91397	12.3419	-3.85324	0.000449523	0.00175717	-0.884483	NRP1	Down
-1.91176	10.6843	-7.53308	5.70104357066151e-09	1.20761970229891e-07	10.2491	PRSS1	Down
-1.9103	10.6641	-4.23871	0.000144201	0.000674228	0.216735	CUEDC1	Down
-1.90938	12.3591	-8.54523	2.84449598738481e-10	9.43877256771591e-09	13.2441	TMX4	Down
-1.89931	10.9978	-4.20089	0.000161437	0.00073884	0.106979	MMP28	Down
-1.88013	12.0453	-6.25246	2.8966971953787e-07	3.5335197305495e-06	6.33557	HOXB8;HOXC8;HOXD8	Down
-1.87491	11.9675	-3.79631	0.000530193	0.00201722	-1.04352	RARRES1	Down
-1.87254	13.6199	-15.5695	8.50909855057878e-18	3.33450299450806e-15	30.4935	ARL6IP5	Down
-1.87031	12.0084	-4.2263	0.000149649	0.000694416	0.180677	TACSTD2	Down
-1.87001	11.7181	-3.2782	0.00228291	0.00688828	-2.43862	UGT1A8	Down
-1.86953	14.9955	-7.34952	9.93248918243037e-09	1.93405922900119e-07	9.69501	CKAP4	Down
-1.8683	11.4663	-3.80065	0.000523571	0.00199805	-1.03142	AHNAK2	Down
-1.86461	13.1321	-3.48497	0.0012874	0.00425737	-1.89401	RAD23A	Down
-1.84784	12.4353	-5.81256	1.13860330762792e-06	1.12249099667092e-05	4.97715	EOGT	Down
-1.84319	13.8485	-3.17814	0.0029963	0.00867349	-2.69568	KRT9	Down
-1.84005	15.5076	-11.3083	1.51248052650278e-13	1.33566942270035e-11	20.7774	CAPN2	Down
-1.83883	12.8718	-8.11428	1.00532761553388e-09	2.69376245700746e-08	11.9823	S100A16	Down
-1.83861	13.7209	-5.44169	3.61296530979069e-06	3.01641710950568e-05	3.83444	SORBS2	Down
-1.83651	12.3413	-3.62261	0.00087268	0.00306367	-1.52222	GALC	Down
-1.83624	11.6186	-4.22787	0.000148946	0.000692928	0.185257	GALNT5	Down
-1.83012	11.1925	-8.54515	2.8451802476847e-10	9.43877256771591e-09	13.2438	SYTL2	Down
-1.8295	11.4065	-4.44196	7.82729524947437e-05	0.000399429	0.812011	NTN4	Down
-1.82104	10.9626	-4.7626	2.94875385832867e-05	0.000175082	1.76719	SDR16C5	Down
-1.81972	13.8045	-8.01318	1.35605972302735e-09	3.4989689149718e-08	11.6833	ITGB6	Down
-1.80665	17.1175	-5.42548	3.7997130532676e-06	3.14718637304991e-05	3.78465	TSPAN8	Down
-1.79848	10.7532	-5.943	7.58467500425168e-07	7.99247197138088e-06	5.37993	VWA5A	Down
-1.79775	10.7886	-6.42815	1.67950147199282e-07	2.19384879779063e-06	6.87744	AASS	Down
-1.79346	12.6571	-6.18713	3.54867354493293e-07	4.21404983460786e-06	6.13388	UTRN	Down
-1.77466	12.0319	-5.24691	6.61677102505791e-06	4.98045069953338e-05	3.2371	CA12	Down
-1.77062	11.6736	-7.91208	1.83115881869919e-09	4.45014178032709e-08	11.3832	KCNN4	Down
-1.76984	11.0926	-6.78634	5.55477591788904e-08	8.37222235701064e-07	7.97873	KLK10	Down
-1.7698	13.7988	-5.0544	1.20099377154889e-05	8.22077614368074e-05	2.64975	CEMIP2	Down
-1.76398	12.288	-5.73895	1.43203513897115e-06	1.36664540659804e-05	4.74998	DHRS3	Down
-1.76313	10.96	-5.24886	6.57688264455841e-06	4.95883344726032e-05	3.24307	TRIM22	Down
-1.76178	13.4104	-4.76856	2.895329957251e-05	0.000172308	1.78512	FBP1	Down
-1.75665	15.1824	-3.64174	0.00082641	0.00292464	-1.47	MAGI1	Down
-1.75233	16.0517	-9.61128	1.38055378919612e-11	7.07659743241131e-10	16.2687	AGRN	Down
-1.74909	16.037	-6.28212	2.64178048470555e-07	3.27999279982253e-06	6.42711	ITGB1	Down
-1.74642	13.9578	-3.15672	0.00317439	0.00910912	-2.75012	KRT10	Down
-1.74617	11.5713	-5.00678	1.39129685950143e-05	9.23114424240631e-05	2.50501	ITGA1	Down
-1.74591	13.7431	-5.54075	2.65464742933759e-06	2.31504743383831e-05	4.13912	PBXIP1	Down
-1.73043	10.6034	-4.24013	0.000143592	0.000671884	0.220847	KRT4	Down
-1.72587	13.0771	-17.8015	1.07142064323452e-19	7.4642304812005e-17	34.7911	CRYBG1	Down
-1.72064	12.0003	-4.74633	3.09940917240226e-05	0.000182644	1.71833	ST3GAL4	Down
-1.7197	12.2443	-4.39571	9.00027267786933e-05	0.000451093	0.675779	RHOF	Down
-1.71753	14.4934	-7.06494	2.36297746916585e-08	4.0815065376501e-07	8.83053	LGMN	Down
-1.70774	12.1215	-7.0862	2.21429342374022e-08	3.85656104634755e-07	8.89533	MAPRE3	Down
-1.70247	14.1523	-10.7991	5.63464180734256e-13	4.15637695671034e-11	19.4647	ANKRD22	Down
-1.70205	15.9389	-9.94862	5.46268051842474e-12	3.1137278955021e-10	17.1954	SFN	Down
-1.70193	12.5941	-15.2135	1.78542429383014e-17	5.89190016963947e-15	29.762	AAK1	Down
-1.69666	11.0772	-4.7707	2.8764500259973e-05	0.000171602	1.79154	ZFYVE26	Down
-1.68991	11.324	-5.29534	5.69345431884738e-06	4.38549859695001e-05	3.38537	ATP8A1	Down
-1.6898	10.6356	-4.67757	3.82483292322203e-05	0.000218063	1.51223	RCN3	Down
-1.68834	10.7632	-4.66283	4.00092681268048e-05	0.000226816	1.46814	BST2	Down
-1.6883	10.5713	-3.51308	0.00118968	0.00398893	-1.81866	CHST4	Down
-1.68818	12.2704	-5.18112	8.11381894163139e-06	5.86544911554565e-05	3.03601	MAB21L4	Down
-1.68676	12.8836	-10.3786	1.71214476793042e-12	1.15431695644341e-10	18.3547	HID1	Down
-1.68015	12.5199	-2.89035	0.0064121	0.0164165	-3.40881	ALDH1L2	Down
-1.67887	11.1705	-5.58866	2.28681566779677e-06	2.04249775457062e-05	4.28665	LGALS1	Down
-1.66895	13.8708	-6.08609	4.8586685246167e-07	5.45947162174673e-06	5.82188	BLVRA	Down
-1.6664	11.0546	-3.62079	0.000877217	0.00307615	-1.52719	C7	Down
-1.66453	10.7822	-3.71033	0.000679209	0.00247884	-1.28174	SPON1	Down
-1.66334	14.9429	-10.2448	2.45028694241045e-12	1.55184839685995e-10	17.9965	LY75	Down
-1.66158	13.0487	-2.93592	0.00569696	0.0148815	-3.29861	H3-3A;H3-4;H3C1;H3C15	Down
-1.65888	11.8134	-7.52405	5.85842727466732e-09	1.23677909131866e-07	10.2219	NDRG2	Down
-1.65778	12.3745	-3.95786	0.000331227	0.0013633	-0.589639	OXCT1	Down
-1.65685	14.3267	-9.28642	3.4185689310833e-11	1.4989109928596e-09	15.3622	CDC42BPA	Down
-1.6449	14.5696	-8.55033	2.80267010575163e-10	9.39718800163782e-09	13.2589	OCIAD2	Down
-1.64101	10.7712	-6.77522	5.74829738476978e-08	8.55468730521991e-07	7.94462	DKK1	Down
-1.63925	11.5401	-4.05373	0.000249824	0.00107656	-0.316688	PRSS2	Down
-1.6365	11.9304	-4.74652	3.09765346280256e-05	0.000182644	1.71888	MYO5C	Down
-1.63484	10.6913	-4.52955	6.00310295255614e-05	0.000319249	1.07116	KRT14	Down
-1.63204	10.7446	-9.32167	3.09624686948216e-11	1.37684169302505e-09	15.4612	PAFAH2	Down
-1.63013	10.8224	-4.17422	0.000174788	0.000792425	0.029785	RPS4Y1	Down
-1.62581	11.358	-6.73716	6.4631623168887e-08	9.49040461988107e-07	7.82787	GRAMD2B	Down
-1.6253	11.4534	-9.13695	5.21193612505766e-11	2.13587186301383e-09	14.9406	TRIM38	Down
-1.62363	9.49145	-4.37771	9.50208149235643e-05	0.000473217	0.622876	FANCA	Down
-1.61538	12.3875	-9.48675	1.95122308883073e-11	9.48385175734004e-10	15.9228	PCDH1	Down
-1.61138	12.9957	-7.02598	2.66204594194583e-08	4.52331383631447e-07	8.71172	TMEM30B	Down
-1.6095	15.3716	-19.2459	7.91951283082207e-21	9.93106908985087e-18	37.3305	GNS	Down
-1.60884	15.1257	-5.04476	1.2373025269827e-05	8.421780983351e-05	2.62043	STK39	Down
-1.60704	11.4873	-3.23565	0.00256389	0.00758284	-2.54848	CYB5R2	Down
-1.60646	11.0345	-5.90989	8.40859446440466e-07	8.78698121530287e-06	5.27766	IFIT5	Down
-1.59543	10.9701	-5.21352	7.33858415108681e-06	5.40692392800403e-05	3.135	NFU1	Down
-1.59273	12.4936	-5.78936	1.22394724566718e-06	1.19721516853872e-05	4.90553	PRNP	Down
-1.59012	11.38	-7.92407	1.76699040737375e-09	4.32774603680992e-08	11.4188	MICALL2	Down
-1.58767	17.0552	-10.4443	1.43689083371117e-12	1.00103394748545e-10	18.5298	CTTN	Down
-1.58489	12.3595	-8.19928	7.8238544324289e-10	2.21970892720947e-08	12.2328	RAP1GDS1	Down
-1.58451	11.3453	-2.60267	0.0132431	0.0302492	-4.07833	MAP1B	Down
-1.58176	10.862	-4.45175	7.59887167494947e-05	0.000390337	0.840919	IL37	Down
-1.57935	13.781	-3.04628	0.0042633	0.0116984	-3.02743	ATAD1	Down
-1.57701	11.8074	-3.49172	0.00126325	0.00419522	-1.87594	VPS35L	Down
-1.57092	11.5601	-4.43428	8.01102862831666e-05	0.000406714	0.789367	CLDN2	Down
-1.57052	12.043	-3.89107	0.000402647	0.00161213	-0.778243	MGLL	Down
-1.56856	16.4898	-3.30912	0.00209738	0.00642118	-2.3583	AGR2	Down
-1.56847	10.7773	-7.894	1.93245673747061e-09	4.66019374766951e-08	11.3294	EPN3	Down
-1.56831	16.5221	-8.23799	6.98145214132879e-10	2.01722142516735e-08	12.3467	CAMK2D	Down
-1.56443	10.805	-3.76158	0.000586122	0.00219927	-1.14004	PLSCR4	Down
-1.56424	16.8231	-12.6401	5.66319491217825e-15	7.8907182443017e-13	24.0508	SCARB2	Down
-1.56406	13.9978	-5.21002	7.41862363899357e-06	5.44669440474118e-05	3.12431	ACBD5	Down
-1.5634	13.1599	-14.505	8.10958612973461e-17	2.21074369710591e-14	28.2656	ARHGEF10L	Down
-1.55853	11.5719	-5.31268	5.39490139390781e-06	4.2019915204723e-05	3.43852	PPP1R9A	Down
-1.55774	18.8808	-8.2753	6.25657630126216e-10	1.85041195325065e-08	12.4562	CALM1;CALM2;CALM3	Down
-1.55626	13.3077	-6.24579	2.95731859041995e-07	3.60046360425886e-06	6.31499	PLEC	Down
-1.55209	11.0729	-7.42657	7.86473284313234e-09	1.58050881174486e-07	9.92795	FNDC3B	Down
-1.54706	13.2899	-7.6417	4.11093670561039e-09	9.33897577687578e-08	10.5755	SYNE2	Down
-1.54506	13.5353	-2.71277	0.0100779	0.0239896	-3.82758	FAM114A1	Down
-1.54328	10.7583	-4.20565	0.000159161	0.000731626	0.120779	NIBAN1	Down
-1.53373	12.8667	-7.27046	1.26275443376635e-08	2.40652592696505e-07	9.45549	NECTIN2	Down
-1.5307	13.9402	-12.182	1.71020915945481e-14	1.98574285736697e-12	22.9505	FAM169A	Down
-1.5282	10.766	-6.13275	4.20234133048869e-07	4.86138010003028e-06	5.96597	STING1	Down
-1.52268	12.9672	-5.23848	6.79208125265964e-06	5.08839764360685e-05	3.21131	NOL3	Down
-1.52077	10.7555	-4.96449	1.58517796377855e-05	0.000102782	2.37671	LYPD3	Down
-1.51998	11.1376	-4.34364	0.00010528	0.000516111	0.52295	NOXO1	Down
-1.51933	18.998	-8.05286	1.20561252504533e-09	3.13659358175693e-08	11.8008	EZR	Down
-1.51654	13.3127	-2.99573	0.00487167	0.0130536	-3.1524	PROM1	Down
-1.516	14.6576	-5.76621	1.31546566450378e-06	1.27283483278375e-05	4.83409	WFS1	Down
-1.5145	10.5614	-5.11056	1.00952180833862e-05	7.09607818193181e-05	2.82074	MAPK8IP3	Down
-1.51244	11.9215	-7.00638	2.82661852356808e-08	4.73874281892295e-07	8.65192	PTK6	Down
-1.51059	15.8291	-17.0521	4.42736215328179e-19	2.13535082315976e-16	33.4014	PLS1	Down
-1.51036	10.8289	-3.15303	0.0032061	0.00917491	-2.75949	MYO5A	Down
-1.50829	11.6257	-3.58503	0.000970974	0.00335797	-1.62443	TAX1BP3	Down
-1.50798	11.7246	-4.85561	2.21647169815304e-05	0.000137325	2.04733	TPBG	Down
-1.50623	9.59392	-4.89331	1.97382813861197e-05	0.000124757	2.1612	CSNK1E	Down
-1.50457	15.0747	-7.37384	9.22635048373841e-09	1.82489645214637e-07	9.7686	EPHX1	Down
-1.50285	10.5339	-4.69247	3.65461425422223e-05	0.000209264	1.55682	SEMA5A	Down
-1.50229	14.1256	-11.4375	1.08924891280819e-13	1.01489185456793e-11	21.1049	CAPN5	Down
-1.49987	12.9727	-3.35876	0.00182934	0.00572353	-2.22851	PARP14	Down
-1.4935	10.9353	-3.07541	0.00394603	0.0109622	-2.95485	S100A9	Down
-1.4859	13.002	-3.83478	0.000474277	0.0018379	-0.93616	CYB5A	Down
-1.4837	10.5285	-4.5746	5.23511627759808e-05	0.000284932	1.205	RASAL1	Down
-1.46993	14.3412	-8.17491	8.40632326040979e-10	2.34777258612254e-08	12.1611	ACSF2	Down
-1.469	9.52355	-4.5627	5.4280043859936e-05	0.0002939	1.16962	AP5B1	Down
-1.46268	12.6499	-8.26535	6.44206690533851e-10	1.88746539703142e-08	12.427	SHROOM3	Down
-1.46241	10.83	-6.33307	2.25540649408122e-07	2.86263131941078e-06	6.58428	EHF	Down
-1.45785	10.3337	-6.03679	5.66419785950715e-07	6.1979966106649e-06	5.66961	RGS3	Down
-1.45759	12.226	-4.25285	0.000138233	0.000650298	0.257842	BTD	Down
-1.45459	12.7742	-6.52968	1.22649461659514e-07	1.6938593052977e-06	7.19015	UBE2H	Down
-1.45435	10.6852	-5.65098	1.88344048506926e-06	1.73409278140738e-05	4.47868	SNX18	Down
-1.453	14.2063	-9.89601	6.30640914915836e-12	3.4685250320371e-10	17.0518	PPP1R12A	Down
-1.45142	14.752	-13.9362	2.84081062822432e-16	5.93729421298882e-14	27.0235	GOLM1	Down
-1.44978	14.2796	-5.74985	1.38423649140234e-06	1.33320473135064e-05	4.78361	CD47	Down
-1.44666	14.6502	-13.0171	2.32419052862802e-15	3.93856070662099e-13	24.9366	PARP4	Down
-1.44535	10.6299	-4.55435	5.56758132721199e-05	0.000300605	1.14479	ST3GAL1	Down
-1.44502	13.3337	-5.11911	9.83184342586143e-06	6.94990510486484e-05	2.84678	MANBA	Down
-1.44242	10.6864	-5.42097	3.85345078088568e-06	3.18328542768817e-05	3.77077	LOXL4	Down
-1.43748	13.392	-9.40414	2.45731408230168e-11	1.14980293253967e-09	15.6923	SDF4	Down
-1.43649	10.8741	-6.79297	5.44258139734699e-08	8.29151297141136e-07	7.99905	DVL1	Down
-1.43498	16.5033	-11.4519	1.05014365713898e-13	9.97636474282035e-12	21.1414	VCL	Down
-1.43419	11.467	-8.34608	5.08407226300427e-10	1.52522167890128e-08	12.6636	ERBB2	Down
-1.43264	14.7125	-18.1483	5.64566700626658e-20	5.05690458989878e-17	35.4171	TNKS1BP1	Down
-1.43171	15.3091	-7.07097	2.31977048342368e-08	4.01794500858191e-07	8.84893	SERPINB5	Down
-1.43087	16.1164	-8.42015	4.0942019357653e-10	1.25836500672786e-08	12.88	HP1BP3	Down
-1.4273	12.6788	-6.09162	4.77575403994454e-07	5.38560752346264e-06	5.83897	LXN	Down
-1.42687	16.6195	-3.83809	0.000469737	0.00182446	-0.926889	ALCAM	Down
-1.42323	13.0097	-6.50338	1.33046980912508e-07	1.81348819635092e-06	7.10918	TBC1D10A	Down
-1.42299	12.9979	-2.77367	0.00864387	0.0210474	-3.68589	IFITM3	Down
-1.41976	17.2531	-9.40581	2.44587457481234e-11	1.14980293253967e-09	15.6969	MYL12A;MYL12B	Down
-1.4184	10.5871	-4.04907	0.000253283	0.00108773	-0.330008	NGEF	Down
-1.41528	10.7186	-7.29128	1.18535032081018e-08	2.27282767935163e-07	9.5186	FMN1	Down
-1.41525	10.8308	-5.8486	1.01769381907173e-06	1.02095043929276e-05	5.08842	SYBU	Down
-1.4107	10.4254	-5.66593	1.7977610921585e-06	1.66253127549171e-05	4.52477	FGF19	Down
-1.4081	15.6825	-4.78433	2.75869578389356e-05	0.000166158	1.83254	DOCK5	Down
-1.40527	12.854	-3.54734	0.00108019	0.00366891	-1.72641	ELOA	Down
-1.40323	17.484	-7.10625	2.08274613420055e-08	3.64771459816689e-07	8.9564	FLNB	Down
-1.40173	10.5228	-6.08109	4.93484700488144e-07	5.53515039724627e-06	5.80643	SLC37A1	Down
-1.40057	14.5421	-7.94955	1.63801261830901e-09	4.09176857242929e-08	11.4945	APP	Down
-1.39986	19.0457	-15.4275	1.14183550191375e-17	3.97739366499957e-15	30.2033	LMNA	Down
-1.39968	12.2705	-2.41869	0.0206297	0.0437283	-4.48115	SH3BGRL	Down
-1.39804	12.6195	-6.43593	1.6394811416964e-07	2.1550412491481e-06	6.90143	SYTL1	Down
-1.39317	14.9675	-5.10253	1.03492259050401e-05	7.24214803845998e-05	2.79627	TJP3	Down
-1.39216	10.5976	-5.03288	1.28358544486905e-05	8.68618301740843e-05	2.58429	TTC9	Down
-1.39212	13.3384	-5.11586	9.93118078920823e-06	7.01221886805581e-05	2.83687	LAMA3	Down
-1.39099	10.8168	-4.32274	0.000112104	0.000546148	0.46177	PDLIM2	Down
-1.38992	11.8488	-2.45287	0.0190233	0.0408481	-4.4079	PLAU	Down
-1.38792	10.4457	-6.69079	7.45637057345984e-08	1.07722220035929e-06	7.68552	ACP3	Down
-1.38775	11.5018	-2.49697	0.0171193	0.037335	-4.31232	CAV1	Down
-1.3869	10.2668	-5.85579	9.95158799412986e-07	1.00477386027688e-05	5.11062	CDS1	Down
-1.38655	14.3565	-7.19694	1.57938743110051e-08	2.88710180553942e-07	9.2323	ITGA2	Down
-1.38486	16.2374	-12.9643	2.63082928550971e-15	4.34086832109101e-13	24.8134	CAPN1	Down
-1.38174	15.254	-9.25232	3.76290242051745e-11	1.63843042893364e-09	15.2663	CTSD	Down
-1.38104	10.4837	-5.03198	1.28715098893361e-05	8.68723003295344e-05	2.58156	ACYP2	Down
-1.37822	12.3097	-3.09504	0.00374493	0.0104808	-2.9057	TOR4A	Down
-1.37478	17.4182	-8.91426	9.82084863570362e-11	3.77771294146391e-09	14.3072	SERPINB1	Down
-1.37218	11.3607	-5.07441	1.12895437661137e-05	7.79575323937588e-05	2.71064	NMES1	Down
-1.37169	9.92637	-3.98668	0.000304369	0.00126804	-0.507863	SETX	Down
-1.37047	11.8049	-5.10304	1.03330973112959e-05	7.23894079796931e-05	2.7978	FAM83B	Down
-1.36839	13.4389	-4.41736	8.43110687775986e-05	0.000425971	0.739499	REXO2	Down
-1.36771	14.3984	-12.1327	1.92907010400548e-14	2.15986956287756e-12	22.8305	INF2	Down
-1.36632	11.88	-5.03089	1.29146346140868e-05	8.706963336594e-05	2.57827	PAM	Down
-1.36552	13.5335	-3.40744	0.00159849	0.00511614	-2.10025	TMT1A	Down
-1.36529	16.7594	-8.66252	2.02500245495891e-10	7.09316502379461e-09	13.5837	PYGL	Down
-1.36507	15.703	-13.9411	2.80984397418622e-16	5.93729421298882e-14	27.0344	PPA2	Down
-1.36382	10.7188	-3.63734	0.00083685	0.00295442	-1.48204	TMC5	Down
-1.36317	11.9998	-3.34653	0.00189215	0.00589946	-2.26058	ADIRF	Down
-1.35982	13.3167	-2.62545	0.0125215	0.0288003	-4.02704	BCAM	Down
-1.35971	14.8145	-13.0229	2.29309643846081e-15	3.93856070662099e-13	24.95	NIBAN2	Down
-1.35848	12.083	-4.13501	0.000196397	0.000876447	-0.0833762	DNAJB2	Down
-1.3578	9.48555	-5.2879	5.82635141861038e-06	4.45502724325452e-05	3.3626	HNF1B	Down
-1.35429	12.566	-4.14976	0.000187974	0.000842457	-0.0408325	CYTH1;CYTH2;CYTH3	Down
-1.35257	16.2048	-13.6257	5.71729911768301e-16	1.08628683235977e-13	26.3296	S100A11	Down
-1.35041	12.4582	-3.4429	0.00144817	0.00469982	-2.00621	CTSH	Down
-1.34925	10.9799	-4.01412	0.000280771	0.00118309	-0.429772	CEACAM6	Down
-1.34616	16.0006	-11.8336	4.03191405712712e-14	4.21335018969784e-12	22.0959	MYL6	Down
-1.34589	14.2135	-5.16775	8.45717952512706e-06	6.07405677234211e-05	2.99516	PGM2L1	Down
-1.34481	11.3298	-2.86397	0.00686364	0.0173949	-3.4721	NFIB	Down
-1.34185	10.5231	-4.96821	1.56713949138812e-05	0.000101718	2.38796	NDNF	Down
-1.34033	12.4698	-3.31801	0.00204678	0.00629701	-2.33513	GPX8	Down
-1.33888	12.6796	-4.03471	0.000264247	0.00112556	-0.371051	MINPP1	Down
-1.33509	20.1054	-10.1632	3.05216396796648e-12	1.85796777467474e-10	17.7771	ANXA2	Down
-1.33429	11.3934	-3.82027	0.000494659	0.00190682	-0.976708	LDLRAP1	Down
-1.33184	14.8586	-14.0897	2.0185759323451e-16	4.68758188733473e-14	27.3623	CGN	Down
-1.33137	10.5322	-4.78374	2.76372067100595e-05	0.000166301	1.83076	LIF	Down
-1.32346	10.6972	-6.80633	5.22344218656539e-08	8.02947127115155e-07	8.03999	USP54	Down
-1.3184	10.6179	-5.36479	4.58873521787309e-06	3.6839141889967e-05	3.59829	ALDH1L1	Down
-1.31541	11.7631	-8.90698	1.0027666729843e-10	3.8337481948851e-09	14.2863	ELMO2	Down
-1.31444	14.3909	-6.13783	4.13637767103501e-07	4.80279407359065e-06	5.98168	ASAH1	Down
-1.31016	10.8726	-9.04835	6.7010925338789e-11	2.67241982855225e-09	14.6893	BICDL2	Down
-1.30768	14.0898	-6.23059	3.10029605546155e-07	3.75993351407039e-06	6.26807	FAM3C	Down
-1.3075	14.7003	-8.87174	1.10915685090179e-10	4.13953181854417e-09	14.1855	SH3KBP1	Down
-1.30498	10.578	-4.52322	6.11964326888367e-05	0.000324072	1.05237	CIB1	Down
-1.30214	10.8682	-4.19163	0.000165956	0.000756759	0.0801555	MUC5B	Down
-1.29873	12.9918	-6.35658	2.09672276802949e-07	2.68843594182922e-06	6.65681	TBC1D17	Down
-1.29792	11.028	-3.27291	0.00231615	0.00697182	-2.45232	PRUNE2	Down
-1.2979	9.48592	-3.41865	0.00154943	0.0049902	-2.07058	DGKQ	Down
-1.29761	9.79149	-4.34252	0.000105635	0.000517444	0.519674	COX15	Down
-1.29665	14.8991	-6.2844	2.62316319848359e-07	3.26982768478969e-06	6.43414	RNASET2	Down
-1.29365	16.5396	-6.66847	7.98793674644706e-08	1.14347861644345e-06	7.61696	PYGB	Down
-1.29087	10.9985	-4.91658	1.83739998938477e-05	0.000117317	2.23157	CYP4F12	Down
-1.29058	10.5973	-3.47563	0.00132155	0.00435196	-1.91899	DPYD	Down
-1.29014	10.5819	-5.30711	5.48917317629927e-06	4.26482228195742e-05	3.42143	PLAT	Down
-1.28781	12.8637	-9.9878	4.90971259549795e-12	2.86823721298926e-10	17.302	PCM1	Down
-1.28681	13.8873	-5.23845	6.79264565821202e-06	5.08839764360685e-05	3.21123	RHOC	Down
-1.28515	12.378	-8.45759	3.67067963572153e-10	1.18026468287046e-08	12.9892	SLC44A2	Down
-1.28353	15.5073	-9.06714	6.35287035252984e-11	2.56744106056237e-09	14.7427	LRRFIP1	Down
-1.2835	9.95502	-5.37154	4.49339446098233e-06	3.62594379283902e-05	3.61903	SHFL	Down
-1.28004	12.2311	-13.8712	3.28574311580101e-16	6.64568043099107e-14	26.8792	GIPC1	Down
-1.27732	18.606	-10.2616	2.34225024287983e-12	1.49856214518944e-10	18.0416	TPM3	Down
-1.27631	16.0248	-5.44799	3.54288874963348e-06	2.97374999467228e-05	3.85379	HSD17B4	Down
-1.27627	12.1993	-2.89283	0.00637116	0.0163383	-3.40284	TNFAIP2	Down
-1.2752	14.8007	-6.13573	4.1635819439647e-07	4.82544524744153e-06	5.97517	EPS8L2	Down
-1.27377	14.4841	-4.4482	7.68089514732402e-05	0.000393136	0.830439	CALU	Down
-1.27014	15.4571	-6.21448	3.25943334452784e-07	3.93769693067236e-06	6.21834	WASF2	Down
-1.27004	13.5422	-4.32832	0.000110241	0.000538328	0.47809	FN1	Down
-1.26387	14.932	-11.1967	2.01204258973694e-13	1.62930258094004e-11	20.4927	EHD1	Down
-1.2635	14.5259	-10.7798	5.92584775400867e-13	4.32035644391097e-11	19.4144	MYO1C	Down
-1.26214	12.8607	-5.90803	8.45732612829237e-07	8.80854399076298e-06	5.27193	ARHGAP27	Down
-1.25981	11.171	-2.8653	0.00684013	0.0173423	-3.46891	IGFBP3	Down
-1.25904	13.1858	-7.63368	4.21125315838634e-09	9.46399903336284e-08	10.5515	DSC2	Down
-1.25722	10.5241	-3.96509	0.000324278	0.00134029	-0.569138	PTGS2	Down
-1.25502	11.9638	-8.45445	3.70438627744927e-10	1.18502561018403e-08	12.98	RILPL1	Down
-1.25299	12.7555	-10.2793	2.23326113270371e-12	1.45859867729711e-10	18.0892	MFSD10	Down
-1.24986	12.9993	-10.9363	3.93996597026156e-13	2.94090317065952e-11	19.8219	TRIOBP	Down
-1.24864	12.829	-2.4364	0.0197826	0.042187	-4.44329	PRSS23	Down
-1.24716	10.6689	-7.53702	5.63368451487281e-09	1.19739667485602e-07	10.2609	AMPD3	Down
-1.24527	10.6892	-4.42228	8.30678440470127e-05	0.000420548	0.753992	TFPI	Down
-1.24476	14.5439	-5.58089	2.34286239330128e-06	2.08365208595731e-05	4.26269	ERGIC1	Down
-1.24353	16.7843	-2.66724	0.0112908	0.0264154	-3.93213	ALDH1A1	Down
-1.24303	12.2114	-10.2051	2.72671901067734e-12	1.69272556405415e-10	17.8897	RABEP2	Down
-1.24228	10.6657	-3.95344	0.000335546	0.00137778	-0.602161	ANXA9	Down
-1.23582	10.3053	-4.34968	0.000103385	0.000510012	0.540647	DYSF	Down
-1.23498	14.4922	-6.5697	1.08370702781674e-07	1.51332807670622e-06	7.31332	TINAGL1	Down
-1.23429	15.808	-9.35096	2.85193110386017e-11	1.29576869718864e-09	15.5434	TJP2	Down
-1.23361	13.7347	-9.35604	2.81164305476389e-11	1.29576869718864e-09	15.5576	SCP2	Down
-1.23231	12.394	-5.48499	3.15767348029767e-06	2.70472851386153e-05	3.96755	CHMP4C	Down
-1.23167	12.0561	-11.2794	1.62845357545594e-13	1.39868546823408e-11	20.7037	DCTD	Down
-1.22973	11.8202	-2.60055	0.013312	0.0303735	-4.08309	IQSEC2	Down
-1.22967	11.1094	-2.43845	0.0196866	0.0420418	-4.43889	PLA2G4A	Down
-1.22539	12.2327	-2.90701	0.00614143	0.0158334	-3.36865	SAG	Down
-1.22485	13.7505	-7.44258	7.49290354831614e-09	1.52040470058065e-07	9.97628	RTN4	Down
-1.22233	9.90428	-4.31727	0.000113962	0.000553906	0.445765	C2CD2L	Down
-1.22201	11.3617	-7.53816	5.61428928857011e-09	1.19733312378689e-07	10.2644	ZBTB7B	Down
-1.22039	13.3762	-6.98756	2.9943634743939e-08	4.95373587980204e-07	8.59445	LACTB	Down
-1.21999	11.2506	-4.11584	0.00020789	0.000916645	-0.138556	SPECC1	Down
-1.21939	9.63876	-4.05282	0.000250498	0.00107872	-0.319296	SEMA4D	Down
-1.21793	13.0002	-7.19438	1.59176067462837e-08	2.90126146218601e-07	9.22452	SVIL	Down
-1.21779	13.5935	-6.14288	4.07194263639595e-07	4.74555396472168e-06	5.99727	NHSL3	Down
-1.21663	10.9734	-3.83605	0.000472534	0.00183227	-0.932612	BMP1	Down
-1.21604	11.9358	-5.30297	5.56002446535777e-06	4.30959052220319e-05	3.40877	SPTBN2	Down
-1.21604	16.6259	-5.38828	4.26566747671982e-06	3.47347208818614e-05	3.67039	BAIAP2	Down
-1.21595	14.9698	-5.73996	1.42756480048477e-06	1.36445599070724e-05	4.75308	CMAS	Down
-1.21499	14.2824	-6.05549	5.34395037115616e-07	5.9094477649293e-06	5.72738	GAN	Down
-1.21254	9.32648	-3.79397	0.000533788	0.00202962	-1.05003	ULK1	Down
-1.21192	12.2611	-3.42258	0.00153257	0.00494554	-2.06016	CTH	Down
-1.20985	14.0776	-8.42879	3.99231802104879e-10	1.23742091634226e-08	12.9052	EPS8	Down
-1.20871	13.7848	-5.906	8.51103747310872e-07	8.84978523323245e-06	5.26565	ITGAV	Down
-1.20585	14.3276	-9.94462	5.52266552865713e-12	3.11955971753876e-10	17.1844	PDLIM5	Down
-1.20535	11.9622	-4.2035	0.000160183	0.000734475	0.114555	CIC	Down
-1.20477	13.6406	-4.9143	1.85033072830144e-05	0.000118022	2.22468	TXNL1	Down
-1.20225	10.2399	-4.71695	3.39106822140028e-05	0.000195963	1.63017	SLC15A1	Down
-1.19945	14.2349	-6.78833	5.52083191591356e-08	8.36125993062271e-07	7.98483	LAMB3	Down
-1.19849	11.5048	-6.63573	8.83714999897203e-08	1.26216242582129e-06	7.51638	CEP131	Down
-1.19839	11.2318	-2.5082	0.016663	0.0365559	-4.28778	ANXA13	Down
-1.19775	9.39367	-3.72706	0.000647354	0.00238117	-1.23559	NDFIP1	Down
-1.19592	16.4997	-14.6533	5.88209329880991e-17	1.7562249992161e-14	28.5834	WDR1	Down
-1.19532	18.1069	-10.039	4.27197499700062e-12	2.52691351237678e-10	17.4411	MYH9	Down
-1.19457	14.2325	-5.18051	8.12930666891414e-06	5.86544911554565e-05	3.03413	NT5C2	Down
-1.19423	14.4944	-9.12599	5.37619770162781e-11	2.18888049280561e-09	14.9096	ADAM10	Down
-1.19343	9.52351	-3.35949	0.00182568	0.00571777	-2.22661	PASK	Down
-1.19262	16.5813	-6.11048	4.50367281530444e-07	5.10633427702691e-06	5.8972	ASPH	Down
-1.1915	13.2534	-2.35334	0.0240474	0.0495163	-4.6191	MPP7	Down
-1.19024	14.7076	-3.73144	0.00063925	0.00236048	-1.22348	PDLIM1	Down
-1.18871	12.6113	-6.94304	3.43212809299622e-08	5.56057962353652e-07	8.45845	ARHGAP8	Down
-1.18718	10.5462	-3.95086	0.000338089	0.0013846	-0.609458	IGFBP6	Down
-1.18471	10.7082	-3.44316	0.00144713	0.00469982	-2.00553	RIGI	Down
-1.18454	10.6568	-4.05195	0.000251142	0.00108001	-0.321782	RPTN	Down
-1.18385	10.4002	-5.32966	5.11790071742633e-06	4.02487127670724e-05	3.49055	PPP1R14D	Down
-1.18022	13.0658	-7.36541	9.46530667981124e-09	1.86042234741117e-07	9.74308	TPRN	Down
-1.17816	16.471	-5.06632	1.15756421089407e-05	7.95825394989672e-05	2.686	SSR1	Down
-1.17811	10.5739	-4.9749	1.53512389014196e-05	0.000100263	2.40826	SPRR3	Down
-1.17759	13.1663	-5.2305	6.96221419410751e-06	5.18445166235797e-05	3.18692	ADAM9	Down
-1.17445	15.8117	-5.82554	1.09351080628106e-06	1.09176954703539e-05	5.0172	NAP1L1	Down
-1.17161	13.7928	-7.90154	1.8895302349329e-09	4.57426817491479e-08	11.3519	SARG	Down
-1.16573	10.8366	-3.10695	0.00362768	0.0102044	-2.87579	ITIH4	Down
-1.1655	12.0264	-4.67597	3.84358752412922e-05	0.000218687	1.50743	NFXL1	Down
-1.16436	14.8621	-2.48435	0.0176457	0.0383098	-4.3398	PAPSS2	Down
-1.16381	13.184	-6.06148	5.24534401552558e-07	5.82713969032089e-06	5.74586	ZNF330	Down
-1.16142	10.2002	-4.45138	7.60752527248685e-05	0.000390337	0.839808	PIP4P2	Down
-1.16134	12.3541	-4.14041	0.000193268	0.00086433	-0.0677909	PDCL	Down
-1.16105	11.0784	-3.68363	0.000733218	0.00264668	-1.35522	SEMA3B	Down
-1.16066	13.8077	-9.3348	2.9842037653091e-11	1.34461112084859e-09	15.4981	MVK	Down
-1.15791	16.669	-12.538	7.22843476856063e-15	9.64303957422875e-13	23.8079	IQGAP1	Down
-1.15652	12.0466	-6.21195	3.28514983499636e-07	3.9535296478747e-06	6.21054	SH2D4A	Down
-1.15296	10.6045	-4.16089	0.000181859	0.000818563	-0.0087257	DDX43	Down
-1.15277	13.6573	-4.00235	0.000290665	0.00121904	-0.463292	OXR1	Down
-1.15234	14.5495	-6.80198	5.29375039928488e-08	8.11535819156875e-07	8.02667	LYPLAL1	Down
-1.14983	14.3856	-7.17935	1.66638532843149e-08	3.01101902284307e-07	9.17882	CTSB	Down
-1.14843	10.9932	-2.91527	0.00601123	0.0155489	-3.34868	COL17A1	Down
-1.14642	13.8718	-5.321	5.25735909189102e-06	4.11132768568452e-05	3.46401	CHMP2B	Down
-1.1462	16.1642	-10.5807	1.0006310329092e-12	7.12949610947807e-11	18.8912	PACSIN2	Down
-1.14601	15.2712	-5.50604	2.95747630804685e-06	2.55067076361125e-05	4.0323	NCEH1	Down
-1.14592	12.9969	-4.09754	0.000219473	0.00095895	-0.191141	IDUA	Down
-1.14576	14.0762	-4.6832	3.75962103606404e-05	0.000214689	1.52907	HSD17B11	Down
-1.14536	11.1571	-2.66446	0.0113691	0.026549	-3.93847	CYBRD1	Down
-1.14513	12.4474	-5.29322	5.73097780287948e-06	4.39819226732611e-05	3.37889	TMF1	Down
-1.14448	11.4565	-3.75892	0.00059062	0.00221086	-1.1474	PARP9	Down
-1.14425	11.77	-5.55167	2.56595695874619e-06	2.26280592564538e-05	4.17272	CDC42BPG	Down
-1.14152	16.6759	-3.34111	0.00192066	0.00597645	-2.27478	ACTN2	Down
-1.13864	11.6335	-4.73897	3.17008892140425e-05	0.000186251	1.69622	STAT2	Down
-1.13622	10.9572	-2.54349	0.0153007	0.0339714	-4.21018	S100A8	Down
-1.13281	15.9845	-15.7124	6.34200171196981e-18	2.65095671560338e-15	30.7833	HADH	Down
-1.13279	10.3089	-3.73207	0.000638091	0.00235759	-1.22173	SNX12	Down
-1.13216	13.835	-4.7195	3.36474692409102e-05	0.000194928	1.6378	LPCAT4	Down
-1.13163	14.9596	-8.62579	2.2519710572029e-10	7.84436584925677e-09	13.4775	TWF1	Down
-1.1245	14.869	-9.423	2.3311164274242e-11	1.11008275579253e-09	15.745	RAB5B	Down
-1.12435	14.9689	-6.45183	1.56070865131972e-07	2.08205175399461e-06	6.95041	MISP	Down
-1.12256	12.8515	-5.61106	2.13277584405097e-06	1.93319187116262e-05	4.35564	CCDC186	Down
-1.12189	14.5638	-5.15763	8.7262909790677e-06	6.25301079300051e-05	2.96429	ARRB1	Down
-1.12127	14.1656	-4.19627	0.000163676	0.000747993	0.0935977	LDLR	Down
-1.12089	10.6269	-5.22919	6.99050877674766e-06	5.18704024026128e-05	3.18292	FBXO3	Down
-1.12072	11.72	-7.76156	2.86974223256129e-09	6.68895308481758e-08	10.9345	STK11IP	Down
-1.12068	10.4283	-4.20475	0.000159588	0.000733053	0.118173	CA13	Down
-1.12009	10.8445	-5.27003	6.15865839209149e-06	4.69195481390202e-05	3.30788	PTK2B	Down
-1.11997	16.8497	-7.44837	7.36299161565497e-09	1.50638363506558e-07	9.99374	RCN1	Down
-1.11801	14.1521	-5.29116	5.76775673201591e-06	4.4186440468538e-05	3.37257	GBE1	Down
-1.11787	10.6308	-4.45522	7.51961716212048e-05	0.000387094	0.851154	SNCG	Down
-1.11729	20.6045	-7.26193	1.29592615809382e-08	2.45482084931971e-07	9.42962	ACTBL2	Down
-1.11695	13.0571	-5.00787	1.38660275595631e-05	9.2292985985627e-05	2.50834	OPTN	Down
-1.11682	12.5555	-6.25864	2.84164589519644e-07	3.47312276079565e-06	6.35463	FGD4	Down
-1.11608	14.1867	-7.49453	6.40440680393066e-09	1.33407410832709e-07	10.133	FKBP8	Down
-1.11387	10.5902	-3.78139	0.000553549	0.00208946	-1.08503	C5	Down
-1.11352	13.9487	-9.92909	5.76167970089446e-12	3.19696740925737e-10	17.1421	CEP170B	Down
-1.11157	12.7435	-6.08752	4.83708133070939e-07	5.44497305988292e-06	5.8263	GALNT1	Down
-1.11098	11.7952	-8.20239	7.75259765381838e-10	2.20949033133824e-08	12.242	AFAP1	Down
-1.10787	15.5568	-8.35763	4.91506544406389e-10	1.48160866991734e-08	12.6974	CCDC6	Down
-1.10691	16.8779	-5.645	1.91882858765232e-06	1.75892620534796e-05	4.46026	SRSF2	Down
-1.10675	11.4682	-6.27025	2.74096542515604e-07	3.38304197160007e-06	6.39048	ETV6	Down
-1.10225	11.7634	-3.48027	0.00130448	0.00430251	-1.90658	TOLLIP	Down
-1.09916	13.471	-6.58261	1.04129597970307e-07	1.46060979703316e-06	7.35305	CASP3	Down
-1.09557	11.7543	-2.84589	0.00718996	0.0180831	-3.51524	TESC	Down
-1.09529	11.9115	-3.75181	0.000602847	0.00224857	-1.1671	DNAJC1	Down
-1.09315	14.4754	-6.2671	2.76797788006494e-07	3.40967019803677e-06	6.38074	ITPRID2	Down
-1.09256	12.4157	-4.28875	0.000124143	0.000594635	0.362449	MICOS10	Down
-1.09154	14.2916	-4.03794	0.000261738	0.00111843	-0.361809	SERPINB9	Down
-1.0906	11.128	-4.87211	2.10684832909843e-05	0.000131442	2.09714	MAP3K5	Down
-1.09018	15.4097	-5.76994	1.30026361142366e-06	1.26309730161268e-05	4.84561	CHMP5	Down
-1.08981	10.603	-3.97985	0.000310536	0.00129115	-0.527264	CYSRT1	Down
-1.08954	13.9879	-4.31673	0.000114148	0.000554306	0.444172	MPRIP	Down
-1.08683	13.9442	-9.71451	1.03790969300799e-11	5.51499472471192e-10	16.5538	PML	Down
-1.08343	14.5484	-8.08527	1.09532141909883e-09	2.89774907078045e-08	11.8966	PFKFB2	Down
-1.08176	12.1735	-6.67229	7.89431109142967e-08	1.13266202616165e-06	7.6287	CAPN7	Down
-1.08011	11.8934	-5.5508	2.57291026713706e-06	2.26575103580749e-05	4.17005	LPIN1	Down
-1.07972	11.4499	-4.04703	0.000254817	0.00109207	-0.335856	THEM4	Down
-1.07765	12.2005	-7.05178	2.46001724543251e-08	4.22583784352379e-07	8.79041	FYCO1	Down
-1.07737	13.7774	-6.60261	9.78905335759364e-08	1.37926661914859e-06	7.41454	NPNT	Down
-1.07681	11.0778	-4.56867	5.33051024382538e-05	0.000289371	1.18734	NDUFA2	Down
-1.07543	10.3768	-4.77081	2.87548042707449e-05	0.000171602	1.79187	PRKAG2	Down
-1.07426	10.629	-4.81292	2.52705305939771e-05	0.000154131	1.91859	STK17B	Down
-1.07415	14.307	-3.98975	0.000301634	0.00126068	-0.499131	CD59	Down
-1.07316	10.7769	-4.1275	0.000200819	0.000892926	-0.104984	BMP2K	Down
-1.07298	9.74513	-3.6757	0.000750053	0.00269658	-1.37701	FEM1B	Down
-1.07234	13.26	-7.11686	2.01630328454643e-08	3.55118584104104e-07	8.98873	MICAL2	Down
-1.06838	13.4157	-7.17141	1.70719647110001e-08	3.07589709017157e-07	9.15469	ENDOD1	Down
-1.06788	12.1445	-7.39666	8.61025272146035e-09	1.71385030360497e-07	9.83756	ARK2N	Down
-1.06764	10.3719	-3.03119	0.004437	0.0121062	-3.06487	CCN1	Down
-1.06701	14.3848	-4.0762	0.00023378	0.0010144	-0.252368	LGALS3	Down
-1.06575	13.9773	-4.16221	0.000181144	0.000817692	-0.00489943	AK1	Down
-1.06345	13.9364	-6.15719	3.89477482172611e-07	4.55601457690722e-06	6.04145	OCLN	Down
-1.06012	10.2722	-3.76927	0.000573261	0.00215488	-1.1187	PRR9	Down
-1.0594	13.7371	-4.18181	0.00017088	0.000776953	0.0517499	CALCOCO1	Down
-1.05871	12.3426	-5.74653	1.39864604772299e-06	1.34079653148038e-05	4.77335	TMEM165	Down
-1.05821	10.3547	-4.30909	0.000116795	0.00056418	0.421849	CCL15	Down
-1.05764	13.8109	-7.8555	2.16748094180212e-09	5.16734049623547e-08	11.2148	TMX3	Down
-1.05681	10.9374	-3.08505	0.00384603	0.0107271	-2.93074	SLC35A1	Down
-1.05433	12.905	-6.23348	3.07263344067356e-07	3.73360691337659e-06	6.27698	BSDC1	Down
-1.05432	12.6916	-8.45249	3.72563205939957e-10	1.1851426448014e-08	12.9743	SLAIN2	Down
-1.05391	14.8328	-5.87208	9.45924535563956e-07	9.62816045127598e-06	5.16092	CAPNS1	Down
-1.05372	15.1323	-12.2372	1.49482251413935e-14	1.76840323842523e-12	23.0846	EML2	Down
-1.05332	11.4227	-5.29869	5.63447022739591e-06	4.3507547199227e-05	3.39564	CRACDL	Down
-1.05139	10.2042	-4.38348	9.33821256159671e-05	0.000466167	0.639837	PODXL2	Down
-1.05135	14.3786	-8.36918	4.75177927062008e-10	1.44629398188291e-08	12.7312	CLTB	Down
-1.0501	11.3397	-3.29915	0.00215559	0.00657123	-2.38425	MAN2B2	Down
-1.04819	14.257	-6.44027	1.61758411155034e-07	2.13591898502736e-06	6.9148	STIM1	Down
-1.04605	12.2898	-7.18295	1.64816862664671e-08	2.98671019915459e-07	9.18978	ERBIN	Down
-1.04544	11.5547	-2.3562	0.0238876	0.0492573	-4.61312	ERAP2	Down
-1.04521	12.7771	-4.53533	5.89868813131469e-05	0.000314764	1.08832	TRIM16	Down
-1.0414	13.8583	-7.55039	5.41109183537637e-09	1.16190225369212e-07	10.3012	CDCP1	Down
-1.03881	14.3992	-6.8994	3.92398996575457e-08	6.24452210286323e-07	8.32499	ATP6V0D1	Down
-1.03631	16.5716	-8.99291	7.84624765660881e-11	3.07474830043358e-09	14.5316	MGST1	Down
-1.03506	10.1675	-3.65001	0.000807164	0.00287389	-1.44741	CUL9	Down
-1.03477	10.4979	-5.06094	1.17697823875625e-05	8.07401920897341e-05	2.66963	SMPDL3A	Down
-1.03422	12.976	-4.1036	0.000215569	0.000944527	-0.173738	PAWR	Down
-1.03318	14.9616	-7.04175	2.53663092811097e-08	4.33369916056016e-07	8.75983	SPINT1	Down
-1.03283	9.90871	-3.44803	0.00142757	0.00465233	-1.99256	GDPGP1	Down
-1.03149	12.4461	-6.43254	1.65680772945306e-07	2.16872327007738e-06	6.89097	CTBS	Down
-1.0308	15.8428	-4.98022	1.51014085060301e-05	9.89402626257141e-05	2.42439	SERPINB6	Down
-1.02864	10.7218	-2.94671	0.00553894	0.0145554	-3.27236	CRACR2B	Down
-1.02756	10.1957	-4.80477	2.59102039954918e-05	0.000157572	1.89406	MIDEAS	Down
-1.02672	14.802	-2.75675	0.00902217	0.0218329	-3.72548	HLA-C	Down
-1.02626	10.535	-4.29667	0.000121228	0.00058424	0.385584	POLR3GL	Down
-1.02593	10.9184	-4.17454	0.000174621	0.000792239	0.030715	PIGG	Down
-1.02582	14.8872	-5.57146	2.41263848507717e-06	2.13963837361158e-05	4.23366	PYM1	Down
-1.02575	9.92942	-4.02873	0.000268948	0.00114326	-0.388126	IFT56	Down
-1.0251	12.9663	-4.79873	2.63951209345036e-05	0.000160366	1.87587	RAB32	Down
-1.02275	9.92595	-3.50264	0.0012251	0.004088	-1.84667	PHF20	Down
-1.02268	13.9451	-5.58587	2.30675895872792e-06	2.05445719761705e-05	4.27806	TAOK3	Down
-1.02228	11.8566	-5.32091	5.25882743846728e-06	4.11132768568452e-05	3.46373	RAB2B	Down
-1.02208	10.2633	-3.87519	0.000421711	0.00167456	-0.822883	MTG1	Down
-1.02119	16.0969	-6.04889	5.45496463877225e-07	6.00046110264947e-06	5.70697	ANXA11	Down
-1.01817	15.4101	-5.93949	7.66822993563176e-07	8.05356812335195e-06	5.36907	NUCB1	Down
-1.01682	13.489	-3.87006	0.000428057	0.00169332	-0.837292	TJP1	Down
-1.01678	15.2877	-10.4311	1.48838644530995e-12	1.02551461671356e-10	18.4946	GAK	Down
-1.01677	15.8658	-3.88135	0.000414213	0.00165106	-0.805573	ROCK2	Down
-1.01613	11.2359	-4.01655	0.000278768	0.00117687	-0.422845	PGPEP1	Down
-1.01608	10.7339	-4.71928	3.36693360606445e-05	0.000194928	1.63717	ARVCF	Down
-1.01301	13.0323	-4.0367	0.000262699	0.00112125	-0.365358	ZNF428	Down
-1.01244	10.5027	-3.29209	0.00219774	0.00667305	-2.4026	KYNU	Down
-1.01115	9.62618	-3.53679	0.00111284	0.00375944	-1.75487	PCTP	Down
-1.00923	11.4099	-3.10415	0.00365498	0.0102674	-2.88284	MMAA	Down
-1.00914	16.5547	-3.99539	0.000296676	0.0012423	-0.483097	RNPEP	Down
-1.00862	10.2743	-4.83115	2.38945102297804e-05	0.000146737	1.97355	SBSPON	Down
-1.00815	15.7396	-9.20784	4.26555163897788e-11	1.81938835213546e-09	15.1409	REEP5	Down
-1.00642	17.6444	-8.03062	1.28772122261607e-09	3.33636862223253e-08	11.7349	CDC42BPB	Down
-1.00599	12.4997	-2.57866	0.014045	0.031654	-4.13207	CLMN	Down
-1.00537	16.9036	-3.19961	0.00282732	0.00824909	-2.64089	HMGA1	Down
-1.00305	10.137	-4.36806	9.78222117552444e-05	0.000484858	0.594552	EPHX4	Down
-1.00171	11.3708	-2.36559	0.0233701	0.0484077	-4.59345	FNBP1	Down
-1.00143	10.7125	-3.89558	0.00039738	0.00159819	-0.765533	SYTL4	Down
-1.00106	14.757	-3.5751	0.000998676	0.00343672	-1.65136	EPHA2	Down
-1.00046	11.6731	-2.521	0.0161565	0.0355693	-4.25972	NGLY1	Down
1.00222	13.1132	6.43323	1.6532662470772e-07	2.16861493078955e-06	6.8931	EXOSC5	Up
1.00296	11.4511	4.70274	3.54173192414376e-05	0.000203407	1.58757	EXOSC1	Up
1.00302	13.2993	4.48447	6.88240099076219e-05	0.000358113	0.937615	MBD3	Up
1.00492	13.5883	5.29094	5.77172164971812e-06	4.4186440468538e-05	3.3719	SOX9	Up
1.0063	15.3161	4.03528	0.000263802	0.00112443	-0.369418	GTF3C4	Up
1.00677	13.8822	5.09717	1.05224506668713e-05	7.34696722508717e-05	2.77992	EXOSC2	Up
1.00814	14.2485	5.72623	1.48992973122424e-06	1.41329189330953e-05	4.71073	SNRPB	Up
1.00864	11.4383	3.44532	0.00143842	0.00468071	-1.99977	APOBEC3B	Up
1.00867	13.1387	6.94135	3.44997376565306e-08	5.57508647181564e-07	8.45329	DDX10	Up
1.00916	12.8272	4.45555	7.51215349488e-05	0.000387027	0.852123	TIMM17B	Up
1.01027	12.0575	2.64029	0.012071	0.0278972	-3.99346	WNT11	Up
1.0112	13.2276	6.13981	4.11098553884922e-07	4.78216685131439e-06	5.98779	TMEM70	Up
1.0115	12.7746	3.687	0.000726172	0.00262578	-1.34595	SIRT5	Up
1.01155	12.2087	4.78299	2.7700757754507e-05	0.000166364	1.8285	NCAPG	Up
1.0117	12.6961	6.86034	4.4241904703079e-08	6.93491856220763e-07	8.20544	MEPCE	Up
1.01207	12.7727	9.04661	6.73432747864842e-11	2.67241982855225e-09	14.6844	POLR1E	Up
1.01351	12.2383	3.3951	0.00165423	0.00527034	-2.13286	SFT2D3	Up
1.01437	12.3214	9.60928	1.38823203219552e-11	7.07659743241131e-10	16.2631	VARS2	Up
1.01451	13.1928	4.3795	9.45087642802947e-05	0.000471352	0.628144	POLR3D	Up
1.01516	11.8544	3.17649	0.00300969	0.00870724	-2.69988	HMBOX1	Up
1.01524	11.8317	3.09493	0.003746	0.0104808	-2.90597	GDPD1	Up
1.01562	11.9758	3.7963	0.000530203	0.00201722	-1.04354	ABCC4	Up
1.01683	11.8955	4.47333	7.11868657563477e-05	0.000368573	0.904649	MRPL12	Up
1.01927	11.1412	2.43803	0.0197063	0.0420695	-4.43979	GK	Up
1.01951	12.8011	4.01912	0.000276665	0.00116972	-0.415513	NDRG3	Up
1.02128	11.3063	4.42214	8.31034235445919e-05	0.000420548	0.753575	MRM1	Up
1.02227	12.556	4.08952	0.000224747	0.000979948	-0.214168	MORF4L2	Up
1.02396	14.1343	2.41493	0.0208137	0.0440579	-4.48916	DECR2	Up
1.02597	11.3325	3.0603	0.00410766	0.0113458	-2.99254	DHRS11	Up
1.02684	12.1139	6.11727	4.40957912471369e-07	5.03607670527411e-06	5.91817	RAVER1	Up
1.02803	13.1718	4.9119	1.86405148567926e-05	0.000118776	2.21742	RTF2	Up
1.0283	13.5289	3.76504	0.000580299	0.00217873	-1.13044	URB2	Up
1.03255	14.035	2.58675	0.0137699	0.0311913	-4.114	SCARB1	Up
1.03288	10.7698	4.12248	0.000203835	0.000903882	-0.119445	MLX	Up
1.03318	14.9185	9.95134	5.42241902071889e-12	3.1137278955021e-10	17.2028	RPRD1B	Up
1.03386	11.5988	3.27427	0.00230755	0.00694926	-2.44879	NRM	Up
1.03401	14.3059	6.0119	6.12049784285173e-07	6.63936357693432e-06	5.59272	NDC1	Up
1.03419	11.2376	4.346	0.000104536	0.000514415	0.529863	JADE3	Up
1.03455	12.041	4.81378	2.52041045333399e-05	0.000153875	1.92118	POLR3F	Up
1.03514	10.9182	4.4855	6.8610976551514e-05	0.000357301	0.940642	FGFR4	Up
1.03623	12.4873	4.76128	2.96069598035925e-05	0.000175293	1.76323	IGSF3	Up
1.03954	11.9108	4.37928	9.45711840110137e-05	0.000471352	0.6275	MEN1	Up
1.04121	11.9526	3.51486	0.00118375	0.00397967	-1.81388	TRMT11	Up
1.04258	14.0302	6.11238	4.47711454659115e-07	5.08541815346495e-06	5.90308	RNF113A	Up
1.04331	13.1584	3.24064	0.0025293	0.00752668	-2.53563	ORC2	Up
1.04403	12.1853	4.2638	0.000133778	0.000634003	0.289714	NOSIP	Up
1.04479	13.2031	7.09736	2.14004724205382e-08	3.73763125562045e-07	8.92934	TFB1M	Up
1.04498	12.6731	8.61668	2.31214268454214e-10	8.00946664755759e-09	13.4512	STAG2	Up
1.04546	11.7638	5.36864	4.53413417274424e-06	3.64942506586732e-05	3.61011	CCNL1	Up
1.04715	11.6893	5.15519	8.7925850883518e-06	6.29332288858057e-05	2.95684	NOA1	Up
1.04946	11.4003	2.86226	0.00689382	0.0174502	-3.47617	SEPTIN6	Up
1.05085	12.2499	2.98971	0.00494937	0.0132448	-3.1672	NRF1	Up
1.05249	11.3344	4.76493	2.92774616169365e-05	0.000174	1.7742	CTU1	Up
1.05343	12.2002	3.52016	0.00116622	0.00392916	-1.79963	SLC25A19	Up
1.05582	11.7535	5.65724	1.84708436359036e-06	1.70562871277048e-05	4.49798	NSMCE2	Up
1.05819	12.086	6.22628	3.14216691453663e-07	3.80335647763411e-06	6.25475	TELO2	Up
1.0606	16.6972	2.70309	0.0103253	0.0244855	-3.84991	CEBPZ	Up
1.06087	11.9871	5.30998	5.4403148225254e-06	4.23210594754768e-05	3.43025	TTI2	Up
1.06159	12.1257	4.83861	2.33532415432108e-05	0.000143554	1.99604	NUDCD2	Up
1.06279	11.0857	4.20336	0.000160249	0.000734475	0.114156	ZWILCH	Up
1.06515	14.5309	5.22923	6.98982789711091e-06	5.18704024026128e-05	3.18301	SERPINH1	Up
1.06682	11.739	4.8121	2.53341933086894e-05	0.000154219	1.91613	VRK3	Up
1.06943	13.3653	3.80875	0.000511444	0.00196252	-1.00885	WAC	Up
1.07002	16.5429	10.9934	3.39822397143606e-13	2.63047707418569e-11	19.9696	HSPH1	Up
1.07038	12.2351	5.02582	1.31185817297699e-05	8.80658537962068e-05	2.56285	OARD1	Up
1.07047	13.4484	5.00147	1.41430758038938e-05	9.34426610014903e-05	2.48888	CNIH4	Up
1.07297	12.3769	4.16715	0.0001785	0.000806918	0.00937862	SLC25A17	Up
1.07318	11.2139	5.0305	1.29301840599965e-05	8.70808314244661e-05	2.57709	PCIF1	Up
1.07334	13.4371	4.07816	0.000232429	0.00100993	-0.246749	UBAC2	Up
1.07443	11.8845	3.41437	0.00156799	0.00503937	-2.08191	SYT7	Up
1.07609	13.0399	4.11836	0.000206344	0.000912395	-0.131314	TMEM68	Up
1.0763	11.2947	5.15299	8.8525908403408e-06	6.32183878917275e-05	2.95013	HUS1	Up
1.07766	12.9351	7.69563	3.49648116474414e-09	8.01864547350628e-08	10.7372	SIN3A	Up
1.08066	11.7289	2.54106	0.015391	0.0341357	-4.21554	NOX1	Up
1.08079	13.7728	3.86914	0.000429198	0.00169677	-0.83986	XPO4	Up
1.08127	14.698	4.44721	7.70411051259222e-05	0.000393682	0.827493	DCTPP1	Up
1.08519	11.891	4.79581	2.66325051949077e-05	0.000161495	1.86709	KIFBP	Up
1.08683	14.5104	2.96465	0.00528541	0.0139888	-3.22861	SLC2A1	Up
1.08691	11.6997	2.67791	0.0109952	0.0258589	-3.90774	MYADM	Up
1.08795	13.8971	3.06999	0.00400335	0.0111066	-2.96839	PALD1	Up
1.08878	12.6055	6.49181	1.37896364194536e-07	1.87145065692585e-06	7.07357	PSMG3	Up
1.09996	11.4788	3.96456	0.000324782	0.00134061	-0.570642	SMTN	Up
1.10294	12.3845	5.40412	4.06070578539112e-06	3.33254257518355e-05	3.71902	CCNK	Up
1.11352	13.8411	7.61019	4.51951677214035e-09	1.00337574146823e-07	10.4809	PHF8	Up
1.11421	13.2978	6.04709	5.48561208255415e-07	6.02360556175386e-06	5.70141	TBC1D4	Up
1.11604	13.2166	11.1147	2.48369449317142e-13	1.97123600913732e-11	20.2825	DCAF13	Up
1.11649	12.4986	4.27375	0.00012985	0.000617724	0.318707	HIRIP3	Up
1.11711	14.1906	6.96157	3.24262388750113e-08	5.28084461678756e-07	8.51506	DDX52	Up
1.11917	13.8798	5.65298	1.87176785706267e-06	1.72588006820337e-05	4.48484	MSH2	Up
1.12092	12.9572	4.47603	7.06076988189269e-05	0.000365876	0.912627	POLD3	Up
1.12528	12.6368	6.19197	3.49567082902478e-07	4.18279696526438e-06	6.14883	NTHL1	Up
1.12821	12.5551	9.54962	1.63811907302641e-11	8.15159253006001e-10	16.0977	SMC6	Up
1.13145	14.1537	6.92314	3.64818797482772e-08	5.8651637441461e-07	8.39761	CUL4A	Up
1.13216	11.9463	2.44148	0.0195455	0.0417976	-4.43239	REEP4	Up
1.13336	16.0964	7.23708	1.39769990878519e-08	2.63170523365859e-07	9.3542	CSE1L	Up
1.13444	10.9721	4.37358	9.62092232858553e-05	0.000478755	0.610759	YBX2	Up
1.13468	11.5047	3.91026	0.000380714	0.00153608	-0.724168	LCK	Up
1.13664	11.9493	2.70188	0.0103565	0.0245316	-3.85269	CHAF1A	Up
1.13665	11.7188	3.92416	0.000365563	0.00148451	-0.68495	KALRN	Up
1.13671	14.0137	6.74914	6.22891142750979e-08	9.18947638834973e-07	7.86464	PYCR2	Up
1.14008	12.6022	14.0969	1.98636736389363e-16	4.68758188733473e-14	27.3782	PRMT3	Up
1.14461	15.0526	5.40427	4.05879589506627e-06	3.33254257518355e-05	3.71949	ATP1B3	Up
1.14558	12.7368	4.51817	6.21412273832868e-05	0.000328521	1.0374	HDAC6	Up
1.14635	13.0124	3.98716	0.00030394	0.00126709	-0.506498	MRM3	Up
1.14735	12.2698	8.17266	8.46219503627599e-10	2.34777258612254e-08	12.1544	KNTC1	Up
1.14803	12.1077	4.64814	4.18448329453156e-05	0.000235518	1.42421	FKBP7	Up
1.15293	11.4214	4.25769	0.000136246	0.000643757	0.271924	NUP43	Up
1.15332	13.4296	7.15425	1.79891198149596e-08	3.22262232113705e-07	9.1025	LRWD1	Up
1.15429	11.9479	3.33315	0.00196324	0.00607279	-2.29559	SHROOM2	Up
1.15439	12.5328	3.46301	0.00136904	0.00448712	-1.95265	MCM3AP	Up
1.15998	13.9655	3.83867	0.000468945	0.00182287	-0.925264	SMN1	Up
1.16547	12.4299	4.73369	3.22173723377995e-05	0.00018826	1.68038	TRIM24	Up
1.16552	13.1899	4.09295	0.000222474	0.000970712	-0.204312	CLYBL	Up
1.16921	12.7032	3.50959	0.0012014	0.00401747	-1.82801	POM121C	Up
1.16927	15.1164	3.0994	0.00370163	0.0103752	-2.89477	BAZ1B	Up
1.17005	11.9786	3.68189	0.000736885	0.00265685	-1.36001	SPATA13	Up
1.17134	11.3883	5.0539	1.2028623431075e-05	8.22458766770337e-05	2.64822	UCK2	Up
1.17249	15.0957	11.1938	2.02688359351392e-13	1.62930258094004e-11	20.4853	VAPB	Up
1.17405	11.602	5.4531	3.48697889410004e-06	2.94257842072776e-05	3.86951	KAT8	Up
1.17448	13.2093	3.31822	0.00204559	0.00629701	-2.33458	COMTD1	Up
1.17591	11.8828	4.08058	0.00023077	0.00100411	-0.239803	GPAT4	Up
1.17956	13.2553	5.81439	1.13214400075136e-06	1.11788076924583e-05	4.98279	PTDSS1	Up
1.18113	14.1856	4.62076	4.54873821843033e-05	0.000252618	1.34251	DHX16	Up
1.18207	11.0909	4.92875	1.7697624402702e-05	0.000113344	2.26843	AGMAT	Up
1.18334	12.3484	5.47868	3.22024871655952e-06	2.74706931330996e-05	3.94816	NAA16	Up
1.18505	11.2082	2.8241	0.00760274	0.0189389	-3.56704	PEG10	Up
1.18553	12.1169	5.3389	4.97301136942724e-06	3.92458260069971e-05	3.51889	DDX19A	Up
1.18605	12.7071	4.91131	1.86743512090714e-05	0.000118871	2.21564	CHTF18	Up
1.18966	13.8511	2.95855	0.00537036	0.0141718	-3.2435	PAXIP1	Up
1.19077	11.4606	5.2087	7.44919072561446e-06	5.46273986545061e-05	3.12025	CSTF2	Up
1.19141	14.7048	3.60951	0.000905805	0.00316225	-1.55791	RBM12	Up
1.19259	15.0874	8.8334	1.23801552932789e-10	4.53939027420227e-09	14.0756	FEN1	Up
1.19576	12.4934	3.71919	0.000662158	0.00242508	-1.25732	CYBC1	Up
1.19953	11.7811	8.72199	1.70559815442451e-10	6.04186464872412e-09	13.7553	ZMYM3	Up
1.20062	11.4524	4.36927	9.7465350195919e-05	0.000483471	0.598114	ZNRD2	Up
1.20274	13.9032	4.31341	0.000115289	0.000557763	0.434489	UCHL3	Up
1.20324	11.6617	3.28702	0.00222844	0.00675643	-2.41575	SUPT3H	Up
1.2048	11.1117	3.14177	0.0033046	0.00942239	-2.788	TUBB2B	Up
1.20515	13.3432	4.94433	1.68685879472852e-05	0.000108701	2.31559	HMGN2;HMGN3	Up
1.20559	15.6923	5.27669	6.03267660524062e-06	4.60156719158865e-05	3.32827	TOMM34	Up
1.20632	11.2082	3.00056	0.00481018	0.0129289	-3.14051	CDCA7	Up
1.20771	11.1844	4.12247	0.000203842	0.000903882	-0.11948	SLC31A1	Up
1.21031	12.6319	7.36269	9.54375805116044e-09	1.86596810962345e-07	9.73485	RFC3	Up
1.2104	12.9093	3.95656	0.000332491	0.00136703	-0.593319	SLC1A4	Up
1.2132	11.7507	2.68009	0.0109354	0.0257377	-3.90274	C19orf53	Up
1.21379	12.4148	4.59766	4.88039288336255e-05	0.000267952	1.27364	STEEP1	Up
1.21391	12.4177	3.69802	0.000703609	0.00255746	-1.31564	GPR107	Up
1.21706	11.416	4.64074	4.28002223659348e-05	0.000240248	1.40211	BACC1	Up
1.21785	11.8653	3.2047	0.00278864	0.00814382	-2.62788	SLC38A1	Up
1.22192	12.5333	7.95268	1.62284418930297e-09	4.07009322677184e-08	11.5038	MORF4L1	Up
1.2234	11.4811	3.86282	0.000437173	0.0017207	-0.857617	CHRAC1	Up
1.22386	11.7694	4.51071	6.3563491035157e-05	0.000334068	1.01529	MEAF6	Up
1.22484	13.7797	6.15364	3.93797378854582e-07	4.59796939556468e-06	6.03049	MAGED2	Up
1.22744	15.0396	5.73176	1.46448493698409e-06	1.39337185961916e-05	4.72779	OAT	Up
1.2284	11.7514	5.13245	9.43387783051484e-06	6.69122330286516e-05	2.88748	WDR89	Up
1.22864	10.8479	3.80212	0.000521357	0.00199081	-1.02734	OBI1	Up
1.23254	15.5856	6.17593	3.67435016425629e-07	4.33863945948907e-06	6.09931	TMCO1	Up
1.23544	11.1831	2.41411	0.0208541	0.0440847	-4.49091	CAPN6	Up
1.23953	14.0662	4.55096	5.62523648481781e-05	0.000302749	1.13472	HSPBP1	Up
1.24501	15.6834	2.90066	0.00624331	0.0160433	-3.38397	HSP90AB2P	Up
1.24705	14.5421	8.15523	8.908574159069e-10	2.43915982433898e-08	12.1031	CHORDC1	Up
1.24807	12.194	5.0151	1.35602854092089e-05	9.05463147132481e-05	2.53027	IFI30	Up
1.25039	15.0864	5.64111	1.94223031715593e-06	1.77260321522091e-05	4.44826	MYBBP1A	Up
1.25041	12.7425	2.54214	0.0153508	0.0340587	-4.21316	PLIN2	Up
1.25113	13.381	5.35618	4.71309482522338e-06	3.75490528006996e-05	3.57189	RAE1	Up
1.25503	11.9546	6.54328	1.17595399128333e-07	1.62764492833255e-06	7.23202	DDX28	Up
1.25696	13.9541	4.96898	1.56338977113248e-05	0.000101685	2.39032	ZCCHC9	Up
1.25747	13.605	3.95772	0.000331366	0.0013633	-0.590042	DCUN1D5	Up
1.25912	12.5483	4.16974	0.000177132	0.000802468	0.0168516	ZFC3H1	Up
1.2619	11.8971	5.29328	5.72998430195432e-06	4.39819226732611e-05	3.37906	ALG8	Up
1.26222	10.9194	3.74953	0.000606828	0.00226208	-1.17344	DDC	Up
1.26269	13.3914	6.7119	6.98642909753717e-08	1.01871884747809e-06	7.75035	TRIP13	Up
1.26359	15.289	2.42113	0.0205111	0.0435062	-4.47594	ANXA6	Up
1.26462	11.9956	4.61723	4.59799864195971e-05	0.000254902	1.33196	RPP14	Up
1.26943	13.1974	3.16602	0.00309582	0.00890813	-2.72649	TARBP1	Up
1.27	12.572	10.9385	3.91744926328968e-13	2.94090317065952e-11	19.8276	GPKOW	Up
1.27084	12.9456	5.79937	1.18636017160649e-06	1.16408110735097e-05	4.93644	KIF23	Up
1.27445	12.7415	4.73069	3.25142527397324e-05	0.00018932	1.67139	TMEM120A	Up
1.27501	11.123	7.32199	1.07977468611536e-08	2.08313454829024e-07	9.61167	MRGBP	Up
1.27601	12.5289	6.06359	5.21103312900687e-07	5.80340634438243e-06	5.75238	RACGAP1	Up
1.27805	13.0438	4.6948	3.62872783878676e-05	0.000207972	1.56379	RAB5IF	Up
1.27853	13.4079	4.04375	0.000257292	0.00110193	-0.34522	LIG1	Up
1.27872	11.8157	3.12519	0.00345486	0.00979293	-2.82987	CDC42EP4	Up
1.27879	11.8239	5.42798	3.77038109903121e-06	3.13531690861084e-05	3.7923	C8orf33	Up
1.28081	11.1398	3.31639	0.00205593	0.00631896	-2.33936	ARID3B	Up
1.2869	12.7749	3.56587	0.00102508	0.00351215	-1.67632	ANKS4B	Up
1.28761	13.9748	7.21717	1.48502324085451e-08	2.74332901597318e-07	9.29375	RFC5	Up
1.28889	12.3707	11.2303	1.84627285020838e-13	1.56434199605494e-11	20.5785	MCMBP	Up
1.28923	11.3474	3.30688	0.00211034	0.0064514	-2.36414	AQP3	Up
1.2895	11.6723	2.99331	0.00490284	0.0131315	-3.15836	LMF1	Up
1.29019	14.381	5.38932	4.25183798788313e-06	3.4667131578709e-05	3.67359	CD81	Up
1.29054	11.0554	3.64938	0.000808605	0.00287739	-1.44912	STON2	Up
1.29598	13.5018	3.62237	0.000873285	0.00306407	-1.52288	VAMP7	Up
1.29881	13.2156	5.54173	2.6465432956279e-06	2.31434120831059e-05	4.14214	PLEK2	Up
1.30069	13.3942	3.82546	0.000487265	0.00188241	-0.962196	POLR2E	Up
1.30132	13.4868	6.77469	5.75770022775567e-08	8.55468730521991e-07	7.94299	NSUN5	Up
1.30347	11.4629	5.64247	1.93402389412646e-06	1.7702671264486e-05	4.45245	MTG2	Up
1.30502	13.1098	4.65308	4.12183661161313e-05	0.000232828	1.43898	RB1	Up
1.30646	15.8795	10.1432	3.22146965634411e-12	1.94217449473823e-10	17.7231	IGF2BP2	Up
1.30857	12.2607	5.61935	2.07844492616545e-06	1.89172854847652e-05	4.38118	PYCR3	Up
1.31324	13.1935	6.56595	1.09632663495039e-07	1.52754844469754e-06	7.30179	DNMT1	Up
1.31431	12.0273	4.58339	5.09699465725666e-05	0.000278381	1.23116	ALG6	Up
1.31773	14.7841	6.1321	4.21084702953101e-07	4.86224877995569e-06	5.96396	THYN1	Up
1.31783	11.5953	6.15809	3.88394896996058e-07	4.55184299843978e-06	6.04421	RPUSD2	Up
1.31999	12.9188	3.61374	0.00089498	0.00313318	-1.54639	GLA	Up
1.32224	14.6417	5.25218	6.50944495982315e-06	4.91737589133629e-05	3.25323	PCNA	Up
1.32284	14.4923	6.7829	5.61385543599428e-08	8.42078315399142e-07	7.96819	ORC3	Up
1.3268	14.1509	4.73841	3.17548318158223e-05	0.000186251	1.69456	ALG5	Up
1.32901	13.3743	7.22281	1.45974956830572e-08	2.70787863706416e-07	9.31087	URB1	Up
1.33137	13.4025	5.05917	1.18343580690662e-05	8.1094453653601e-05	2.66424	SQLE	Up
1.33575	11.2107	5.78159	1.25391593774524e-06	1.22252748597987e-05	4.88156	SLC29A2	Up
1.33643	12.9035	3.70395	0.00069176	0.00251878	-1.29933	MAU2	Up
1.33764	13.419	8.42759	4.00632290299009e-10	1.23742091634226e-08	12.9017	TCEAL4	Up
1.33913	13.5867	7.59201	4.77355618489541e-09	1.04510586636153e-07	10.4263	RFC4	Up
1.34044	12.8319	3.65964	0.000785275	0.00280391	-1.42104	CMTR1	Up
1.34298	14.022	4.82753	2.41619980369935e-05	0.00014809	1.96262	RIF1	Up
1.34337	12.5179	5.47722	3.23494670376175e-06	2.75585812942747e-05	3.94366	MGME1	Up
1.34672	12.1423	4.1126	0.000209898	0.000924199	-0.14788	ARID3A	Up
1.34783	13.0552	7.31084	1.11696422753799e-08	2.14827168916049e-07	9.57788	XPO5	Up
1.35033	11.3992	5.59765	2.22371790029794e-06	2.00038898635123e-05	4.31433	XPO6	Up
1.35053	14.4182	9.93448	5.67749118940867e-12	3.17838122835646e-10	17.1568	PDS5B	Up
1.35227	11.5685	3.80843	0.000511916	0.00196313	-1.00974	SERPINE2	Up
1.35537	13.7246	10.4239	1.51715096955259e-12	1.0339713672929e-10	18.4755	CELF1	Up
1.3586	11.3222	3.66285	0.000778107	0.00278466	-1.41224	CHAF1B	Up
1.36108	11.716	5.21826	7.23167958877904e-06	5.33592100234027e-05	3.14947	KDELR2	Up
1.36115	12.6082	3.22371	0.00264845	0.00779248	-2.57915	NSMCE4A	Up
1.36117	13.5137	4.3708	9.70177527872477e-05	0.000481632	0.602601	RRM1	Up
1.36293	11.833	5.95262	7.36089596224193e-07	7.79608406811772e-06	5.40964	UPF3A	Up
1.36461	12.5655	3.89159	0.000402036	0.00161174	-0.776776	HDAC4	Up
1.37245	14.539	8.25837	6.5755430103706e-10	1.90873401273258e-08	12.4065	MPDU1	Up
1.37753	11.6899	5.67243	1.76174003999317e-06	1.63888873156634e-05	4.5448	DHX33	Up
1.37846	11.8082	3.29691	0.00216888	0.00660196	-2.39008	TRAPPC6A	Up
1.39008	11.4952	4.08309	0.000229062	0.000998066	-0.232603	KIF11	Up
1.39129	11.4644	6.0535	5.37720492977429e-07	5.93575262494451e-06	5.72122	RRP36	Up
1.39443	12.6978	11.9125	3.31605523349424e-14	3.58477005413946e-12	22.2907	DDX49	Up
1.39834	12.3931	2.98726	0.00498135	0.0133076	-3.17322	EPHX2	Up
1.406	11.1838	3.99259	0.000299128	0.00125119	-0.49106	FBXL6	Up
1.40706	12.8952	3.06703	0.00403489	0.0111744	-2.97576	SATB2	Up
1.40718	11.5117	4.82076	2.4669296634903e-05	0.000150757	1.94223	POLA1	Up
1.41004	13.658	7.86108	2.13166324436961e-09	5.10134677183108e-08	11.2314	MACROD1	Up
1.41147	11.3261	6.0497	5.44108910920459e-07	5.9957168215664e-06	5.7095	TAF4	Up
1.41317	12.0259	3.94408	0.000344869	0.0014096	-0.628649	MYO1A	Up
1.42398	12.4533	9.0652	6.38789163393509e-11	2.56744106056237e-09	14.7372	UTP23	Up
1.42801	11.0091	5.54489	2.62066394655578e-06	2.29812069159507e-05	4.15186	KHK	Up
1.44784	12.294	5.48138	3.19332994061137e-06	2.72781726534513e-05	3.95645	PLCG1	Up
1.44794	12.4551	3.83191	0.000478239	0.00185211	-0.944179	VAV2	Up
1.44842	11.209	3.01069	0.00468357	0.012641	-3.11554	ST6GAL1	Up
1.45934	12.0411	3.51264	0.00119115	0.00399172	-1.81984	FANCD2	Up
1.46678	11.5996	3.1349	0.00336608	0.00956723	-2.80536	FAM133B	Up
1.46841	11.5299	7.01244	2.77472238704708e-08	4.66421162648396e-07	8.67039	CYBA	Up
1.47813	12.4303	5.18059	8.12737045715565e-06	5.86544911554565e-05	3.03436	USH1C	Up
1.48593	11.239	4.9015	1.92471525460365e-05	0.000121899	2.18595	PCK1	Up
1.4869	11.5708	4.01262	0.000282015	0.00118594	-0.434053	METTL5	Up
1.49543	11.2503	6.55335	1.13990719628022e-07	1.58124294705243e-06	7.263	AURKA	Up
1.50086	11.0865	5.09299	1.06591735660367e-05	7.42589091767226e-05	2.76721	RNASEH2A	Up
1.50115	11.7428	4.84593	2.28340007897209e-05	0.000140776	2.01812	GPR89A;GPR89B	Up
1.50201	11.4943	4.43783	7.92565760317683e-05	0.000403359	0.799823	NDC80	Up
1.50251	11.155	5.3387	4.97614540280106e-06	3.92458260069971e-05	3.51827	PLK1	Up
1.50522	12.2077	4.58174	5.12273464117836e-05	0.000279465	1.22623	SMOC1	Up
1.51115	11.3757	4.81252	2.53016672316833e-05	0.000154171	1.91739	TPPP3	Up
1.51264	14.0625	3.2794	0.0022754	0.00687553	-2.4355	IGF2BP3	Up
1.5167	12.8199	3.87828	0.000417935	0.00166204	-0.814204	NME1	Up
1.51987	13.3191	3.77284	0.000567379	0.00213405	-1.10877	WDR4	Up
1.52439	12.2024	5.94302	7.58440202234428e-07	7.99247197138088e-06	5.37997	PM20D2	Up
1.52486	12.1646	9.50049	1.87794574093120e-11	9.1989998403427e-10	15.9611	NEK3	Up
1.52862	13.6265	4.73687	3.19056042964219e-05	0.000186786	1.68991	TTI1	Up
1.52992	11.5373	4.31507	0.000114719	0.000555435	0.439314	PALM2AKAP2	Up
1.53126	11.1933	5.45907	3.42285909957497e-06	2.89626539194805e-05	3.88785	CEP41	Up
1.54258	12.6457	3.85622	0.000445641	0.00174636	-0.876121	SDHD	Up
1.54457	13.7796	3.2258	0.00263343	0.00775194	-2.57378	NOTCH1	Up
1.54553	11.7565	5.90173	8.62501954408785e-07	8.93865661841832e-06	5.25246	PERP	Up
1.54645	12.7083	6.42177	1.71304501281642e-07	2.22376650732069e-06	6.85778	MT-CYB	Up
1.55341	13.1326	5.20291	7.58398279640163e-06	5.54424378934246e-05	3.10258	TMEM97	Up
1.55741	11.0729	4.88475	2.02652538692046e-05	0.000127573	2.13532	CKAP2	Up
1.5585	11.0591	7.48461	6.59904958104464e-09	1.37006757858112e-07	10.1031	BUD23	Up
1.56496	11.5824	4.95908	1.61187935105263e-05	0.000104083	2.36028	RSBN1L	Up
1.56526	11.468	6.78651	5.55193192311966e-08	8.37222235701064e-07	7.97924	RPP25	Up
1.5654	11.3782	4.53982	5.81893413333546e-05	0.000311249	1.10162	BMP7	Up
1.57209	11.3661	6.27284	2.71904110863937e-07	3.36260113435283e-06	6.39846	CDYL	Up
1.57297	11.9863	5.10421	1.02957240169124e-05	7.22082657561978e-05	2.80137	METTL16	Up
1.57967	11.4775	5.19419	7.79191986273824e-06	5.67425523105328e-05	3.07591	SLC27A3	Up
1.5845	12.0711	5.30018	5.60848760501606e-06	4.33603172422327e-05	3.40021	COL6A1	Up
1.58524	13.3915	3.72391	0.000653232	0.00239799	-1.24427	PMVK	Up
1.58878	11.5412	6.42281	1.70749593124076e-07	2.22116171968455e-06	6.861	POLRMT	Up
1.58915	12.0489	5.22985	6.97636202407173e-06	5.18704024026128e-05	3.18491	CTU2	Up
1.59071	12.9947	3.40605	0.00160466	0.00513327	-2.10392	SERINC5	Up
1.60538	12.4395	4.50723	6.42382096084886e-05	0.000336767	1.00497	NSMCE1	Up
1.61613	11.3201	7.40006	8.52187782779671e-09	1.70166159172883e-07	9.84786	NOM1	Up
1.62451	12.999	7.44037	7.54311429940688e-09	1.52565569862197e-07	9.96962	FKBP11	Up
1.62704	11.6114	6.52104	1.25971117789024e-07	1.728312710147e-06	7.16356	SLCO4A1	Up
1.62726	11.6379	7.23104	1.42365047438528e-08	2.67068308641647e-07	9.33585	PNKP	Up
1.6274	10.984	4.23739	0.000144771	0.000676388	0.212901	CCNB1	Up
1.63445	11.7614	3.88148	0.000414055	0.00165106	-0.805206	KCTD14	Up
1.63775	12.7139	3.86133	0.000439066	0.00172598	-0.861785	UBAP2	Up
1.63947	13.8386	3.86813	0.000430464	0.00170066	-0.842701	PHKA2	Up
1.64	13.1306	4.6775	3.82567233585724e-05	0.000218063	1.51201	TSPAN6	Up
1.65529	15.7047	7.45167	7.28984029644062e-09	1.49859995602238e-07	10.0037	CPNE1	Up
1.65622	12.428	5.36253	4.62098872554295e-06	3.70033196796351e-05	3.59138	FOXK1	Up
1.66489	12.2692	4.62261	4.5232407992693e-05	0.000251425	1.34801	FAM210A	Up
1.66704	11.7142	8.47078	3.53226210003527e-10	1.15044042826282e-08	13.0276	KIN	Up
1.6827	14.2939	3.35039	0.00187213	0.00584283	-2.25048	CPPED1	Up
1.68333	13.6225	3.78262	0.000551583	0.0020859	-1.0816	MTHFS	Up
1.69118	13.0605	4.004	0.000289259	0.00121396	-0.458599	GAA	Up
1.69179	11.3802	4.07229	0.000236495	0.00102396	-0.263557	CTDSPL2	Up
1.69284	11.38	3.63072	0.000852783	0.00300053	-1.50012	CD320	Up
1.70356	14.25	4.63135	4.40425701793589e-05	0.000245682	1.3741	SFXN4	Up
1.70375	11.8515	3.73003	0.000641843	0.00236866	-1.22737	MTARC1	Up
1.70829	13.8348	5.59611	2.23436356495921e-06	2.00708589574416e-05	4.3096	ROMO1	Up
1.70909	17.2072	2.53797	0.0155068	0.0343318	-4.22237	METTL3	Up
1.71943	11.2007	5.32435	5.20291897022881e-06	4.08289135711322e-05	3.47428	HPDL	Up
1.73926	11.3688	7.57281	5.05772744466637e-09	1.09729934526153e-07	10.3686	POLE	Up
1.74236	12.6219	6.03911	5.62343672509411e-07	6.16415179481469e-06	5.67678	KPNA2	Up
1.74261	11.6644	8.27266	6.30532767048071e-10	1.85607532835277e-08	12.4485	RIOX2	Up
1.74534	11.8881	5.94742	7.48105529355677e-07	7.90998595119746e-06	5.39358	PON3	Up
1.76187	12.775	4.28938	0.00012391	0.00059397	0.364282	PIR	Up
1.76739	11.5456	5.54074	2.65473541456099e-06	2.31504743383831e-05	4.13908	FCGRT	Up
1.77086	11.9874	5.74848	1.39015583989341e-06	1.3368523184251e-05	4.77938	POLR3C	Up
1.77548	12.8675	12.24	1.48483591860208e-14	1.76840323842523e-12	23.0912	POFUT1	Up
1.78651	12.2093	6.12408	4.31719454272102e-07	4.96991142299642e-06	5.93919	SLC29A1	Up
1.79217	11.423	3.22698	0.00262503	0.00773082	-2.57076	CBS	Up
1.79736	12.9997	5.57951	2.35292420785361e-06	2.08963665485016e-05	4.25845	DUS3L	Up
1.81022	12.2798	5.89323	8.85641200991232e-07	9.08833114601477e-06	5.22621	WDHD1	Up
1.82723	11.7053	9.14422	5.10585982080618e-11	2.10616717608255e-09	14.9611	ERAL1	Up
1.83158	11.9381	5.07813	1.11606143442383e-05	7.71522072087919e-05	2.72194	HIP1	Up
1.84119	11.4231	8.13329	9.50444466645917e-10	2.5686581059784e-08	12.0384	INCENP	Up
1.86322	11.3593	4.7079	3.4861967679717e-05	0.000200536	1.60305	GMNN	Up
1.86487	12.0524	3.48081	0.00130249	0.00429821	-1.90513	PLPP3	Up
1.87986	11.6007	6.1801	3.62702748687785e-07	4.2989531838798e-06	6.11219	ARRB2	Up
1.88805	11.3604	6.0665	5.16407170289304e-07	5.76133978240914e-06	5.76136	STAP2	Up
1.88967	14.8335	6.36691	2.03059611975653e-07	2.61434038416292e-06	6.68867	MKI67	Up
1.89326	12.3264	4.41334	8.53410828108773e-05	0.00042979	0.727653	CLK3	Up
1.90106	12.6213	5.54778	2.59716174066766e-06	2.28389959522948e-05	4.16077	HNF4A	Up
1.9069	13.0074	5.67039	1.77298971647776e-06	1.64447418969165e-05	4.5385	SLC25A15	Up
1.913	11.5114	2.93581	0.00569863	0.0148815	-3.29889	GSTT2;GSTT2B	Up
1.91454	12.1474	8.16086	8.76166090782401e-10	2.4094567496516e-08	12.1197	KIF4A	Up
1.91511	11.5884	9.33264	3.00232148195858e-11	1.34461112084859e-09	15.492	DPAGT1	Up
1.91539	11.5147	4.15593	0.000184559	0.000828927	-0.0230302	MAP7D2	Up
1.93013	15.0219	4.68508	3.73810487510349e-05	0.000213776	1.53469	HMGA2	Up
1.94623	12.5212	8.43678	3.90031441605409e-10	1.22274856943296e-08	12.9285	ALG3	Up
1.95465	11.504	8.08665	1.0908662480231e-09	2.89774907078045e-08	11.9007	ZCCHC3	Up
1.95472	11.3014	4.853	2.23435853061536e-05	0.000138024	2.03943	DLGAP5	Up
1.97645	11.5877	4.1931	0.00016523	0.000753995	0.0844172	OTULINL	Up
1.98134	11.616	7.36237	9.55304247510571e-09	1.86596810962345e-07	9.73388	HSF1	Up
1.98406	12.7449	3.95103	0.000337917	0.0013846	-0.608968	L1CAM	Up
2.00266	12.2438	5.12188	9.74779412190868e-06	6.90606431009801e-05	2.85523	ANLN	Up
2.00864	13.0534	9.58065	1.50289110615307e-11	7.59929615772562e-10	16.1838	CDK1	Up
2.05432	13.8215	4.38423	9.31700551055894e-05	0.000465479	0.642053	VKORC1	Up
2.05524	12.2787	5.90806	8.4565092578853e-07	8.80854399076298e-06	5.27202	SIGMAR1	Up
2.0579	13.7904	4.37109	9.69336053024662e-05	0.000481632	0.603447	PCSK9	Up
2.0619	11.833	7.03348	2.60163490286712e-08	4.4326768589611e-07	8.73461	WRAP73	Up
2.07517	11.3356	6.46809	1.48403412723542e-07	1.98398592276462e-06	7.00052	SLC37A4	Up
2.08723	12.167	3.15681	0.00317359	0.00910912	-2.74988	DPEP1	Up
2.09608	11.6574	3.54329	0.0010926	0.00370102	-1.73732	NCR3LG1	Up
2.13475	12.6459	5.36948	4.52229906731985e-06	3.64457778304569e-05	3.61269	ATAD2	Up
2.14677	14.5202	8.14872	9.08116425421483e-10	2.46488744042974e-08	12.0839	PYCR1	Up
2.14938	11.5884	8.45094	3.74255572042548e-10	1.1851426448014e-08	12.9698	TMEM141	Up
2.15935	14.7447	2.88423	0.0065142	0.0166221	-3.42351	GPA33	Up
2.1619	11.6165	9.6095	1.38739479360418e-11	7.07659743241131e-10	16.2637	ERCC6L	Up
2.17581	12.8768	5.45178	3.50134547820151e-06	2.95073066509724e-05	3.86545	RRM2	Up
2.19022	11.7998	7.83393	2.3115174577286e-09	5.4705547614675e-08	11.1505	PAN3	Up
2.21524	11.8781	5.87635	9.33438734952913e-07	9.51652173683702e-06	5.17409	ARSL	Up
2.21593	14.3004	4.27381	0.000129828	0.000617724	0.318876	MSH6	Up
2.22899	14.1653	3.82596	0.000486564	0.00188086	-0.960808	FSCN1	Up
2.24683	11.9608	5.11215	1.00457822532315e-05	7.06925417819997e-05	2.82557	FADS2	Up
2.247	12.0013	8.44672	3.78882618185522e-10	1.1937658371976e-08	12.9575	PBK	Up
2.25463	12.3835	6.2625	2.80778492111971e-07	3.43843973738683e-06	6.36655	PRIM2	Up
2.30338	16.4587	2.8266	0.00755426	0.0188424	-3.56111	NSUN4	Up
2.30341	12.2871	7.73008	3.1533862168806e-09	7.26901896317696e-08	10.8403	NUSAP1	Up
2.30577	12.1393	6.51578	1.28038049712176e-07	1.75283530937848e-06	7.14736	TK1	Up
2.30652	12.1902	6.26405	2.79428102531954e-07	3.43476196824082e-06	6.37134	FAM118A	Up
2.31283	11.8141	7.02403	2.67799507398962e-08	4.52588385819809e-07	8.70577	PRC1	Up
2.32436	11.9112	9.35146	2.84794875678345e-11	1.29576869718864e-09	15.5448	RNASEH2B	Up
2.34082	12.0791	7.96981	1.54232234817044e-09	3.91512596074034e-08	11.5547	KIFC1	Up
2.34536	13.7472	6.49456	1.36725979943524e-07	1.85959196148784e-06	7.08205	TOP2A	Up
2.35807	11.954	5.04626	1.23158941366699e-05	8.40834146472779e-05	2.62499	SLC38A5	Up
2.36086	11.5743	4.55415	5.57102066305583e-05	0.000300605	1.14419	IGF2	Up
2.38734	12.3138	6.5212	1.25907627613242e-07	1.728312710147e-06	7.16406	PIGU	Up
2.39722	12.9897	7.63603	4.18161358234637e-09	9.46399903336284e-08	10.5585	EEPD1	Up
2.42155	11.6948	12.4177	9.65440409800744e-15	1.23536966723483e-12	23.5199	AKR1C1	Up
2.49929	12.0637	4.56809	5.33989908067494e-05	0.000289629	1.18562	TP53	Up
2.55116	13.9159	3.89038	0.000403455	0.00161434	-0.780178	TRIM29	Up
2.55603	12.9536	7.26581	1.28073248798692e-08	2.43339172717514e-07	9.44138	PIN4	Up
2.55652	12.121	8.57753	2.58993079320072e-10	8.77776544506408e-09	13.3378	FANCI	Up
2.63384	12.8681	5.16777	8.456669657132e-06	6.07405677234211e-05	2.99522	QPRT	Up
2.65899	12.7832	5.97101	6.95141288508329e-07	7.42510371200549e-06	5.46642	CHEK2	Up
2.67622	12.6893	5.99736	6.40380627199781e-07	6.89894593220383e-06	5.54782	THOC3	Up
2.68731	12.455	3.8474	0.000457206	0.00178387	-0.900824	CES1	Up
2.69047	14.6074	4.53023	5.99075215302491e-05	0.000318863	1.07318	RPS6KB2	Up
2.71925	15.6834	9.65669	1.21751383272893e-11	6.36150977600867e-10	16.3943	AKR1C3	Up
2.72302	12.6981	8.16131	8.75007501685666e-10	2.4094567496516e-08	12.121	TPX2	Up
2.74111	13.4034	6.11392	4.45575666420985e-07	5.07034379030776e-06	5.90783	ABT1	Up
2.81811	13.3465	8.84954	1.18202238041331e-10	4.35957666187731e-09	14.1219	CPVL	Up
2.83312	11.8667	9.29403	3.34621018195746e-11	1.47751674935727e-09	15.3836	AURKB	Up
2.9054	13.8213	10.1923	2.82182639232124e-12	1.73459328233864e-10	17.8555	VSNL1	Up
2.99294	13.4921	4.4793	6.9911687487553e-05	0.000362569	0.922301	IGF2BP1	Up
3.02992	12.2544	7.2166	1.48761063067126e-08	2.74332901597318e-07	9.29201	AKR1C2	Up
3.05952	16.3689	2.77666	0.00857863	0.0209129	-3.67889	FABP1	Up
3.11409	13.4609	6.92113	3.67083391064038e-08	5.88647790785555e-07	8.39144	SLC5A6	Up
3.17604	12.4906	13.6641	5.2398953002774e-16	1.0266919853981e-13	26.4162	SMOC2	Up
3.21952	12.3261	11.7981	4.40416322010492e-14	4.45388764355772e-12	22.0079	CDK6	Up
3.51207	12.5153	17.4176	2.20305036149205e-19	1.38131257665552e-16	34.0855	KIF2C	Up
3.59691	13.0944	12.8663	3.31228932845789e-15	5.32514207421308e-13	24.5843	FKBP10	Up
3.66782	13.9711	9.19448	4.42953716733982e-11	1.87656743508248e-09	15.1032	AKR1B1	Up
4.16987	12.555	6.77842	5.69195158302781e-08	8.49727057752009e-07	7.95443	CES1P1	Up
