# Supplementary material
Source: Research Square preprint supplement (doi:10.21203/rs.3.rs-9151067/v1)
Supplement: Supplementary file 2 [file 598134efb45f456160ed51bc.xlsx]

## Sheet: Marisa
logFC

## Sheet: Jorissen
logFC

## Sheet: TCGA_nonormBiolinks
logFC

## Sheet: TCGA_nonormBiolinksLog
logFC
