# Supplementary material
Source: Research Square preprint supplement (doi:10.21203/rs.3.rs-9151067/v1)
Supplement: Supplementary file 4 [file 9b6171f9ec1f8b6bb6d59730.xlsx]

## Sheet: AllData
CT_1.scaled

## Sheet: EED1.vs.CT
CT_1.scaled

## Sheet: EED3.vs.CT
CT_1.scaled

## Sheet: EPZ.vs.CT
CT_1.scaled

## Sheet: ALL.vs.CT
CT_1.scaled

## Sheet: EED1.vs.EED3
CT_1.scaled

## Sheet: EED1.vs.EPZ
CT_1.scaled

## Sheet: EED3.vs.EPZ
CT_1.scaled

## Sheet: Legend
-3.13756
