# Supplementary material
Source: Research Square preprint supplement (doi:10.21203/rs.3.rs-9151067/v1)
Supplement: Supplementary file 5 [file b133542b8ebdee4737f91d27.xlsx]

## Sheet: AllData
CT_2.scaled	CT_3.scaled	EPZ_1.scaled	EPZ_2.scaled	EPZ_3.scaled	IC_1.scaled	IC_2.scaled	IC_3.scaled	Geneid	Chr	Start	End	Strand	Length	Description	GO.BP	GO.CC	GO.MF	FC.EPZ.vs.Control	logFC.EPZ.vs.Control	P.Value.EPZ.vs.Control	adj.P.Val.EPZ.vs.Control	FC.IC.vs.Control	logFC.IC.vs.Control	P.Value.IC.vs.Control	adj.P.Val.IC.vs.Control	FC.EPZ.vs.IC	logFC.EPZ.vs.IC	P.Value.EPZ.vs.IC	adj.P.Val.EPZ.vs.IC	mean.Control	mean.EPZ	mean.IC	CT_2	CT_3	EPZ_1	EPZ_2	EPZ_3	IC_1	IC_2	IC_3
-0.52705	-0.776128	-0.130373	-1.1392	-0.474869	0.405236	2.00099	0.641405	5S_rRNA	chr1	182944365	182944490	-	1140	NA				1.03555	0.0503953	0.935019	0.952638	1.90281	0.928131	0.122658	0.18287	-1.83749	-0.877736	0.0935148	0.132285	-3.61526	-3.57615	-2.68498	-3.54578	-3.68474	-3.32447	-3.8873	-3.51667	-3.02566	-2.13538	-2.8939
0.889878	0.475378	-0.99246	-0.788115	-1.67796	0.864889	0.443964	0.78443	A1CF	chr10	50799409	50806880	-	9603	APOBEC1 complementation factor	GO:0006397mRNAprocessing//GO:0007566embryoimplantation//GO:0010609mRNAlocalizationresultinginposttranscriptionalregulationofgeneexpression//GO:0016554cytidinetouridineediting//GO:0016556mRNAmodification//GO:0050821proteinstabilization	GO:0005634nucleus//GO:0005654nucleoplasm//GO:0005737cytoplasm//GO:0005783endoplasmicreticulum//GO:0030895apolipoproteinBmRNAeditingenzymecomplex	GO:0003723RNAbinding//GO:0003727single-strandedRNAbinding//GO:0003729mRNAbinding//GO:0005515proteinbinding	-2.28661	-1.19321	1.72697e-07	1.08253e-06	1.00651	0.00935534	0.94687	0.960833	-2.30149	-1.20257	6.66382e-08	2.60699e-07	1.94761	0.736665	1.95759	2.08434	1.81088	0.842479	0.977294	0.390221	2.06785	1.79015	2.01477
-1.68438	-1.10721	0.984937	0.729749	0.883929	0.542736	-0.560412	0.210647	A2M-AS1	chr12	9065163	9065228	+	2948	A2M antisense RNA 1				2.70418	1.43519	9.76489e-05	0.000326301	1.89567	0.922707	0.00910641	0.0183229	1.4265	0.512484	0.0329862	0.0517881	-1.54522	-0.115489	-0.62233	-1.72762	-1.36281	-0.0404431	-0.201738	-0.104287	-0.319942	-1.0172	-0.529844
-1.40243	-1.22059	1.04368	1.13907	0.973084	0.00933286	-0.0940431	-0.448101	A4GALT	chr22	42692121	42693997	-	3358	alpha 1,4-galactosyltransferase (P blood group)	GO:0001576globosidebiosyntheticprocess//GO:0006688glycosphingolipidbiosyntheticprocess//GO:0007009plasmamembraneorganization	GO:0016020membrane//GO:0030173integralcomponentofGolgimembrane	GO:0008378galactosyltransferaseactivity//GO:0015643toxicsubstancebinding//GO:0016758hexosyltransferaseactivity//GO:0050512lactosylceramide4-alpha-galactosyltransferaseactivity	5.85026	2.5485	3.10271e-10	3.94785e-09	2.31244	1.20941	0.000121044	0.000349359	2.52991	1.33909	2.15203e-08	9.07571e-08	-0.927608	1.61779	0.293587	-1.02553	-0.829691	1.60889	1.71162	1.53286	0.494915	0.383581	0.00226665
1.4287	1.47888	-0.229911	-0.0664525	0.0807655	-1.33604	-0.635254	-0.720683	AAAS	chr12	53307456	53307713	-	4727	aladin WD repeat nucleoporin	GO:0001578microtubulebundleformation//GO:0006913nucleocytoplasmictransport//GO:0007612learning//GO:0009566fertilization//GO:0015031proteintransport//GO:0046822regulationofnucleocytoplasmictransport//GO:0051028mRNAtransport//GO:0090307mitoticspindleassembly	GO:0000922spindlepole//GO:0005634nucleus//GO:0005635nuclearenvelope//GO:0005643nuclearpore//GO:0005654nucleoplasm//GO:0005813centrosome//GO:0005829cytosol//GO:0016020membrane//GO:0031965nuclearmembrane//GO:0072686mitoticspindle	GO:0003674molecular_function//GO:0005515proteinbinding	-1.27427	-0.349674	7.80302e-07	4.20233e-06	-1.44777	-0.533828	1.34009e-09	8.70661e-09	1.13615	0.184155	0.00127429	0.00257232	5.46718	5.11952	4.93141	5.46147	5.4729	5.0835	5.12075	5.1543	4.83144	4.99113	4.97166
-1.52333	-1.53139	0.383152	0.151987	0.506843	0.485597	1.26637	0.260774	AACS	chr12	125065434	125065717	+	16039	acetoacetyl-CoA synthetase	GO:0001889liverdevelopment//GO:0006631fattyacidmetabolicprocess//GO:0007584responsetonutrient//GO:0009410responsetoxenobioticstimulus//GO:0014074responsetopurine-containingcompound//GO:0032024positiveregulationofinsulinsecretion//GO:0034201responsetooleicacid//GO:0042594responsetostarvation//GO:0045471responsetoethanol//GO:0046951ketonebodybiosyntheticprocess//GO:0050872whitefatcelldifferentiatio…	GO:0005829cytosol	GO:0005515proteinbinding//GO:0005524ATPbinding//GO:0030729acetoacetate-CoAligaseactivity//GO:0047760butyrate-CoAligaseactivity	1.20084	0.264049	1.81039e-05	7.12254e-05	1.23902	0.309201	2.56366e-06	9.73123e-06	-1.03179	-0.045152	0.305223	0.375282	5.56835	5.83268	5.8783	5.56892	5.56778	5.83773	5.80514	5.85517	5.85217	5.96226	5.82048
0.424364	0.798303	1.13472	0.498883	0.58134	-1.1526	-1.57209	-0.712912	AACSP1	chr5	178764861	178766175	-	3380	acetoacetyl-CoA synthetase pseudogene 1				1.05117	0.072001	0.67955	0.752493	-1.73374	-0.793887	0.000766388	0.00192877	1.82246	0.865888	0.000120401	0.000285651	0.662204	0.720085	-0.13878	0.576978	0.74743	0.900778	0.610946	0.648533	-0.14185	-0.333065	0.0585741
-0.38694	-0.177053	-0.867566	-1.35868	-0.559368	1.44647	0.996868	0.906267	AADAC	chr3	151814073	151814300	+	1632	arylacetamide deacetylase	GO:0006805xenobioticmetabolicprocess//GO:0010898positiveregulationoftriglyceridecatabolicprocess	GO:0005789endoplasmicreticulummembrane//GO:0016021integralcomponentofmembrane	GO:0003824catalyticactivity//GO:0004806triglyceridelipaseactivity//GO:0005515proteinbinding//GO:0016298lipaseactivity//GO:0016787hydrolaseactivity//GO:0017171serinehydrolaseactivity//GO:0019213deacetylaseactivity	-1.34867	-0.431532	0.181304	0.260234	1.88319	0.913177	0.00321746	0.00714714	-2.53979	-1.34471	3.61982e-05	9.29113e-05	-1.15478	-1.58034	-0.234261	-1.22385	-1.08571	-1.5402	-1.86346	-1.33735	-0.017095	-0.313027	-0.372661
-0.16778	-0.337153	-0.982304	-1.34538	0.139671	0.204492	0.56391	1.92455	AADACP1	chr3	151770396	151770611	+	2095	arylacetamide deacetylase pseudogene 1				-1.05891	-0.0825789	0.627381	0.706873	1.13933	0.188181	0.277355	0.366363	-1.20644	-0.270759	0.0885151	0.126043	0.704681	0.629437	0.886153	0.718043	0.691319	0.589523	0.532234	0.766554	0.776782	0.833493	1.04818
0.938826	0.452063	0.633625	0.681804	0.866438	-1.35737	-1.08814	-1.12724	AADAT	chr4	170060222	170060969	-	2970	aminoadipate aminotransferase	GO:00061032-oxoglutaratemetabolicprocess//GO:0006536glutamatemetabolicprocess//GO:0009058biosyntheticprocess//GO:0033512L-lysinecatabolicprocesstoacetyl-CoAviasaccharopine//GO:0070189kynureninemetabolicprocess//GO:0097052L-kynureninemetabolicprocess//GO:1901605alpha-aminoacidmetabolicprocess	GO:0005759mitochondrialmatrix	GO:0008483transaminaseactivity//GO:0016212kynurenine-oxoglutaratetransaminaseactivity//GO:0030170pyridoxalphosphatebinding//GO:0042803proteinhomodimerizationactivity//GO:00475362-aminoadipatetransaminaseactivity	1.00634	0.00912415	0.876915	0.909487	-1.64173	-0.715215	1.86065e-10	1.39549e-09	1.65214	0.72434	2.45156e-11	1.70925e-10	4.91942	4.93151	4.20317	5.01183	4.82701	4.89595	4.91424	4.98435	4.13997	4.2422	4.22735
-0.502807	-0.757973	1.56287	1.14285	0.759689	-0.388026	-1.06044	-0.756155	AAGAB	chr15	67200667	67202898	-	4138	alpha and gamma adaptin binding protein	GO:0015031proteintransport	GO:0005737cytoplasm//GO:0005829cytosol//GO:0016607nuclearspeck	GO:0005515proteinbinding	1.24835	0.320021	3.79494e-07	2.18456e-06	-1.01331	-0.0190777	0.684309	0.755377	1.26497	0.339098	3.02152e-08	1.2468e-07	6.86248	7.17994	6.84391	6.88517	6.8398	7.25243	7.17775	7.10963	6.90557	6.78602	6.84012
-1.04754	-1.05718	1.1645	1.08316	1.0138	-1.10689	-0.0520758	0.00223592	AAK1	chr2	69457997	69475963	-	24843	AP2 associated kinase 1	GO:0006468proteinphosphorylation//GO:0006897endocytosis//GO:0032880regulationofproteinlocalization//GO:0045747positiveregulationofNotchsignalingpathway//GO:0046777proteinautophosphorylation//GO:0050821proteinstabilization//GO:0061024membraneorganization//GO:2000369regulationofclathrin-dependentendocytosis	GO:0005737cytoplasm//GO:0005829cytosol//GO:0005905clathrin-coatedpit//GO:0019897extrinsiccomponentofplasmamembrane//GO:0030136clathrin-coatedvesicle//GO:0031252cellleadingedge//GO:0043195terminalbouton	GO:0004674proteinserine/threoninekinaseactivity//GO:0005112Notchbinding//GO:0005515proteinbinding//GO:0005524ATPbinding//GO:0035612AP-2adaptorcomplexbinding//GO:0106310proteinserinekinaseactivity	1.5732	0.653705	1.29607e-09	1.38016e-08	1.15443	0.207184	0.00618971	0.0129591	1.36275	0.446521	1.24907e-07	4.66802e-07	5.60797	6.2607	5.81139	5.60944	5.6065	6.28429	6.25948	6.23832	5.59133	5.91314	5.92971
0.405983	0.287236	1.3329	0.749203	0.470252	-1.23309	-0.437018	-1.57547	AAMDC	chr11	77821109	77821180	+	1936	adipogenesis associated Mth938 domain containing	GO:0045600positiveregulationoffatcelldifferentiation	GO:0005737cytoplasm	GO:0005515proteinbinding	1.09773	0.134521	0.161333	0.236067	-1.28022	-0.35639	0.0021646	0.00497823	1.40533	0.490911	2.22353e-05	5.89216e-05	2.90157	3.02613	2.54865	2.91624	2.8869	3.14524	3.00103	2.93211	2.51128	2.70796	2.42669
0.65427	0.200698	1.16176	0.911776	0.352576	-0.81464	-0.722809	-1.74363	AAMP	chr2	218264129	218264608	-	3055	angio associated migratory cell protein	GO:0001525angiogenesis//GO:0010595positiveregulationofendothelialcellmigration//GO:0014909smoothmusclecellmigration//GO:0030154celldifferentiation	GO:0005829cytosol//GO:0005886plasmamembrane//GO:0009986cellsurface//GO:0015630microtubulecytoskeleton//GO:0045171intercellularbridge	GO:0005515proteinbinding//GO:0008201heparinbinding	1.03172	0.0450584	0.302639	0.39524	-1.12868	-0.174635	0.000624854	0.00159724	1.16449	0.219694	1.2394e-05	3.40729e-05	6.99937	7.04283	6.82598	7.02522	6.97352	7.08307	7.05457	6.99083	6.85779	6.86825	6.75189
-0.0368305	-0.871055	0.170095	-1.79817	0.223915	-0.0523563	1.43663	0.927769	AANAT	chr17	76453351	76453782	+	2156	aralkylamine N-acetyltransferase	GO:0006474N-terminalproteinaminoacidacetylation//GO:0007623circadianrhythm//GO:0009416responsetolightstimulus//GO:0009648photoperiodism//GO:0010043responsetozincion//GO:0030187melatoninbiosyntheticprocess//GO:0032868responsetoinsulin//GO:0034097responsetocytokine//GO:0034695responsetoprostaglandinE//GO:0046219indolalkylaminebiosyntheticprocess//GO:0046688responsetocopperion//GO:0051412responsetoc…	GO:0005737cytoplasm//GO:0005829cytosol//GO:0048471perinuclearregionofcytoplasm	GO:0004059aralkylamineN-acetyltransferaseactivity//GO:0004060arylamineN-acetyltransferaseactivity//GO:0005515proteinbinding//GO:007188914-3-3proteinbinding	-1.00211	-0.00303728	0.996656	0.997394	1.8657	0.899719	0.198396	0.276145	-1.86963	-0.902756	0.142421	0.192644	-4.00951	-4.01977	-3.11914	-3.70625	-4.31277	-3.5558	-4.98684	-3.51667	-3.71753	-2.63496	-3.00493
0.157227	-0.519039	1.06194	1.28003	0.780771	-0.481929	-0.63904	-1.63996	AAR2	chr20	36236131	36236782	+	7291	AAR2 splicing factor	GO:0000244spliceosomaltri-snRNPcomplexassembly	GO:0005681spliceosomalcomplex//GO:0005682U5snRNP		1.11526	0.157386	0.00581393	0.0130168	-1.06982	-0.0973614	0.0828162	0.130404	1.19313	0.254748	2.19747e-05	5.82644e-05	5.42014	5.57693	5.32525	5.46353	5.37675	5.57963	5.60762	5.54355	5.38151	5.36135	5.2329
0.642905	0.577964	0.806723	0.826642	0.754908	-1.16161	-1.1787	-1.26883	AARS1	chr16	70251983	70252906	-	10248	alanyl-tRNA synthetase 1	GO:0006400tRNAmodification//GO:0006418tRNAaminoacylationforproteintranslation//GO:0006419alanyl-tRNAaminoacylation//GO:0008033tRNAprocessing//GO:0021680cerebellarPurkinjecelllayerdevelopment//GO:0043524negativeregulationofneuronapoptoticprocess//GO:0050885neuromuscularprocesscontrollingbalance//GO:0106074aminoacyl-tRNAmetabolisminvolvedintranslationalfidelity//GO:0140018regulationofcytoplasmictra…	GO:0005737cytoplasm//GO:0005739mitochondrion//GO:0005829cytosol//GO:0016020membrane//GO:0070062extracellularexosome	GO:0000049tRNAbinding//GO:0002161aminoacyl-tRNAeditingactivity//GO:0002196Ser-tRNA(Ala)hydrolaseactivity//GO:0004813alanine-tRNAligaseactivity//GO:0005524ATPbinding//GO:0008270zincionbinding//GO:0016597aminoacidbinding//GO:0045182translationregulatoractivity	1.09793	0.134782	0.000574805	0.00162353	-2.48368	-1.31248	4.96744e-21	3.82671e-19	2.7269	1.44726	6.53883e-23	8.67059e-21	8.49585	8.63013	7.1842	8.51933	8.47236	8.63782	8.65223	8.60034	7.21417	7.2018	7.13662
1.11744	1.02871	0.452276	0.433638	0.457507	-1.26014	-1.01974	-1.20969	AARS2	chr6	44298731	44300711	-	5242	alanyl-tRNA synthetase 2, mitochondrial	GO:0006400tRNAmodification//GO:0006419alanyl-tRNAaminoacylation//GO:0070143mitochondrialalanyl-tRNAaminoacylation//GO:0106074aminoacyl-tRNAmetabolisminvolvedintranslationalfidelity	GO:0005739mitochondrion	GO:0000049tRNAbinding//GO:0002161aminoacyl-tRNAeditingactivity//GO:0004813alanine-tRNAligaseactivity//GO:0005515proteinbinding//GO:0005524ATPbinding//GO:0008270zincionbinding//GO:0016597aminoacidbinding	-1.14444	-0.194647	0.000316382	0.000941637	-1.61998	-0.695974	1.39129e-12	1.57033e-11	1.41552	0.501327	1.60556e-10	9.61829e-10	5.59323	5.39865	4.89731	5.60704	5.57942	5.40004	5.39424	5.40167	4.86714	4.94195	4.88284
0.412023	1.08272	0.441116	-0.428853	-2.2565	0.266054	0.244232	0.23921	AARSD1	chr17	42950526	42950728	-	3704	alanyl-tRNA synthetase domain containing 1	GO:0006419alanyl-tRNAaminoacylation//GO:0006450regulationoftranslationalfidelity//GO:0008150biological_process//GO:0106074aminoacyl-tRNAmetabolisminvolvedintranslationalfidelity	GO:0005634nucleus//GO:0005737cytoplasm	GO:0002196Ser-tRNA(Ala)hydrolaseactivity//GO:0003674molecular_function//GO:0003676nucleicacidbinding//GO:0004813alanine-tRNAligaseactivity//GO:0005524ATPbinding//GO:0046872metalionbinding	-1.22415	-0.291782	0.0307169	0.0570449	-1.07608	-0.10578	0.417803	0.512575	-1.13761	-0.186003	0.136052	0.184824	2.40064	2.0817	2.29453	2.32912	2.47216	2.33532	2.14978	1.76	2.29799	2.29333	2.29226
-2.264	-0.325525	0.383177	0.483321	-0.223437	0.446951	0.666306	0.833211	AARSD1P1	chrX	74069276	74070057	+	1182	AARSD1 pseudogene 1				5.7673	2.5279	0.0221085	0.0427869	9.3177	3.21997	0.0042334	0.00916645	-1.61561	-0.692077	0.240272	0.304632	-6.198	-3.71345	-2.99816	-7.79371	-4.60228	-3.43551	-3.27063	-4.43421	-3.33051	-2.96937	-2.69459
0.120848	0.675908	1.10847	0.697564	0.772275	-1.05128	-1.61557	-0.708211	AASDH	chr4	56338287	56338791	-	4654	aminoadipate-semialdehyde dehydrogenase	GO:0006631fattyacidmetabolicprocess//GO:0019482beta-alaninemetabolicprocess//GO:0043041aminoacidactivationfornonribosomalpeptidebiosyntheticprocess		GO:0005524ATPbinding//GO:0016878acid-thiolligaseactivity	1.06729	0.0939579	0.144224	0.214753	-1.23007	-0.29874	0.000185687	0.000520566	1.31285	0.392698	1.27715e-06	4.08533e-06	4.39845	4.48958	4.09737	4.3436	4.4533	4.53879	4.45758	4.47235	4.11194	4.00042	4.17975
-0.827912	-1.73462	0.285419	1.06822	-0.708106	0.796871	0.160491	0.959635	AASDHPPT	chr11	106075501	106075576	+	6003	aminoadipate-semialdehyde dehydrogenase-phosphopantetheinyl transferase	GO:0015939pantothenatemetabolicprocess//GO:0018215proteinphosphopantetheinylation//GO:0019878lysinebiosyntheticprocessviaaminoadipicacid	GO:0005829cytosol//GO:0070062extracellularexosome	GO:0000287magnesiumionbinding//GO:0005515proteinbinding//GO:0008897holo-[acyl-carrier-protein]synthaseactivity	1.0738	0.102723	0.0400555	0.0719965	1.09464	0.13046	0.0123618	0.0241293	-1.01941	-0.027737	0.520385	0.591563	5.76225	5.86378	5.89254	5.79301	5.7315	5.86855	5.92166	5.80114	5.90325	5.86007	5.91429
-0.446036	-0.590225	1.13573	1.15008	1.2668	-1.11919	-0.756496	-0.640662	AASS	chr7	122064583	122064650	-	10816	aminoadipate-semialdehyde synthase	GO:0000122negativeregulationoftranscriptionbyRNApolymeraseII//GO:0006554lysinecatabolicprocess//GO:0019878lysinebiosyntheticprocessviaaminoadipicacid//GO:0031061negativeregulationofhistonemethylation//GO:0033512L-lysinecatabolicprocesstoacetyl-CoAviasaccharopine	GO:0005634nucleus//GO:0005737cytoplasm//GO:0005739mitochondrion//GO:0005759mitochondrialmatrix//GO:0005829cytosol//GO:0043231intracellularmembrane-boundedorganelle	GO:0003714transcriptioncorepressoractivity//GO:0004753saccharopinedehydrogenaseactivity//GO:0004754saccharopinedehydrogenase(NAD+,L-lysine-forming)activity//GO:0042393histonebinding//GO:0047130saccharopinedehydrogenase(NADP+,L-lysine-forming)activity//GO:0047131saccharopinedehydrogenase(NAD+,L-glutamate-forming)activity	1.69641	0.762481	1.33116e-12	3.5e-11	-1.10263	-0.140954	0.0231729	0.0424382	1.87051	0.903435	8.22187e-15	1.14996e-13	5.29855	6.06238	5.15467	5.3309	5.2662	6.04063	6.04707	6.09945	5.02885	5.19159	5.24357
-0.825629	-0.60645	-0.705744	-0.785893	-0.681191	1.10485	1.36182	1.13823	AATBC	chr21	43805758	43806588	-	4874	apoptosis associated transcript in bladder cancer				-1.00683	-0.00982693	0.951083	0.964174	5.2129	2.38209	1.69583e-14	2.68274e-13	-5.24853	-2.39191	4.12351e-16	7.67895e-15	1.49469	1.48446	3.87653	1.35858	1.63081	1.50748	1.40793	1.53797	3.75633	4.0755	3.79778
1.16888	0.58119	0.635405	0.580702	0.538611	-0.851131	-1.22813	-1.42554	AATF	chr17	36948925	36949216	+	12155	apoptosis antagonizing transcription factor	GO:0006357regulationoftranscriptionbyRNApolymeraseII//GO:0006974cellularresponsetoDNAdamagestimulus//GO:0007155celladhesion//GO:0007346regulationofmitoticcellcycle//GO:0032929negativeregulationofsuperoxideaniongeneration//GO:0040016embryoniccleavage//GO:0042254ribosomebiogenesis//GO:0042985negativeregulationofamyloidprecursorproteinbiosyntheticprocess//GO:0043066negativeregulationofapoptoticproce…	GO:0005634nucleus//GO:0005654nucleoplasm//GO:0005667transcriptionregulatorcomplex//GO:0005730nucleolus//GO:0005737cytoplasm//GO:0005794Golgiapparatus	GO:0003723RNAbinding//GO:0005515proteinbinding//GO:0019901proteinkinasebinding//GO:0043522leucinezipperdomainbinding//GO:0048156tauproteinbinding	-1.04377	-0.0617999	0.185473	0.265077	-1.35522	-0.43853	4.27193e-09	2.54389e-08	1.2984	0.37673	1.04745e-08	4.6441e-08	6.5318	6.46975	6.09481	6.59464	6.46896	6.48055	6.46885	6.45985	6.16264	6.08201	6.03979
-0.473376	-0.413693	-0.826004	-0.811006	-1.02566	1.15558	1.2726	1.12156	AATK	chr17	81110487	81118442	-	13177	apoptosis associated tyrosine kinase	GO:0006468proteinphosphorylation//GO:0007420braindevelopment//GO:0008150biological_process//GO:0038083peptidyl-tyrosineautophosphorylation	GO:0005575cellular_component//GO:0016021integralcomponentofmembrane//GO:0048471perinuclearregionofcytoplasm	GO:0004672proteinkinaseactivity//GO:0004713proteintyrosinekinaseactivity//GO:0005515proteinbinding//GO:0005524ATPbinding//GO:0106310proteinserinekinaseactivity	-1.23834	-0.308413	0.000186033	0.000584102	2.21809	1.14932	7.37855e-15	1.25692e-13	-2.74676	-1.45773	7.57044e-18	2.12676e-16	4.04157	3.72771	5.19147	4.02047	4.06266	3.77122	3.78182	3.63009	5.17191	5.25463	5.14786
-1.19555	-1.30032	-0.191766	-0.341198	-0.270405	1.0587	1.22669	1.01385	ABAT	chr16	8674596	8674711	+	9713	4-aminobutyrate aminotransferase	GO:0001666responsetohypoxia//GO:0007568aging//GO:0007620copulation//GO:0007626locomotorybehavior//GO:0009410responsetoxenobioticstimulus//GO:0009448gamma-aminobutyricacidmetabolicprocess//GO:0009449gamma-aminobutyricacidbiosyntheticprocess//GO:0009450gamma-aminobutyricacidcatabolicprocess//GO:0010039responsetoironion//GO:0014053negativeregulationofgamma-aminobutyricacidsecretion//GO:0021549cerebe…	GO:0005739mitochondrion//GO:0005759mitochondrialmatrix//GO:00321444-aminobutyratetransaminasecomplex//GO:0043005neuronprojection	GO:00038674-aminobutyratetransaminaseactivity//GO:0030170pyridoxalphosphatebinding//GO:0032145succinate-semialdehydedehydrogenasebinding//GO:00343864-aminobutyrate:2-oxoglutaratetransaminaseactivity//GO:0042802identicalproteinbinding//GO:0046872metalionbinding//GO:0047298(S)-3-amino-2-methylpropionatetransaminaseactivity//GO:0051536iron-sulfurclusterbinding	1.33432	0.416106	4.83409e-09	4.46314e-08	1.99225	0.994399	1.22661e-16	3.06902e-15	-1.49308	-0.578293	3.63889e-13	3.61839e-12	5.86895	6.28429	6.86379	5.89115	5.84675	6.31651	6.25318	6.28318	6.84639	6.91758	6.82739
-1.84727	-1.26581	0.323647	0.264304	0.920552	0.659337	0.270368	0.674877	ABCA1	chr9	104781006	104784455	-	11343	ATP binding cassette subfamily A member 1	GO:0002790peptidesecretion//GO:0006497proteinlipidation//GO:0006869lipidtransport//GO:0006911phagocytosis,engulfment//GO:0007040lysosomeorganization//GO:0007186Gprotein-coupledreceptorsignalingpathway//GO:0007189adenylatecyclase-activatingGprotein-coupledreceptorsignalingpathway//GO:0007584responsetonutrient//GO:0008203cholesterolmetabolicprocess//GO:0009306proteinsecretion//GO:0010745negativereg…	GO:0005768endosome//GO:0005789endoplasmicreticulummembrane//GO:0005794Golgiapparatus//GO:0005886plasmamembrane//GO:0005887integralcomponentofplasmamembrane//GO:0009897externalsideofplasmamembrane//GO:0016323basolateralplasmamembrane//GO:0030139endocyticvesicle//GO:0043231intracellularmembrane-boundedorganelle//GO:0045121membraneraft//GO:0045335phagocyticvesicle//GO:0048471perinuclearregionofcytop…	GO:0005102signalingreceptorbinding//GO:0005319lipidtransporteractivity//GO:0005515proteinbinding//GO:0005524ATPbinding//GO:0005548phospholipidtransporteractivity//GO:0008035high-densitylipoproteinparticlebinding//GO:0008320proteintransmembranetransporteractivity//GO:0015485cholesterolbinding//GO:0019905syntaxinbinding//GO:0031210phosphatidylcholinebinding//GO:0031267smallGTPasebinding//GO:0034185…	7.75528	2.95518	6.00928e-05	0.000210124	8.25052	3.04449	4.65779e-05	0.000143846	-1.06386	-0.0893059	0.747266	0.792826	-3.67096	-0.679524	-0.633003	-4.09327	-3.24864	-0.939811	-1.02601	-0.0727515	-0.45219	-1.0172	-0.429617
-0.655625	-2.15962	0.0991141	0.212704	0.245378	0.824849	0.512272	0.92093	ABCA10	chr17	69147214	69147440	-	8405	ATP binding cassette subfamily A member 10	GO:0006869lipidtransport//GO:0055085transmembranetransport	GO:0016021integralcomponentofmembrane//GO:0043231intracellularmembrane-boundedorganelle	GO:0005319lipidtransporteractivity//GO:0005524ATPbinding//GO:0042626ATPase-coupledtransmembranetransporteractivity//GO:0140359ABC-typetransporteractivity	4.35227	2.12177	0.00115345	0.00304846	7.45958	2.89909	3.25035e-05	0.000103039	-1.71395	-0.777325	0.0149603	0.0251711	-3.59327	-1.45535	-0.694625	-2.58426	-4.60228	-1.57157	-1.41916	-1.37531	-0.597795	-1.0172	-0.468876
-1.04529	-0.510476	-0.9632	-0.672623	-0.292888	0.94461	1.09236	1.44751	ABCA11P	chr4	425435	426973	-	2790	ATP binding cassette subfamily A member 11, pseudogene				1.04724	0.0665868	0.747328	0.807789	2.36349	1.24092	1.24506e-06	4.97936e-06	-2.25689	-1.17433	2.25456e-07	8.07659e-07	0.252679	0.338426	1.48467	0.0828075	0.422551	0.134957	0.319547	0.560774	1.3469	1.44075	1.66636
-0.89602	-0.795871	-0.747197	-0.534396	-0.626118	1.12368	1.2444	1.23152	ABCA12	chr2	214931542	214932741	-	9614	ATP binding cassette subfamily A member 12	GO:0003336corneocytedesquamation//GO:0006672ceramidemetabolicprocess//GO:0006869lipidtransport//GO:0006886intracellularproteintransport//GO:0010875positiveregulationofcholesterolefflux//GO:0019725cellularhomeostasis//GO:0031424keratinization//GO:0032379positiveregulationofintracellularlipidtransport//GO:0032940secretionbycell//GO:0033700phospholipidefflux//GO:0034204lipidtranslocation//GO:0035627…	GO:0000139Golgimembrane//GO:0005737cytoplasm//GO:0005829cytosol//GO:0005886plasmamembrane//GO:0016021integralcomponentofmembrane//GO:0030658transportvesiclemembrane//GO:0043231intracellularmembrane-boundedorganelle//GO:0097209epidermallamellarbody//GO:0097234epidermallamellarbodymembrane	GO:0005102signalingreceptorbinding//GO:0005319lipidtransporteractivity//GO:0005515proteinbinding//GO:0005524ATPbinding//GO:0034040ATPase-coupledlipidtransmembranetransporteractivity//GO:0034191apolipoproteinA-Ireceptorbinding//GO:0042626ATPase-coupledtransmembranetransporteractivity//GO:0140326ATPase-coupledintramembranelipidtransporteractivity//GO:0140359ABC-typetransporteractivity	1.37537	0.459821	0.0317915	0.0588078	24.7934	4.63189	1.89872e-18	7.11786e-17	-18.0267	-4.17207	1.48354e-20	8.43858e-19	1.03039	1.50558	5.65884	0.917097	1.14367	1.25379	1.73524	1.52772	5.48647	5.75958	5.73046
-0.810559	-2.13812	0.595717	0.208045	0.317729	0.42516	0.934142	0.467891	ABCA13	chr7	48171458	48171552	+	19075	ATP binding cassette subfamily A member 13	GO:0006869lipidtransport//GO:0032376positiveregulationofcholesteroltransport//GO:0035627ceramidetransport//GO:0055085transmembranetransport//GO:1900244positiveregulationofsynapticvesicleendocytosis	GO:0005886plasmamembrane//GO:0016021integralcomponentofmembrane//GO:0030667secretorygranulemembrane//GO:0035577azurophilgranulemembrane//GO:0043231intracellularmembrane-boundedorganelle//GO:0097708intracellularvesicle	GO:0005319lipidtransporteractivity//GO:0005524ATPbinding//GO:0042626ATPase-coupledtransmembranetransporteractivity//GO:0140359ABC-typetransporteractivity	9.32959	3.22181	0.00536173	0.0120844	12.1455	3.60236	0.00220194	0.00505651	-1.30183	-0.380541	0.478309	0.551424	-6.62199	-3.41946	-3.01184	-5.47178	-7.77221	-3.03497	-3.70673	-3.51667	-3.33051	-2.44854	-3.25647
0.890324	1.11974	-0.861719	0.348505	-1.10553	0.928888	-1.41276	0.0925556	ABCA17P	chr16	2339150	2339331	+	6574	ATP binding cassette subfamily A member 17, pseudogene				-1.7733	-0.826437	0.0757571	0.124572	-1.52774	-0.611402	0.188076	0.263874	-1.16073	-0.215035	0.642826	0.703469	-1.95096	-2.77766	-2.55868	-2.01235	-1.88956	-2.95008	-2.30234	-3.08057	-1.99171	-3.24501	-2.43933
0.196772	0.183809	-1.23972	-1.16173	-0.97726	0.783442	1.20675	1.00794	ABCA2	chr9	137007234	137007964	-	11500	ATP binding cassette subfamily A member 2	GO:0001573gangliosidemetabolicprocess//GO:0006357regulationoftranscriptionbyRNApolymeraseII//GO:0006629lipidmetabolicprocess//GO:0006684sphingomyelinmetabolicprocess//GO:0006687glycosphingolipidmetabolicprocess//GO:0006869lipidtransport//GO:0007626locomotorybehavior//GO:0009410responsetoxenobioticstimulus//GO:0010872regulationofcholesterolesterification//GO:0032289centralnervoussystemmyelinformat…	GO:0005764lysosome//GO:0005765lysosomalmembrane//GO:0005768endosome//GO:0005815microtubuleorganizingcenter//GO:0005886plasmamembrane//GO:0010008endosomemembrane//GO:0016020membrane//GO:0016021integralcomponentofmembrane//GO:0031410cytoplasmicvesicle//GO:0043190ATP-bindingcassette(ABC)transportercomplex//GO:0043231intracellularmembrane-boundedorganelle	GO:0000166nucleotidebinding//GO:0005319lipidtransporteractivity//GO:0005524ATPbinding//GO:0042626ATPase-coupledtransmembranetransporteractivity//GO:0061135endopeptidaseregulatoractivity//GO:0099038ceramidefloppaseactivity//GO:0140359ABC-typetransporteractivity	-1.32465	-0.405611	6.29794e-10	7.33908e-09	1.18822	0.248802	1.70442e-06	6.63519e-06	-1.57397	-0.654412	6.00915e-15	8.65228e-14	8.04289	7.63867	8.29131	8.04488	8.0409	7.60382	7.62777	7.68441	8.22501	8.35498	8.29394
-1.10166	-0.996916	1.18959	1.11734	1.20001	-0.428738	-0.377397	-0.602225	ABCA3	chr16	2275881	2276805	-	7804	ATP binding cassette subfamily A member 3	GO:0006855xenobiotictransmembranetransport//GO:0006869lipidtransport//GO:0009410responsetoxenobioticstimulus//GO:0010875positiveregulationofcholesterolefflux//GO:0015914phospholipidtransport//GO:0030324lungdevelopment//GO:0032464positiveregulationofproteinhomooligomerization//GO:0034204lipidtranslocation//GO:0042908xenobiotictransport//GO:0043129surfactanthomeostasis//GO:0044267cellularproteinmet…	GO:0005615extracellularspace//GO:0005765lysosomalmembrane//GO:0005770lateendosome//GO:0005886plasmamembrane//GO:0016021integralcomponentofmembrane//GO:0030659cytoplasmicvesiclemembrane//GO:0032585multivesicularbodymembrane//GO:0042599lamellarbody//GO:0043231intracellularmembrane-boundedorganelle//GO:0097208alveolarlamellarbody//GO:0097232lamellarbodymembrane//GO:0097233alveolarlamellarbodymembrane	GO:0005319lipidtransporteractivity//GO:0005524ATPbinding//GO:0008559ABC-typexenobiotictransporteractivity//GO:0016887ATPhydrolysisactivity//GO:0042626ATPase-coupledtransmembranetransporteractivity//GO:0120019phosphatidylcholinetransferactivity//GO:0140345phosphatidylcholineflippaseactivity	2.75319	1.46111	3.59134e-19	1.35112e-16	1.30156	0.380247	3.54308e-07	1.54397e-06	2.1153	1.08086	1.01902e-17	2.72292e-16	5.24025	6.70123	5.62214	5.20576	5.27475	6.7148	6.66722	6.72166	5.64896	5.68277	5.5347
1.08327	0.749914	0.00529231	0.69588	0.498661	-0.325867	-1.9703	-0.736847	ABCA4	chr1	93992834	93993242	-	8547	ATP binding cassette subfamily A member 4	GO:0001523retinoidmetabolicprocess//GO:0006649phospholipidtransfertomembrane//GO:0006869lipidtransport//GO:0007601visualperception//GO:0007603phototransduction,visiblelight//GO:0034633retinoltransport//GO:0042574retinalmetabolicprocess//GO:0045332phospholipidtranslocation//GO:0045494photoreceptorcellmaintenance//GO:0055085transmembranetransport	GO:0001750photoreceptoroutersegment//GO:0005783endoplasmicreticulum//GO:0005887integralcomponentofplasmamembrane//GO:0016020membrane//GO:0031410cytoplasmicvesicle//GO:0043231intracellularmembrane-boundedorganelle//GO:0097381photoreceptordiscmembrane//GO:0120202rodphotoreceptordiscmembrane	GO:0003924GTPaseactivity//GO:0005215transporteractivity//GO:0005319lipidtransporteractivity//GO:0005501retinoidbinding//GO:000550211-cisretinalbinding//GO:0005503all-transretinalbinding//GO:0005524ATPbinding//GO:0005548phospholipidtransporteractivity//GO:0016887ATPhydrolysisactivity//GO:0034632retinoltransmembranetransporteractivity//GO:0042626ATPase-coupledtransmembranetransporteractivity//GO:00…	-1.44074	-0.526807	0.123793	0.188983	-3.62683	-1.85871	0.000396863	0.00104827	2.51735	1.3319	0.00599566	0.010842	-1.01174	-1.5094	-2.86847	-0.851195	-1.17229	-1.88954	-1.22434	-1.41431	-2.20852	-3.7925	-2.60439
-1.62971	-1.54837	0.770609	0.633836	0.605632	0.160137	0.34471	0.66315	ABCA5	chr17	69244311	69247644	-	13158	ATP binding cassette subfamily A member 5	GO:0006869lipidtransport//GO:0008203cholesterolmetabolicprocess//GO:0010745negativeregulationofmacrophagederivedfoamcelldifferentiation//GO:0010874regulationofcholesterolefflux//GO:0033344cholesterolefflux//GO:0034375high-densitylipoproteinparticleremodeling//GO:0042632cholesterolhomeostasis//GO:0043691reversecholesteroltransport//GO:0055085transmembranetransport//GO:1903064positiveregulationofre…	GO:0000139Golgimembrane//GO:0005764lysosome//GO:0005765lysosomalmembrane//GO:0005770lateendosome//GO:0005794Golgiapparatus//GO:0005886plasmamembrane//GO:0016021integralcomponentofmembrane//GO:0031902lateendosomemembrane//GO:0043231intracellularmembrane-boundedorganelle	GO:0005319lipidtransporteractivity//GO:0005524ATPbinding//GO:0042626ATPase-coupledtransmembranetransporteractivity//GO:0140359ABC-typetransporteractivity	1.8593	0.894763	6.40889e-12	1.33766e-10	1.72344	0.785292	1.40331e-10	1.07781e-09	1.07883	0.109471	0.0597717	0.0887309	3.76103	4.65343	4.54254	3.74496	3.7771	4.69316	4.63913	4.62799	4.452	4.52492	4.65071
-1.08444	-1.10753	-0.475302	-0.383849	-0.416816	1.03899	1.31686	1.1121	ABCA7	chr19	1039997	1040196	+	9591	ATP binding cassette subfamily A member 7	GO:0006869lipidtransport//GO:0006909phagocytosis//GO:0007613memory//GO:0008542visuallearning//GO:0010875positiveregulationofcholesterolefflux//GO:0018149peptidecross-linking//GO:0019216regulationoflipidmetabolicprocess//GO:0033344cholesterolefflux//GO:0033700phospholipidefflux//GO:0034205amyloid-betaformation//GO:0034380high-densitylipoproteinparticleassembly//GO:0034504proteinlocalizationtonucle…	GO:0000139Golgimembrane//GO:0001891phagocyticcup//GO:0005783endoplasmicreticulum//GO:0005794Golgiapparatus//GO:0005886plasmamembrane//GO:0009986cellsurface//GO:0016021integralcomponentofmembrane//GO:0030054celljunction//GO:0031901earlyendosomemembrane//GO:0032587rufflemembrane//GO:0043231intracellularmembrane-boundedorganelle//GO:0097386glialcellprojection	GO:0005319lipidtransporteractivity//GO:0005524ATPbinding//GO:0005548phospholipidtransporteractivity//GO:0034188apolipoproteinA-Ireceptoractivity//GO:0042626ATPase-coupledtransmembranetransporteractivity//GO:0090554phosphatidylcholinefloppaseactivity//GO:0090556phosphatidylserinefloppaseactivity//GO:0140328floppaseactivity//GO:0140359ABC-typetransporteractivity	1.30121	0.379856	3.05698e-07	1.79804e-06	2.42636	1.27879	1.13956e-17	3.58236e-16	-1.86469	-0.898935	5.90138e-16	1.05865e-14	5.27069	5.65152	6.54942	5.27725	5.26414	5.62314	5.67506	5.65635	6.48299	6.64077	6.5245
-1.50232	-1.48127	0.599922	0.879104	0.0328579	1.13873	0.34384	-0.0108572	ABCA9	chr17	68974488	68976013	-	9024	ATP binding cassette subfamily A member 9	GO:0006869lipidtransport//GO:0055085transmembranetransport	GO:0016021integralcomponentofmembrane//GO:0043231intracellularmembrane-boundedorganelle	GO:0005319lipidtransporteractivity//GO:0005524ATPbinding//GO:0042626ATPase-coupledtransmembranetransporteractivity//GO:0140359ABC-typetransporteractivity	4.16679	2.05894	0.0221633	0.0428654	4.0069	2.00249	0.0281275	0.0504859	1.0399	0.0564491	0.918819	0.935027	-5.46103	-3.42249	-3.43617	-5.47178	-5.45028	-3.32447	-3.03931	-3.90369	-2.77412	-3.58605	-3.94835
-0.625709	-0.694754	1.18254	1.27982	1.15254	-0.754825	-0.825449	-0.714153	ABCB1	chr7	87503017	87504449	-	6422	ATP binding cassette subfamily B member 1	GO:0000086G2/Mtransitionofmitoticcellcycle//GO:0009410responsetoxenobioticstimulus//GO:0045332phospholipidtranslocation//GO:0046865terpenoidtransport//GO:0047484regulationofresponsetoosmoticstress//GO:0055085transmembranetransport//GO:0070633transepithelialtransport//GO:0072089stemcellproliferation//GO:0099040ceramidetranslocation//GO:0140115exportacrossplasmamembrane//GO:0150104transportacrossbl…	GO:0005654nucleoplasm//GO:0005886plasmamembrane//GO:0009986cellsurface//GO:0016020membrane//GO:0016021integralcomponentofmembrane//GO:0016324apicalplasmamembrane//GO:0070062extracellularexosome//GO:0098591externalsideofapicalplasmamembrane	GO:0005515proteinbinding//GO:0005524ATPbinding//GO:0008559ABC-typexenobiotictransporteractivity//GO:0015562effluxtransmembranetransporteractivity//GO:0022857transmembranetransporteractivity//GO:0031625ubiquitinproteinligasebinding//GO:0042626ATPase-coupledtransmembranetransporteractivity//GO:0042910xenobiotictransmembranetransporteractivity//GO:0046943carboxylicacidtransmembranetransporteractivit…	2.25593	1.17373	3.45549e-20	2.14614e-17	-1.04646	-0.0655117	0.099537	0.152531	2.36074	1.23924	1.13705e-21	9.23299e-20	7.7777	8.95133	7.71189	7.79942	7.75597	8.93722	8.99843	8.91834	7.71818	7.67374	7.74377
1.23206	1.14397	0.49891	0.338884	0.116377	-1.03145	-1.36156	-0.937186	ABCB10	chr1	229516582	229518410	-	4268	ATP binding cassette subfamily B member 10	GO:0006783hemebiosyntheticprocess//GO:0006839mitochondrialtransport//GO:0034514mitochondrialunfoldedproteinresponse//GO:0045648positiveregulationoferythrocytedifferentiation//GO:0046985positiveregulationofhemoglobinbiosyntheticprocess//GO:0048821erythrocytedevelopment//GO:0055085transmembranetransport//GO:0070455positiveregulationofhemebiosyntheticprocess	GO:0005739mitochondrion//GO:0005743mitochondrialinnermembrane//GO:0032592integralcomponentofmitochondrialmembrane	GO:0005515proteinbinding//GO:0005524ATPbinding//GO:0016887ATPhydrolysisactivity//GO:0042803proteinhomodimerizationactivity//GO:0140359ABC-typetransporteractivity	-1.29095	-0.368431	2.85527e-07	1.69403e-06	-1.97452	-0.981503	1.04846e-14	1.72144e-13	1.52951	0.613073	2.95797e-11	2.03333e-10	6.46147	6.08954	5.47897	6.4803	6.44264	6.16686	6.09844	6.00331	5.51258	5.37144	5.55288
-0.690112	0.703729	0.936825	1.00138	1.01829	-1.31208	-0.742134	-0.915894	ABCB4	chr7	87401696	87402302	-	7728	ATP binding cassette subfamily B member 4	GO:0006629lipidmetabolicprocess//GO:0032376positiveregulationofcholesteroltransport//GO:0032782bileacidsecretion//GO:0042908xenobiotictransport//GO:0045332phospholipidtranslocation//GO:0055085transmembranetransport//GO:0055088lipidhomeostasis//GO:0061092positiveregulationofphospholipidtranslocation//GO:1901557responsetofenofibrate//GO:1903413cellularresponsetobileacid//GO:2001140positiveregulatio…	GO:0005654nucleoplasm//GO:0005737cytoplasm//GO:0005829cytosol//GO:0005886plasmamembrane//GO:0005887integralcomponentofplasmamembrane//GO:0005925focaladhesion//GO:0015629actincytoskeleton//GO:0016020membrane//GO:0016021integralcomponentofmembrane//GO:0016324apicalplasmamembrane//GO:0030136clathrin-coatedvesicle//GO:0045121membraneraft//GO:0046581intercellularcanaliculus//GO:0070062extracellularexo…	GO:0005515proteinbinding//GO:0005524ATPbinding//GO:0005548phospholipidtransporteractivity//GO:0042626ATPase-coupledtransmembranetransporteractivity//GO:0042910xenobiotictransmembranetransporteractivity//GO:0090554phosphatidylcholinefloppaseactivity//GO:0090555phosphatidylethanolamineflippaseactivity//GO:0140359ABC-typetransporteractivity	1.5348	0.61805	0.0108926	0.0228282	-1.53862	-0.621637	0.032157	0.0567216	2.36147	1.23969	2.58946e-05	6.79911e-05	-0.0776822	0.540076	-0.706901	-0.517585	0.362221	0.509353	0.550101	0.560774	-0.91018	-0.550422	-0.6601
-0.433126	-0.323197	-1.31536	-0.867642	-0.494986	0.965087	1.24	1.22922	ABCB6	chr2	219209772	219210046	-	5205	ATP binding cassette subfamily B member 6 (Langereis blood group)	GO:0006778porphyrin-containingcompoundmetabolicprocess//GO:0006779porphyrin-containingcompoundbiosyntheticprocess//GO:0006878cellularcopperionhomeostasis//GO:0006879cellularironionhomeostasis//GO:0007420braindevelopment//GO:0015886hemetransport//GO:0033013tetrapyrrolemetabolicprocess//GO:0035351hemetransmembranetransport//GO:0042168hememetabolicprocess//GO:0043588skindevelopment//GO:0055085transm…	GO:0000139Golgimembrane//GO:0005654nucleoplasm//GO:0005739mitochondrion//GO:0005740mitochondrialenvelope//GO:0005741mitochondrialoutermembrane//GO:0005765lysosomalmembrane//GO:0005768endosome//GO:0005774vacuolarmembrane//GO:0005783endoplasmicreticulum//GO:0005789endoplasmicreticulummembrane//GO:0005794Golgiapparatus//GO:0005829cytosol//GO:0005886plasmamembrane//GO:0016021integralcomponentofmembra…	GO:0005524ATPbinding//GO:0015439ABC-typehemetransporteractivity//GO:0015562effluxtransmembranetransporteractivity//GO:0016887ATPhydrolysisactivity//GO:0020037hemebinding//GO:0042626ATPase-coupledtransmembranetransporteractivity//GO:0046906tetrapyrrolebinding//GO:0140359ABC-typetransporteractivity	-1.30223	-0.380983	0.0339497	0.0623135	2.07253	1.0514	4.63805e-07	1.97775e-06	-2.69891	-1.43238	6.41941e-10	3.46856e-09	1.12368	0.769796	2.17118	1.08587	1.16148	0.479059	0.787005	1.04333	2.04759	2.23668	2.22927
1.60844	1.49474	-0.547062	-0.0933392	-0.818646	-0.444914	-0.976114	-0.223099	ABCB7	chrX	75051048	75053585	-	5364	ATP binding cassette subfamily B member 7	GO:0006879cellularironionhomeostasis//GO:0015886hemetransport//GO:0016226iron-sulfurclusterassembly//GO:0034755ironiontransmembranetransport//GO:0055072ironionhomeostasis//GO:0055085transmembranetransport//GO:0070455positiveregulationofhemebiosyntheticprocess//GO:0140466iron-sulfurclusterexportfromthemitochondrion//GO:1903331positiveregulationofiron-sulfurclusterassembly//GO:1903427negativeregula…	GO:0005739mitochondrion//GO:0005743mitochondrialinnermembrane//GO:0016021integralcomponentofmembrane	GO:0005515proteinbinding//GO:0005524ATPbinding//GO:0015232hemetransmembranetransporteractivity//GO:0042626ATPase-coupledtransmembranetransporteractivity//GO:0042803proteinhomodimerizationactivity//GO:0140481ABC-typeiron-sulfurclustertransporteractivity	-1.33541	-0.41728	8.62748e-08	5.84147e-07	-1.34713	-0.429892	8.19865e-08	3.97646e-07	1.00878	0.0126117	0.807286	0.844475	5.58223	5.16387	5.15121	5.5939	5.57056	5.15141	5.24455	5.09566	5.17238	5.06333	5.21791
0.694557	1.95522	-0.445954	-0.0898521	-1.10966	-0.388973	0.369001	-0.984341	ABCB8	chr7	151028422	151028610	+	9336	ATP binding cassette subfamily B member 8	GO:0055085transmembranetransport//GO:0071805potassiumiontransmembranetransport	GO:0005654nucleoplasm//GO:0005730nucleolus//GO:0005739mitochondrion//GO:0005743mitochondrialinnermembrane//GO:0016021integralcomponentofmembrane//GO:0031966mitochondrialmembrane//GO:0043190ATP-bindingcassette(ABC)transportercomplex//GO:0062157mitochondrialATP-gatedpotassiumchannelcomplex	GO:0005515proteinbinding//GO:0005524ATPbinding//GO:0042626ATPase-coupledtransmembranetransporteractivity//GO:0140359ABC-typetransporteractivity	-1.11228	-0.153526	0.00441807	0.0101558	-1.10028	-0.137865	0.0105699	0.0209655	-1.01091	-0.0156606	0.72971	0.777734	5.91179	5.75697	5.77463	5.8597	5.96388	5.76544	5.79487	5.71059	5.77015	5.83279	5.72095
-1.1869	-1.43107	-0.102551	-0.278811	0.0269184	0.537681	0.900146	1.53459	ABCB9	chr12	122920951	122921043	-	13282	ATP binding cassette subfamily B member 9	GO:0006518peptidemetabolicprocess//GO:0015031proteintransport//GO:0015833peptidetransport//GO:0019885antigenprocessingandpresentationofendogenouspeptideantigenviaMHCclassI//GO:0035672oligopeptidetransmembranetransport//GO:0055085transmembranetransport	GO:0005764lysosome//GO:0005765lysosomalmembrane//GO:0005789endoplasmicreticulummembrane//GO:0016021integralcomponentofmembrane//GO:0030176integralcomponentofendoplasmicreticulummembrane//GO:0042824MHCclassIpeptideloadingcomplex//GO:0043231intracellularmembrane-boundedorganelle	GO:0005515proteinbinding//GO:0005524ATPbinding//GO:0015421ABC-typeoligopeptidetransporteractivity//GO:0015433ABC-typepeptideantigentransporteractivity//GO:0015440ABC-typepeptidetransporteractivity//GO:0022857transmembranetransporteractivity//GO:0042288MHCclassIproteinbinding//GO:0042626ATPase-coupledtransmembranetransporteractivity//GO:0042803proteinhomodimerizationactivity//GO:0046978TAP1binding	1.2977	0.37596	0.000539941	0.00153487	1.66533	0.735809	6.58561e-08	3.23855e-07	-1.28329	-0.35985	0.000109071	0.000260491	2.96606	3.34353	3.69504	3.00476	2.92737	3.34847	3.2926	3.38951	3.55141	3.6663	3.86741
-1.5938	-1.06576	-0.126505	-0.00948742	-0.128788	0.480348	1.41437	1.02962	ABCC1	chr16	15949138	15949260	+	8736	ATP binding cassette subfamily C member 1	GO:0006691leukotrienemetabolicprocess//GO:0009235cobalaminmetabolicprocess//GO:0009410responsetoxenobioticstimulus//GO:0015698inorganicaniontransport//GO:0015889cobalamintransport//GO:0034599cellularresponsetooxidativestress//GO:0034775glutathionetransmembranetransport//GO:0042167hemecatabolicprocess//GO:0042908xenobiotictransport//GO:0045332phospholipidtranslocation//GO:0050729positiveregulation…	GO:0005886plasmamembrane//GO:0005887integralcomponentofplasmamembrane//GO:0009925basalplasmamembrane//GO:0016020membrane//GO:0016323basolateralplasmamembrane//GO:0016324apicalplasmamembrane//GO:0016328lateralplasmamembrane//GO:0070062extracellularexosome	GO:0005524ATPbinding//GO:0008559ABC-typexenobiotictransporteractivity//GO:0015420ABC-typevitaminB12transporteractivity//GO:0015431ABC-typeglutathioneS-conjugatetransporteractivity//GO:0015562effluxtransmembranetransporteractivity//GO:0016787hydrolaseactivity//GO:0034040ATPase-coupledlipidtransmembranetransporteractivity//GO:0034634glutathionetransmembranetransporteractivity//GO:0042626ATPase-coup…	1.12296	0.167302	0.000843718	0.00229451	1.24062	0.31106	3.83554e-07	1.66084e-06	-1.10478	-0.143758	0.00115723	0.00235088	6.4751	6.64234	6.78554	6.43954	6.51067	6.63719	6.65295	6.63688	6.71894	6.84476	6.79293
-1.26383	-1.43432	0.0817566	-0.225231	-0.200171	0.790642	1.33659	0.914559	ABCC10	chr6	43427366	43427389	+	8087	ATP binding cassette subfamily C member 10	GO:0006691leukotrienemetabolicprocess//GO:0015698inorganicaniontransport//GO:0042908xenobiotictransport//GO:0055085transmembranetransport//GO:0071716leukotrienetransport	GO:0005765lysosomalmembrane//GO:0005886plasmamembrane//GO:0016020membrane//GO:0016021integralcomponentofmembrane//GO:0016323basolateralplasmamembrane	GO:0005524ATPbinding//GO:0008559ABC-typexenobiotictransporteractivity//GO:0015431ABC-typeglutathioneS-conjugatetransporteractivity//GO:0042626ATPase-coupledtransmembranetransporteractivity//GO:0043225ATPase-coupledinorganicaniontransmembranetransporteractivity//GO:0140359ABC-typetransporteractivity	1.33528	0.417141	1.61098e-06	8.09366e-06	1.73176	0.792237	2.2104e-11	1.97033e-10	-1.29693	-0.375095	5.13296e-07	1.74542e-06	4.29632	4.71027	5.08865	4.32491	4.26774	4.77609	4.67316	4.68156	5.01378	5.19684	5.05533
-1.32851	-0.982631	-0.0103789	-0.0572757	-0.577312	0.173404	1.26679	1.51591	ABCC11	chr16	48165773	48167366	-	8469	ATP binding cassette subfamily C member 11	GO:0015698inorganicaniontransport//GO:0015711organicaniontransport//GO:0015721bileacidandbilesalttransport//GO:0015865purinenucleotidetransport//GO:0042908xenobiotictransport//GO:0055085transmembranetransport//GO:0071716leukotrienetransport	GO:0005774vacuolarmembrane//GO:0005886plasmamembrane//GO:0005887integralcomponentofplasmamembrane//GO:0016020membrane//GO:0016324apicalplasmamembrane//GO:0030659cytoplasmicvesiclemembrane//GO:0070062extracellularexosome	GO:0005524ATPbinding//GO:0008514organicaniontransmembranetransporteractivity//GO:0008559ABC-typexenobiotictransporteractivity//GO:0015216purinenucleotidetransmembranetransporteractivity//GO:0015431ABC-typeglutathioneS-conjugatetransporteractivity//GO:0015432ABC-typebileacidtransporteractivity//GO:0042626ATPase-coupledtransmembranetransporteractivity//GO:0043225ATPase-coupledinorganicaniontransmem…	1.36999	0.454165	0.106422	0.166729	2.02695	1.01931	0.000828715	0.00207179	-1.47953	-0.565142	0.0136464	0.0231572	-0.842162	-0.400625	0.162858	-0.923345	-0.760979	-0.304575	-0.32659	-0.57071	-0.218302	0.294966	0.411911
-0.773435	-0.821393	-0.682332	-0.657987	-0.679967	1.12428	1.25255	1.23828	ABCC2	chr10	99782640	99782877	+	7837	ATP binding cassette subfamily C member 2	GO:0006855xenobiotictransmembranetransport//GO:0006954inflammatoryresponse//GO:0006979responsetooxidativestress//GO:0007565femalepregnancy//GO:0009408responsetoheat//GO:0010629negativeregulationofgeneexpression//GO:0015694mercuryiontransport//GO:0015698inorganicaniontransport//GO:0015721bileacidandbilesalttransport//GO:0015722canalicularbileacidtransport//GO:0015723bilirubintransport//GO:0015732p…	GO:0005886plasmamembrane//GO:0005887integralcomponentofplasmamembrane//GO:0009986cellsurface//GO:0016020membrane//GO:0016324apicalplasmamembrane//GO:0031526brushbordermembrane//GO:0046581intercellularcanaliculus//GO:0046691intracellularcanaliculus	GO:0005515proteinbinding//GO:0005524ATPbinding//GO:0008514organicaniontransmembranetransporteractivity//GO:0008559ABC-typexenobiotictransporteractivity//GO:0015127bilirubintransmembranetransporteractivity//GO:0015431ABC-typeglutathioneS-conjugatetransporteractivity//GO:0019904proteindomainspecificbinding//GO:0042626ATPase-coupledtransmembranetransporteractivity//GO:0042910xenobiotictransmembranet…	1.09748	0.134195	0.140256	0.209781	4.52077	2.17657	1.03027e-18	4.14634e-17	-4.11923	-2.04237	6.31181e-20	3.02809e-18	2.9022	3.03687	5.07728	2.92824	2.87615	3.0272	3.05365	3.02977	4.98956	5.12889	5.11339
-1.51522	-1.51303	0.132487	0.0285759	0.245481	0.70295	0.984731	0.934021	ABCC3	chr17	50634777	50634810	+	9615	ATP binding cassette subfamily C member 3	GO:0006855xenobiotictransmembranetransport//GO:0015698inorganicaniontransport//GO:0015721bileacidandbilesalttransport//GO:0015779glucuronosidetransport//GO:0042908xenobiotictransport//GO:0055085transmembranetransport//GO:0071716leukotrienetransport//GO:0150104transportacrossblood-brainbarrier	GO:0005886plasmamembrane//GO:0016020membrane//GO:0016021integralcomponentofmembrane//GO:0016323basolateralplasmamembrane	GO:0005524ATPbinding//GO:0008559ABC-typexenobiotictransporteractivity//GO:0015164glucuronosidetransmembranetransporteractivity//GO:0015431ABC-typeglutathioneS-conjugatetransporteractivity//GO:0015432ABC-typebileacidtransporteractivity//GO:0042626ATPase-coupledtransmembranetransporteractivity//GO:0042910xenobiotictransmembranetransporteractivity//GO:0043225ATPase-coupledinorganicaniontransmembrane…	2.2273	1.1553	3.51715e-14	1.54835e-12	3.19636	1.67643	1.17762e-17	3.69694e-16	-1.43508	-0.521135	7.64275e-10	4.07775e-09	4.24974	5.4067	5.92456	4.24898	4.25051	5.40458	5.3317	5.48383	5.80467	6.00229	5.96673
-0.423984	-0.435879	1.16884	1.25323	1.12777	-0.941227	-0.931932	-0.81682	ABCC4	chr13	95019835	95021682	-	8629	ATP binding cassette subfamily C member 4	GO:0002576plateletdegranulation//GO:0009410responsetoxenobioticstimulus//GO:0010243responsetoorganonitrogencompound//GO:0014070responsetoorganiccycliccompound//GO:0015698inorganicaniontransport//GO:0015721bileacidandbilesalttransport//GO:0015732prostaglandintransport//GO:0015747uratetransport//GO:0032310prostaglandinsecretion//GO:0034775glutathionetransmembranetransport//GO:0038183bileacidsignali…	GO:0005886plasmamembrane//GO:0016020membrane//GO:0016021integralcomponentofmembrane//GO:0016323basolateralplasmamembrane//GO:0016324apicalplasmamembrane//GO:0031088plateletdensegranulemembrane//GO:0098591externalsideofapicalplasmamembrane	GO:0001409guaninenucleotidetransmembranetransporteractivity//GO:0005515proteinbinding//GO:0005524ATPbinding//GO:0008559ABC-typexenobiotictransporteractivity//GO:0015132prostaglandintransmembranetransporteractivity//GO:0015143uratetransmembranetransporteractivity//GO:0015216purinenucleotidetransmembranetransporteractivity//GO:0015431ABC-typeglutathioneS-conjugatetransporteractivity//GO:0015432ABC-…	3.17818	1.6682	2.01282e-19	8.89513e-17	-1.39441	-0.479654	2.5994e-07	1.15764e-06	4.43168	2.14785	5.72525e-22	5.06024e-20	4.58681	6.25446	4.10434	4.59296	4.58067	6.23953	6.32677	6.19707	4.05827	4.06787	4.18687
-1.64778	-1.54171	0.621346	0.481582	0.6199	0.146262	0.581035	0.73937	ABCC5	chr3	183919934	183921401	-	11365	ATP binding cassette subfamily C member 5	GO:0015698inorganicaniontransport//GO:0015865purinenucleotidetransport//GO:0030213hyaluronanbiosyntheticprocess//GO:0034775glutathionetransmembranetransport//GO:0035351hemetransmembranetransport//GO:0042908xenobiotictransport//GO:0055085transmembranetransport//GO:0070730cAMPtransport//GO:0070731cGMPtransport//GO:0098838folatetransmembranetransport//GO:0140115exportacrossplasmamembrane//GO:0150104…	GO:0005796Golgilumen//GO:0005886plasmamembrane//GO:0005887integralcomponentofplasmamembrane//GO:0010008endosomemembrane//GO:0016020membrane//GO:0016323basolateralplasmamembrane//GO:0016324apicalplasmamembrane	GO:0005524ATPbinding//GO:0008514organicaniontransmembranetransporteractivity//GO:0008559ABC-typexenobiotictransporteractivity//GO:0015216purinenucleotidetransmembranetransporteractivity//GO:0015232hemetransmembranetransporteractivity//GO:0015562effluxtransmembranetransporteractivity//GO:0034634glutathionetransmembranetransporteractivity//GO:0042626ATPase-coupledtransmembranetransporteractivity//G…	1.47624	0.561929	9.03542e-11	1.34217e-09	1.45537	0.54139	2.53435e-10	1.85671e-09	1.01434	0.0205385	0.632434	0.69491	5.52652	6.08828	6.06616	5.51278	5.54025	6.10047	6.06427	6.10009	5.97743	6.09003	6.13104
1.28924	0.690066	-0.478877	0.0391107	-1.47065	0.624648	0.611699	-1.30524	ABCC6	chr16	16149565	16150241	-	6908	ATP binding cassette subfamily C member 6	GO:0006855xenobiotictransmembranetransport//GO:0007601visualperception//GO:0009410responsetoxenobioticstimulus//GO:0015867ATPtransport//GO:0030505inorganicdiphosphatetransport//GO:0030643cellularphosphateionhomeostasis//GO:0042908xenobiotictransport//GO:0055085transmembranetransport//GO:0071716leukotrienetransport	GO:0005654nucleoplasm//GO:0005789endoplasmicreticulummembrane//GO:0005886plasmamembrane//GO:0016020membrane//GO:0016021integralcomponentofmembrane//GO:0016323basolateralplasmamembrane//GO:0016324apicalplasmamembrane//GO:0016328lateralplasmamembrane	GO:0005215transporteractivity//GO:0005524ATPbinding//GO:0008559ABC-typexenobiotictransporteractivity//GO:0015431ABC-typeglutathioneS-conjugatetransporteractivity//GO:0030504inorganicdiphosphatetransmembranetransporteractivity//GO:0042626ATPase-coupledtransmembranetransporteractivity//GO:0043225ATPase-coupledinorganicaniontransmembranetransporteractivity	-1.10283	-0.14121	0.333826	0.428949	-1.06782	-0.0946623	0.528581	0.617497	-1.03279	-0.0465476	0.734122	0.781422	1.1881	1.0436	1.09814	1.21472	1.16148	1.05763	1.10365	0.969514	1.15567	1.15452	0.98421
1.23666	0.319236	0.566469	0.522205	0.582621	-1.86582	-0.798499	-0.562871	ABCC6P1	chr16	18571162	18571311	+	3448	ATP binding cassette subfamily C member 6 pseudogene 1				-1.07156	-0.0997093	0.658596	0.734611	-1.75649	-0.812696	0.00504045	0.0107658	1.63919	0.712986	0.00756346	0.0134693	-0.13355	-0.231781	-0.958032	0.0704767	-0.337578	-0.227613	-0.247301	-0.220429	-1.30945	-0.834725	-0.729922
0.730557	-0.993724	0.31284	0.797634	1.02727	0.666042	-1.36638	-1.17424	ABCC8	chr11	17392498	17393128	-	27254	ATP binding cassette subfamily C member 8	GO:0001678cellularglucosehomeostasis//GO:0006813potassiumiontransport//GO:0007565femalepregnancy//GO:0007613memory//GO:0008542visuallearning//GO:0009268responsetopH//GO:0009410responsetoxenobioticstimulus//GO:0010043responsetozincion//GO:0010989negativeregulationoflow-densitylipoproteinparticleclearance//GO:0016525negativeregulationofangiogenesis//GO:0032496responsetolipopolysaccharide//GO:003276…	GO:0005739mitochondrion//GO:0005886plasmamembrane//GO:0008282inwardrectifyingpotassiumchannel//GO:0016020membrane//GO:0030672synapticvesiclemembrane//GO:0031004potassiumion-transportingATPasecomplex//GO:0042383sarcolemma	GO:0005267potassiumchannelactivity//GO:0005524ATPbinding//GO:0008281sulfonylureareceptoractivity//GO:0015272ATP-activatedinwardrectifierpotassiumchannelactivity//GO:0019829ATPase-coupledcationtransmembranetransporteractivity//GO:0042626ATPase-coupledtransmembranetransporteractivity//GO:0044325transmembranetransporterbinding//GO:0140359ABC-typetransporteractivity	1.33268	0.414328	0.292341	0.384259	-1.21187	-0.277236	0.531703	0.620577	1.61503	0.691565	0.07757	0.112068	-1.8999	-1.46316	-2.1551	-1.45386	-2.34594	-1.66997	-1.41916	-1.30035	-1.48724	-2.53874	-2.43933
-1.40198	-1.69681	0.781677	0.696672	0.900315	0.053365	0.441112	0.22565	ABCD1	chrX	153724856	153726166	+	4238	ATP binding cassette subfamily D member 1	GO:0000038verylong-chainfattyacidmetabolicprocess//GO:0002082regulationofoxidativephosphorylation//GO:0006635fattyacidbeta-oxidation//GO:0007031peroxisomeorganization//GO:0015910long-chainfattyacidimportintoperoxisome//GO:0015916fatty-acyl-CoAtransport//GO:0015919peroxisomalmembranetransport//GO:0030497fattyacidelongation//GO:0031998regulationoffattyacidbeta-oxidation//GO:0032000positiveregulatio…	GO:0005737cytoplasm//GO:0005765lysosomalmembrane//GO:0005777peroxisome//GO:0005778peroxisomalmembrane//GO:0005779integralcomponentofperoxisomalmembrane//GO:0005789endoplasmicreticulummembrane//GO:0005829cytosol//GO:0016020membrane//GO:0031966mitochondrialmembrane//GO:0048471perinuclearregionofcytoplasm	GO:0005324long-chainfattyacidtransporteractivity//GO:0005515proteinbinding//GO:0005524ATPbinding//GO:0015607ABC-typefatty-acyl-CoAtransporteractivity//GO:0016887ATPhydrolysisactivity//GO:0019899enzymebinding//GO:0042626ATPase-coupledtransmembranetransporteractivity//GO:0042802identicalproteinbinding//GO:0042803proteinhomodimerizationactivity//GO:0043531ADPbinding//GO:0046982proteinheterodimerizat…	1.73129	0.791849	3.77341e-09	3.59655e-08	1.52275	0.606681	6.6613e-07	2.77816e-06	1.13695	0.185168	0.0140843	0.0238386	2.69454	3.48811	3.3008	2.74448	2.64459	3.48431	3.45551	3.52451	3.23756	3.36893	3.29593
-0.704617	-1.37132	-0.315059	0.191254	-0.858215	1.18795	0.391436	1.47858	ABCD3	chr1	94418389	94418588	+	7655	ATP binding cassette subfamily D member 3	GO:0000038verylong-chainfattyacidmetabolicprocess//GO:0006633fattyacidbiosyntheticprocess//GO:0006635fattyacidbeta-oxidation//GO:0006699bileacidbiosyntheticprocess//GO:0007031peroxisomeorganization//GO:0009410responsetoxenobioticstimulus//GO:0014070responsetoorganiccycliccompound//GO:0015721bileacidandbilesalttransport//GO:0015910long-chainfattyacidimportintoperoxisome//GO:0042760verylong-chainfa…	GO:0005739mitochondrion//GO:0005777peroxisome//GO:0005778peroxisomalmembrane//GO:0005782peroxisomalmatrix//GO:0005829cytosol//GO:0016020membrane//GO:0016021integralcomponentofmembrane//GO:0043231intracellularmembrane-boundedorganelle	GO:0005324long-chainfattyacidtransporteractivity//GO:0005515proteinbinding//GO:0005524ATPbinding//GO:0016887ATPhydrolysisactivity//GO:0042626ATPase-coupledtransmembranetransporteractivity//GO:0042803proteinhomodimerizationactivity//GO:0043621proteinself-association//GO:0047617acyl-CoAhydrolaseactivity//GO:0140359ABC-typetransporteractivity	1.03374	0.0478755	0.243193	0.330235	1.09996	0.137455	0.00252904	0.00574338	-1.06406	-0.0895793	0.0207218	0.0338658	6.86018	6.90757	6.99737	6.88241	6.83795	6.90839	6.94215	6.87217	7.00862	6.9555	7.028
-1.41042	-1.62737	0.671681	0.433257	0.863711	0.0672368	0.986287	0.0156152	ABCD4	chr14	74285269	74286529	-	8922	ATP binding cassette subfamily D member 4	GO:0006635fattyacidbeta-oxidation//GO:0007031peroxisomeorganization//GO:0009235cobalaminmetabolicprocess//GO:0015889cobalamintransport//GO:0015910long-chainfattyacidimportintoperoxisome//GO:0042760verylong-chainfattyacidcatabolicprocess//GO:0055085transmembranetransport//GO:1990830cellularresponsetoleukemiainhibitoryfactor	GO:0005765lysosomalmembrane//GO:0005777peroxisome//GO:0005778peroxisomalmembrane//GO:0005789endoplasmicreticulummembrane//GO:0016021integralcomponentofmembrane//GO:0043190ATP-bindingcassette(ABC)transportercomplex	GO:0005324long-chainfattyacidtransporteractivity//GO:0005515proteinbinding//GO:0005524ATPbinding//GO:0015420ABC-typevitaminB12transporteractivity//GO:0042626ATPase-coupledtransmembranetransporteractivity//GO:0140359ABC-typetransporteractivity	1.19649	0.258811	3.00948e-05	0.000112985	1.16721	0.223063	0.000221765	0.000612887	1.02509	0.0357481	0.427076	0.500062	5.27501	5.53431	5.49856	5.28794	5.26208	5.53615	5.50773	5.55904	5.4641	5.57366	5.45794
1.59363	1.28144	0.183367	0.0877319	-0.365322	-0.912754	-1.11498	-0.753109	ABCE1	chr4	145098288	145098419	+	6254	ATP binding cassette subfamily E member 1	GO:0000054ribosomalsubunitexportfromnucleus//GO:0006413translationalinitiation//GO:0006415translationaltermination//GO:0006417regulationoftranslation//GO:0060702negativeregulationofendoribonucleaseactivity	GO:0005737cytoplasm//GO:0005739mitochondrion//GO:0005759mitochondrialmatrix//GO:0005829cytosol//GO:0016020membrane	GO:0005506ironionbinding//GO:0005515proteinbinding//GO:0005524ATPbinding//GO:0043024ribosomalsmallsubunitbinding//GO:00515394iron,4sulfurclusterbinding//GO:0060698endoribonucleaseinhibitoractivity	-1.32255	-0.40332	1.81435e-08	1.45579e-07	-1.57268	-0.653221	4.41293e-12	4.4595e-11	1.18913	0.249901	1.3697e-05	3.73866e-05	6.80569	6.3995	6.15187	6.84885	6.76252	6.45889	6.43244	6.30717	6.15579	6.09987	6.19994
0.913454	0.625098	0.334764	1.17895	0.301059	-1.38835	-0.579912	-1.38507	ABCF1	chr6	30571393	30571560	+	4496	ATP binding cassette subfamily F member 1	GO:0006412translation//GO:0006954inflammatoryresponse	GO:0005635nuclearenvelope//GO:0005654nucleoplasm//GO:0005829cytosol//GO:0005840ribosome//GO:0016020membrane	GO:0003723RNAbinding//GO:0005515proteinbinding//GO:0005524ATPbinding//GO:0008135translationfactoractivity,RNAbinding	-1.01243	-0.0178184	0.689003	0.76085	-1.15046	-0.202216	0.000188795	0.000528505	1.13634	0.184398	0.000160913	0.000373814	6.41041	6.39282	6.20845	6.42584	6.39498	6.36391	6.45425	6.3603	6.1795	6.26602	6.17985
0.910449	0.376215	0.83487	1.10109	0.119396	-0.743437	-1.00191	-1.59668	ABCF2	chr7	151211484	151214191	-	5158	ATP binding cassette subfamily F member 2		GO:0016020membrane	GO:0005524ATPbinding	1.0067	0.00963001	0.868302	0.903433	-1.22112	-0.288199	9.30287e-05	0.000273516	1.22929	0.297829	1.7149e-05	4.61511e-05	5.02378	5.03057	4.73826	5.06718	4.98038	5.0549	5.09816	4.93866	4.79847	4.75647	4.65984
-1.32296	-0.951746	-0.162415	-0.346272	-0.513503	1.3564	1.29538	0.645112	ABCF3	chr3	184186095	184186280	+	5135	ATP binding cassette subfamily F member 3	GO:0051607defenseresponsetovirus	GO:0016020membrane	GO:0005515proteinbinding//GO:0005524ATPbinding//GO:0045296cadherinbinding	1.08602	0.119051	0.0164496	0.0328564	1.25658	0.329504	3.60614e-07	1.56919e-06	-1.15705	-0.210453	3.48736e-05	8.9762e-05	5.91706	6.03486	6.24775	5.88961	5.94451	6.06123	6.03404	6.00931	6.28582	6.2768	6.18064
-1.32558	-1.7961	0.562038	0.134955	0.946435	0.353776	0.440493	0.683983	ABCG1	chr21	42199689	42199849	+	6121	ATP binding cassette subfamily G member 1	GO:0008203cholesterolmetabolicprocess//GO:0010033responsetoorganicsubstance//GO:0010745negativeregulationofmacrophagederivedfoamcelldifferentiation//GO:0010872regulationofcholesterolesterification//GO:0010875positiveregulationofcholesterolefflux//GO:0010887negativeregulationofcholesterolstorage//GO:0032367intracellularcholesteroltransport//GO:0033344cholesterolefflux//GO:0033700phospholipidefflux…	GO:0000139Golgimembrane//GO:0005739mitochondrion//GO:0005768endosome//GO:0005789endoplasmicreticulummembrane//GO:0005794Golgiapparatus//GO:0005886plasmamembrane//GO:0009897externalsideofplasmamembrane//GO:0016021integralcomponentofmembrane//GO:0055037recyclingendosome	GO:0005515proteinbinding//GO:0005524ATPbinding//GO:0005543phospholipidbinding//GO:0015485cholesterolbinding//GO:0019534toxintransmembranetransporteractivity//GO:0034041ABC-typesteroltransporteractivity//GO:0042803proteinhomodimerizationactivity//GO:0043531ADPbinding//GO:0046982proteinheterodimerizationactivity//GO:0090554phosphatidylcholinefloppaseactivity//GO:0120020cholesteroltransferactivity//…	4.18776	2.06618	0.013239	0.0271032	4.08648	2.03086	0.0165448	0.0313774	1.02478	0.0353192	0.94385	0.95545	-5.21832	-3.1392	-3.19348	-4.98635	-5.45028	-3.12517	-3.54627	-2.74615	-3.33051	-3.24501	-3.00493
-1.59587	-1.58635	0.763749	0.675077	0.126565	0.515345	0.482153	0.619334	ABCG4	chr11	119149052	119149363	+	6231	ATP binding cassette subfamily G member 4	GO:0033344cholesterolefflux//GO:0042632cholesterolhomeostasis//GO:0055085transmembranetransport//GO:1990830cellularresponsetoleukemiainhibitoryfactor	GO:0005886plasmamembrane//GO:0010008endosomemembrane//GO:0016021integralcomponentofmembrane//GO:0031410cytoplasmicvesicle	GO:0005515proteinbinding//GO:0005524ATPbinding//GO:0016887ATPhydrolysisactivity//GO:0034041ABC-typesteroltransporteractivity//GO:0042802identicalproteinbinding//GO:0042803proteinhomodimerizationactivity//GO:0046982proteinheterodimerizationactivity	28.4941	4.83259	0.000123932	0.000404496	28.1805	4.81663	0.00014214	0.000406265	1.01113	0.015967	0.974832	0.980291	-7.78296	-3.01109	-2.97236	-7.79371	-7.77221	-2.46465	-2.66491	-3.90369	-3.02566	-3.10062	-2.7908
-0.120209	-1.04669	1.41068	0.754243	0.492709	0.690593	-0.749828	-1.4315	ABCG5	chr2	43812472	43813309	-	3720	ATP binding cassette subfamily G member 5	GO:0007584responsetonutrient//GO:0007588excretion//GO:0009410responsetoxenobioticstimulus//GO:0010212responsetoionizingradiation//GO:0010949negativeregulationofintestinalphytosterolabsorption//GO:0014850responsetomuscleactivity//GO:0015918steroltransport//GO:0030299intestinalcholesterolabsorption//GO:0033344cholesterolefflux//GO:0038183bileacidsignalingpathway//GO:0042632cholesterolhomeostasis//G…	GO:0005886plasmamembrane//GO:0005887integralcomponentofplasmamembrane//GO:0016324apicalplasmamembrane//GO:0043190ATP-bindingcassette(ABC)transportercomplex//GO:0043235receptorcomplex	GO:0005515proteinbinding//GO:0005524ATPbinding//GO:0016887ATPhydrolysisactivity//GO:0042626ATPase-coupledtransmembranetransporteractivity//GO:0046872metalionbinding//GO:0046982proteinheterodimerizationactivity//GO:0120020cholesteroltransferactivity//GO:0140359ABC-typetransporteractivity	2.67574	1.41994	0.0637207	0.107535	1.03153	0.0447865	0.957544	0.969099	2.59395	1.37515	0.0450399	0.0686533	-4.52906	-3.1468	-4.44765	-4.09327	-4.96485	-2.6531	-3.27063	-3.51667	-3.33051	-4.68558	-5.32686
-2.09535	-0.679817	0.479058	0.313204	0.0480345	0.0792051	1.13929	0.71638	ABHD1	chr2	27123789	27124062	+	4630	abhydrolase domain containing 1	GO:0008150biological_process//GO:0044255cellularlipidmetabolicprocess//GO:0051792medium-chainfattyacidbiosyntheticprocess//GO:0051793medium-chainfattyacidcatabolicprocess	GO:0016021integralcomponentofmembrane	GO:0003674molecular_function//GO:0005515proteinbinding//GO:0008126acetylesteraseactivity//GO:0034338short-chaincarboxylesteraseactivity//GO:0047372acylglycerollipaseactivity	1.72951	0.790365	0.0197598	0.0386485	1.9398	0.955911	0.00658752	0.0136947	-1.12159	-0.165545	0.500703	0.572644	-1.53266	-0.754363	-0.584086	-1.86297	-1.20235	-0.66151	-0.738913	-0.862666	-0.848119	-0.353385	-0.550753
1.81495	0.930567	-0.0448678	0.435629	-0.853925	-0.496355	-1.0902	-0.695796	ABHD10	chr3	111979010	111979203	+	3026	abhydrolase domain containing 10, depalmitoylase	GO:0002084proteindepalmitoylation//GO:0019391glucuronosidecatabolicprocess//GO:0052695cellularglucuronidation	GO:0005739mitochondrion//GO:0005759mitochondrialmatrix//GO:0005829cytosol	GO:0004553hydrolaseactivity,hydrolyzingO-glycosylcompounds//GO:0008474palmitoyl-(protein)hydrolaseactivity//GO:0102390mycophenolicacidacyl-glucuronideesteraseactivity	-1.11541	-0.157576	0.00442765	0.0101737	-1.16695	-0.222747	0.000247252	0.000678024	1.04621	0.0651709	0.174117	0.23014	5.68925	5.53001	5.46678	5.73536	5.64314	5.54143	5.59153	5.45707	5.49435	5.43243	5.47356
0.372742	0.357234	-1.11243	-1.25151	-1.14235	0.946581	1.0803	0.749432	ABHD11	chr7	73736094	73736691	-	2274	abhydrolase domain containing 11	GO:0008150biological_process	GO:0005575cellular_component//GO:0005739mitochondrion	GO:0003674molecular_function//GO:0016787hydrolaseactivity	-1.58338	-0.663006	5.52227e-12	1.17176e-10	1.18197	0.241196	4.79545e-05	0.000147797	-1.87151	-0.904202	1.30568e-15	2.17424e-14	5.80017	5.13661	6.04265	5.80353	5.79682	5.16098	5.10081	5.14804	6.05179	6.10965	5.9665
-0.67531	-0.695894	-0.978098	-0.703185	-0.519956	1.17823	1.40184	0.992377	ABHD11-AS1	chr7	73734994	73735090	+	757	ABHD11 antisense RNA 1 (tail to tail)				-1.05232	-0.0735733	0.759123	0.817616	3.83679	1.9399	3.14057e-09	1.91993e-08	-4.03753	-2.01347	8.65469e-11	5.45488e-10	-0.124905	-0.174845	1.8215	-0.114229	-0.135581	-0.42831	-0.143144	0.0469188	1.80844	2.04039	1.61566
-0.955209	-1.55852	1.26482	1.06416	0.779923	-0.0743908	0.0370723	-0.557856	ABHD12	chr20	25294742	25295030	-	4479	abhydrolase domain containing 12, lysophospholipase	GO:0002084proteindepalmitoylation//GO:0006660phosphatidylserinecatabolicprocess//GO:0007628adultwalkingbehavior//GO:0009395phospholipidcatabolicprocess//GO:0010996responsetoauditorystimulus//GO:0019369arachidonicacidmetabolicprocess//GO:0046464acylglycerolcatabolicprocess//GO:0046475glycerophospholipidcatabolicprocess//GO:0050727regulationofinflammatoryresponse//GO:0052651monoacylglycerolcataboli…	GO:0005789endoplasmicreticulummembrane//GO:0005886plasmamembrane//GO:0016020membrane//GO:0016021integralcomponentofmembrane//GO:0032281AMPAglutamatereceptorcomplex//GO:0032839dendritecytoplasm	GO:0004620phospholipaseactivity//GO:0004622lysophospholipaseactivity//GO:0008474palmitoyl-(protein)hydrolaseactivity//GO:0047372acylglycerollipaseactivity	1.30954	0.389056	2.59504e-08	2.00585e-07	1.13106	0.177677	0.00115174	0.00280005	1.15779	0.211378	4.13346e-05	0.000105202	6.06923	6.45679	6.24812	6.12021	6.01824	6.49541	6.4615	6.41346	6.26907	6.28791	6.18736
0.565329	0.561902	-1.03772	-1.15137	-1.39423	0.827225	0.875321	0.753534	ABHD12B	chr14	50872053	50872278	+	4551	abhydrolase domain containing 12B	GO:0006660phosphatidylserinecatabolicprocess//GO:0052651monoacylglycerolcatabolicprocess//GO:0098734macromoleculedepalmitoylation	GO:0005789endoplasmicreticulummembrane//GO:0016020membrane	GO:0004622lysophospholipaseactivity//GO:0008474palmitoyl-(protein)hydrolaseactivity//GO:0047372acylglycerollipaseactivity	-2.11433	-1.0802	2.52754e-12	6.03771e-11	1.11495	0.156978	0.0328612	0.0578438	-2.35737	-1.23718	3.76548e-14	4.5735e-13	3.84953	2.75936	4.00771	3.8506	3.84847	2.85654	2.78606	2.63547	4.013	4.04283	3.9673
-0.898575	-1.24782	1.21916	1.27027	0.873272	-0.467335	-0.744692	-0.00427863	ABHD13	chr13	108218392	108218659	+	5313	abhydrolase domain containing 13	GO:0002084proteindepalmitoylation	GO:0016020membrane//GO:0016021integralcomponentofmembrane//GO:0032839dendritecytoplasm	GO:0008474palmitoyl-(protein)hydrolaseactivity	1.37966	0.464308	1.02121e-08	8.66273e-08	1.10377	0.142441	0.015861	0.0302026	1.24995	0.321867	7.02914e-07	2.34203e-06	5.25775	5.72059	5.39861	5.29458	5.22091	5.74132	5.7521	5.66835	5.38555	5.32704	5.48323
-0.863054	-0.925875	-0.131954	0.911301	1.96585	0.0860443	-0.261527	-0.780788	ABHD14A	chr3	51971426	51971817	+	2313	abhydrolase domain containing 14A		GO:0005737cytoplasm//GO:0016021integralcomponentofmembrane	GO:0016787hydrolaseactivity	1.2054	0.269511	0.0116313	0.0242065	1.06238	0.0873048	0.409153	0.504255	1.13462	0.182206	0.0533504	0.0800517	2.73954	3.02418	2.8301	2.74448	2.7346	2.85948	3.02359	3.18947	2.89377	2.8391	2.75742
-1.05281	0.0187902	-0.181564	-1.39068	-0.466353	0.705624	0.732072	1.63492	ABHD14A-ACY1	chr3	51974706	51974840	+	4761	ABHD14A-ACY1 readthrough				-1.05269	-0.0740823	0.82104	0.867073	1.81859	0.86282	0.00908743	0.0182879	-1.91441	-0.936902	0.00196178	0.00383414	-1.12418	-1.21351	-0.27709	-1.41867	-0.829691	-0.939811	-1.60437	-1.09634	-0.45219	-0.437654	0.0585741
-0.10405	-0.243992	0.86893	0.852528	1.5254	-0.75166	-0.71946	-1.4277	ABHD14B	chr3	51968510	51969605	-	3161	abhydrolase domain containing 14B	GO:0045944positiveregulationoftranscriptionbyRNApolymeraseII//GO:00504273'-phosphoadenosine5'-phosphosulfatemetabolicprocess	GO:0005634nucleus//GO:0005654nucleoplasm//GO:0005730nucleolus//GO:0005737cytoplasm//GO:0005829cytosol//GO:0070062extracellularexosome	GO:0005515proteinbinding//GO:0016787hydrolaseactivity	1.14545	0.195909	0.00029529	0.00088483	-1.09137	-0.126142	0.0139782	0.0269595	1.25011	0.322051	1.12507e-07	4.23699e-07	6.34399	6.54184	6.21921	6.35501	6.33297	6.50824	6.50566	6.61163	6.25301	6.25808	6.14654
1.03934	0.925979	0.556678	0.32042	0.647393	-0.879269	-1.14706	-1.46348	ABHD15	chr17	29560547	29563086	-	3492	abhydrolase domain containing 15	GO:0044255cellularlipidmetabolicprocess	GO:0005576extracellularregion//GO:0016020membrane	GO:0005515proteinbinding//GO:0034338short-chaincarboxylesteraseactivity//GO:0047372acylglycerollipaseactivity	-1.06778	-0.0946117	0.0713939	0.118457	-1.3457	-0.428358	4.65103e-08	2.34131e-07	1.26028	0.333746	5.6614e-07	1.91463e-06	5.23994	5.14567	4.8136	5.2512	5.22867	5.15531	5.10837	5.17333	4.87003	4.81682	4.75396
-0.31488	-2.06804	0.034577	-0.213251	1.21429	0.409641	-0.0289105	0.966569	ABHD16A	chr6	31686955	31687295	-	4059	abhydrolase domain containing 16A, phospholipase	GO:0006660phosphatidylserinecatabolicprocess//GO:0052651monoacylglycerolcatabolicprocess//GO:0098734macromoleculedepalmitoylation//GO:1905344prostaglandincatabolicprocess	GO:0016020membrane//GO:0016021integralcomponentofmembrane	GO:0004620phospholipaseactivity//GO:0005515proteinbinding//GO:0008474palmitoyl-(protein)hydrolaseactivity//GO:0047372acylglycerollipaseactivity	1.16584	0.221369	0.0598154	0.101879	1.18655	0.246775	0.0438711	0.0746175	-1.01777	-0.0254063	0.800245	0.838751	2.17732	2.40687	2.42239	2.30827	2.04638	2.36047	2.32345	2.5367	2.4165	2.35098	2.49969
0.735764	0.957036	0.331494	0.700396	0.635256	-1.33291	-0.418683	-1.60835	ABHD17A	chr19	1876810	1877425	-	6163	abhydrolase domain containing 17A, depalmitoylase	GO:0002084proteindepalmitoylation//GO:0072657proteinlocalizationtomembrane//GO:0099175regulationofpostsynapseorganization//GO:1902817negativeregulationofproteinlocalizationtomicrotubule//GO:1905668positiveregulationofproteinlocalizationtoendosome	GO:0005886plasmamembrane//GO:0010008endosomemembrane//GO:0016020membrane//GO:0016607nuclearspeck//GO:0043197dendriticspine//GO:0043231intracellularmembrane-boundedorganelle//GO:0055038recyclingendosomemembrane//GO:0098978glutamatergicsynapse//GO:0099031anchoredcomponentofpostsynapticdensitymembrane//GO:0099033anchoredcomponentofpostsynapticrecyclingendosomemembrane	GO:0005515proteinbinding//GO:0008474palmitoyl-(protein)hydrolaseactivity	-1.0182	-0.026017	0.595341	0.678786	-1.12632	-0.171622	0.00236906	0.00540679	1.10619	0.145605	0.00379239	0.00709048	5.33922	5.31395	5.16826	5.3296	5.34884	5.29445	5.32653	5.32087	5.14974	5.22923	5.1258
-0.86053	-1.24429	1.30103	1.42301	0.529281	-0.500411	-0.679727	0.031634	ABHD17B	chr9	71862452	71862607	-	3221	abhydrolase domain containing 17B, depalmitoylase	GO:0002084proteindepalmitoylation//GO:0099175regulationofpostsynapseorganization//GO:1902473regulationofproteinlocalizationtosynapse//GO:1902817negativeregulationofproteinlocalizationtomicrotubule//GO:1902950regulationofdendriticspinemaintenance//GO:1905668positiveregulationofproteinlocalizationtoendosome	GO:0005886plasmamembrane//GO:0010008endosomemembrane//GO:0016020membrane//GO:0043197dendriticspine//GO:0055038recyclingendosomemembrane//GO:0098978glutamatergicsynapse//GO:0099031anchoredcomponentofpostsynapticdensitymembrane//GO:0099033anchoredcomponentofpostsynapticrecyclingendosomemembrane	GO:0008474palmitoyl-(protein)hydrolaseactivity	1.15735	0.210827	0.000503463	0.00144044	1.0471	0.0663961	0.228401	0.311771	1.10529	0.144431	0.0056166	0.0101999	4.90499	5.11393	4.97046	4.92375	4.88623	5.13511	5.14704	5.05965	4.95896	4.94143	5.01099
-0.181674	-0.383058	-0.893988	-0.841937	-1.15156	1.24015	1.07869	1.13338	ABHD17C	chr15	80679684	80679761	+	3620	abhydrolase domain containing 17C, depalmitoylase	GO:0002084proteindepalmitoylation//GO:0099175regulationofpostsynapseorganization//GO:1902817negativeregulationofproteinlocalizationtomicrotubule//GO:1905668positiveregulationofproteinlocalizationtoendosome	GO:0005886plasmamembrane//GO:0010008endosomemembrane//GO:0043197dendriticspine//GO:0055038recyclingendosomemembrane//GO:0098839postsynapticdensitymembrane//GO:0098978glutamatergicsynapse	GO:0005515proteinbinding//GO:0008474palmitoyl-(protein)hydrolaseactivity	-1.18223	-0.241506	2.28589e-06	1.1101e-05	1.42545	0.511414	3.17058e-12	3.32693e-11	-1.6852	-0.75292	1.35595e-16	2.78959e-15	8.17909	7.93623	8.69083	8.21505	8.14314	7.96069	7.97928	7.86872	8.72276	8.6651	8.68463
1.2992	0.331437	0.562543	0.127831	0.485756	-1.67713	-1.3338	0.204164	ABHD18	chr4	127965306	127965606	+	6733	abhydrolase domain containing 18		GO:0005576extracellularregion		-1.02838	-0.0403774	0.51698	0.607994	-1.12078	-0.164497	0.0175001	0.0330065	1.08984	0.12412	0.0430921	0.0660127	4.47359	4.43298	4.30558	4.52002	4.42716	4.44934	4.40762	4.44197	4.23442	4.26737	4.41495
-1.13729	-1.13274	-0.297163	-0.397735	-0.469265	1.01633	1.22859	1.18928	ABHD2	chr15	89087459	89087516	+	10068	abhydrolase domain containing 2, acylglycerol lipase	GO:0007340acrosomereaction//GO:0009611responsetowounding//GO:0030336negativeregulationofcellmigration//GO:0032570responsetoprogesterone//GO:0043401steroidhormonemediatedsignalingpathway//GO:0044255cellularlipidmetabolicprocess//GO:0046464acylglycerolcatabolicprocess//GO:0048240spermcapacitation//GO:0051792medium-chainfattyacidbiosyntheticprocess//GO:0051793medium-chainfattyacidcatabolicprocess	GO:0001669acrosomalvesicle//GO:0016021integralcomponentofmembrane//GO:0036126spermflagellum//GO:0097524spermplasmamembrane	GO:0003707steroidhormonereceptoractivity//GO:0004806triglyceridelipaseactivity//GO:0008126acetylesteraseactivity//GO:0033878hormone-sensitivelipaseactivity//GO:0034338short-chaincarboxylesteraseactivity//GO:0042562hormonebinding//GO:0047372acylglycerollipaseactivity	1.46656	0.552439	4.43928e-12	9.74174e-11	3.20564	1.68061	1.63884e-22	2.0357e-20	-2.18581	-1.12817	2.94403e-20	1.55884e-18	9.71309	10.2635	11.3929	9.71141	9.71476	10.3305	10.2563	10.2036	11.2983	11.4547	11.4257
1.29497	1.34812	-0.241576	0.808402	-0.915997	-1.0232	-0.85941	-0.411315	ABHD3	chr18	21650901	21651763	-	4337	abhydrolase domain containing 3, phospholipase	GO:0006656phosphatidylcholinebiosyntheticprocess//GO:0044255cellularlipidmetabolicprocess//GO:0046470phosphatidylcholinemetabolicprocess//GO:0051792medium-chainfattyacidbiosyntheticprocess//GO:0051793medium-chainfattyacidcatabolicprocess	GO:0005575cellular_component//GO:0005886plasmamembrane//GO:0016021integralcomponentofmembrane	GO:0004623phospholipaseA2activity//GO:0008126acetylesteraseactivity//GO:0008970phospholipaseA1activity//GO:0034338short-chaincarboxylesteraseactivity//GO:0047372acylglycerollipaseactivity//GO:0052739phosphatidylserine1-acylhydrolaseactivity//GO:00527401-acyl-2-lysophosphatidylserineacylhydrolaseactivity	-1.12399	-0.168626	0.00546848	0.0123045	-1.18578	-0.245833	0.000254216	0.000695047	1.05497	0.0772078	0.148061	0.19958	5.3392	5.16893	5.09217	5.33606	5.34235	5.15411	5.27844	5.07425	5.06155	5.08095	5.13401
-1.68259	-1.44403	0.198765	0.264058	0.33025	0.715792	0.957931	0.659827	ABHD4	chr14	22598290	22598329	+	3765	abhydrolase domain containing 4, N-acyl phospholipase B	GO:0006654phosphatidicacidbiosyntheticprocess//GO:0016042lipidcatabolicprocess//GO:0036152phosphatidylethanolamineacyl-chainremodeling//GO:0055088lipidhomeostasis//GO:0070292N-acylphosphatidylethanolaminemetabolicprocess	GO:0005739mitochondrion//GO:0005789endoplasmicreticulummembrane//GO:0005811lipiddroplet	GO:0004622lysophospholipaseactivity//GO:0005515proteinbinding//GO:0016787hydrolaseactivity//GO:0042171lysophosphatidicacidacyltransferaseactivity//GO:0052689carboxylicesterhydrolaseactivity	1.83046	0.872208	7.75928e-13	2.20952e-11	2.17136	1.1186	5.15694e-15	9.03939e-14	-1.18623	-0.246388	3.4063e-05	8.77937e-05	4.40829	5.28193	5.52738	4.35127	4.4653	5.25057	5.28179	5.31343	5.49772	5.61346	5.47097
0.0856336	0.0014063	1.2371	1.00721	0.932332	-0.997462	-1.22187	-1.04434	ABHD5	chr3	43690108	43690202	+	7539	abhydrolase domain containing 5, lysophosphatidic acid acyltransferase	GO:0006631fattyacidmetabolicprocess//GO:0006654phosphatidicacidbiosyntheticprocess//GO:0010891negativeregulationofsequesteringoftriglyceride//GO:0010898positiveregulationoftriglyceridecatabolicprocess//GO:0030154celldifferentiation//GO:0051006positiveregulationoflipoproteinlipaseactivity//GO:0055088lipidhomeostasis	GO:0005654nucleoplasm//GO:0005739mitochondrion//GO:0005811lipiddroplet//GO:0005829cytosol//GO:0043231intracellularmembrane-boundedorganelle	GO:00038411-acylglycerol-3-phosphateO-acyltransferaseactivity//GO:0005515proteinbinding//GO:0042171lysophosphatidicacidacyltransferaseactivity//GO:0052689carboxylicesterhydrolaseactivity	1.30826	0.387647	3.42004e-07	1.99423e-06	-1.34565	-0.428308	3.45489e-07	1.50823e-06	1.76046	0.815954	2.4015e-13	2.4803e-12	4.74134	5.12566	4.31308	4.75728	4.7254	5.19312	5.10611	5.07776	4.34731	4.26237	4.32957
-1.19597	-1.26317	1.07076	1.20643	0.959507	0.0226804	-0.144515	-0.655733	ABHD6	chr3	58237532	58237916	+	3563	abhydrolase domain containing 6, acylglycerol lipase	GO:0009395phospholipidcatabolicprocess//GO:0019369arachidonicacidmetabolicprocess//GO:0030336negativeregulationofcellmigration//GO:0046464acylglycerolcatabolicprocess//GO:0046889positiveregulationoflipidbiosyntheticprocess//GO:0052651monoacylglycerolcatabolicprocess//GO:0060292long-termsynapticdepression//GO:0120163negativeregulationofcold-inducedthermogenesis//GO:2000124regulationofendocannabino…	GO:0005739mitochondrion//GO:0005765lysosomalmembrane//GO:0005886plasmamembrane//GO:0016021integralcomponentofmembrane//GO:0031902lateendosomemembrane//GO:0031966mitochondrialmembrane//GO:0032281AMPAglutamatereceptorcomplex//GO:0098978glutamatergicsynapse//GO:0098982GABA-ergicsynapse//GO:0099055integralcomponentofpostsynapticmembrane	GO:0005515proteinbinding//GO:0047372acylglycerollipaseactivity	1.37245	0.45675	3.22899e-08	2.43366e-07	1.14024	0.189333	0.0033505	0.00741902	1.20365	0.267417	1.84867e-05	4.95654e-05	4.56843	5.02471	4.76023	4.57507	4.56179	5.02311	5.04992	5.00112	4.81594	4.7829	4.68185
-0.734004	-0.355347	-0.136578	-1.33907	-0.677305	1.32573	1.44319	0.473382	ABHD8	chr19	17292131	17292831	-	2162	abhydrolase domain containing 8	GO:0006654phosphatidicacidbiosyntheticprocess//GO:0055088lipidhomeostasis	GO:0005739mitochondrion//GO:0070062extracellularexosome	GO:0005515proteinbinding//GO:0042171lysophosphatidicacidacyltransferaseactivity//GO:0052689carboxylicesterhydrolaseactivity	-1.04347	-0.061396	0.784446	0.838328	1.64214	0.715579	0.00252477	0.00573427	-1.71353	-0.776975	0.000391032	0.000857967	0.091676	0.0144876	0.817011	0.00719045	0.176161	0.273785	-0.262814	0.0324917	0.926321	0.978739	0.545972
-1.2361	-1.80275	0.0494986	0.420466	0.301585	1.04337	0.37287	0.851065	ABI1	chr10	26746593	26748745	-	4218	abl interactor 1	GO:0001756somitogenesis//GO:0007169transmembranereceptorproteintyrosinekinasesignalingpathway//GO:0008154actinpolymerizationordepolymerization//GO:0008285negativeregulationofcellpopulationproliferation//GO:0018108peptidyl-tyrosinephosphorylation//GO:0035855megakaryocytedevelopment//GO:0048813dendritemorphogenesis//GO:0061098positiveregulationofproteintyrosinekinaseactivity//GO:0072673lamellipodiu…	GO:0005622intracellularanatomicalstructure//GO:0005634nucleus//GO:0005783endoplasmicreticulum//GO:0005829cytosol//GO:0005856cytoskeleton//GO:0014069postsynapticdensity//GO:0030027lamellipodium//GO:0030426growthcone//GO:0031209SCARcomplex//GO:0032433filopodiumtip//GO:0070062extracellularexosome	GO:0005515proteinbinding//GO:0008092cytoskeletalproteinbinding//GO:0017124SH3domainbinding//GO:0030296proteintyrosinekinaseactivatoractivity//GO:0035591signalingadaptoractivity//GO:0045296cadherinbinding	1.16192	0.216509	5.38776e-05	0.000190478	1.21264	0.278152	2.27794e-06	8.72452e-06	-1.04365	-0.0616432	0.124763	0.17132	6.11625	6.33359	6.39458	6.15091	6.08159	6.30818	6.35357	6.33902	6.42977	6.34774	6.40624
0.629362	0.757506	0.766363	0.718796	0.747459	-1.18852	-1.21951	-1.21145	ABI2	chr2	203328280	203328631	+	23275	abl interactor 2	GO:0007010cytoskeletonorganization//GO:0007399nervoussystemdevelopment//GO:0008154actinpolymerizationordepolymerization//GO:0010592positiveregulationoflamellipodiumassembly//GO:0016477cellmigration//GO:0016601Racproteinsignaltransduction//GO:0018108peptidyl-tyrosinephosphorylation//GO:0061001regulationofdendriticspinemorphogenesis//GO:0070309lensfibercellmorphogenesis//GO:2000601positiveregulatio…	GO:0005634nucleus//GO:0005737cytoplasm//GO:0005829cytosol//GO:0005856cytoskeleton//GO:0005912adherensjunction//GO:0030027lamellipodium//GO:0031209SCARcomplex//GO:0032433filopodiumtip//GO:0043197dendriticspine	GO:0005515proteinbinding//GO:0008093cytoskeletalanchoractivity//GO:0017124SH3domainbinding//GO:0019900kinasebinding//GO:0031267smallGTPasebinding//GO:0031625ubiquitinproteinligasebinding//GO:0035591signalingadaptoractivity//GO:0042802identicalproteinbinding//GO:0070064proline-richregionbinding	1.01829	0.0261418	0.57643	0.662649	-1.94811	-0.962075	6.46443e-15	1.11275e-13	1.98373	0.988217	5.52153e-16	9.97522e-15	5.43241	5.45812	4.47039	5.39997	5.46485	5.46934	5.44525	5.45977	4.47949	4.4638	4.46788
0.629784	0.493525	-1.13407	-0.389847	-1.38926	0.238461	-0.154713	1.70612	ABI3BP	chr3	100749156	100750610	-	10978	ABI family member 3 binding protein		GO:0005576extracellularregion//GO:0005615extracellularspace//GO:0062023collagen-containingextracellularmatrix	GO:0005201extracellularmatrixstructuralconstituent	-1.88638	-0.915623	0.130379	0.19736	1.03029	0.0430536	0.937057	0.953615	-1.94353	-0.958676	0.0941177	0.133048	-2.97652	-3.89429	-2.95558	-2.93573	-3.01732	-3.9919	-3.54627	-4.1447	-3.17005	-3.40547	-2.29123
0.785963	0.557611	0.291356	0.865545	0.989231	-0.84575	-1.16681	-1.47714	ABITRAM	chr9	108934400	108934565	+	2525	actin binding transcription modulator	GO:0030833regulationofactinfilamentpolymerization//GO:0048813dendritemorphogenesis//GO:0051489regulationoffilopodiumassembly	GO:0005634nucleus//GO:0016607nuclearspeck//GO:0030027lamellipodium//GO:0030425dendrite//GO:0030426growthcone//GO:0032433filopodiumtip	GO:0003785actinmonomerbinding//GO:0005515proteinbinding//GO:0051015actinfilamentbinding	1.00248	0.00357572	0.948931	0.962842	-1.25165	-0.323831	1.46693e-05	4.95956e-05	1.25476	0.327407	3.04873e-06	9.19057e-06	4.86597	4.87361	4.54421	4.88599	4.84595	4.79926	4.89994	4.92163	4.59988	4.54358	4.48917
0.351984	0.376023	0.875406	0.798551	1.0916	-1.17751	-0.970215	-1.34583	ABL1	chr9	130713016	130714455	+	7018	ABL proto-oncogene 1, non-receptor tyrosine kinase	GO:0000278mitoticcellcycle//GO:0001843neuraltubeclosure//GO:0001922B-1Bcellhomeostasis//GO:0001934positiveregulationofproteinphosphorylation//GO:0002322Bcellproliferationinvolvedinimmuneresponse//GO:0002333transitionalonestageBcelldifferentiation//GO:0006298mismatchrepair//GO:0006355regulationoftranscription,DNA-templated//GO:0006464cellularproteinmodificationprocess//GO:0006468proteinphosphoryla…	GO:0005634nucleus//GO:0005654nucleoplasm//GO:0005730nucleolus//GO:0005737cytoplasm//GO:0005739mitochondrion//GO:0005829cytosol//GO:0015629actincytoskeleton//GO:0016604nuclearbody//GO:0030425dendrite//GO:0031252cellleadingedge//GO:0031965nuclearmembrane//GO:0032991protein-containingcomplex//GO:0043025neuronalcellbody//GO:0048471perinuclearregionofcytoplasm//GO:0098794postsynapse	GO:0000287magnesiumionbinding//GO:0000400four-wayjunctionDNAbinding//GO:0000405bubbleDNAbinding//GO:0001784phosphotyrosineresiduebinding//GO:0003677DNAbinding//GO:0003713transcriptioncoactivatoractivity//GO:0003785actinmonomerbinding//GO:0004515nicotinate-nucleotideadenylyltransferaseactivity//GO:0004672proteinkinaseactivity//GO:0004713proteintyrosinekinaseactivity//GO:0004714transmembranerecepto…	1.12624	0.17152	0.000381699	0.00111824	-1.38861	-0.473637	2.03157e-10	1.51196e-09	1.56391	0.645156	4.88079e-14	5.81746e-13	7.01631	7.18889	6.54342	7.01259	7.02003	7.17452	7.15075	7.24141	6.5394	6.60353	6.48732
0.153674	0.639479	0.873831	0.647584	1.02635	-1.62606	-1.18656	-0.5283	ABL2	chr1	179099330	179109441	-	16689	ABL proto-oncogene 2, non-receptor tyrosine kinase	GO:0006464cellularproteinmodificationprocess//GO:0007155celladhesion//GO:0007165signaltransduction//GO:0007204positiveregulationofcytosoliccalciumionconcentration//GO:0010506regulationofautophagy//GO:0010863positiveregulationofphospholipaseCactivity//GO:0010976positiveregulationofneuronprojectiondevelopment//GO:0018108peptidyl-tyrosinephosphorylation//GO:0030100regulationofendocytosis//GO:0030155…	GO:0005829cytosol//GO:0015629actincytoskeleton	GO:0000287magnesiumionbinding//GO:0001784phosphotyrosineresiduebinding//GO:0003785actinmonomerbinding//GO:0004672proteinkinaseactivity//GO:0004713proteintyrosinekinaseactivity//GO:0004714transmembranereceptorproteintyrosinekinaseactivity//GO:0004715non-membranespanningproteintyrosinekinaseactivity//GO:0005515proteinbinding//GO:0005524ATPbinding//GO:0030145manganeseionbinding//GO:0051015actinfilam…	1.10493	0.143959	0.045506	0.0805707	-1.39081	-0.47593	1.60764e-06	6.28828e-06	1.53676	0.619889	3.51141e-09	1.67759e-08	5.20294	5.34755	4.72049	5.12534	5.28053	5.3554	5.28312	5.40412	4.5568	4.6972	4.90748
-1.33774	-1.09436	-0.117018	-0.360093	-0.395723	0.885904	1.24237	1.17666	ABLIM1	chr10	114431112	114436373	-	10209	actin binding LIM protein 1	GO:0007010cytoskeletonorganization//GO:0007601visualperception//GO:0009887animalorganmorphogenesis//GO:0030032lamellipodiumassembly//GO:0060271ciliumassembly	GO:0001725stressfiber//GO:0005737cytoplasm//GO:0015629actincytoskeleton//GO:0030027lamellipodium	GO:0003779actinbinding//GO:0005515proteinbinding//GO:0046872metalionbinding//GO:0051015actinfilamentbinding	1.17986	0.238614	2.07232e-06	1.01518e-05	1.51043	0.594955	1.48159e-13	1.98641e-12	-1.28018	-0.356342	2.60601e-10	1.50732e-09	8.04714	8.28438	8.64151	8.01593	8.07835	8.32898	8.26665	8.25751	8.58618	8.6776	8.66074
-1.16315	-1.04886	-0.476387	-0.334663	-0.439849	1.1698	1.23861	1.0545	ABLIM2	chr4	7965310	7967103	-	6166	actin binding LIM protein family member 2	GO:0006351transcription,DNA-templated//GO:0030032lamellipodiumassembly//GO:0030036actincytoskeletonorganization	GO:0005737cytoplasm//GO:0015629actincytoskeleton	GO:0046872metalionbinding//GO:0051015actinfilamentbinding	1.16022	0.214404	0.000823934	0.00224496	1.62934	0.704291	9.8687e-12	9.35572e-11	-1.40434	-0.489887	5.52925e-10	3.02962e-09	4.41363	4.62851	5.11853	4.39581	4.43145	4.60998	4.65418	4.62138	5.12336	5.14482	5.08741
-2.06753	-0.969551	0.429313	0.665148	0.754198	0.284318	0.675904	0.228197	ABLIM3	chr5	149141483	149141654	+	7225	actin binding LIM protein family member 3	GO:0006351transcription,DNA-templated//GO:0030032lamellipodiumassembly//GO:0030036actincytoskeletonorganization//GO:0045944positiveregulationoftranscriptionbyRNApolymeraseII//GO:0060271ciliumassembly//GO:1903955positiveregulationofproteintargetingtomitochondrion	GO:0001725stressfiber//GO:0005737cytoplasm//GO:0015629actincytoskeleton//GO:0030027lamellipodium//GO:0098978glutamatergicsynapse	GO:0005515proteinbinding//GO:0046872metalionbinding//GO:0051015actinfilamentbinding	23.0195	4.52478	0.00024745	0.000754166	16.9539	4.08355	0.000839083	0.0020952	1.35777	0.441236	0.308367	0.37848	-6.62199	-2.06573	-2.53545	-7.79371	-5.45028	-2.46465	-1.96131	-1.77124	-2.77412	-1.93835	-2.8939
-0.0144002	0.0633104	-1.73966	-1.00743	0.178891	0.140008	1.37987	0.999404	ABO	chr9	133233278	133233609	-	7353	ABO, alpha 1-3-N-acetylgalactosaminyltransferase and alpha 1-3-galactosyltransferase	GO:0005975carbohydratemetabolicprocess//GO:0006486proteinglycosylation//GO:0030259lipidglycosylation	GO:0000139Golgimembrane//GO:0005576extracellularregion//GO:0005794Golgiapparatus//GO:0016021integralcomponentofmembrane//GO:0031982vesicle//GO:0032580Golgicisternamembrane	GO:0000166nucleotidebinding//GO:0003823antigenbinding//GO:0004380glycoprotein-fucosylgalactosidealpha-N-acetylgalactosaminyltransferaseactivity//GO:0004381fucosylgalactoside3-alpha-galactosyltransferaseactivity//GO:0016757glycosyltransferaseactivity//GO:0030145manganeseionbinding	-1.0701	-0.0977427	0.0963096	0.153056	1.06183	0.0865505	0.141642	0.207017	-1.13626	-0.184293	0.00157658	0.0031338	5.39942	5.307	5.485	5.39534	5.4035	5.21425	5.29111	5.41563	5.41155	5.54169	5.50176
1.47022	1.52548	-0.277169	-0.316167	0.126646	-1.03742	-0.490951	-1.00064	ABR	chr17	1003519	1006169	-	12532	ABR activator of RhoGEF and GTPase	GO:0007264smallGTPasemediatedsignaltransduction//GO:0050804modulationofchemicalsynaptictransmission//GO:0051056regulationofsmallGTPasemediatedsignaltransduction//GO:0090630activationofGTPaseactivity	GO:0005829cytosol//GO:0016020membrane//GO:0030424axon//GO:0043197dendriticspine//GO:0098685Schaffercollateral-CA1synapse//GO:0098978glutamatergicsynapse	GO:0005085guanyl-nucleotideexchangefactoractivity//GO:0005096GTPaseactivatoractivity//GO:0005515proteinbinding	-1.23424	-0.303622	8.24377e-08	5.59982e-07	-1.34565	-0.4283	2.79078e-10	2.02758e-09	1.09026	0.124678	0.00228628	0.00442246	7.74038	7.43795	7.31222	7.73532	7.74543	7.41571	7.40858	7.48957	7.27666	7.37661	7.28338
0.213407	-0.426813	-0.0768703	-0.686781	-1.7129	1.46963	0.132524	1.0878	ABRACL	chr6	139028745	139028875	+	1137	ABRA C-terminal like	GO:0032970regulationofactinfilament-basedprocess			-1.05369	-0.0754497	0.182471	0.261637	1.07996	0.110983	0.0568406	0.093735	-1.13795	-0.186433	0.00109198	0.00222818	5.74219	5.66248	5.85346	5.77769	5.70669	5.7455	5.67786	5.56407	5.917	5.76872	5.87465
0.965578	0.863202	0.659195	0.748746	0.306652	-1.3348	-1.18417	-1.0244	ABRAXAS1	chr4	83459517	83462902	-	7699	abraxas 1, BRCA1 A complex subunit	GO:0006302double-strandbreakrepair//GO:0006325chromatinorganization//GO:0007095mitoticG2DNAdamagecheckpointsignaling//GO:0008608attachmentofspindlemicrotubulestokinetochore//GO:0010212responsetoionizingradiation//GO:0045739positiveregulationofDNArepair//GO:0070536proteinK63-linkeddeubiquitination//GO:0090307mitoticspindleassembly	GO:0005634nucleus//GO:0005654nucleoplasm//GO:0016604nuclearbody//GO:0070531BRCA1-Acomplex	GO:0005515proteinbinding//GO:0008017microtubulebinding//GO:0031593polyubiquitinmodification-dependentproteinbinding	-1.11432	-0.156161	0.0346755	0.0634337	-1.98165	-0.986703	3.00383e-11	2.61668e-10	1.77835	0.830542	2.19887e-10	1.2887e-09	4.04436	3.88239	3.05443	4.06854	4.02018	3.9238	3.96611	3.75726	2.98184	3.05299	3.12847
-1.56946	-1.35052	0.278052	1.06881	0.993343	0.516309	0.376624	-0.313155	ABRAXAS2	chr10	124801819	124801901	+	2955	abraxas 2, BRISC complex subunit	GO:0000278mitoticcellcycle//GO:0002931responsetoischemia//GO:0007059chromosomesegregation//GO:0008608attachmentofspindlemicrotubulestokinetochore//GO:0051301celldivision//GO:0070536proteinK63-linkeddeubiquitination//GO:0090307mitoticspindleassembly	GO:0005634nucleus//GO:0005737cytoplasm//GO:0005813centrosome//GO:0005829cytosol//GO:0030496midbody//GO:0031616spindlepolecentrosome//GO:0036449microtubuleminus-end//GO:0070552BRISCcomplex	GO:0005515proteinbinding//GO:0008017microtubulebinding//GO:0031593polyubiquitinmodification-dependentproteinbinding	1.1699	0.226384	0.000225276	0.000693205	1.12298	0.167326	0.00444972	0.00959866	1.04179	0.059058	0.214536	0.276223	4.97589	5.20443	5.14456	4.96472	4.98706	5.15321	5.23388	5.22618	5.17752	5.16327	5.09289
1.59056	1.2646	-0.178918	-0.0257608	-0.222454	-0.693964	-0.233143	-1.50093	ABT1	chr6	26596953	26597223	+	2943	activator of basal transcription 1	GO:0000447endonucleolyticcleavageinITS1toseparateSSU-rRNAfrom5.8SrRNAandLSU-rRNAfromtricistronicrRNAtranscript(SSU-rRNA,5.8SrRNA,LSU-rRNA)//GO:0000472endonucleolyticcleavagetogeneratemature5'-endofSSU-rRNAfrom(SSU-rRNA,5.8SrRNA,LSU-rRNA)//GO:0000480endonucleolyticcleavagein5'-ETSoftricistronicrRNAtranscript(SSU-rRNA,5.8SrRNA,LSU-rRNA)//GO:0006366transcriptionbyRNApolymeraseII//GO:0034462small-sub…	GO:0005634nucleus//GO:0005730nucleolus	GO:0003677DNAbinding//GO:0003713transcriptioncoactivatoractivity//GO:0003723RNAbinding//GO:0005515proteinbinding	-1.10193	-0.140029	0.00856059	0.0184232	-1.14943	-0.200921	0.000567084	0.00145865	1.04311	0.0608922	0.193234	0.251873	5.38204	5.24202	5.18253	5.39658	5.36751	5.23876	5.25242	5.23487	5.19282	5.23392	5.12085
-1.2972	-1.16674	-0.31241	-0.321202	-0.209183	1.06669	1.29996	0.940083	ABTB1	chr3	127672935	127673081	+	6155	ankyrin repeat and BTB domain containing 1	GO:0006414translationalelongation	GO:0000151ubiquitinligasecomplex//GO:0005730nucleolus//GO:0005737cytoplasm//GO:0005829cytosol//GO:0005886plasmamembrane	GO:0003746translationelongationfactoractivity//GO:0005515proteinbinding	1.33767	0.419723	3.19656e-07	1.87199e-06	2.04472	1.0319	1.12028e-14	1.82193e-13	-1.52857	-0.612181	1.14927e-11	8.5002e-11	4.57695	4.99779	5.60986	4.54809	4.60582	4.98386	4.97997	5.02954	5.59413	5.69735	5.5381
-1.59016	-1.46897	0.338249	-0.019393	0.202553	0.840498	0.922649	0.774578	ABTB2	chr11	34150987	34152584	-	4976	ankyrin repeat and BTB domain containing 2	GO:0097237cellularresponsetotoxicsubstance		GO:0003674molecular_function//GO:0046982proteinheterodimerizationactivity	1.85929	0.89475	9.44045e-11	1.38982e-09	2.36481	1.24172	1.39715e-13	1.87867e-12	-1.27189	-0.346972	6.23008e-06	1.79161e-05	3.18123	4.07214	4.42367	3.14954	3.21292	4.15815	3.97109	4.08717	4.42084	4.4638	4.38636
-1.17619	-1.1054	-0.255552	-0.414841	-0.436498	1.23793	1.3221	0.82845	ACAA1	chr3	38103129	38103793	-	7106	acetyl-CoA acyltransferase 1	GO:0000038verylong-chainfattyacidmetabolicprocess//GO:0006635fattyacidbeta-oxidation//GO:0008206bileacidmetabolicprocess//GO:0010124phenylacetatecatabolicprocess//GO:0033540fattyacidbeta-oxidationusingacyl-CoAoxidase//GO:0036109alpha-linolenicacidmetabolicprocess	GO:0005576extracellularregion//GO:0005777peroxisome//GO:0005782peroxisomalmatrix//GO:0005829cytosol//GO:0016020membrane//GO:0035580specificgranulelumen	GO:0003985acetyl-CoAC-acetyltransferaseactivity//GO:0003988acetyl-CoAC-acyltransferaseactivity//GO:0005515proteinbinding//GO:0008775acetateCoA-transferaseactivity//GO:0016401palmitoyl-CoAoxidaseactivity//GO:0050633acetyl-CoAC-myristoyltransferaseactivity	1.18729	0.247676	4.63863e-05	0.000166322	1.65068	0.723057	5.78317e-13	6.96162e-12	-1.39028	-0.475381	1.37133e-10	8.32141e-10	5.9114	6.15773	6.63596	5.9001	5.9227	6.19392	6.14309	6.13617	6.67057	6.69743	6.53988
-1.09001	-1.32769	-0.42943	-0.215105	-0.214055	1.44605	0.857351	0.972892	ACAA2	chr18	49782164	49783931	-	4920	acetyl-CoA acyltransferase 2	GO:0006635fattyacidbeta-oxidation//GO:0006695cholesterolbiosyntheticprocess//GO:0071456cellularresponsetohypoxia//GO:1901029negativeregulationofmitochondrialoutermembranepermeabilizationinvolvedinapoptoticsignalingpathway//GO:1902109negativeregulationofmitochondrialmembranepermeabilityinvolvedinapoptoticprocess	GO:0005739mitochondrion//GO:0005759mitochondrialmatrix	GO:0003723RNAbinding//GO:0003985acetyl-CoAC-acetyltransferaseactivity//GO:0003986acetyl-CoAhydrolaseactivity//GO:0003988acetyl-CoAC-acyltransferaseactivity//GO:0005515proteinbinding//GO:0016290palmitoyl-CoAhydrolaseactivity//GO:0047617acyl-CoAhydrolaseactivity//GO:0102991myristoyl-CoAhydrolaseactivity	1.21646	0.282689	5.56576e-05	0.000196137	1.63399	0.708399	1.64042e-11	1.49354e-10	-1.34323	-0.42571	1.241e-08	5.43204e-08	5.05665	5.34137	5.7667	5.09332	5.01997	5.29717	5.36331	5.36363	5.87593	5.69426	5.72992
-1.04246	-0.148335	-0.631005	-1.04322	1.22562	1.36696	-0.569817	0.842256	ACAA2P1	chrX	48775644	48776143	-	1327	NA				1.18246	0.241797	0.72151	0.787064	1.6551	0.726919	0.283868	0.373463	-1.3997	-0.485122	0.393673	0.466657	-3.80877	-3.52504	-3.08213	-4.09327	-3.52428	-3.83143	-4.09376	-2.64994	-2.55999	-3.7925	-2.8939
-0.340691	0.020435	1.21419	1.10402	1.01372	-1.28431	-0.760313	-0.96706	ACACA	chr17	37084992	37087439	-	13022	acetyl-CoA carboxylase alpha	GO:0001894tissuehomeostasis//GO:0006084acetyl-CoAmetabolicprocess//GO:0006633fattyacidbiosyntheticprocess//GO:0019538proteinmetabolicprocess//GO:0046949fatty-acyl-CoAbiosyntheticprocess//GO:0051289proteinhomotetramerization//GO:0055088lipidhomeostasis//GO:0071380cellularresponsetoprostaglandinEstimulus//GO:2001295malonyl-CoAbiosyntheticprocess	GO:0001650fibrillarcenter//GO:0005829cytosol//GO:0015629actincytoskeleton	GO:0003989acetyl-CoAcarboxylaseactivity//GO:0005515proteinbinding//GO:0005524ATPbinding//GO:0042802identicalproteinbinding//GO:0046872metalionbinding	1.27534	0.350876	1.85122e-08	1.48278e-07	-1.17411	-0.231568	1.86045e-05	6.15152e-05	1.49738	0.582445	2.52934e-13	2.59713e-12	7.70169	8.05148	7.46943	7.65198	7.75139	8.07998	8.04965	8.0248	7.39225	7.53648	7.47957
0.448772	0.545785	0.848346	0.84197	0.870242	-1.43113	-0.987801	-1.13619	ACACB	chr12	109116587	109116704	+	14513	acetyl-CoA carboxylase beta	GO:0006084acetyl-CoAmetabolicprocess//GO:0006633fattyacidbiosyntheticprocess//GO:0009410responsetoxenobioticstimulus//GO:0010629negativeregulationofgeneexpression//GO:0010884positiveregulationoflipidstorage//GO:0010906regulationofglucosemetabolicprocess//GO:0014070responsetoorganiccycliccompound//GO:0031667responsetonutrientlevels//GO:0031999negativeregulationoffattyacidbeta-oxidation//GO:0043086…	GO:0005634nucleus//GO:0005739mitochondrion//GO:0005741mitochondrialoutermembrane//GO:0005829cytosol	GO:0003989acetyl-CoAcarboxylaseactivity//GO:0005515proteinbinding//GO:0005524ATPbinding//GO:0009374biotinbinding//GO:0042802identicalproteinbinding//GO:0046872metalionbinding	1.26983	0.344638	7.27964e-05	0.000250129	-3.08314	-1.6244	6.89171e-14	9.80628e-13	3.91507	1.96904	2.30399e-16	4.53303e-15	3.83589	4.18097	2.20627	3.7889	3.88288	4.17596	4.16978	4.19717	1.96789	2.39733	2.25359
0.999935	1.18774	-1.05524	-0.954613	-1.35962	0.00912194	0.705372	0.467309	ACAD10	chr12	111686053	111686239	+	8934	acyl-CoA dehydrogenase family member 10	GO:0006635fattyacidbeta-oxidation	GO:0005739mitochondrion//GO:0005759mitochondrialmatrix	GO:0003995acyl-CoAdehydrogenaseactivity//GO:0050660flavinadeninedinucleotidebinding	-1.1789	-0.237445	0.00014755	0.000473362	-1.05307	-0.0746006	0.169884	0.241939	-1.11949	-0.162845	0.00272393	0.00520462	4.91271	4.67426	4.83743	4.90261	4.9228	4.68157	4.69239	4.64883	4.79604	4.87092	4.84532
-0.385598	0.0135879	1.21794	1.2247	0.409752	-1.809	-0.0178032	-0.653573	ACAD11	chr3	132558138	132559085	-	5033	acyl-CoA dehydrogenase family member 11	GO:0006635fattyacidbeta-oxidation//GO:0033539fattyacidbeta-oxidationusingacyl-CoAdehydrogenase	GO:0005634nucleus//GO:0005739mitochondrion//GO:0005743mitochondrialinnermembrane//GO:0005777peroxisome//GO:0031966mitochondrialmembrane	GO:0003995acyl-CoAdehydrogenaseactivity//GO:0004466long-chain-acyl-CoAdehydrogenaseactivity//GO:0005515proteinbinding//GO:0017099very-long-chain-acyl-CoAdehydrogenaseactivity//GO:0050660flavinadeninedinucleotidebinding//GO:0070991medium-chain-acyl-CoAdehydrogenaseactivity	1.39507	0.480335	0.00906177	0.0193837	-1.19228	-0.253719	0.19626	0.273652	1.66331	0.734054	0.00017525	0.000404871	1.08566	1.55105	0.823333	1.00395	1.16737	1.66042	1.66319	1.32956	0.421229	1.15452	0.894247
0.080517	1.07023	-1.08421	-0.96357	-1.32944	0.342731	0.735664	1.14807	ACAD8	chr11	134253548	134253709	+	7121	acyl-CoA dehydrogenase family member 8	GO:0006574valinecatabolicprocess//GO:0006629lipidmetabolicprocess//GO:0009083branched-chainaminoacidcatabolicprocess	GO:0005759mitochondrialmatrix	GO:0003995acyl-CoAdehydrogenaseactivity//GO:0050660flavinadeninedinucleotidebinding	-1.10031	-0.137909	0.00895635	0.019185	1.0102	0.0146388	0.766309	0.825549	-1.11153	-0.152548	0.00220751	0.00427728	5.40409	5.26557	5.41767	5.3638	5.44439	5.26895	5.27877	5.24898	5.38515	5.41714	5.45073
1.64719	1.49803	-0.569898	-1.01103	-0.588268	-0.440512	-0.189555	-0.345953	ACAD9	chr3	128879596	128879841	+	11841	acyl-CoA dehydrogenase family member 9	GO:0001676long-chainfattyacidmetabolicprocess//GO:0032981mitochondrialrespiratorychaincomplexIassembly//GO:0051791medium-chainfattyacidmetabolicprocess	GO:0005634nucleus//GO:0005739mitochondrion//GO:0005743mitochondrialinnermembrane//GO:0030425dendrite//GO:0031966mitochondrialmembrane	GO:0000062fatty-acyl-CoAbinding//GO:0003995acyl-CoAdehydrogenaseactivity//GO:0004466long-chain-acyl-CoAdehydrogenaseactivity//GO:0005515proteinbinding//GO:0017099very-long-chain-acyl-CoAdehydrogenaseactivity//GO:0050660flavinadeninedinucleotidebinding//GO:0070991medium-chain-acyl-CoAdehydrogenaseactivity	-1.48674	-0.572157	4.34666e-11	7.06408e-10	-1.3883	-0.473321	2.02727e-09	1.28091e-08	-1.07091	-0.0988363	0.0423516	0.0650039	5.83593	5.2633	5.36251	5.85454	5.81733	5.3015	5.19147	5.29692	5.33378	5.39638	5.35737
-1.37869	-0.781581	-0.150604	-0.631648	0.588975	-0.322526	1.20557	1.4705	ACAD9-DT	chr3	128871913	128872405	-	3591	NA				1.27634	0.352015	0.0566243	0.0971862	1.59944	0.677563	0.000832592	0.0020808	-1.25314	-0.325548	0.0350433	0.0546964	1.34317	1.70451	2.00653	1.23696	1.44938	1.67385	1.50272	1.93696	1.61269	2.15632	2.25057
1.38903	0.941107	-1.14393	-0.925815	-1.27858	0.361736	0.190207	0.466247	ACADM	chr1	75724431	75724817	+	13774	acyl-CoA dehydrogenase medium chain	GO:0001889liverdevelopment//GO:0005978glycogenbiosyntheticprocess//GO:0006111regulationofgluconeogenesis//GO:0006635fattyacidbeta-oxidation//GO:0009409responsetocold//GO:0009791post-embryonicdevelopment//GO:0019254carnitinemetabolicprocess,CoA-linked//GO:0033539fattyacidbeta-oxidationusingacyl-CoAdehydrogenase//GO:0042594responsetostarvation//GO:0045329carnitinebiosyntheticprocess//GO:0051791medi…	GO:0005634nucleus//GO:0005739mitochondrion//GO:0005759mitochondrialmatrix//GO:0030424axon//GO:0031966mitochondrialmembrane	GO:0003995acyl-CoAdehydrogenaseactivity//GO:0042802identicalproteinbinding//GO:0050660flavinadeninedinucleotidebinding//GO:0070991medium-chain-acyl-CoAdehydrogenaseactivity	-1.66717	-0.737399	9.27841e-13	2.58179e-11	-1.20306	-0.266706	2.45102e-05	7.94196e-05	-1.38577	-0.470693	1.45458e-09	7.405e-09	6.19327	5.45528	5.92615	6.26572	6.12081	5.44628	5.51684	5.40272	5.93338	5.87789	5.96719
1.08041	0.997892	-0.892192	-1.15729	-1.41428	0.663973	0.372826	0.348657	ACADS	chr12	120725774	120725931	+	2609	acyl-CoA dehydrogenase short chain	GO:0006635fattyacidbeta-oxidation//GO:0033539fattyacidbeta-oxidationusingacyl-CoAdehydrogenase//GO:0046359butyratecatabolicprocess	GO:0005634nucleus//GO:0005654nucleoplasm//GO:0005739mitochondrion//GO:0005759mitochondrialmatrix//GO:0005813centrosome	GO:0003995acyl-CoAdehydrogenaseactivity//GO:0004085butyryl-CoAdehydrogenaseactivity//GO:0050660flavinadeninedinucleotidebinding	-1.97856	-0.984452	2.81987e-13	9.29708e-12	-1.20053	-0.263671	0.000273916	0.000744834	-1.64807	-0.720781	5.24235e-11	3.441e-10	5.11742	4.12403	4.85599	5.1361	5.09874	4.24285	4.1228	4.00643	4.94753	4.81569	4.80474
0.288658	0.386954	-1.18121	-1.10212	-1.21782	0.850612	0.976456	0.998466	ACADSB	chr10	123008979	123009067	+	6234	acyl-CoA dehydrogenase short/branched chain	GO:0006550isoleucinecatabolicprocess//GO:0006631fattyacidmetabolicprocess	GO:0005739mitochondrion//GO:0005759mitochondrialmatrix	GO:00038532-methylacyl-CoAdehydrogenaseactivity//GO:0003995acyl-CoAdehydrogenaseactivity//GO:0016937short-branched-chain-acyl-CoAdehydrogenaseactivity//GO:0042802identicalproteinbinding//GO:0050660flavinadeninedinucleotidebinding//GO:0102035isobutyryl-CoA:FADoxidoreductaseactivity	-1.44601	-0.532078	1.16711e-10	1.67e-09	1.16018	0.214348	0.00010495	0.000305905	-1.67763	-0.746426	1.94885e-14	2.52592e-13	5.59613	5.06376	5.80983	5.57875	5.61352	5.05875	5.08673	5.0458	5.77755	5.82207	5.82986
-1.33944	-1.37146	-0.130979	-0.186795	-0.0808203	0.987591	1.20212	0.91978	ACADVL	chr17	7217125	7217173	+	4820	acyl-CoA dehydrogenase very long chain	GO:0001659temperaturehomeostasis//GO:0009409responsetocold//GO:0015980energyderivationbyoxidationoforganiccompounds//GO:0030855epithelialcelldifferentiation//GO:0033539fattyacidbeta-oxidationusingacyl-CoAdehydrogenase//GO:0045717negativeregulationoffattyacidbiosyntheticprocess//GO:0046322negativeregulationoffattyacidoxidation//GO:0090181regulationofcholesterolmetabolicprocess	GO:0005654nucleoplasm//GO:0005730nucleolus//GO:0005739mitochondrion//GO:0005759mitochondrialmatrix//GO:0031314extrinsiccomponentofmitochondrialinnermembrane//GO:0031966mitochondrialmembrane//GO:0042645mitochondrialnucleoid	GO:0000062fatty-acyl-CoAbinding//GO:0003995acyl-CoAdehydrogenaseactivity//GO:0004466long-chain-acyl-CoAdehydrogenaseactivity//GO:0005515proteinbinding//GO:0017099very-long-chain-acyl-CoAdehydrogenaseactivity//GO:0042802identicalproteinbinding//GO:0050660flavinadeninedinucleotidebinding	1.2395	0.309764	2.5871e-09	2.57366e-08	1.52215	0.606108	5.11307e-15	8.96933e-14	-1.22803	-0.296344	5.03585e-10	2.77694e-09	8.52354	8.83348	9.12993	8.5276	8.51949	8.83396	8.81981	8.84668	9.11753	9.17191	9.10034
-1.16808	0.616208	0.491034	0.205647	-1.74083	-0.141814	1.3227	0.415136	ACAP1	chr17	7336529	7336787	+	7420	ArfGAP with coiled-coil, ankyrin repeat and PH domains 1	GO:0015031proteintransport//GO:0050790regulationofcatalyticactivity	GO:0016020membrane//GO:0055038recyclingendosomemembrane	GO:0005096GTPaseactivatoractivity//GO:0005515proteinbinding//GO:0046872metalionbinding	1.00987	0.0141709	0.96426	0.973752	1.2314	0.300304	0.346843	0.440479	-1.21937	-0.286133	0.314295	0.384667	-0.959285	-0.985686	-0.663482	-1.28591	-0.632654	-0.678483	-0.782968	-1.49561	-0.91018	-0.373995	-0.706271
-0.409363	-0.949011	1.00662	1.06645	0.710739	-1.62062	-0.463927	0.659116	ACAP2	chr3	195274745	195279428	-	11066	ArfGAP with coiled-coil, ankyrin repeat and PH domains 2	GO:0030029actinfilament-basedprocess//GO:0032456endocyticrecycling//GO:0050790regulationofcatalyticactivity//GO:1990090cellularresponsetonervegrowthfactorstimulus	GO:0001726ruffle//GO:0010008endosomemembrane//GO:0016020membrane	GO:0005096GTPaseactivatoractivity//GO:0046872metalionbinding	1.12703	0.172532	0.00316042	0.00752372	1.0171	0.0244678	0.651268	0.727146	1.10808	0.148064	0.0048429	0.00888897	6.21332	6.38535	6.23517	6.24221	6.18444	6.39377	6.40018	6.3621	6.11255	6.23637	6.35658
1.05471	-0.574536	0.527655	-1.02038	0.0509304	-1.2092	1.60711	-0.436278	ACAP2-IT1	chr3	195280723	195280809	-	690	ACAP2 intronic transcript 1				-1.09779	-0.134607	0.689841	0.761446	-1.0689	-0.0961262	0.783293	0.838422	-1.02703	-0.0384811	0.904316	0.92328	-1.08982	-1.23597	-1.18523	-0.782482	-1.39717	-0.98133	-1.56538	-1.16119	-1.63661	-0.574073	-1.345
-0.0890825	-0.0652239	-0.960176	-1.17188	-0.98367	0.927914	1.41719	0.924929	ACAP3	chr1	1292390	1293708	-	8707	ArfGAP with coiled-coil, ankyrin repeat and PH domains 3	GO:0001764neuronmigration//GO:0010975regulationofneuronprojectiondevelopment//GO:0050790regulationofcatalyticactivity	GO:0030426growthcone	GO:0005096GTPaseactivatoractivity//GO:0046872metalionbinding	-1.21208	-0.277482	1.87399e-06	9.27308e-06	1.26306	0.33692	7.26087e-08	3.55086e-07	-1.53092	-0.614402	1.50844e-13	1.63278e-12	7.31838	7.04061	7.6556	7.31494	7.32183	7.06326	7.0021	7.05648	7.60877	7.75013	7.6079
0.548974	0.440382	-1.22584	-1.07167	-1.27287	0.944758	0.850384	0.785882	ACAT1	chr11	108116695	108116902	+	5869	acetyl-CoA acetyltransferase 1	GO:0001889liverdevelopment//GO:0006085acetyl-CoAbiosyntheticprocess//GO:0006550isoleucinecatabolicprocess//GO:0006635fattyacidbeta-oxidation//GO:0007420braindevelopment//GO:0009725responsetohormone//GO:0014070responsetoorganiccycliccompound//GO:0015936coenzymeAmetabolicprocess//GO:0015937coenzymeAbiosyntheticprocess//GO:0034435cholesterolesterification//GO:0042594responsetostarvation//GO:0046356a…	GO:0005739mitochondrion//GO:0005759mitochondrialmatrix//GO:0070062extracellularexosome	GO:0003985acetyl-CoAC-acetyltransferaseactivity//GO:0016453C-acetyltransferaseactivity//GO:0019899enzymebinding//GO:0030955potassiumionbinding//GO:0042802identicalproteinbinding//GO:0120225coenzymeAbinding	-1.97011	-0.978276	2.59221e-16	2.69543e-14	1.15784	0.211438	6.43453e-05	0.000194381	-2.28108	-1.18971	5.18645e-19	1.93796e-17	6.82103	5.84253	7.0334	6.85257	6.7895	5.82179	5.91133	5.79448	7.08243	7.02762	6.99016
0.795864	0.684661	0.646361	0.774395	0.708264	-1.04873	-1.2826	-1.27822	ACAT2	chr6	159762045	159762142	+	2639	acetyl-CoA acetyltransferase 2	GO:0006629lipidmetabolicprocess//GO:0006635fattyacidbeta-oxidation	GO:0005737cytoplasm//GO:0005739mitochondrion//GO:0005829cytosol//GO:0070062extracellularexosome	GO:0003985acetyl-CoAC-acetyltransferaseactivity//GO:0005515proteinbinding	-1.00855	-0.0122871	0.758743	0.817359	-1.67452	-0.743748	1.55563e-14	2.47737e-13	1.66032	0.731461	2.75508e-15	4.28071e-14	6.98275	6.97106	6.23992	7.004	6.9615	6.94686	6.9958	6.97052	6.29895	6.20956	6.21123
-0.139829	-0.732647	-0.637075	-0.721787	-1.22757	1.08173	1.2731	1.10408	ACBD3	chr1	226144679	226146821	-	3589	acyl-CoA binding domain containing 3	GO:0006694steroidbiosyntheticprocess	GO:0000139Golgimembrane//GO:0005739mitochondrion//GO:0005794Golgiapparatus//GO:0016020membrane	GO:0000062fatty-acyl-CoAbinding//GO:0005515proteinbinding//GO:0034237proteinkinaseAregulatorysubunitbinding	-1.03471	-0.0492323	0.24813	0.335631	1.13942	0.188297	0.000168754	0.000476233	-1.17897	-0.237529	2.08048e-06	6.43206e-06	6.48112	6.43063	6.66954	6.51626	6.44598	6.45731	6.44727	6.3873	6.66109	6.68378	6.66374
0.731299	0.611295	-1.20263	-0.562489	-1.29969	-0.395104	1.40648	0.71085	ACBD3-AS1	chr1	226148003	226148068	+	535	ACBD3 antisense RNA 1				-1.68766	-0.755026	0.0535071	0.0925272	-1.02447	-0.0348711	0.921251	0.941533	-1.64736	-0.720155	0.0530814	0.0797105	-1.51666	-2.2708	-1.55997	-1.48993	-1.54339	-2.35144	-2.06627	-2.39468	-1.99171	-1.18916	-1.49904
-0.210678	-0.370917	-0.79843	-1.13377	-0.945851	1.20968	1.17965	1.07031	ACBD4	chr17	45132600	45132663	+	3776	acyl-CoA binding domain containing 4			GO:0000062fatty-acyl-CoAbinding//GO:0008289lipidbinding	-1.26089	-0.334437	3.48224e-05	0.000128735	1.65701	0.728579	3.65021e-11	3.11481e-10	-2.0893	-1.06302	3.51022e-15	5.34913e-14	4.31712	3.97916	5.04709	4.35762	4.27662	4.06051	3.89099	3.98599	5.07563	5.06045	5.00518
0.715224	0.0993752	-1.01675	-0.996185	-1.42712	0.619244	1.10273	0.903475	ACBD5	chr10	27168135	27170270	-	11794	acyl-CoA binding domain containing 5	GO:0030242autophagyofperoxisome	GO:0005654nucleoplasm//GO:0005777peroxisome//GO:0005778peroxisomalmembrane//GO:0005829cytosol//GO:0016020membrane//GO:0016021integralcomponentofmembrane	GO:0000062fatty-acyl-CoAbinding//GO:0003674molecular_function//GO:0008289lipidbinding	-1.173	-0.230209	2.02853e-05	7.909e-05	1.04957	0.0697934	0.116167	0.174456	-1.23115	-0.300002	9.95737e-08	3.77903e-07	6.66399	6.43275	6.7336	6.70981	6.61816	6.45208	6.45514	6.39102	6.69552	6.76747	6.73782
0.554879	0.463889	1.06113	0.453898	0.968944	-0.896198	-1.35728	-1.24926	ACBD6	chr1	180269653	180271971	-	7512	acyl-CoA binding domain containing 6		GO:0005829cytosol	GO:0000062fatty-acyl-CoAbinding//GO:0005515proteinbinding//GO:0008289lipidbinding	1.0539	0.0757326	0.128543	0.19503	-1.31511	-0.39518	8.06588e-08	3.9162e-07	1.38599	0.470913	5.58155e-10	3.05536e-09	6.1279	6.20281	5.7336	6.1386	6.1172	6.25763	6.11485	6.23596	5.79741	5.68899	5.71439
0.76598	0.801646	0.647902	0.653284	0.743328	-1.22086	-1.30037	-1.09091	ACBD7	chr10	15075475	15078603	-	3546	acyl-CoA binding domain containing 7			GO:0000062fatty-acyl-CoAbinding//GO:0005515proteinbinding//GO:0008289lipidbinding	-1.14819	-0.199367	0.0145544	0.0294886	-13.2528	-3.72823	8.96775e-17	2.3181e-15	11.5423	3.52886	1.98137e-16	3.94216e-15	3.6624	3.47012	-0.0735018	3.62888	3.69591	3.40697	3.41708	3.58631	-0.105091	-0.254531	0.139118
-0.916093	-0.78626	1.32115	1.49191	0.429382	-0.163366	-1.14256	-0.234158	ACCS	chr11	44065925	44066012	+	5841	1-aminocyclopropane-1-carboxylate synthase homolog (inactive)	GO:0006520cellularaminoacidmetabolicprocess//GO:0009058biosyntheticprocess		GO:0005515proteinbinding//GO:0008483transaminaseactivity//GO:0030170pyridoxalphosphatebinding//GO:0042802identicalproteinbinding	1.29719	0.375394	0.000268726	0.000812008	1.04625	0.065232	0.48938	0.580826	1.23985	0.310162	0.00073742	0.00154616	3.00249	3.37113	3.06695	2.99011	3.01488	3.41699	3.44957	3.24684	3.13373	2.94689	3.12023
0.996091	1.04805	0.418625	0.430146	0.622299	-1.03262	-1.15778	-1.3248	ACD	chr16	67657512	67657684	-	3218	ACD shelterin complex subunit and telomerase recruitment factor	GO:0000723telomeremaintenance//GO:0001501skeletalsystemdevelopment//GO:0001655urogenitalsystemdevelopment//GO:0006886intracellularproteintransport//GO:0007004telomeremaintenanceviatelomerase//GO:0016233telomerecapping//GO:0030326embryoniclimbmorphogenesis//GO:0031848protectionfromnon-homologousendjoiningattelomere//GO:0032202telomereassembly//GO:0032211negativeregulationoftelomeremaintenanceviate…	GO:0000781chromosome,telomericregion//GO:0000783nucleartelomerecapcomplex//GO:0005654nucleoplasm//GO:0005697telomeraseholoenzymecomplex//GO:0016604nuclearbody//GO:0070187shelterincomplex	GO:0005515proteinbinding//GO:0042162telomericDNAbinding//GO:0044877protein-containingcomplexbinding//GO:0070182DNApolymerasebinding	-1.27122	-0.346209	1.08701e-05	4.49432e-05	-2.66494	-1.4141	3.80826e-15	6.84237e-14	2.09637	1.06789	4.50925e-13	4.393e-12	4.53275	4.19104	3.12289	4.51605	4.54944	4.14494	4.15235	4.27583	3.21229	3.13186	3.02452
-0.0833595	0.115601	0.993459	0.99272	1.19524	-0.785732	-1.13081	-1.29712	ACE	chr17	63477061	63477343	+	8365	angiotensin I converting enzyme	GO:0001822kidneydevelopment//GO:0001974bloodvesselremodeling//GO:0002003angiotensinmaturation//GO:0002019regulationofrenaloutputbyangiotensin//GO:0002446neutrophilmediatedimmunity//GO:0002474antigenprocessingandpresentationofpeptideantigenviaMHCclassI//GO:0003081regulationofsystemicarterialbloodpressurebyrenin-angiotensin//GO:0003084positiveregulationofsystemicarterialbloodpressure//GO:0006508pro…	GO:0005576extracellularregion//GO:0005615extracellularspace//GO:0005764lysosome//GO:0005768endosome//GO:0005886plasmamembrane//GO:0009897externalsideofplasmamembrane//GO:0016021integralcomponentofmembrane//GO:0070062extracellularexosome	GO:0004175endopeptidaseactivity//GO:0004180carboxypeptidaseactivity//GO:0008237metallopeptidaseactivity//GO:0008238exopeptidaseactivity//GO:0008240tripeptidyl-peptidaseactivity//GO:0008241peptidyl-dipeptidaseactivity//GO:0008270zincionbinding//GO:0031404chlorideionbinding//GO:0031434mitogen-activatedproteinkinasekinasebinding//GO:0031711bradykininreceptorbinding//GO:0051019mitogen-activatedprotei…	1.63488	0.709184	6.09954e-05	0.000212988	-1.68371	-0.75164	0.000386372	0.00102255	2.75265	1.46082	3.30607e-09	1.58642e-08	0.95737	1.67214	0.213183	0.889285	1.02546	1.62627	1.62576	1.76437	0.408574	0.1724	0.0585741
-1.75768	0.495176	-0.867051	0.10007	-0.659195	0.935315	1.04562	0.707739	ACE2	chrX	15494566	15494849	-	9739	angiotensin converting enzyme 2	GO:0001817regulationofcytokineproduction//GO:0002003angiotensinmaturation//GO:0003051angiotensin-mediateddrinkingbehavior//GO:0003081regulationofsystemicarterialbloodpressurebyrenin-angiotensin//GO:0015827tryptophantransport//GO:0019229regulationofvasoconstriction//GO:0022898regulationoftransmembranetransporteractivity//GO:0042127regulationofcellpopulationproliferation//GO:0046718viralentryintoho…	GO:0005576extracellularregion//GO:0005615extracellularspace//GO:0005788endoplasmicreticulumlumen//GO:0005886plasmamembrane//GO:0005929cilium//GO:0009986cellsurface//GO:0016021integralcomponentofmembrane//GO:0016324apicalplasmamembrane//GO:0030666endocyticvesiclemembrane//GO:0031526brushbordermembrane//GO:0045121membraneraft//GO:0070062extracellularexosome	GO:0001618virusreceptoractivity//GO:0004175endopeptidaseactivity//GO:0004180carboxypeptidaseactivity//GO:0004181metallocarboxypeptidaseactivity//GO:0005515proteinbinding//GO:0008237metallopeptidaseactivity//GO:0008241peptidyl-dipeptidaseactivity//GO:0008270zincionbinding//GO:0042802identicalproteinbinding	1.26436	0.338406	0.773716	0.829407	11.2251	3.48866	0.00186321	0.0043429	-8.8781	-3.15025	0.000455937	0.000990305	-5.21832	-4.86197	-1.72599	-7.79371	-2.64292	-5.75743	-3.54627	-5.2822	-1.63661	-1.38441	-2.15693
-0.897622	-0.768019	-0.567272	-0.688172	-0.681797	1.09445	1.26568	1.24276	ACER2	chr9	19409009	19409192	+	2773	alkaline ceramidase 2	GO:0001953negativeregulationofcell-matrixadhesion//GO:0006919activationofcysteine-typeendopeptidaseactivityinvolvedinapoptoticprocess//GO:0006974cellularresponsetoDNAdamagestimulus//GO:0008284positiveregulationofcellpopulationproliferation//GO:0010506regulationofautophagy//GO:0010942positiveregulationofcelldeath//GO:0030148sphingolipidbiosyntheticprocess//GO:0030330DNAdamageresponse,signaltransdu…	GO:0000139Golgimembrane//GO:0005794Golgiapparatus//GO:0030173integralcomponentofGolgimembrane	GO:0017040N-acylsphingosineamidohydrolaseactivity//GO:0046872metalionbinding//GO:0071633dihydroceramidaseactivity//GO:0102121ceramidaseactivity	1.1443	0.194466	0.0236666	0.0453669	4.15871	2.05614	8.04904e-19	3.35693e-17	-3.63428	-1.86167	1.15042e-19	5.1634e-18	3.62434	3.81328	5.67846	3.55889	3.68979	3.89254	3.77043	3.77687	5.57089	5.74383	5.72068
-0.682584	-0.959471	1.02349	1.18502	1.29784	-1.00981	-0.21214	-0.642334	ACER3	chr11	76860859	76861079	+	23102	alkaline ceramidase 3	GO:0006954inflammatoryresponse//GO:0008284positiveregulationofcellpopulationproliferation//GO:0030148sphingolipidbiosyntheticprocess//GO:0042552myelination//GO:0043067regulationofprogrammedcelldeath//GO:0046512sphingosinebiosyntheticprocess//GO:0046514ceramidecatabolicprocess//GO:0071602phytosphingosinebiosyntheticprocess	GO:0005789endoplasmicreticulummembrane//GO:0016021integralcomponentofmembrane//GO:0030173integralcomponentofGolgimembrane//GO:0030176integralcomponentofendoplasmicreticulummembrane	GO:0005509calciumionbinding//GO:0008270zincionbinding//GO:0017040N-acylsphingosineamidohydrolaseactivity//GO:0070774phytoceramidaseactivity//GO:0071633dihydroceramidaseactivity//GO:0102121ceramidaseactivity	1.25241	0.324706	1.0377e-06	5.43198e-06	1.02323	0.0331246	0.519614	0.609469	1.22398	0.291582	1.24258e-06	3.984e-06	5.35589	5.68179	5.38858	5.37856	5.33321	5.65799	5.68445	5.70293	5.32497	5.45561	5.38515
-1.2421	-0.812793	-0.87824	-0.481129	0.0419364	1.09744	1.13106	1.14382	ACHE	chr7	100889994	100890335	-	4074	acetylcholinesterase (Cartwright blood group)	GO:0001507acetylcholinecatabolicprocessinsynapticcleft//GO:0001919regulationofreceptorrecycling//GO:0002076osteoblastdevelopment//GO:0006581acetylcholinecatabolicprocess//GO:0006656phosphatidylcholinebiosyntheticprocess//GO:0007155celladhesion//GO:0007399nervoussystemdevelopment//GO:0007416synapseassembly//GO:0031623receptorinternalization//GO:0032223negativeregulationofsynaptictransmission,choli…	GO:0005576extracellularregion//GO:0005604basementmembrane//GO:0005615extracellularspace//GO:0005634nucleus//GO:0005794Golgiapparatus//GO:0005886plasmamembrane//GO:0009986cellsurface//GO:0016020membrane//GO:0031225anchoredcomponentofmembrane//GO:0031594neuromuscularjunction//GO:0043083synapticcleft//GO:0045202synapse//GO:0048471perinuclearregionofcytoplasm	GO:0001540amyloid-betabinding//GO:0003990acetylcholinesteraseactivity//GO:0004104cholinesteraseactivity//GO:0005515proteinbinding//GO:0005518collagenbinding//GO:0016787hydrolaseactivity//GO:0017171serinehydrolaseactivity//GO:0042166acetylcholinebinding//GO:0042803proteinhomodimerizationactivity//GO:0043236lamininbinding//GO:0043621proteinself-association	2.00582	1.00419	0.09653	0.153354	15.7095	3.97357	1.10944e-07	5.25343e-07	-7.83196	-2.96937	4.63431e-09	2.17473e-08	-3.31024	-2.22489	0.659138	-3.70625	-2.91422	-3.03497	-2.30234	-1.33735	0.609932	0.671971	0.695511
0.775142	0.188637	1.31826	0.574426	0.298595	-1.6465	-0.331306	-1.17725	ACIN1	chr14	23058564	23059474	-	9110	apoptotic chromatin condensation inducer 1	GO:0006397mRNAprocessing//GO:0008380RNAsplicing//GO:0030218erythrocytedifferentiation//GO:0030263apoptoticchromosomecondensation//GO:0045657positiveregulationofmonocytedifferentiation	GO:0005634nucleus//GO:0005654nucleoplasm//GO:0005829cytosol//GO:0005886plasmamembrane//GO:0016607nuclearspeck//GO:0061574ASAPcomplex	GO:0003676nucleicacidbinding//GO:0003723RNAbinding//GO:0005515proteinbinding//GO:0016887ATPhydrolysisactivity//GO:0019899enzymebinding	1.01496	0.0214265	0.584806	0.669833	-1.08919	-0.123257	0.00493255	0.0105599	1.10549	0.144684	0.000475778	0.00103009	7.74408	7.76407	7.62073	7.76767	7.72049	7.81135	7.75152	7.72934	7.57288	7.67867	7.61063
-0.545404	-1.25504	1.11123	-0.130965	-1.25019	-0.0342083	0.832436	1.27214	ACKR2	chr3	42804752	42804844	+	5460	atypical chemokine receptor 2	GO:0006897endocytosis//GO:0006935chemotaxis//GO:0006954inflammatoryresponse//GO:0006955immuneresponse//GO:0007186Gprotein-coupledreceptorsignalingpathway//GO:0007204positiveregulationofcytosoliccalciumionconcentration//GO:0007275multicellularorganismdevelopment//GO:0019722calcium-mediatedsignaling//GO:0060326cellchemotaxis//GO:0070098chemokine-mediatedsignalingpathway	GO:0005654nucleoplasm//GO:0005769earlyendosome//GO:0005829cytosol//GO:0005884actinfilament//GO:0005886plasmamembrane//GO:0005887integralcomponentofplasmamembrane//GO:0009897externalsideofplasmamembrane//GO:0031965nuclearmembrane//GO:0043231intracellularmembrane-boundedorganelle//GO:0055037recyclingendosome	GO:0004950chemokinereceptoractivity//GO:0005044scavengerreceptoractivity//GO:0005515proteinbinding//GO:0016493C-Cchemokinereceptoractivity//GO:0019957C-Cchemokinebinding	1.49223	0.577474	0.233394	0.31965	2.00994	1.00715	0.0408326	0.0700667	-1.34693	-0.429679	0.253949	0.319697	-2.34202	-1.83796	-1.35265	-2.12128	-2.56275	-1.09068	-1.86346	-2.55974	-1.80326	-1.26412	-0.990574
-0.400571	-2.21068	0.683709	0.69654	0.716558	0.526762	0.316948	-0.329266	ACKR3	chr2	236567787	236567841	+	2070	atypical chemokine receptor 3	GO:0001525angiogenesis//GO:0001570vasculogenesis//GO:0006955immuneresponse//GO:0007155celladhesion//GO:0007186Gprotein-coupledreceptorsignalingpathway//GO:0007204positiveregulationofcytosoliccalciumionconcentration//GO:0008285negativeregulationofcellpopulationproliferation//GO:0019722calcium-mediatedsignaling//GO:0031623receptorinternalization//GO:0060326cellchemotaxis//GO:0070098chemokine-mediat…	GO:0005634nucleus//GO:0005768endosome//GO:0005769earlyendosome//GO:0005886plasmamembrane//GO:0005905clathrin-coatedpit//GO:0009897externalsideofplasmamembrane//GO:0009986cellsurface//GO:0016021integralcomponentofmembrane//GO:0043231intracellularmembrane-boundedorganelle//GO:0048471perinuclearregionofcytoplasm//GO:0055037recyclingendosome	GO:0005044scavengerreceptoractivity//GO:0005515proteinbinding//GO:0015026coreceptoractivity//GO:0016493C-Cchemokinereceptoractivity//GO:0016494C-X-Cchemokinereceptoractivity//GO:0019957C-Cchemokinebinding//GO:0019958C-X-Cchemokinebinding	16.7101	4.06265	0.000470736	0.00135371	7.75116	2.95441	0.00929833	0.0186747	2.15582	1.10823	0.0326285	0.0512966	-5.93274	-1.85859	-2.93061	-4.09327	-7.77221	-1.88954	-1.86346	-1.82277	-2.20852	-2.63496	-3.94835
0.610023	0.566517	0.829235	0.911295	0.663302	-1.27514	-0.971178	-1.33405	ACLY	chr17	41866917	41867904	-	5208	ATP citrate lyase	GO:0006085acetyl-CoAbiosyntheticprocess//GO:0006101citratemetabolicprocess//GO:0006107oxaloacetatemetabolicprocess//GO:0006633fattyacidbiosyntheticprocess//GO:0006695cholesterolbiosyntheticprocess//GO:0008610lipidbiosyntheticprocess//GO:0015936coenzymeAmetabolicprocess	GO:0005576extracellularregion//GO:0005654nucleoplasm//GO:0005829cytosol//GO:0005886plasmamembrane//GO:0016020membrane//GO:0035578azurophilgranulelumen//GO:0070062extracellularexosome//GO:1904813ficolin-1-richgranulelumen	GO:0003878ATPcitratesynthaseactivity//GO:0005515proteinbinding//GO:0005524ATPbinding//GO:0046872metalionbinding	1.0364	0.0515797	0.142687	0.212932	-1.34444	-0.427	3.15324e-11	2.7313e-10	1.39337	0.47858	3.87566e-13	3.83395e-12	8.51271	8.56372	8.086	8.51791	8.5075	8.57041	8.59007	8.53067	8.06644	8.13924	8.05233
0.855978	-0.518241	-0.787376	0.241527	0.0845278	1.54534	-1.68927	0.267517	ACNATP	chr9	101334084	101334696	-	1225	acyl-CoA:amino acid N-acyltransferase pseudogene				-1.14933	-0.200791	0.745281	0.806269	-1.05595	-0.0785445	0.901129	0.926342	-1.08843	-0.122246	0.832875	0.865922	-3.31024	-3.48609	-3.37982	-2.93573	-3.68474	-3.83143	-3.27063	-3.35621	-2.55999	-4.32301	-3.25647
-0.976796	-1.30503	1.23649	1.32209	0.786734	-0.379214	-0.156316	-0.527967	ACO1	chr9	32384603	32384735	+	7555	aconitase 1	GO:0006099tricarboxylicacidcycle//GO:0006101citratemetabolicprocess//GO:0006417regulationoftranslation//GO:0006879cellularironionhomeostasis//GO:0009791post-embryonicdevelopment//GO:0010040responsetoiron(II)ion//GO:0050892intestinalabsorption	GO:0005737cytoplasm//GO:0005739mitochondrion//GO:0005783endoplasmicreticulum//GO:0005794Golgiapparatus//GO:0005829cytosol//GO:0070062extracellularexosome	GO:0003723RNAbinding//GO:0003994aconitatehydrataseactivity//GO:0005515proteinbinding//GO:0030350iron-responsiveelementbinding//GO:0046872metalionbinding//GO:0047780citratedehydrataseactivity//GO:00515383iron,4sulfurclusterbinding//GO:00515394iron,4sulfurclusterbinding	1.32223	0.402971	2.84839e-09	2.80927e-08	1.10156	0.13955	0.00401903	0.00874679	1.20032	0.263421	5.63719e-07	1.90756e-06	6.5016	6.90329	6.64162	6.53082	6.47238	6.9249	6.94014	6.84482	6.63722	6.67691	6.61074
-0.84201	-0.954884	-0.888817	-0.462843	-0.360493	1.31015	1.33501	0.863894	ACO2	chr22	41447830	41448032	+	11812	aconitase 2	GO:0001889liverdevelopment//GO:0006091generationofprecursormetabolitesandenergy//GO:0006099tricarboxylicacidcycle//GO:0006101citratemetabolicprocess//GO:0006102isocitratemetabolicprocess//GO:0035900responsetoisolationstress	GO:0005739mitochondrion//GO:0005759mitochondrialmatrix//GO:0005829cytosol	GO:0003994aconitatehydrataseactivity//GO:0005506ironionbinding//GO:0047780citratedehydrataseactivity//GO:00515383iron,4sulfurclusterbinding//GO:00515394iron,4sulfurclusterbinding	1.03012	0.0428149	0.268123	0.35799	1.2126	0.278105	2.31082e-07	1.03919e-06	-1.17714	-0.235291	5.08821e-07	1.73174e-06	7.3836	7.42777	7.66232	7.3912	7.37599	7.3849	7.4423	7.4561	7.68125	7.6846	7.62111
1.77189	0.136295	0.0629041	1.04533	-0.469136	-1.14164	-1.04473	-0.360909	ACOT1	chr14	73537143	73537878	+	1686	acyl-CoA thioesterase 1	GO:0000038verylong-chainfattyacidmetabolicprocess//GO:0001676long-chainfattyacidmetabolicprocess//GO:0006631fattyacidmetabolicprocess//GO:0006637acyl-CoAmetabolicprocess	GO:0005829cytosol	GO:0016290palmitoyl-CoAhydrolaseactivity//GO:0047617acyl-CoAhydrolaseactivity//GO:0052689carboxylicesterhydrolaseactivity//GO:0102991myristoyl-CoAhydrolaseactivity	-1.08565	-0.118553	0.519376	0.610187	-1.22251	-0.289847	0.148122	0.215324	1.12607	0.171294	0.344727	0.416653	0.45311	0.33299	0.160827	0.585669	0.320551	0.308655	0.4679	0.222416	0.113407	0.129116	0.239958
-0.74082	-0.550843	-1.01848	-0.607645	-0.650068	1.20949	1.37262	0.985742	ACOT11	chr1	54542257	54542437	+	9770	acyl-CoA thioesterase 11	GO:0006631fattyacidmetabolicprocess//GO:0006637acyl-CoAmetabolicprocess//GO:0009266responsetotemperaturestimulus//GO:0009409responsetocold//GO:0035556intracellularsignaltransduction//GO:0120163negativeregulationofcold-inducedthermogenesis	GO:0005759mitochondrialmatrix//GO:0005829cytosol//GO:0070062extracellularexosome	GO:0008289lipidbinding//GO:0016290palmitoyl-CoAhydrolaseactivity//GO:0036042long-chainfattyacyl-CoAbinding//GO:0047617acyl-CoAhydrolaseactivity//GO:0052689carboxylicesterhydrolaseactivity//GO:0102991myristoyl-CoAhydrolaseactivity	-1.02275	-0.0324478	0.586362	0.671212	1.38442	0.469277	4.6552e-08	2.34238e-07	-1.41591	-0.501725	1.86125e-09	9.30826e-09	4.50122	4.47229	4.97158	4.47688	4.52557	4.40571	4.51101	4.50014	4.97676	5.01857	4.91941
1.34258	1.06507	-0.656427	-1.43846	-1.09609	0.511497	-0.0416092	0.313436	ACOT13	chr6	24667035	24667344	+	4394	acyl-CoA thioesterase 13	GO:0051289proteinhomotetramerization//GO:0120163negativeregulationofcold-inducedthermogenesis	GO:0005634nucleus//GO:0005759mitochondrialmatrix//GO:0005819spindle//GO:0005829cytosol	GO:0005515proteinbinding//GO:0016290palmitoyl-CoAhydrolaseactivity//GO:0046872metalionbinding//GO:0047617acyl-CoAhydrolaseactivity//GO:0102991myristoyl-CoAhydrolaseactivity	-1.22637	-0.294391	6.63185e-06	2.87547e-05	-1.08933	-0.123439	0.023508	0.0429799	-1.1258	-0.170951	0.0013681	0.00274432	5.32691	5.0306	5.20372	5.34504	5.30878	5.08382	4.98162	5.02636	5.23644	5.16416	5.21056
0.10058	0.245258	-1.17323	-1.0977	-1.11628	0.991782	1.1202	0.929393	ACOT2	chr14	73567620	73568129	+	2239	acyl-CoA thioesterase 2	GO:0000038verylong-chainfattyacidmetabolicprocess//GO:0001676long-chainfattyacidmetabolicprocess//GO:0006631fattyacidmetabolicprocess//GO:0006637acyl-CoAmetabolicprocess	GO:0005739mitochondrion//GO:0005759mitochondrialmatrix//GO:0005782peroxisomalmatrix//GO:0005829cytosol	GO:0005515proteinbinding//GO:0016290palmitoyl-CoAhydrolaseactivity//GO:0047617acyl-CoAhydrolaseactivity//GO:0052689carboxylicesterhydrolaseactivity//GO:0102991myristoyl-CoAhydrolaseactivity	-1.32518	-0.406186	6.24408e-06	2.72637e-05	1.19858	0.261321	0.000680619	0.00173016	-1.58833	-0.667507	3.33433e-10	1.89567e-09	3.73909	3.33367	4.00092	3.71656	3.76161	3.31992	3.34344	3.33765	3.99407	4.03405	3.97464
1.10905	0.812561	0.391458	0.40734	0.719301	-0.804529	-1.04024	-1.59494	ACOT7	chr1	6264269	6264695	-	3500	acyl-CoA thioesterase 7	GO:0006631fattyacidmetabolicprocess//GO:0006637acyl-CoAmetabolicprocess//GO:0015937coenzymeAbiosyntheticprocess//GO:0036114medium-chainfatty-acyl-CoAcatabolicprocess//GO:0036116long-chainfatty-acyl-CoAcatabolicprocess//GO:0051792medium-chainfattyacidbiosyntheticprocess//GO:1900535palmiticacidbiosyntheticprocess	GO:0005654nucleoplasm//GO:0005739mitochondrion//GO:0005829cytosol//GO:0070062extracellularexosome	GO:0000062fatty-acyl-CoAbinding//GO:0005515proteinbinding//GO:0016290palmitoyl-CoAhydrolaseactivity//GO:0036042long-chainfattyacyl-CoAbinding//GO:0042803proteinhomodimerizationactivity//GO:0047617acyl-CoAhydrolaseactivity//GO:0052689carboxylicesterhydrolaseactivity//GO:0102991myristoyl-CoAhydrolaseactivity	-1.06453	-0.0902137	0.0673322	0.112816	-1.33205	-0.413649	2.23483e-08	1.18551e-07	1.25131	0.323436	2.53207e-07	9.00029e-07	6.18165	6.09284	5.77011	6.2106	6.1527	6.07046	6.07357	6.13449	5.83691	5.79088	5.68255
0.109752	-0.489427	0.102378	2.1002	-0.459949	0.504597	-0.69187	-1.17568	ACOT8	chr20	45841721	45841956	-	4354	acyl-CoA thioesterase 8	GO:0006637acyl-CoAmetabolicprocess//GO:0006699bileacidbiosyntheticprocess//GO:0009062fattyacidcatabolicprocess//GO:0016559peroxisomefission//GO:0033540fattyacidbeta-oxidationusingacyl-CoAoxidase//GO:0036109alpha-linolenicacidmetabolicprocess//GO:0043649dicarboxylicacidcatabolicprocess//GO:0045225negativeregulationofCD4production	GO:0005782peroxisomalmatrix//GO:0005829cytosol	GO:0003986acetyl-CoAhydrolaseactivity//GO:0004778succinyl-CoAhydrolaseactivity//GO:0005515proteinbinding//GO:0016289CoAhydrolaseactivity//GO:0016290palmitoyl-CoAhydrolaseactivity//GO:0033882choloyl-CoAhydrolaseactivity//GO:0044466glutaryl-CoAhydrolaseactivity//GO:0047603acetoacetyl-CoAhydrolaseactivity//GO:0047617acyl-CoAhydrolaseactivity//GO:0047994hydroxymethylglutaryl-CoAhydrolaseactivity//GO:…	1.02736	0.0389452	0.556986	0.644716	-1.01044	-0.0149844	0.827288	0.872629	1.03809	0.0539297	0.382596	0.455642	3.93149	3.97009	3.91824	3.94649	3.91648	3.94612	4.04619	3.91796	3.96627	3.90634	3.88211
0.948133	-0.0221272	-0.550609	-1.09595	-1.62601	1.00471	0.524917	0.816943	ACOT9	chrX	23701055	23703982	-	6244	acyl-CoA thioesterase 9	GO:0006637acyl-CoAmetabolicprocess	GO:0005739mitochondrion//GO:0005759mitochondrialmatrix	GO:0003986acetyl-CoAhydrolaseactivity//GO:0016290palmitoyl-CoAhydrolaseactivity//GO:0047617acyl-CoAhydrolaseactivity//GO:0052689carboxylicesterhydrolaseactivity	-1.17408	-0.231525	0.000692227	0.00191517	1.03386	0.0480379	0.422856	0.517616	-1.21383	-0.279563	3.28149e-05	8.47575e-05	5.02634	4.7899	5.07491	5.10016	4.95252	4.8721	4.78912	4.70847	5.10877	5.03576	5.0802
-0.996954	-1.1709	-0.19188	-0.413264	-0.677265	1.15368	1.16651	1.13008	ACOX1	chr17	75941507	75946795	-	8286	acyl-CoA oxidase 1	GO:0000038verylong-chainfattyacidmetabolicprocess//GO:0006091generationofprecursormetabolitesandenergy//GO:0006629lipidmetabolicprocess//GO:0006693prostaglandinmetabolicprocess//GO:0007283spermatogenesis//GO:0009062fattyacidcatabolicprocess//GO:0019395fattyacidoxidation//GO:0033540fattyacidbeta-oxidationusingacyl-CoAoxidase//GO:0050665hydrogenperoxidebiosyntheticprocess//GO:0055088lipidhomeostasi…	GO:0005777peroxisome//GO:0005778peroxisomalmembrane//GO:0005782peroxisomalmatrix//GO:0005829cytosol//GO:0016020membrane	GO:0003997acyl-CoAoxidaseactivity//GO:0005504fattyacidbinding//GO:0016401palmitoyl-CoAoxidaseactivity//GO:0030165PDZdomainbinding//GO:0042803proteinhomodimerizationactivity//GO:0047485proteinN-terminusbinding//GO:0050660flavinadeninedinucleotidebinding//GO:0071949FADbinding	1.16803	0.224073	0.000108474	0.000358407	1.68279	0.750852	1.44666e-13	1.94184e-12	-1.44071	-0.526779	1.09621e-11	8.14449e-11	5.98973	6.21042	6.74077	6.01897	5.96049	6.28962	6.2152	6.12644	6.74198	6.74629	6.73404
-0.0837683	-0.0656569	-1.01119	-1.20596	-0.934994	1.14488	1.10307	1.05362	ACOX2	chr3	58505136	58505286	-	3823	acyl-CoA oxidase 2	GO:0000038verylong-chainfattyacidmetabolicprocess//GO:0010942positiveregulationofcelldeath//GO:0033540fattyacidbeta-oxidationusingacyl-CoAoxidase//GO:0055088lipidhomeostasis//GO:1902884positiveregulationofresponsetooxidativestress	GO:0005777peroxisome//GO:0005782peroxisomalmatrix//GO:0005829cytosol//GO:0043231intracellularmembrane-boundedorganelle	GO:0003997acyl-CoAoxidaseactivity//GO:0005504fattyacidbinding//GO:0005515proteinbinding//GO:0016401palmitoyl-CoAoxidaseactivity//GO:00337913alpha,7alpha,12alpha-trihydroxy-5beta-cholestanoyl-CoA24-hydroxylaseactivity//GO:0042803proteinhomodimerizationactivity//GO:0050660flavinadeninedinucleotidebinding//GO:0071949FADbinding	-1.70259	-0.767733	3.66477e-11	6.05874e-10	1.89482	0.92206	8.76948e-14	1.22283e-12	-3.2261	-1.68979	1.55969e-19	6.72451e-18	4.65505	3.88854	5.57803	4.64794	4.66216	3.91958	3.76662	3.97942	5.61287	5.58003	5.54119
-0.84497	-0.281028	1.20924	1.27811	1.04868	-0.582421	-0.880712	-0.946901	ACOX3	chr4	8366282	8367080	-	3846	acyl-CoA oxidase 3, pristanoyl	GO:0033540fattyacidbeta-oxidationusingacyl-CoAoxidase//GO:0055088lipidhomeostasis	GO:0005777peroxisome//GO:0005782peroxisomalmatrix//GO:0005829cytosol//GO:0016020membrane	GO:0003997acyl-CoAoxidaseactivity//GO:0005504fattyacidbinding//GO:0016402pristanoyl-CoAoxidaseactivity//GO:0050660flavinadeninedinucleotidebinding//GO:0071949FADbinding	1.43202	0.518054	3.38994e-08	2.53619e-07	-1.05176	-0.0728009	0.296012	0.386585	1.50614	0.590855	8.90933e-10	4.69794e-09	4.14668	4.66292	4.07544	4.06311	4.23026	4.67197	4.69239	4.62439	4.14092	4.05251	4.03289
-1.04648	-1.84009	0.269494	0.909519	0.983294	0.783687	0.105038	-0.164471	ACOXL	chr2	110732539	110732774	+	8169	acyl-CoA oxidase like	GO:0008150biological_process//GO:0033540fattyacidbeta-oxidationusingacyl-CoAoxidase//GO:0055088lipidhomeostasis	GO:0005575cellular_component//GO:0005777peroxisome//GO:0005782peroxisomalmatrix	GO:0003674molecular_function//GO:0003997acyl-CoAoxidaseactivity//GO:0005504fattyacidbinding//GO:0050660flavinadeninedinucleotidebinding//GO:0071949FADbinding	1.17665	0.234689	0.219931	0.304312	1.1356	0.183459	0.354585	0.448872	1.03615	0.0512297	0.761695	0.805363	0.110828	0.349863	0.296915	0.154658	0.066998	0.300016	0.370712	0.378861	0.356813	0.281851	0.252082
0.00451775	-1.24024	-0.210684	-0.707405	1.5729	0.711171	0.916884	-1.04715	ACOXL-AS1	chr2	111098345	111101143	-	5839	ACOXL antisense RNA 1				1.39921	0.484611	0.399364	0.495807	1.40126	0.48672	0.413086	0.508018	-1.00146	-0.00210928	0.9965	0.997064	-2.98207	-2.44763	-2.46337	-2.58426	-3.37989	-2.72181	-3.03931	-1.58177	-2.13257	-2.00108	-3.25647
1.79203	1.24101	0.0820892	-0.472162	-0.512643	-0.60414	-1.09958	-0.426604	ACP1	chr2	264140	264498	+	4160	acid phosphatase 1	GO:0035335peptidyl-tyrosinedephosphorylation	GO:0005737cytoplasm//GO:0005829cytosol//GO:0009898cytoplasmicsideofplasmamembrane//GO:0042383sarcolemma//GO:0070062extracellularexosome	GO:0003993acidphosphataseactivity//GO:0004725proteintyrosinephosphataseactivity//GO:0004726non-membranespanningproteintyrosinephosphataseactivity//GO:0005515proteinbinding	-1.16124	-0.215666	2.875e-05	0.000108432	-1.20214	-0.265608	2.18895e-06	8.40469e-06	1.03522	0.0499418	0.202916	0.263016	6.95511	6.73807	6.6892	6.98801	6.92221	6.78381	6.71762	6.71278	6.70186	6.64269	6.72306
-1.69491	-1.53155	0.666298	0.604199	0.597931	0.440546	0.46742	0.450062	ACP2	chr11	47239302	47240249	-	3484	acid phosphatase 2, lysosomal	GO:0007040lysosomeorganization//GO:0016311dephosphorylation	GO:0005764lysosome//GO:0005765lysosomalmembrane//GO:0016020membrane//GO:0016021integralcomponentofmembrane//GO:0043202lysosomallumen//GO:0070062extracellularexosome	GO:0003993acidphosphataseactivity//GO:0005515proteinbinding//GO:0016791phosphataseactivity	1.63894	0.712763	1.26708e-12	3.37009e-11	1.5779	0.658003	9.47125e-12	9.00866e-11	1.03869	0.0547591	0.206996	0.267595	4.71082	5.42286	5.36868	4.68481	4.73683	5.43671	5.41693	5.41494	5.36482	5.37338	5.36785
0.923227	0.208175	0.498311	1.15667	0.649706	-1.25182	-1.35993	-0.82434	ACP3	chr3	132317369	132317576	+	4280	acid phosphatase 3	GO:0006144purinenucleobasemetabolicprocess//GO:0006772thiaminemetabolicprocess//GO:0007040lysosomeorganization//GO:0009117nucleotidemetabolicprocess//GO:0016311dephosphorylation//GO:0035335peptidyl-tyrosinedephosphorylation//GO:0046085adenosinemetabolicprocess//GO:0051930regulationofsensoryperceptionofpain//GO:0060168positiveregulationofadenosinereceptorsignalingpathway	GO:0005615extracellularspace//GO:0005634nucleus//GO:0005764lysosome//GO:0005765lysosomalmembrane//GO:0005829cytosol//GO:0005886plasmamembrane//GO:0012506vesiclemembrane//GO:0016021integralcomponentofmembrane//GO:0030175filopodium//GO:0035577azurophilgranulemembrane//GO:0070062extracellularexosome	GO:0003993acidphosphataseactivity//GO:0004725proteintyrosinephosphataseactivity//GO:0005515proteinbinding//GO:00082535'-nucleotidaseactivity//GO:0016791phosphataseactivity//GO:0042131thiaminephosphatephosphataseactivity//GO:0042802identicalproteinbinding//GO:0042803proteinhomodimerizationactivity//GO:0052642lysophosphatidicacidphosphataseactivity	1.03821	0.0541003	0.617784	0.698896	-1.40378	-0.489319	0.000501457	0.0013016	1.45742	0.543419	5.13416e-05	0.000128774	2.29206	2.3503	1.79999	2.39488	2.18924	2.27268	2.46201	2.31622	1.76938	1.73829	1.89231
-1.44295	0.751015	0.499426	0.676211	-1.35955	0.57278	-0.692502	0.995573	ACP4	chr19	50790415	50790525	+	1342	acid phosphatase 4	GO:0007040lysosomeorganization//GO:0010955negativeregulationofproteinprocessing//GO:0010977negativeregulationofneuronprojectiondevelopment//GO:0016311dephosphorylation//GO:0042476odontogenesis//GO:0048168regulationofneuronalsynapticplasticity//GO:0120154negativeregulationofERBB4signalingpathway//GO:1990264peptidyl-tyrosinedephosphorylationinvolvedininactivationofproteinkinaseactivity	GO:0005764lysosome//GO:0016021integralcomponentofmembrane//GO:0045211postsynapticmembrane	GO:0003993acidphosphataseactivity//GO:0004725proteintyrosinephosphataseactivity//GO:0016791phosphataseactivity//GO:0030971receptortyrosinekinasebinding	1.07933	0.110134	0.79558	0.846566	1.14499	0.19533	0.654894	0.730273	-1.06083	-0.0851969	0.823957	0.858125	-2.26179	-2.17811	-2.07426	-2.58426	-1.93932	-2.01327	-1.96131	-2.55974	-1.99171	-2.36365	-1.86743
-0.651949	-0.58212	-0.825012	-0.735204	-0.815197	1.20302	1.26486	1.1416	ACP5	chr19	11574653	11575252	-	4351	acid phosphatase 5, tartrate resistant	GO:0016311dephosphorylation//GO:0032496responsetolipopolysaccharide//GO:0032691negativeregulationofinterleukin-1betaproduction//GO:0032695negativeregulationofinterleukin-12production//GO:0032720negativeregulationoftumornecrosisfactorproduction//GO:0032929negativeregulationofsuperoxideaniongeneration//GO:0034097responsetocytokine//GO:0045019negativeregulationofnitricoxidebiosyntheticprocess//GO:00…	GO:0005764lysosome//GO:0005829cytosol//GO:0016021integralcomponentofmembrane	GO:0003993acidphosphataseactivity//GO:0008198ferrousironbinding//GO:0008199ferricironbinding	-1.18986	-0.250788	0.0212278	0.0412388	6.04795	2.59645	1.28545e-19	6.5209e-18	-7.1962	-2.84723	1.41656e-21	1.08163e-19	2.78066	2.53123	5.37847	2.73083	2.83049	2.48383	2.61201	2.49784	5.37827	5.46652	5.29061
0.739737	0.835451	-0.99709	-1.51112	-1.04882	0.520886	0.86945	0.591499	ACP6	chr1	147629652	147631065	-	11993	acid phosphatase 6, lysophosphatidic	GO:0002244hematopoieticprogenitorcelldifferentiation//GO:0006644phospholipidmetabolicprocess//GO:0006654phosphatidicacidbiosyntheticprocess//GO:0016311dephosphorylation//GO:2001311lysobisphosphatidicacidmetabolicprocess	GO:0005737cytoplasm//GO:0005739mitochondrion//GO:0005759mitochondrialmatrix	GO:0003993acidphosphataseactivity//GO:0016791phosphataseactivity//GO:0052642lysophosphatidicacidphosphataseactivity	-1.30165	-0.380341	1.70856e-07	1.07275e-06	-1.01712	-0.0244931	0.632683	0.711781	-1.27974	-0.355848	1.36949e-07	5.08006e-07	5.2875	4.90641	5.26297	5.27826	5.29674	4.94283	4.84356	4.93284	5.23599	5.30331	5.24963
0.557295	-0.00728543	1.48653	0.278488	0.715603	-0.612102	-0.665814	-1.75271	ACRBP	chr12	6638075	6638404	-	2816	acrosin binding protein	GO:0001675acrosomeassembly//GO:0007286spermatiddevelopment//GO:0008150biological_process//GO:0009566fertilization	GO:0001669acrosomalvesicle//GO:0002080acrosomalmembrane//GO:0005576extracellularregion//GO:0005634nucleus	GO:0003674molecular_function	1.07379	0.102714	0.306168	0.399101	-1.17129	-0.228094	0.0430161	0.073386	1.25772	0.330809	0.00204552	0.0039866	2.61989	2.7155	2.39722	2.66879	2.57098	2.82978	2.62049	2.69622	2.4662	2.45689	2.26859
1.02227	1.21142	0.0342184	-0.248444	1.02902	-0.595435	-1.19184	-1.26121	ACRV1	chr11	125671522	125672717	-	1963	acrosomal vesicle protein 1	GO:0007275multicellularorganismdevelopment	GO:0001669acrosomalvesicle	GO:0005515proteinbinding	-1.48813	-0.573501	0.108126	0.168961	-2.61363	-1.38605	0.00304777	0.00680441	1.75632	0.812553	0.0600211	0.0890608	-1.35757	-1.90364	-2.73559	-1.41867	-1.29647	-2.05699	-2.23961	-1.41431	-2.46378	-2.84908	-2.8939
-0.565094	-1.43258	1.46425	0.546818	1.2123	-0.0334546	-0.640021	-0.552213	ACSBG1	chr15	78167468	78171529	-	8148	acyl-CoA synthetase bubblegum family member 1	GO:0000038verylong-chainfattyacidmetabolicprocess//GO:0001676long-chainfattyacidmetabolicprocess//GO:0035338long-chainfatty-acyl-CoAbiosyntheticprocess//GO:0042552myelination//GO:0042759long-chainfattyacidbiosyntheticprocess//GO:0051384responsetoglucocorticoid	GO:0005737cytoplasm//GO:0005783endoplasmicreticulum//GO:0005829cytosol//GO:0005886plasmamembrane//GO:0031410cytoplasmicvesicle	GO:0004467long-chainfattyacid-CoAligaseactivity//GO:0005524ATPbinding//GO:0016405CoA-ligaseactivity//GO:0031957verylong-chainfattyacid-CoAligaseactivity	3.30351	1.724	0.000645635	0.00180101	1.39108	0.47621	0.345696	0.439269	2.37477	1.24779	0.0018126	0.00356166	-2.65959	-0.949635	-2.17276	-2.30186	-3.01732	-0.628151	-1.3848	-0.835949	-1.86339	-2.36365	-2.29123
0.439499	1.26605	0.500991	0.438289	0.612067	-0.460252	-1.76149	-1.03515	ACSBG2	chr19	6135247	6135360	+	3447	acyl-CoA synthetase bubblegum family member 2	GO:0006631fattyacidmetabolicprocess//GO:0007283spermatogenesis//GO:0030154celldifferentiation//GO:0035338long-chainfatty-acyl-CoAbiosyntheticprocess//GO:0042759long-chainfattyacidbiosyntheticprocess	GO:0005737cytoplasm//GO:0005739mitochondrion//GO:0005829cytosol//GO:0016020membrane	GO:0004467long-chainfattyacid-CoAligaseactivity//GO:0005524ATPbinding//GO:0016405CoA-ligaseactivity//GO:0031957verylong-chainfattyacid-CoAligaseactivity//GO:0047617acyl-CoAhydrolaseactivity//GO:0047676arachidonate-CoAligaseactivity	-1.09836	-0.135349	0.792094	0.844381	-1.71676	-0.779687	0.18654	0.261991	1.56302	0.644337	0.237085	0.30109	-2.98393	-3.11869	-3.76216	-3.14985	-2.81801	-3.12517	-3.15034	-3.08057	-3.51108	-4.0335	-3.74189
0.401168	0.443531	-1.35239	-1.09278	-1.09158	0.942794	0.808018	0.941236	ACSF2	chr17	50426158	50426389	+	5797	acyl-CoA synthetase family member 2	GO:0001676long-chainfattyacidmetabolicprocess//GO:0006631fattyacidmetabolicprocess//GO:0006637acyl-CoAmetabolicprocess	GO:0005759mitochondrialmatrix	GO:0004467long-chainfattyacid-CoAligaseactivity//GO:0005515proteinbinding//GO:0005524ATPbinding//GO:0031956medium-chainfattyacid-CoAligaseactivity//GO:0047760butyrate-CoAligaseactivity	-1.74173	-0.800523	3.80749e-12	8.53621e-11	1.17783	0.236133	0.000296019	0.000799558	-2.05147	-1.03666	3.04457e-15	4.69243e-14	4.80716	4.01205	5.04302	4.79664	4.81768	3.92591	4.05482	4.05542	5.06559	4.99867	5.06482
-1.34996	-0.031344	-0.232588	-0.989207	-0.604941	0.605993	1.41392	1.18813	ACSF3	chr16	89088375	89088478	+	14575	acyl-CoA synthetase family member 3	GO:0006631fattyacidmetabolicprocess//GO:0006633fattyacidbiosyntheticprocess//GO:0035338long-chainfatty-acyl-CoAbiosyntheticprocess//GO:0090410malonatecatabolicprocess	GO:0005739mitochondrion//GO:0005759mitochondrialmatrix	GO:0005515proteinbinding//GO:0005524ATPbinding//GO:0016405CoA-ligaseactivity//GO:0016878acid-thiolligaseactivity//GO:0031957verylong-chainfattyacid-CoAligaseactivity//GO:0090409malonyl-CoAsynthetaseactivity	1.01002	0.0143883	0.828409	0.872929	1.18965	0.250534	0.000995436	0.00244837	-1.17784	-0.236146	0.000568617	0.0012162	4.31041	4.32197	4.55932	4.21717	4.40366	4.37519	4.26819	4.32253	4.49379	4.60805	4.57612
-1.64812	-1.51281	0.541776	0.437807	0.0719684	0.823007	0.640218	0.646152	ACSL1	chr4	184755595	184757265	-	6134	acyl-CoA synthetase long chain family member 1	GO:0000038verylong-chainfattyacidmetabolicprocess//GO:0001676long-chainfattyacidmetabolicprocess//GO:0007584responsetonutrient//GO:0008610lipidbiosyntheticprocess//GO:0009410responsetoxenobioticstimulus//GO:0010747positiveregulationoflong-chainfattyacidimportacrossplasmamembrane//GO:0014070responsetoorganiccycliccompound//GO:0015908fattyacidtransport//GO:0019432triglyceridebiosyntheticprocess//GO…	GO:0005739mitochondrion//GO:0005741mitochondrialoutermembrane//GO:0005778peroxisomalmembrane//GO:0005783endoplasmicreticulum//GO:0005789endoplasmicreticulummembrane//GO:0005886plasmamembrane//GO:0016020membrane//GO:0016021integralcomponentofmembrane	GO:0004467long-chainfattyacid-CoAligaseactivity//GO:0005524ATPbinding//GO:0047676arachidonate-CoAligaseactivity//GO:0050197phytanate-CoAligaseactivity//GO:0070251pristanate-CoAligaseactivity//GO:0090434oleoyl-CoAligaseactivity	1.2446	0.31568	7.82065e-09	6.84121e-08	1.29379	0.371603	5.02758e-10	3.48834e-09	-1.03952	-0.0559231	0.0852555	0.121877	7.80816	8.12254	8.17995	7.79714	7.81917	8.15368	8.13675	8.07719	8.19946	8.1697	8.17067
-0.0524998	-0.160455	0.935052	1.16015	1.22636	-1.03725	-1.15	-0.921348	ACSL3	chr2	222860942	222861258	+	14436	acyl-CoA synthetase long chain family member 3	GO:0001676long-chainfattyacidmetabolicprocess//GO:0006631fattyacidmetabolicprocess//GO:0006633fattyacidbiosyntheticprocess//GO:0007420braindevelopment//GO:0007584responsetonutrient//GO:0014070responsetoorganiccycliccompound//GO:0030182neurondifferentiation//GO:0034379very-low-densitylipoproteinparticleassembly//GO:0035336long-chainfatty-acyl-CoAmetabolicprocess//GO:0035338long-chainfatty-acyl-CoA…	GO:0005741mitochondrialoutermembrane//GO:0005778peroxisomalmembrane//GO:0005783endoplasmicreticulum//GO:0005789endoplasmicreticulummembrane//GO:0005794Golgiapparatus//GO:0005811lipiddroplet//GO:0005886plasmamembrane//GO:0016020membrane//GO:0016021integralcomponentofmembrane//GO:0048471perinuclearregionofcytoplasm	GO:0004467long-chainfattyacid-CoAligaseactivity//GO:0005515proteinbinding//GO:0005524ATPbinding//GO:0019901proteinkinasebinding//GO:0019904proteindomainspecificbinding//GO:0047676arachidonate-CoAligaseactivity//GO:0090433palmitoyl-CoAligaseactivity	1.17604	0.233933	9.26898e-07	4.90202e-06	-1.1327	-0.179764	5.2515e-05	0.000160713	1.33209	0.413696	8.52522e-12	6.50214e-11	7.72743	7.96242	7.54743	7.73789	7.71698	7.92909	7.97267	7.98549	7.54722	7.52539	7.56966
-0.147852	-0.479289	1.39731	1.23878	0.762174	-1.08399	-1.04632	-0.640813	ACSL4	chrX	109624244	109624321	-	9971	acyl-CoA synthetase long chain family member 4	GO:0001676long-chainfattyacidmetabolicprocess//GO:0006629lipidmetabolicprocess//GO:0006631fattyacidmetabolicprocess//GO:0007584responsetonutrient//GO:0015908fattyacidtransport//GO:0019432triglyceridebiosyntheticprocess//GO:0030182neurondifferentiation//GO:0032024positiveregulationofinsulinsecretion//GO:0035336long-chainfatty-acyl-CoAmetabolicprocess//GO:0035338long-chainfatty-acyl-CoAbiosynthetic…	GO:0005737cytoplasm//GO:0005741mitochondrialoutermembrane//GO:0005778peroxisomalmembrane//GO:0005783endoplasmicreticulum//GO:0005789endoplasmicreticulummembrane//GO:0005811lipiddroplet//GO:0005886plasmamembrane//GO:0016020membrane//GO:0016021integralcomponentofmembrane//GO:0043025neuronalcellbody//GO:0044233mitochondria-associatedendoplasmicreticulummembrane//GO:0070062extracellularexosome	GO:0004467long-chainfattyacid-CoAligaseactivity//GO:0005524ATPbinding//GO:0031957verylong-chainfattyacid-CoAligaseactivity//GO:0047676arachidonate-CoAligaseactivity//GO:0090433palmitoyl-CoAligaseactivity	1.17444	0.231979	8.55318e-06	3.62642e-05	-1.06917	-0.0964868	0.0296871	0.0528435	1.25568	0.328466	8.83007e-09	3.96746e-08	7.15481	7.3851	7.05766	7.1812	7.12843	7.42722	7.40198	7.3261	7.03214	7.03814	7.10271
0.264991	0.0205667	-1.08772	-1.14039	-1.11967	1.14319	0.811495	1.10754	ACSL5	chr10	112374116	112374269	+	4137	acyl-CoA synthetase long chain family member 5	GO:0001676long-chainfattyacidmetabolicprocess//GO:0008610lipidbiosyntheticprocess//GO:0010747positiveregulationoflong-chainfattyacidimportacrossplasmamembrane//GO:0035338long-chainfatty-acyl-CoAbiosyntheticprocess	GO:0005654nucleoplasm//GO:0005730nucleolus//GO:0005739mitochondrion//GO:0005741mitochondrialoutermembrane//GO:0005783endoplasmicreticulum//GO:0005789endoplasmicreticulummembrane//GO:0005886plasmamembrane//GO:0016020membrane//GO:0016021integralcomponentofmembrane	GO:0004467long-chainfattyacid-CoAligaseactivity//GO:0005515proteinbinding//GO:0005524ATPbinding//GO:0047676arachidonate-CoAligaseactivity	-1.26338	-0.337293	2.56691e-08	1.98678e-07	1.1772	0.235355	5.57465e-06	2.01044e-05	-1.48725	-0.572649	1.55585e-13	1.68093e-12	7.08983	6.75243	7.32517	7.12259	7.05707	6.75999	6.74587	6.75142	7.358	7.26908	7.34844
-0.35521	-0.437686	-0.818325	-0.86701	-1.05013	1.1294	1.14924	1.24973	ACSL6	chr5	131949973	131954371	-	16996	acyl-CoA synthetase long chain family member 6	GO:0000038verylong-chainfattyacidmetabolicprocess//GO:0001676long-chainfattyacidmetabolicprocess//GO:0006637acyl-CoAmetabolicprocess//GO:0008610lipidbiosyntheticprocess//GO:0035338long-chainfatty-acyl-CoAbiosyntheticprocess	GO:0005741mitochondrialoutermembrane//GO:0005778peroxisomalmembrane//GO:0005783endoplasmicreticulum//GO:0005789endoplasmicreticulummembrane//GO:0005886plasmamembrane//GO:0016020membrane//GO:0016021integralcomponentofmembrane	GO:0004467long-chainfattyacid-CoAligaseactivity//GO:0005524ATPbinding//GO:0042803proteinhomodimerizationactivity//GO:0047676arachidonate-CoAligaseactivity	-1.36288	-0.446661	6.53599e-06	2.8398e-05	2.62105	1.39014	5.25925e-16	1.14124e-14	-3.57218	-1.83681	3.52589e-19	1.37098e-17	3.82406	3.36897	5.2127	3.86048	3.78765	3.45153	3.40854	3.24684	5.17144	5.18896	5.2777
1.26672	1.21318	-1.07693	-1.12218	-1.12518	0.258008	0.296096	0.290295	ACSM3	chr16	20610243	20610310	+	7510	acyl-CoA synthetase medium chain family member 3	GO:0006633fattyacidbiosyntheticprocess//GO:0006637acyl-CoAmetabolicprocess//GO:0008217regulationofbloodpressure//GO:0042632cholesterolhomeostasis	GO:0005739mitochondrion//GO:0005759mitochondrialmatrix	GO:0004321fatty-acyl-CoAsynthaseactivity//GO:0005524ATPbinding//GO:0015645fattyacidligaseactivity//GO:0043759methylbutanoate-CoAligaseactivity//GO:0046872metalionbinding//GO:0047760butyrate-CoAligaseactivity//GO:0050218propionate-CoAligaseactivity	-4.64969	-2.21713	3.97949e-18	9.33149e-16	-1.87322	-0.90552	8.96771e-12	8.583e-11	-2.48219	-1.31161	4.93184e-13	4.76793e-12	4.10913	1.88977	3.20318	4.13444	4.08383	1.91923	1.87646	1.87363	3.18101	3.21701	3.21153
0.814111	0.62413	-1.22789	-0.917168	-1.43387	0.811558	0.643745	0.685385	ACSS1	chr20	25006230	25006925	-	8691	acyl-CoA synthetase short chain family member 1	GO:0006069ethanoloxidation//GO:0006085acetyl-CoAbiosyntheticprocess//GO:0019413acetatebiosyntheticprocess//GO:0019427acetyl-CoAbiosyntheticprocessfromacetate//GO:0019542propionatebiosyntheticprocess	GO:0005759mitochondrialmatrix	GO:0003987acetate-CoAligaseactivity//GO:0005515proteinbinding//GO:0005524ATPbinding//GO:0016208AMPbinding//GO:0050218propionate-CoAligaseactivity	-1.36196	-0.445685	4.09638e-09	3.86369e-08	-1.00116	-0.00167035	0.972111	0.979557	-1.36038	-0.444015	9.48375e-10	4.97475e-09	5.74671	5.30016	5.74541	5.76889	5.72452	5.29201	5.36457	5.2439	5.76829	5.7291	5.73883
-0.111583	-0.0817608	1.19078	1.11696	1.00285	-0.878345	-0.993412	-1.24549	ACSS2	chr20	34872146	34872403	+	5248	acyl-CoA synthetase short chain family member 2	GO:0006069ethanoloxidation//GO:0008610lipidbiosyntheticprocess//GO:0019413acetatebiosyntheticprocess//GO:0019427acetyl-CoAbiosyntheticprocessfromacetate//GO:0019542propionatebiosyntheticprocess	GO:0005654nucleoplasm//GO:0005737cytoplasm//GO:0005759mitochondrialmatrix//GO:0005829cytosol//GO:0043231intracellularmembrane-boundedorganelle	GO:0003987acetate-CoAligaseactivity//GO:0005524ATPbinding//GO:0016208AMPbinding//GO:0050218propionate-CoAligaseactivity	1.32418	0.405097	2.03792e-09	2.07126e-08	-1.24709	-0.318569	2.95756e-07	1.30626e-06	1.65137	0.723666	5.39175e-15	7.85187e-14	6.60154	7.00547	6.28438	6.59653	6.60656	7.03483	7.00999	6.97158	6.33848	6.29975	6.21492
-0.0613127	-0.0914951	0.89912	0.957849	1.35595	-1.16991	-1.31135	-0.578852	ACSS3	chr12	80936414	80940246	+	18465	acyl-CoA synthetase short chain family member 3	GO:0046951ketonebodybiosyntheticprocess	GO:0005739mitochondrion//GO:0005759mitochondrialmatrix//GO:0043231intracellularmembrane-boundedorganelle	GO:0003987acetate-CoAligaseactivity//GO:0005515proteinbinding//GO:0005524ATPbinding//GO:0047760butyrate-CoAligaseactivity//GO:0050218propionate-CoAligaseactivity	2.67295	1.41843	5.4201e-05	0.000191504	-2.24658	-1.16773	0.00966409	0.0193383	6.005	2.58616	2.17244e-07	7.80284e-07	-1.18335	0.261107	-2.37131	-1.16435	-1.20235	0.0447593	0.118694	0.619869	-2.55999	-2.73805	-1.8159
-0.939501	-0.47502	-0.298453	-1.58583	0.633449	0.356615	1.3714	0.937338	ACTA1	chr1	229430365	229431642	-	2381	actin alpha 1, skeletal muscle	GO:0006936musclecontraction//GO:0009612responsetomechanicalstimulus//GO:0009991responsetoextracellularstimulus//GO:0010226responsetolithiumion//GO:0010628positiveregulationofgeneexpression//GO:0030240skeletalmusclethinfilamentassembly//GO:0043503skeletalmusclefiberadaptation//GO:0048545responsetosteroidhormone//GO:0048741skeletalmusclefiberdevelopment//GO:0071417cellularresponsetoorganonitrogenco…	GO:0001725stressfiber//GO:0005615extracellularspace//GO:0005829cytosol//GO:0005865striatedmusclethinfilament//GO:0005869dynactincomplex//GO:0005884actinfilament//GO:0015629actincytoskeleton//GO:0030017sarcomere//GO:0030027lamellipodium//GO:0030175filopodium//GO:0044297cellbody//GO:0070062extracellularexosome//GO:0072562bloodmicroparticle	GO:0005200structuralconstituentofcytoskeleton//GO:0005515proteinbinding//GO:0005524ATPbinding//GO:0017022myosinbinding//GO:0043531ADPbinding	1.20486	0.268869	0.722571	0.788034	3.07664	1.62136	0.027909	0.0501366	-2.55352	-1.35249	0.0250409	0.0402631	-4.0998	-3.80668	-2.48869	-4.33428	-3.86532	-3.68704	-4.98684	-2.74615	-3.02566	-2.00108	-2.43933
-1.01345	-0.923748	-0.740024	-0.351491	-0.505698	1.16709	1.30305	1.06426	ACTA2	chr10	88935074	88935366	-	2976	actin alpha 2, smooth muscle	GO:0008217regulationofbloodpressure//GO:0009615responsetovirus//GO:0010628positiveregulationofgeneexpression//GO:0014829vascularassociatedsmoothmusclecontraction//GO:0072144glomerularmesangialcelldevelopment//GO:0090131mesenchymemigration	GO:0005615extracellularspace//GO:0005737cytoplasm//GO:0005829cytosol//GO:0005869dynactincomplex//GO:0030027lamellipodium//GO:0030175filopodium//GO:0030485smoothmusclecontractilefiber//GO:0032991protein-containingcomplex//GO:0044297cellbody//GO:0070062extracellularexosome	GO:0005524ATPbinding//GO:0019901proteinkinasebinding	1.30163	0.380315	0.0104173	0.0219201	3.80424	1.92761	2.1894e-13	2.86191e-12	-2.92268	-1.54729	1.19865e-13	1.3192e-12	1.63248	2.0247	3.56278	1.59215	1.67281	1.83801	2.18737	2.04871	3.55285	3.67511	3.46039
0.222378	1.32132	-0.00187617	-1.3682	0.221011	-1.353	1.18417	-0.225793	ACTA2-AS1	chr10	88932390	88932959	+	3183	ACTA2 antisense RNA 1				-1.35877	-0.442305	0.21128	0.294523	-1.26621	-0.340521	0.348048	0.441788	-1.0731	-0.101784	0.768673	0.811845	-1.2423	-1.68695	-1.59013	-1.45386	-1.03074	-1.5402	-2.06627	-1.45439	-2.06042	-1.08355	-1.62642
1.63851	1.38912	-0.288533	-0.233401	-0.0162287	-0.662349	-0.649216	-1.1779	ACTB	chr7	5526409	5527891	-	4405	actin beta	GO:0000079regulationofcyclin-dependentproteinserine/threoninekinaseactivity//GO:0001738morphogenesisofapolarizedepithelium//GO:0001895retinahomeostasis//GO:0006338chromatinremodeling//GO:0007163establishmentormaintenanceofcellpolarity//GO:0007409axonogenesis//GO:0021762substantianigradevelopment//GO:0022898regulationoftransmembranetransporteractivity//GO:0032091negativeregulationofproteinbinding/…	GO:0000785chromatin//GO:0005615extracellularspace//GO:0005634nucleus//GO:0005654nucleoplasm//GO:0005737cytoplasm//GO:0005829cytosol//GO:0005856cytoskeleton//GO:0005884actinfilament//GO:0005886plasmamembrane//GO:0005911cell-celljunction//GO:0005912adherensjunction//GO:0005925focaladhesion//GO:0015629actincytoskeleton//GO:0016020membrane//GO:0030027lamellipodium//GO:0030424axon//GO:0030863corticalc…	GO:0005200structuralconstituentofcytoskeleton//GO:0005515proteinbinding//GO:0005524ATPbinding//GO:0019894kinesinbinding//GO:0019901proteinkinasebinding//GO:0030957Tatproteinbinding//GO:0031492nucleosomalDNAbinding//GO:0042802identicalproteinbinding//GO:0048156tauproteinbinding//GO:0050998nitric-oxidesynthasebinding//GO:0098973structuralconstituentofpostsynapticactincytoskeleton	-1.27428	-0.349679	5.44239e-11	8.59561e-10	-1.39838	-0.483755	1.26705e-13	1.71984e-12	1.09739	0.134076	7.26323e-05	0.000178283	11.7938	11.445	11.311	11.8195	11.7681	11.4225	11.4339	11.4786	11.3455	11.3482	11.2393
-1.24817	-1.64208	0.284879	-0.110024	-0.0933769	0.86645	1.02855	0.913778	ACTBL2	chr5	57480018	57482811	-	2794	actin beta like 2	GO:0007409axonogenesis//GO:0008150biological_process//GO:0048870cellmotility//GO:0098974postsynapticactincytoskeletonorganization	GO:0005615extracellularspace//GO:0005737cytoplasm//GO:0005884actinfilament//GO:0016020membrane//GO:0030424axon//GO:0035267NuA4histoneacetyltransferasecomplex//GO:0045202synapse//GO:0070062extracellularexosome//GO:0098978glutamatergicsynapse	GO:0003674molecular_function//GO:0005515proteinbinding//GO:0005524ATPbinding//GO:0019901proteinkinasebinding//GO:0098973structuralconstituentofpostsynapticactincytoskeleton	4.07347	2.02626	0.000546803	0.00155322	9.39907	3.23252	1.0063e-06	4.07627e-06	-2.30739	-1.20626	8.99183e-05	0.00021776	-3.4173	-1.41809	-0.183629	-3.14985	-3.68474	-1.06813	-1.60437	-1.58177	-0.278423	-0.0583079	-0.214157
-0.166823	1.07315	0.767389	1.26306	0.162692	-1.06606	-0.566152	-1.46725	ACTBP1	chrX	46288016	46289128	-	1113	ACTB pseudogene 1				1.12739	0.172983	0.780366	0.835289	-1.81384	-0.859051	0.239621	0.324694	2.04491	1.03203	0.12129	0.167151	-3.73658	-3.57671	-4.59169	-4.09327	-3.37989	-3.5558	-3.27063	-3.90369	-4.61062	-4.32301	-4.84143
1.1777	0.285414	-1.87895	-0.432596	-0.455786	1.1426	-0.298439	0.460059	ACTBP2	chr5	77784881	77786003	+	1123	ACTB pseudogene 2				-2.31948	-1.2138	0.0650555	0.109603	-1.16269	-0.217467	0.70915	0.777234	-1.99493	-0.996335	0.113703	0.157765	-3.0646	-4.23348	-3.27436	-2.74932	-3.37989	-4.90944	-3.8873	-3.90369	-2.77412	-3.7925	-3.25647
1.54939	1.39331	-0.0463643	0.0281308	-0.140952	-0.783057	-0.897357	-1.1031	ACTG1	chr17	81509413	81510833	-	4052	actin gamma 1	GO:0001525angiogenesis//GO:0001738morphogenesisofapolarizedepithelium//GO:0001895retinahomeostasis//GO:0010628positiveregulationofgeneexpression//GO:0030335positiveregulationofcellmigration//GO:0035633maintenanceofblood-brainbarrier//GO:0045214sarcomereorganization//GO:0048488synapticvesicleendocytosis//GO:0051492regulationofstressfiberassembly//GO:0051893regulationoffocaladhesionassembly//GO:007…	GO:0005615extracellularspace//GO:0005634nucleus//GO:0005829cytosol//GO:0005856cytoskeleton//GO:0005884actinfilament//GO:0005886plasmamembrane//GO:0005911cell-celljunction//GO:0005925focaladhesion//GO:0016020membrane//GO:0030016myofibril//GO:0031941filamentousactin//GO:0043296apicaljunctioncomplex//GO:0044305calyxofHeld//GO:0045335phagocyticvesicle//GO:0070062extracellularexosome//GO:0072562bloodm…	GO:0005200structuralconstituentofcytoskeleton//GO:0005515proteinbinding//GO:0005522profilinbinding//GO:0005524ATPbinding//GO:0031625ubiquitinproteinligasebinding//GO:0042802identicalproteinbinding//GO:0098973structuralconstituentofpostsynapticactincytoskeleton	-1.37185	-0.456118	7.15114e-14	2.80432e-12	-1.6462	-0.719142	8.6368e-18	2.78886e-16	1.19999	0.263025	1.01172e-09	5.28333e-09	11.6053	11.1489	10.887	11.6287	11.5819	11.1509	11.1732	11.1226	10.9303	10.8961	10.8345
-1.44383	-0.631132	1.32692	1.1108	0.802303	-0.880786	0.0347028	-0.318976	ACTG1P1	chr3	139493809	139494937	+	1129	actin gamma 1 pseudogene 1				2.69852	1.43217	0.00449818	0.0103141	1.35733	0.440774	0.395361	0.490493	1.98811	0.991394	0.0149667	0.0251801	-2.99898	-1.58592	-2.5658	-3.27015	-2.72781	-1.42115	-1.56538	-1.77124	-2.89441	-2.28348	-2.5195
0.208688	1.68173	-1.04123	-0.165413	-1.26805	-0.633968	0.972994	0.245249	ACTG1P10	chrX	53142832	53143913	-	1082	actin gamma 1 pseudogene 10				-2.27837	-1.188	0.0498602	0.0872582	-1.40864	-0.494301	0.373096	0.467744	-1.61743	-0.6937	0.240941	0.305328	-2.65367	-3.84616	-3.15924	-3.14985	-2.1575	-3.9919	-3.40188	-4.1447	-3.71753	-2.63496	-3.12522
-0.212926	0.258517	1.30748	0.0153938	0.892208	-0.485431	-2.02135	0.246104	ACTG1P15	chr15	34373541	34374603	-	1063	actin gamma 1 pseudogene 15				1.38473	0.469604	0.417666	0.51403	-1.38881	-0.473847	0.475317	0.567919	1.92312	0.943451	0.108947	0.151705	-3.39721	-2.94621	-3.88653	-3.54578	-3.24864	-2.58751	-3.40188	-2.84925	-3.71753	-4.68558	-3.25647
0.862925	-1.26393	-0.965147	0.147011	-1.21243	0.837855	1.15932	0.434407	ACTG1P17	chr15	82725873	82727431	-	2096	actin gamma 1 pseudogene 17				-1.27021	-0.345065	0.514535	0.605862	1.63433	0.708703	0.151548	0.219442	-2.07595	-1.05377	0.0262242	0.0420098	-2.48813	-2.8288	-1.76509	-1.72762	-3.24864	-3.03497	-2.23961	-3.21182	-1.74555	-1.51566	-2.03408
0.602674	0.841494	0.145012	-1.81408	0.244569	0.302427	-1.2596	0.9375	ACTG1P20	chr1	27325329	27325796	+	468	actin gamma 1 pseudogene 20				-1.561	-0.642469	0.124785	0.190282	-1.30195	-0.380676	0.359157	0.453634	-1.19897	-0.261793	0.523369	0.594412	-1.46204	-2.11236	-1.85793	-1.52692	-1.39717	-1.77558	-2.84	-1.72149	-1.69005	-2.53874	-1.345
0.747911	1.17981	0.575959	0.542815	0.461407	-1.42843	-0.981089	-1.09838	ACTG1P25	chr1	202861754	202861809	+	2321	actin gamma 1 pseudogene 25				-1.21971	-0.286535	0.0230784	0.0443837	-2.66669	-1.41505	2.88192e-09	1.77219e-08	2.18633	1.12851	6.82989e-08	2.66515e-07	2.14609	1.85509	0.72607	2.00233	2.28984	1.88786	1.8658	1.81161	0.553569	0.85136	0.77328
1.24442	-0.88342	-0.128931	-0.910961	-0.724605	0.534393	1.58264	-0.713536	ACTL10	chr20	33666943	33668525	+	1583	actin like 10		GO:0005869dynactincomplex		-1.09573	-0.131893	0.354709	0.450817	1.03019	0.0429124	0.764976	0.824422	-1.12881	-0.174805	0.18954	0.247746	1.80689	1.67039	1.85792	1.99582	1.61796	1.75195	1.61307	1.64617	1.86974	2.05589	1.64813
-2.14683	0.254382	-0.461308	0.0153623	0.126431	0.911667	0.191413	1.10888	ACTL11P	chr3	49873347	49877305	-	3959	actin like 11, pseudogene				2.6481	1.40496	0.212857	0.296379	7.49122	2.9052	0.0100646	0.0200733	-2.8289	-1.50024	0.0400188	0.0617825	-5.73923	-4.3023	-2.85834	-7.79371	-3.68474	-4.90944	-4.09376	-3.90369	-2.55999	-3.7925	-2.22252
1.12153	1.13632	0.520946	0.289999	0.372053	-1.10694	-1.10323	-1.23069	ACTL6A	chr3	179562886	179562973	+	3668	actin like 6A	GO:0001825blastocystformation//GO:0003407neuralretinadevelopment//GO:0006281DNArepair//GO:0006310DNArecombination//GO:0006338chromatinremodeling//GO:0006357regulationoftranscriptionbyRNApolymeraseII//GO:0007165signaltransduction//GO:0007399nervoussystemdevelopment//GO:0021510spinalcorddevelopment//GO:0040008regulationofgrowth//GO:0043967histoneH4acetylation//GO:0043968histoneH2Aacetylation//GO:00…	GO:0000785chromatin//GO:0005634nucleus//GO:0005654nucleoplasm//GO:0005886plasmamembrane//GO:0016514SWI/SNFcomplex//GO:0031011Ino80complex//GO:0032991protein-containingcomplex//GO:0035267NuA4histoneacetyltransferasecomplex//GO:0071564npBAFcomplex	GO:0003682chromatinbinding//GO:0003713transcriptioncoactivatoractivity//GO:0005515proteinbinding//GO:0031492nucleosomalDNAbinding	-1.19324	-0.25489	5.63335e-06	2.48721e-05	-1.73459	-0.794596	2.3706e-14	3.65369e-13	1.45368	0.539707	1.08219e-11	8.04814e-11	6.17276	5.9165	5.37884	6.17018	6.17534	5.96067	5.88011	5.90873	5.3928	5.39409	5.34963
1.96549	0.921642	-0.284403	-0.479525	-0.17783	-1.09587	0.0129899	-0.862494	ACTL8	chr1	17755333	17755504	+	1844	actin like 8	GO:0030855epithelialcelldifferentiation	GO:0005737cytoplasm//GO:0005869dynactincomplex	GO:0005515proteinbinding	-2.39818	-1.26194	6.88456e-05	0.000237406	-2.82716	-1.49935	3.20781e-05	0.000101803	1.17888	0.237416	0.446968	0.519968	0.375952	-0.881309	-1.12063	0.749322	0.00258129	-0.860194	-0.999779	-0.783954	-1.44069	-0.647446	-1.27375
-0.0964572	-0.214932	-1.19201	-1.16435	-0.647731	1.17272	1.26808	0.874678	ACTN1	chr14	68874128	68875017	-	14320	actinin alpha 1	GO:0007015actinfilamentorganization//GO:0030036actincytoskeletonorganization//GO:0030220plateletformation//GO:0036344plateletmorphogenesis//GO:0042981regulationofapoptoticprocess//GO:0045893positiveregulationoftranscription,DNA-templated//GO:0048041focaladhesionassembly//GO:0051017actinfilamentbundleassembly//GO:0051271negativeregulationofcellularcomponentmovement//GO:0051639actinfilamentnetworkf…	GO:0001725stressfiber//GO:0001726ruffle//GO:0005576extracellularregion//GO:0005615extracellularspace//GO:0005737cytoplasm//GO:0005829cytosol//GO:0005884actinfilament//GO:0005886plasmamembrane//GO:0005903brushborder//GO:0005911cell-celljunction//GO:0005916fasciaadherens//GO:0005925focaladhesion//GO:0030018Zdisc//GO:0030054celljunction//GO:0030864corticalactincytoskeleton//GO:0031093plateletalphagr…	GO:0003725double-strandedRNAbinding//GO:0005178integrinbinding//GO:0005509calciumionbinding//GO:0005515proteinbinding//GO:0017166vinculinbinding//GO:0030374nuclearreceptorcoactivatoractivity//GO:0042803proteinhomodimerizationactivity//GO:0044325transmembranetransporterbinding//GO:0051015actinfilamentbinding//GO:0099186structuralconstituentofpostsynapse	-1.10129	-0.139191	0.00129385	0.0033787	1.1525	0.204771	1.86835e-05	6.1741e-05	-1.26924	-0.343962	9.34782e-10	4.91338e-09	7.66275	7.52506	7.86805	7.6724	7.65311	7.49402	7.49852	7.58264	7.87905	7.89458	7.83052
-0.140805	-2.31507	0.948088	0.70649	0.372603	0.223138	0.183053	0.0225007	ACTN2	chr1	236664141	236664205	+	17976	actinin alpha 2	GO:0006936musclecontraction//GO:0007155celladhesion//GO:0030035microspikeassembly//GO:0030036actincytoskeletonorganization//GO:0042391regulationofmembranepotential//GO:0042981regulationofapoptoticprocess//GO:0043267negativeregulationofpotassiumiontransport//GO:0043268positiveregulationofpotassiumiontransport//GO:0045214sarcomereorganization//GO:0045893positiveregulationoftranscription,DNA-templat…	GO:0005576extracellularregion//GO:0005829cytosol//GO:0005856cytoskeleton//GO:0005884actinfilament//GO:0005886plasmamembrane//GO:0005925focaladhesion//GO:0030018Zdisc//GO:0030054celljunction//GO:0030175filopodium//GO:0030864corticalactincytoskeleton//GO:0031093plateletalphagranulelumen//GO:0031143pseudopodium//GO:0042995cellprojection//GO:0043197dendriticspine//GO:0070062extracellularexosome//GO:0…	GO:0005178integrinbinding//GO:0005509calciumionbinding//GO:0005515proteinbinding//GO:0005546phosphatidylinositol-4,5-bisphosphatebinding//GO:0008092cytoskeletalproteinbinding//GO:0008307structuralconstituentofmuscle//GO:0019904proteindomainspecificbinding//GO:0030274LIMdomainbinding//GO:0030374nuclearreceptorcoactivatoractivity//GO:0031432titinbinding//GO:0042802identicalproteinbinding//GO:004432…	12.1565	3.60365	0.00115083	0.00304362	5.83989	2.54594	0.0201031	0.0374215	2.08163	1.05771	0.0568998	0.0849118	-5.73923	-2.1793	-3.17571	-3.70625	-7.77221	-1.66997	-2.12177	-2.74615	-3.02566	-3.10062	-3.40086
-0.799983	-0.942989	-0.774272	-0.594685	-0.442001	1.14868	1.43737	0.96788	ACTN4	chr19	38647649	38647907	+	6125	actinin alpha 4	GO:0015031proteintransport//GO:0030036actincytoskeletonorganization//GO:0030050vesicletransportalongactinfilament//GO:0030335positiveregulationofcellmigration//GO:0032417positiveregulationofsodium:protonantiporteractivity//GO:0033209tumornecrosisfactor-mediatedsignalingpathway//GO:0035357peroxisomeproliferatoractivatedreceptorsignalingpathway//GO:0042981regulationofapoptoticprocess//GO:0045893pos…	GO:0001725stressfiber//GO:0005576extracellularregion//GO:0005615extracellularspace//GO:0005634nucleus//GO:0005737cytoplasm//GO:0005829cytosol//GO:0005886plasmamembrane//GO:0005925focaladhesion//GO:0015629actincytoskeleton//GO:0016604nuclearbody//GO:0030018Zdisc//GO:0030054celljunction//GO:0030864corticalactincytoskeleton//GO:0031093plateletalphagranulelumen//GO:0031143pseudopodium//GO:0032991prot…	GO:0000977RNApolymeraseIItranscriptionregulatoryregionsequence-specificDNAbinding//GO:0001882nucleosidebinding//GO:0003713transcriptioncoactivatoractivity//GO:0003723RNAbinding//GO:0003779actinbinding//GO:0005178integrinbinding//GO:0005509calciumionbinding//GO:0005515proteinbinding//GO:0016922nuclearreceptorbinding//GO:0030374nuclearreceptorcoactivatoractivity//GO:0031490chromatinDNAbinding//GO:0…	1.04344	0.0613493	0.098462	0.156035	1.39556	0.480846	3.53399e-12	3.65816e-11	-1.33746	-0.419497	4.91079e-12	3.88602e-11	8.80396	8.86667	9.28536	8.8207	8.78722	8.82672	8.86877	8.90451	9.27694	9.34453	9.23461
-1.25905	-1.23252	-0.0115293	0.0473077	-0.662078	1.20955	0.661629	1.24669	ACTR10	chr14	58200080	58200294	+	4039	actin related protein 10	GO:0007018microtubule-basedmovement//GO:0098958retrogradeaxonaltransportofmitochondrion	GO:0005576extracellularregion//GO:0005829cytosol//GO:0005869dynactincomplex//GO:0035578azurophilgranulelumen//GO:1904115axoncytoplasm//GO:1904813ficolin-1-richgranulelumen	GO:0005515proteinbinding	1.21001	0.275015	0.00019629	0.000612623	1.51243	0.596873	2.12835e-09	1.34109e-08	-1.24994	-0.321858	4.22319e-06	1.24709e-05	4.88989	5.16049	5.48615	4.88643	4.89335	5.21195	5.22731	5.0422	5.53058	5.3876	5.54027
-1.23235	-1.44889	1.05906	0.982233	0.742368	0.433363	0.186645	-0.722431	ACTR1A	chr10	102461881	102462060	-	4655	actin related protein 1A	GO:0007283spermatogenesis//GO:0016192vesicle-mediatedtransport	GO:0002177manchette//GO:0005737cytoplasm//GO:0005813centrosome//GO:0005814centriole//GO:0005829cytosol//GO:0005869dynactincomplex//GO:0005875microtubuleassociatedcomplex//GO:0015630microtubulecytoskeleton//GO:0030137COPI-coatedvesicle//GO:0070062extracellularexosome//GO:0099738cellcortexregion	GO:0005515proteinbinding//GO:0005524ATPbinding	1.25861	0.33183	1.76725e-07	1.10537e-06	1.13992	0.188929	0.000397008	0.00104853	1.10412	0.142901	0.00158754	0.00315367	6.85422	7.18527	7.04488	6.87002	6.83842	7.20441	7.1932	7.1582	7.1131	7.0771	6.94443
-0.0260639	-0.0278444	1.57398	1.16757	0.0789993	-0.337188	-1.00631	-1.42314	ACTR1B	chr2	97655939	97656960	-	2853	actin related protein 1B		GO:0005576extracellularregion//GO:0005737cytoplasm//GO:0005813centrosome//GO:0005829cytosol//GO:0005869dynactincomplex//GO:0015630microtubulecytoskeleton//GO:0016020membrane//GO:0034774secretorygranulelumen//GO:0070062extracellularexosome//GO:1904813ficolin-1-richgranulelumen	GO:0005515proteinbinding//GO:0005524ATPbinding	1.07487	0.104162	0.035527	0.0647791	-1.06795	-0.0948431	0.059539	0.097701	1.14791	0.199005	0.000114877	0.00027342	6.61247	6.71369	6.51877	6.61256	6.61238	6.78003	6.73749	6.62356	6.58	6.50997	6.46634
0.391506	-0.506936	-0.549116	-0.592726	-1.58799	0.632219	0.574205	1.63883	ACTR2	chr2	65227788	65227957	+	4041	actin related protein 2	GO:0007163establishmentormaintenanceofcellpolarity//GO:0008306associativelearning//GO:0008356asymmetriccelldivision//GO:0010592positiveregulationoflamellipodiumassembly//GO:0016344meioticchromosomemovementtowardsspindlepole//GO:0016482cytosolictransport//GO:0033206meioticcytokinesis//GO:0034314Arp2/3complex-mediatedactinnucleation//GO:0035902responsetoimmobilizationstress//GO:0035984cellularrespo…	GO:0005576extracellularregion//GO:0005634nucleus//GO:0005737cytoplasm//GO:0005829cytosol//GO:0005885Arp2/3proteincomplex//GO:0005925focaladhesion//GO:0014069postsynapticdensity//GO:0015629actincytoskeleton//GO:0016020membrane//GO:0030027lamellipodium//GO:0030478actincap//GO:0035578azurophilgranulelumen//GO:0035861siteofdouble-strandbreak//GO:0061825podosomecore//GO:0070062extracellularexosome//GO…	GO:0005200structuralconstituentofcytoskeleton//GO:0005515proteinbinding//GO:0005524ATPbinding//GO:0051015actinfilamentbinding	-1.05107	-0.0718527	0.0694718	0.115761	1.06225	0.0871256	0.0313711	0.0554928	-1.1165	-0.158978	0.000116108	0.000276065	8.65827	8.58509	8.74467	8.69684	8.61969	8.61607	8.61233	8.52686	8.71751	8.71253	8.80395
-1.13241	-1.78504	0.339929	0.420877	-0.332674	0.783342	0.681062	1.02492	ACTR3	chr2	113890063	113890323	+	11946	actin related protein 3	GO:0007163establishmentormaintenanceofcellpolarity//GO:0008356asymmetriccelldivision//GO:0010592positiveregulationoflamellipodiumassembly//GO:0016344meioticchromosomemovementtowardsspindlepole//GO:0033206meioticcytokinesis//GO:0034314Arp2/3complex-mediatedactinnucleation//GO:0045944positiveregulationoftranscriptionbyRNApolymeraseII//GO:0051653spindlelocalization//GO:0060271ciliumassembly//GO:0070…	GO:0005634nucleus//GO:0005737cytoplasm//GO:0005829cytosol//GO:0005885Arp2/3proteincomplex//GO:0005903brushborder//GO:0005911cell-celljunction//GO:0005925focaladhesion//GO:0015629actincytoskeleton//GO:0016020membrane//GO:0030027lamellipodium//GO:0035861siteofdouble-strandbreak//GO:0070062extracellularexosome	GO:0005200structuralconstituentofcytoskeleton//GO:0005515proteinbinding//GO:0005524ATPbinding//GO:0051015actinfilamentbinding	1.09769	0.134465	0.000985627	0.00264383	1.14165	0.191119	2.32715e-05	7.56406e-05	-1.04005	-0.0566543	0.0879851	0.125394	7.79397	7.92761	7.98494	7.8212	7.76674	7.94407	7.95082	7.88794	7.98107	7.97253	8.00123
-0.55764	-0.969295	-0.0718334	-1.13732	1.17789	-0.547344	1.57583	0.529709	ACTR3-AS1	chr2	113831049	113831428	-	1581	ACTR3 antisense RNA 1				1.28957	0.366888	0.41438	0.510915	1.59838	0.676614	0.140817	0.205942	-1.23947	-0.309726	0.40259	0.475803	-2.17307	-1.78057	-1.50441	-2.06579	-2.28035	-1.81258	-2.36793	-1.16119	-2.06042	-0.953777	-1.49904
0.977932	1.14166	-0.00444088	0.629434	0.657154	-1.18996	-1.26437	-0.947409	ACTR3B	chr7	152759749	152759926	+	6024	actin related protein 3B	GO:0008150biological_process	GO:0005737cytoplasm//GO:0005856cytoskeleton//GO:0042995cellprojection//GO:0070062extracellularexosome	GO:0003674molecular_function//GO:0005524ATPbinding//GO:0051015actinfilamentbinding	-1.10708	-0.146762	0.0312549	0.0579364	-1.40124	-0.486701	4.41369e-07	1.88876e-06	1.2657	0.339938	2.2358e-05	5.9226e-05	4.20358	4.06284	3.71538	4.18536	4.22179	3.96674	4.1078	4.11397	3.70291	3.68635	3.75689
1.36688	1.45893	-0.769385	-0.289542	0.497955	-1.11712	-0.867837	-0.27988	ACTR3C	chr7	150243916	150249054	-	6460	actin related protein 3C	GO:0008150biological_process	GO:0070062extracellularexosome	GO:0003674molecular_function//GO:0005524ATPbinding//GO:0051015actinfilamentbinding	-1.47558	-0.561285	0.00112859	0.00299006	-1.65431	-0.726232	0.000187291	0.000524743	1.12113	0.164948	0.30847	0.378565	1.44345	0.902272	0.710157	1.42788	1.45902	0.705273	0.867583	1.13396	0.58765	0.671971	0.870851
-0.124946	-0.151257	1.58487	0.978733	0.683778	-1.05143	-0.764898	-1.15484	ACTR5	chr20	38748460	38748853	+	2547	actin related protein 5	GO:0006302double-strandbreakrepair//GO:0006310DNArecombination//GO:0006338chromatinremodeling//GO:0006355regulationoftranscription,DNA-templated//GO:0070914UV-damageexcisionrepair	GO:0005634nucleus//GO:0005654nucleoplasm//GO:0005737cytoplasm//GO:0031011Ino80complex	GO:0005515proteinbinding	1.22008	0.286971	0.00149817	0.00384927	-1.14474	-0.195024	0.03489	0.0609805	1.39667	0.481995	2.08166e-06	6.43395e-06	3.25246	3.53034	3.05843	3.25546	3.24947	3.64473	3.50673	3.43958	3.04453	3.10976	3.02099
0.459351	0.772141	1.24795	0.705251	-0.641137	-0.318205	-1.87084	-0.354516	ACTR6	chr12	100199122	100199230	+	3813	actin related protein 6	GO:0043486histoneexchange	GO:0000812Swr1complex//GO:0005634nucleus//GO:0005737cytoplasm//GO:0005856cytoskeleton	GO:0005515proteinbinding//GO:0031491nucleosomebinding	-1.00933	-0.0133996	0.824448	0.869872	-1.11273	-0.154106	0.0206628	0.0383547	1.10245	0.140707	0.0190653	0.0314222	5.22546	5.20661	5.07077	5.20893	5.24199	5.29228	5.23492	5.09262	5.12675	4.96265	5.12291
-1.38354	-1.42516	0.0559087	-0.196166	-0.0198043	0.847159	0.911726	1.20988	ACTR8	chr3	53867066	53868862	-	4016	actin related protein 8	GO:0006302double-strandbreakrepair//GO:0006310DNArecombination//GO:0006338chromatinremodeling//GO:0006355regulationoftranscription,DNA-templated//GO:0007049cellcycle//GO:0051301celldivision	GO:0005634nucleus//GO:0005654nucleoplasm//GO:0005813centrosome//GO:0031011Ino80complex	GO:0005515proteinbinding//GO:0005524ATPbinding	1.16078	0.215093	0.000702176	0.00193989	1.30243	0.381202	6.29428e-07	2.63368e-06	-1.12203	-0.166109	0.0021956	0.00425851	4.45299	4.66754	4.83316	4.45629	4.44968	4.68489	4.64486	4.67286	4.81054	4.8208	4.86815
0.449504	-1.0935	-0.617771	0.910801	-0.745652	0.56231	1.5664	-1.03209	ACTRT3	chr3	169766921	169768350	-	1671	actin related protein T3		GO:0005634nucleus//GO:0005737cytoplasm//GO:0005856cytoskeleton		1.02034	0.0290533	0.864617	0.900757	1.08377	0.116058	0.509277	0.599579	-1.06216	-0.0870045	0.576563	0.644235	1.01641	1.04772	1.14221	1.15758	0.875253	0.962297	1.24198	0.938899	1.17822	1.36193	0.88649
-0.841016	-1.17858	1.17997	1.24493	1.09643	-0.56751	-0.446297	-0.487924	ACVR1	chr2	157736251	157737665	-	9842	activin A receptor type 1	GO:0000082G1/Stransitionofmitoticcellcycle//GO:0001569branchinginvolvedinbloodvesselmorphogenesis//GO:0001701inuteroembryonicdevelopment//GO:0001702gastrulationwithmouthformingsecond//GO:0001707mesodermformation//GO:0001755neuralcrestcellmigration//GO:0002526acuteinflammatoryresponse//GO:0003143embryonichearttubemorphogenesis//GO:0003181atrioventricularvalvemorphogenesis//GO:0003183mitralvalvemor…	GO:0005886plasmamembrane//GO:0005887integralcomponentofplasmamembrane//GO:0043235receptorcomplex//GO:0045177apicalpartofcell//GO:0048179activinreceptorcomplex//GO:0070724BMPreceptorcomplex	GO:0004672proteinkinaseactivity//GO:0004674proteinserine/threoninekinaseactivity//GO:0004675transmembranereceptorproteinserine/threoninekinaseactivity//GO:0005025transforminggrowthfactorbetareceptoractivity,typeI//GO:0005515proteinbinding//GO:0005524ATPbinding//GO:0016361activinreceptoractivity,typeI//GO:0017046peptidehormonebinding//GO:0042803proteinhomodimerizationactivity//GO:0045296cadherinbi…	1.80225	0.849797	1.57297e-13	5.56962e-12	1.14725	0.198184	0.00220278	0.00505794	1.57092	0.651613	2.9349e-12	2.41475e-11	4.62521	5.47461	4.82329	4.69086	4.55955	5.47702	5.50229	5.44452	4.79726	4.84441	4.82821
-1.59661	-1.61096	0.699179	0.614639	0.313873	0.331988	0.594982	0.652906	ACVR1B	chr12	51951699	51951834	+	5658	activin A receptor type 1B	GO:0000082G1/Stransitionofmitoticcellcycle//GO:0001701inuteroembryonicdevelopment//GO:0001942hairfollicledevelopment//GO:0006355regulationoftranscription,DNA-templated//GO:0006468proteinphosphorylation//GO:0007165signaltransduction//GO:0007178transmembranereceptorproteinserine/threoninekinasesignalingpathway//GO:0007399nervoussystemdevelopment//GO:0007417centralnervoussystemdevelopment//GO:001062…	GO:0005829cytosol//GO:0005886plasmamembrane//GO:0005887integralcomponentofplasmamembrane//GO:0009986cellsurface//GO:0043235receptorcomplex//GO:0048179activinreceptorcomplex	GO:0004674proteinserine/threoninekinaseactivity//GO:0004675transmembranereceptorproteinserine/threoninekinaseactivity//GO:0005515proteinbinding//GO:0005524ATPbinding//GO:0016361activinreceptoractivity,typeI//GO:0017002activin-activatedreceptoractivity//GO:0019838growthfactorbinding//GO:0031625ubiquitinproteinligasebinding//GO:0034711inhibinbinding//GO:0046332SMADbinding//GO:0046872metalionbinding…	1.26228	0.336036	2.57742e-07	1.54685e-06	1.25941	0.332745	4.03993e-07	1.74147e-06	1.00228	0.00329043	0.936215	0.949256	5.3902	5.72485	5.72237	5.39132	5.38908	5.74927	5.73609	5.6892	5.69202	5.73302	5.74206
0.087632	0.123485	1.06404	1.06258	0.949064	-0.981645	-1.46449	-0.840665	ACVR1C	chr2	157526767	157534043	-	9054	activin A receptor type 1C	GO:0001834trophectodermalcellproliferation//GO:0002021responsetodietaryexcess//GO:0006468proteinphosphorylation//GO:0007399nervoussystemdevelopment//GO:0009749responsetoglucose//GO:0019915lipidstorage//GO:0030154celldifferentiation//GO:0030262apoptoticnuclearchanges//GO:0032868responsetoinsulin//GO:0032924activinreceptorsignalingpathway//GO:0038092nodalsignalingpathway//GO:0043065positiveregulati…	GO:0005886plasmamembrane//GO:0043235receptorcomplex//GO:0048179activinreceptorcomplex	GO:0004674proteinserine/threoninekinaseactivity//GO:0005524ATPbinding//GO:0016361activinreceptoractivity,typeI//GO:0019838growthfactorbinding//GO:0038100nodalbinding//GO:0046872metalionbinding	1.67887	0.74749	5.72942e-05	0.00020098	-1.95249	-0.965314	6.55973e-05	0.000197723	3.27797	1.7128	1.16573e-09	6.0375e-09	0.809495	1.55283	-0.161352	0.795005	0.823984	1.5842	1.58302	1.49126	-0.0692463	-0.459513	0.0447019
-1.72427	-1.19668	0.852773	1.11448	0.73263	-0.0993786	0.04275	0.277701	ACVR2A	chr2	147844517	147844706	+	6448	activin A receptor type 2A	GO:0001702gastrulationwithmouthformingsecond//GO:0001934positiveregulationofproteinphosphorylation//GO:0006468proteinphosphorylation//GO:0007178transmembranereceptorproteinserine/threoninekinasesignalingpathway//GO:0007283spermatogenesis//GO:0007368determinationofleft/rightsymmetry//GO:0007498mesodermdevelopment//GO:0009952anterior/posteriorpatternspecification//GO:0010862positiveregulationofpath…	GO:0005737cytoplasm//GO:0005886plasmamembrane//GO:0005887integralcomponentofplasmamembrane//GO:0009986cellsurface//GO:0034673inhibin-betaglycan-ActRIIcomplex//GO:0043235receptorcomplex//GO:0048179activinreceptorcomplex	GO:0004674proteinserine/threoninekinaseactivity//GO:0004675transmembranereceptorproteinserine/threoninekinaseactivity//GO:0005515proteinbinding//GO:0005524ATPbinding//GO:0015026coreceptoractivity//GO:0017002activin-activatedreceptoractivity//GO:0019838growthfactorbinding//GO:0030165PDZdomainbinding//GO:0034711inhibinbinding//GO:0043621proteinself-association//GO:0046872metalionbinding//GO:0048185…	1.34205	0.424439	3.11357e-08	2.35594e-07	1.21144	0.276728	2.84649e-05	9.12816e-05	1.10781	0.147711	0.00354694	0.00665866	4.97626	5.40015	5.25177	4.92888	5.02363	5.39168	5.43868	5.3701	5.22069	5.24621	5.2884
0.243697	0.876204	0.926704	0.627797	0.566742	-1.84412	-1.03179	-0.365231	ACVR2B	chr3	38453890	38454374	+	15705	activin A receptor type 2B	GO:0000122negativeregulationoftranscriptionbyRNApolymeraseII//GO:0001946lymphangiogenesis//GO:0001974bloodvesselremodeling//GO:0006355regulationoftranscription,DNA-templated//GO:0006468proteinphosphorylation//GO:0007165signaltransduction//GO:0007178transmembranereceptorproteinserine/threoninekinasesignalingpathway//GO:0009952anterior/posteriorpatternspecification//GO:0030501positiveregulationofbo…	GO:0005737cytoplasm//GO:0005886plasmamembrane//GO:0005887integralcomponentofplasmamembrane//GO:0032991protein-containingcomplex//GO:0043235receptorcomplex//GO:0048179activinreceptorcomplex	GO:0004674proteinserine/threoninekinaseactivity//GO:0005515proteinbinding//GO:0005524ATPbinding//GO:0016362activinreceptoractivity,typeII//GO:0017002activin-activatedreceptoractivity//GO:0019838growthfactorbinding//GO:0046872metalionbinding//GO:0048185activinbinding	1.02587	0.0368526	0.60191	0.684684	-1.29138	-0.368909	6.12253e-05	0.000185566	1.32479	0.405762	4.59398e-06	1.34982e-05	4.67131	4.70501	4.29562	4.59888	4.74374	4.75531	4.68685	4.67286	4.1207	4.30675	4.45941
0.957686	1.22288	-1.62	-0.952611	0.834047	-0.100938	-0.552326	0.211262	ACVR2B-AS1	chr3	38451027	38453225	-	2517	ACVR2B antisense RNA 1				-1.38179	-0.466535	0.00994589	0.0210496	-1.2491	-0.32089	0.0726279	0.116306	-1.10623	-0.145645	0.381327	0.45439	1.29899	0.861889	0.975022	1.26428	1.3337	0.589523	0.764225	1.23192	0.987167	0.869008	1.06889
0.271922	0.280178	-0.834626	-1.15224	-1.40752	1.02396	1.17427	0.644054	ACY1	chr3	51983340	51983589	+	4727	aminoacylase 1	GO:0006520cellularaminoacidmetabolicprocess	GO:0005829cytosol//GO:0070062extracellularexosome	GO:0004046aminoacylaseactivity//GO:0005515proteinbinding//GO:0042802identicalproteinbinding//GO:0046872metalionbinding	-1.55502	-0.636935	9.79975e-07	5.15564e-06	1.23554	0.30514	0.00210315	0.00484856	-1.92129	-0.942075	2.25258e-10	1.3185e-09	3.26686	2.61734	3.57669	3.26496	3.26877	2.75432	2.60775	2.48994	3.612	3.68137	3.43669
0.639839	0.294932	-1.23328	-1.07587	-1.20109	0.938515	1.10302	0.533935	ACY3	chr11	67642555	67642939	-	1371	aminoacylase 3	GO:0008150biological_process	GO:0005829cytosol//GO:0016324apicalplasmamembrane//GO:0070062extracellularexosome	GO:0003674molecular_function//GO:0004046aminoacylaseactivity//GO:0005515proteinbinding//GO:0016788hydrolaseactivity,actingonesterbonds//GO:0016811hydrolaseactivity,actingoncarbon-nitrogen(butnotpeptide)bonds,inlinearamides//GO:0042802identicalproteinbinding//GO:0046872metalionbinding	-1.85897	-0.894501	3.54365e-09	3.40867e-08	1.15426	0.206974	0.0242967	0.0442668	-2.14574	-1.10148	1.55698e-11	1.12514e-10	3.62157	2.72905	3.83475	3.71557	3.52757	2.6946	2.7804	2.71215	3.87837	3.96803	3.65785
0.931053	1.16372	0.46913	0.541367	0.350862	-1.2161	-1.39828	-0.841748	ACYP1	chr14	75053237	75053659	-	1803	acylphosphatase 1	GO:0006796phosphate-containingcompoundmetabolicprocess		GO:0003998acylphosphataseactivity	-1.18282	-0.242229	0.00324577	0.00770296	-1.86644	-0.900288	3.58088e-10	2.55079e-09	1.57796	0.65806	3.24652e-08	1.33295e-07	3.70691	3.46266	2.80191	3.65905	3.75478	3.46898	3.4987	3.42031	2.77555	2.70059	2.92959
-1.56097	-1.56471	0.758168	1.03218	0.383575	0.43503	0.308088	0.208649	ACYP2	chr2	53970838	53971321	+	4964	acylphosphatase 2	GO:0006796phosphate-containingcompoundmetabolicprocess		GO:0003998acylphosphataseactivity//GO:0005515proteinbinding//GO:0042802identicalproteinbinding	1.85745	0.893326	3.21201e-09	3.12895e-08	1.65644	0.728082	2.05906e-07	9.34384e-07	1.12136	0.165243	0.0399206	0.0616515	2.51277	3.40097	3.24279	2.51349	2.51204	3.41399	3.52039	3.26854	3.28852	3.23923	3.20062
-0.385155	-0.57384	2.27103	0.256872	0.292385	-0.616464	-0.451389	-0.793438	ADA	chr20	44584896	44585664	-	12177	adenosine deaminase	GO:0000255allantoinmetabolicprocess//GO:0001666responsetohypoxia//GO:0001821histaminesecretion//GO:0001829trophectodermalcelldifferentiation//GO:0001889liverdevelopment//GO:0001890placentadevelopment//GO:0002314germinalcenterBcelldifferentiation//GO:0002636positiveregulationofgerminalcenterformation//GO:0002686negativeregulationofleukocytemigration//GO:0002906negativeregulationofmatureBcellapopto…	GO:0005615extracellularspace//GO:0005764lysosome//GO:0005829cytosol//GO:0005886plasmamembrane//GO:0009897externalsideofplasmamembrane//GO:0009986cellsurface//GO:0016020membrane//GO:0030054celljunction//GO:0032839dendritecytoplasm//GO:0043025neuronalcellbody//GO:0060205cytoplasmicvesiclelumen	GO:0001883purinenucleosidebinding//GO:0004000adenosinedeaminaseactivity//GO:0005515proteinbinding//GO:0008270zincionbinding//GO:00469362'-deoxyadenosinedeaminaseactivity	1.1093	0.149646	0.0399428	0.0718183	-1.01017	-0.0146004	0.840877	0.880426	1.12058	0.164246	0.0166828	0.0278248	4.02144	4.16312	4.00737	4.03085	4.01202	4.29595	4.09493	4.09847	4.00777	4.02424	3.9901
-0.617479	-2.22297	0.438762	0.212021	0.192397	0.637341	0.490561	0.869366	ADA2	chr22	17178790	17181576	-	11032	adenosine deaminase 2	GO:0006154adenosinecatabolicprocess//GO:0007165signaltransduction//GO:0007275multicellularorganismdevelopment//GO:0046103inosinebiosyntheticprocess	GO:0005576extracellularregion//GO:0005615extracellularspace//GO:0035578azurophilgranulelumen	GO:0004000adenosinedeaminaseactivity//GO:0008083growthfactoractivity//GO:0008201heparinbinding//GO:0008270zincionbinding//GO:0031685adenosinereceptorbinding//GO:0042803proteinhomodimerizationactivity//GO:0043394proteoglycanbinding	5.46792	2.45099	0.00129353	0.00337827	7.96376	2.99345	0.000158795	0.000450563	-1.45645	-0.542457	0.125371	0.172022	-4.30007	-1.86238	-1.31117	-3.14985	-5.45028	-1.63642	-1.96131	-1.98942	-1.35189	-1.5622	-1.01943
1.22565	1.84368	-0.539103	-0.40325	-0.367325	-1.14515	-0.235587	-0.378912	ADAL	chr15	43330672	43330859	+	5734	adenosine deaminase like	GO:0006154adenosinecatabolicprocess//GO:0009117nucleotidemetabolicprocess//GO:0046103inosinebiosyntheticprocess	GO:0005829cytosol	GO:0004000adenosinedeaminaseactivity//GO:0046872metalionbinding//GO:0062154N6-mAMPdeaminaseactivity	-1.35734	-0.440781	2.31198e-05	8.90386e-05	-1.38424	-0.469098	1.94321e-05	6.40581e-05	1.01982	0.0283164	0.736077	0.783068	3.35798	2.91862	2.88519	3.2891	3.42685	2.89577	2.92605	2.93406	2.76069	2.96342	2.93147
-0.949361	-1.02534	1.2039	1.37541	0.811068	-0.615243	-0.818265	0.0178283	ADAM10	chr15	58588809	58597641	-	15979	ADAM metallopeptidase domain 10	GO:0001701inuteroembryonicdevelopment//GO:0006468proteinphosphorylation//GO:0006509membraneproteinectodomainproteolysis//GO:0007162negativeregulationofcelladhesion//GO:0007219Notchsignalingpathway//GO:0007229integrin-mediatedsignalingpathway//GO:0007267cell-cellsignaling//GO:0007283spermatogenesis//GO:0008284positiveregulationofcellpopulationproliferation//GO:0008593regulationofNotchsignalingpath…	GO:0000139Golgimembrane//GO:0005634nucleus//GO:0005737cytoplasm//GO:0005788endoplasmicreticulumlumen//GO:0005794Golgiapparatus//GO:0005798Golgi-associatedvesicle//GO:0005802trans-Golginetwork//GO:0005886plasmamembrane//GO:0005912adherensjunction//GO:0005925focaladhesion//GO:0008021synapticvesicle//GO:0009986cellsurface//GO:0014069postsynapticdensity//GO:0016020membrane//GO:0016021integralcomponen…	GO:0004175endopeptidaseactivity//GO:0004222metalloendopeptidaseactivity//GO:0005102signalingreceptorbinding//GO:0005178integrinbinding//GO:0005515proteinbinding//GO:0008237metallopeptidaseactivity//GO:0017124SH3domainbinding//GO:0019901proteinkinasebinding//GO:0042803proteinhomodimerizationactivity//GO:0046872metalionbinding//GO:1902945metalloendopeptidaseactivityinvolvedinamyloidprecursorprotein…	1.19518	0.257227	3.20214e-07	1.87478e-06	1.04479	0.0632145	0.0971471	0.149315	1.14394	0.194012	4.5755e-06	1.34525e-05	8.2467	8.50324	8.30915	8.2513	8.2421	8.51217	8.53295	8.46458	8.29178	8.26719	8.36848
0.383404	0.210093	0.925143	0.947725	0.987664	-1.04966	-0.993589	-1.41078	ADAM11	chr17	44758988	44759260	+	4813	ADAM metallopeptidase domain 11	GO:0006508proteolysis//GO:0007229integrin-mediatedsignalingpathway	GO:0005886plasmamembrane//GO:0016021integralcomponentofmembrane//GO:0062023collagen-containingextracellularmatrix	GO:0004222metalloendopeptidaseactivity//GO:0005178integrinbinding//GO:0008237metallopeptidaseactivity	1.79419	0.843331	9.47357e-06	3.9718e-05	-3.68977	-1.88353	5.15863e-08	2.57037e-07	6.62015	2.72686	1.03163e-11	7.72463e-11	0.859296	1.70713	-1.01009	0.971162	0.74743	1.67051	1.69966	1.75122	-0.878816	-0.806436	-1.345
1.30408	1.15781	0.32163	0.167166	0.29192	-0.824445	-0.945654	-1.47251	ADAM15	chr1	155050566	155050922	+	6584	ADAM metallopeptidase domain 15	GO:0001525angiogenesis//GO:0001953negativeregulationofcell-matrixadhesion//GO:0002418immuneresponsetotumorcell//GO:0006508proteolysis//GO:0007160cell-matrixadhesion//GO:0007229integrin-mediatedsignalingpathway//GO:0008584malegonaddevelopment//GO:0022617extracellularmatrixdisassembly//GO:0030308negativeregulationofcellgrowth//GO:0030336negativeregulationofcellmigration//GO:0030574collagencatabolic…	GO:0001669acrosomalvesicle//GO:0005615extracellularspace//GO:0005886plasmamembrane//GO:0005912adherensjunction//GO:0009986cellsurface//GO:0016021integralcomponentofmembrane//GO:0031514motilecilium//GO:0070062extracellularexosome	GO:0004222metalloendopeptidaseactivity//GO:0005178integrinbinding//GO:0005515proteinbinding//GO:0008237metallopeptidaseactivity//GO:0017124SH3domainbinding//GO:0046872metalionbinding	-1.13724	-0.185543	4.52003e-05	0.000162602	-1.3598	-0.443392	5.62983e-11	4.63041e-10	1.1957	0.25785	1.52797e-07	5.61357e-07	8.22729	8.04162	7.78509	8.24128	8.2133	8.05336	8.02381	8.04768	7.83414	7.81095	7.71018
-0.46907	-0.878102	1.35273	1.30983	0.89507	-0.88062	-0.700499	-0.629332	ADAM17	chr2	9488486	9490518	-	15964	ADAM metallopeptidase domain 17	GO:0001666responsetohypoxia//GO:0001934positiveregulationofproteinphosphorylation//GO:0002446neutrophilmediatedimmunity//GO:0002467germinalcenterformation//GO:0002690positiveregulationofleukocytechemotaxis//GO:0006508proteolysis//GO:0006509membraneproteinectodomainproteolysis//GO:0007155celladhesion//GO:0007173epidermalgrowthfactorreceptorsignalingpathway//GO:0007219Notchsignalingpathway//GO:0007…	GO:0000139Golgimembrane//GO:0005737cytoplasm//GO:0005788endoplasmicreticulumlumen//GO:0005829cytosol//GO:0005886plasmamembrane//GO:0005887integralcomponentofplasmamembrane//GO:0005911cell-celljunction//GO:0005925focaladhesion//GO:0009986cellsurface//GO:0015629actincytoskeleton//GO:0016020membrane//GO:0016324apicalplasmamembrane//GO:0032587rufflemembrane//GO:0045121membraneraft	GO:0004175endopeptidaseactivity//GO:0004222metalloendopeptidaseactivity//GO:0005112Notchbinding//GO:0005138interleukin-6receptorbinding//GO:0005178integrinbinding//GO:0005515proteinbinding//GO:0008233peptidaseactivity//GO:0008237metallopeptidaseactivity//GO:0017124SH3domainbinding//GO:0030165PDZdomainbinding//GO:0046872metalionbinding//GO:1902945metalloendopeptidaseactivityinvolvedinamyloidprecur…	1.36841	0.4525	2.6824e-08	2.06504e-07	-1.01013	-0.0145352	0.801875	0.853304	1.38227	0.467035	3.34147e-09	1.6024e-08	4.84309	5.29297	4.82779	4.89257	4.79361	5.33334	5.32296	5.22261	4.793	4.83658	4.8538
-0.986898	-1.03059	1.1391	1.12893	1.24819	-0.265251	-0.654134	-0.579352	ADAM19	chr5	157395534	157395679	-	7704	ADAM metallopeptidase domain 19	GO:0001890placentadevelopment//GO:0006509membraneproteinectodomainproteolysis//GO:0010628positiveregulationofgeneexpression//GO:0016485proteinprocessing//GO:0042987amyloidprecursorproteincatabolicprocess//GO:2000049positiveregulationofcell-celladhesionmediatedbycadherin	GO:0005634nucleus//GO:0005794Golgiapparatus//GO:0005886plasmamembrane//GO:0016021integralcomponentofmembrane//GO:0062023collagen-containingextracellularmatrix	GO:0004222metalloendopeptidaseactivity//GO:0005515proteinbinding//GO:0017124SH3domainbinding//GO:0046872metalionbinding//GO:1902945metalloendopeptidaseactivityinvolvedinamyloidprecursorproteincatabolicprocess	9.52952	3.2524	8.17358e-13	2.31513e-11	1.6838	0.751725	0.00846828	0.0171545	5.65952	2.50068	2.76718e-13	2.81745e-12	-0.728328	2.53121	0.0326892	-0.695677	-0.760979	2.48193	2.46672	2.64498	0.382925	-0.198315	-0.0865426
-0.109034	0.0901015	0.258464	-2.22762	-0.158487	0.773638	1.12509	0.247846	ADAM20P1	chr14	70453541	70453978	-	3733	ADAM metallopeptidase domain 20 pseudogene 1				-1.43074	-0.516765	0.338058	0.433296	1.46885	0.554687	0.257906	0.345116	-2.10155	-1.07145	0.0296638	0.047025	-2.35826	-2.90574	-1.79102	-2.43616	-2.28035	-2.14862	-4.09376	-2.47485	-1.74555	-1.47057	-2.15693
-1.69602	-1.46847	0.682399	0.713293	0.236948	0.283573	0.820336	0.427945	ADAM20P3	chr4	187746094	187748199	-	2106	ADAM metallopeptidase domain 20 pseudogene 3				2.19048	1.13125	0.000443027	0.00128189	2.14886	1.10357	0.000734144	0.00185432	1.01937	0.0276752	0.891882	0.913019	-1.32436	-0.203813	-0.221516	-1.38432	-1.26441	-0.130995	-0.114715	-0.365728	-0.341159	-0.0583079	-0.265081
0.675281	1.68374	0.00139354	-0.488609	-0.192824	0.470026	-0.402536	-1.74647	ADAM21	chr14	70417107	70417188	+	3251	ADAM metallopeptidase domain 21	GO:0006508proteolysis//GO:0007338singlefertilization//GO:0008584malegonaddevelopment	GO:0005886plasmamembrane//GO:0009897externalsideofplasmamembrane//GO:0016021integralcomponentofmembrane//GO:0030424axon//GO:0043025neuronalcellbody//GO:1990913spermheadplasmamembrane	GO:0004222metalloendopeptidaseactivity//GO:0005515proteinbinding//GO:0008237metallopeptidaseactivity//GO:0046872metalionbinding	-1.40963	-0.495314	0.00797631	0.0173018	-1.5555	-0.637377	0.00194061	0.00450912	1.10348	0.142063	0.42741	0.500401	1.51779	1.0168	0.898168	1.33815	1.69744	1.09806	0.923481	1.02886	1.26502	0.954147	0.475336
0.695076	0.00183032	-0.396261	0.971964	0.219662	-1.8273	-0.8254	1.16042	ADAM21P1	chr14	70245491	70247660	-	2311	ADAM metallopeptidase domain 21 pseudogene 1				-1.06618	-0.0924532	0.8864	0.916595	-1.52539	-0.60918	0.400509	0.495655	1.43071	0.516727	0.435917	0.509065	-3.4173	-3.48159	-4.06995	-3.14985	-3.68474	-3.9919	-2.93621	-3.51667	-5.09605	-4.32301	-2.7908
-0.339963	-0.297359	1.19324	1.23091	1.06167	-0.823186	-0.987234	-1.03808	ADAM22	chr7	87934143	87934550	+	13668	ADAM metallopeptidase domain 22	GO:0006508proteolysis//GO:0007155celladhesion//GO:0007162negativeregulationofcelladhesion//GO:0007417centralnervoussystemdevelopment//GO:0008344adultlocomotorybehavior//GO:0022011myelinationinperipheralnervoussystem//GO:0099645neurotransmitterreceptorlocalizationtopostsynapticspecializationmembrane	GO:0005886plasmamembrane//GO:0016021integralcomponentofmembrane//GO:0030424axon//GO:0098978glutamatergicsynapse//GO:0099061integralcomponentofpostsynapticdensitymembrane	GO:0004222metalloendopeptidaseactivity//GO:0005178integrinbinding//GO:0005515proteinbinding	3.49208	1.80409	2.11983e-09	2.14314e-08	-1.70717	-0.77161	0.00604101	0.0126721	5.96159	2.5757	1.72747e-11	1.23667e-10	-0.205608	1.59173	-0.971398	-0.231467	-0.179749	1.62972	1.67545	1.47001	-0.818062	-1.0172	-1.07893
-0.681063	-0.562672	1.13471	1.21127	1.07724	-0.354328	-0.406015	-1.41914	ADAM23	chr2	206443532	206444080	+	6425	ADAM metallopeptidase domain 23	GO:0006508proteolysis//GO:0007155celladhesion//GO:0007417centralnervoussystemdevelopment//GO:1990830cellularresponsetoleukemiainhibitoryfactor	GO:0005576extracellularregion//GO:0005886plasmamembrane//GO:0005887integralcomponentofplasmamembrane//GO:0098978glutamatergicsynapse//GO:0099056integralcomponentofpresynapticmembrane	GO:0004222metalloendopeptidaseactivity//GO:0005178integrinbinding//GO:0005515proteinbinding//GO:0008237metallopeptidaseactivity	23.1208	4.53112	2.24142e-09	2.25417e-08	-1.26104	-0.334616	0.60373	0.686818	29.1562	4.86573	2.6234e-10	1.51662e-09	-2.4323	2.09305	-2.70088	-2.58426	-2.28035	2.07672	2.27324	1.9292	-1.74555	-1.87823	-4.47886
-1.7628	-1.35058	0.468717	0.363801	1.0191	0.526874	0.112279	0.622615	ADAM28	chr8	24294069	24294195	+	9381	ADAM metallopeptidase domain 28	GO:0006508proteolysis//GO:0007283spermatogenesis	GO:0005576extracellularregion//GO:0005739mitochondrion//GO:0005886plasmamembrane//GO:0016021integralcomponentofmembrane	GO:0004175endopeptidaseactivity//GO:0004222metalloendopeptidaseactivity//GO:0005515proteinbinding//GO:0008237metallopeptidaseactivity//GO:0046872metalionbinding	1.98881	0.991903	0.000496495	0.00142138	1.88477	0.914386	0.00147361	0.00350373	1.0552	0.0775166	0.681504	0.736432	-0.878526	0.123508	0.0328806	-0.97353	-0.783521	0.0550643	0.00670463	0.308756	0.0818715	-0.109232	0.126002
-1.42283	-0.385534	0.778694	-1.10312	-0.114063	0.645303	-0.00290219	1.60445	ADAM32	chr8	39106990	39107199	+	10050	ADAM metallopeptidase domain 32	GO:0006508proteolysis//GO:0007155celladhesion//GO:0007339bindingofspermtozonapellucida	GO:0016021integralcomponentofmembrane	GO:0004222metalloendopeptidaseactivity//GO:0005515proteinbinding	1.23729	0.307182	0.372416	0.468836	1.55003	0.632294	0.0736384	0.117703	-1.25276	-0.325113	0.259939	0.326362	-1.49083	-1.20677	-0.87134	-1.68518	-1.29647	-0.860194	-1.56538	-1.19474	-0.91018	-1.15309	-0.550753
-0.965185	-1.7953	1.04224	0.707732	1.10512	-0.0542922	0.108547	-0.14886	ADAM8	chr10	133262420	133263233	-	4763	ADAM metallopeptidase domain 8	GO:0000902cellmorphogenesis//GO:0001525angiogenesis//GO:0002523leukocytemigrationinvolvedininflammatoryresponse//GO:0002675positiveregulationofacuteinflammatoryresponse//GO:0002693positiveregulationofcellularextravasation//GO:0006508proteolysis//GO:0006954inflammatoryresponse//GO:0010954positiveregulationofproteinprocessing//GO:0022407regulationofcell-celladhesion//GO:0022617extracellularmatrixdi…	GO:0002102podosome//GO:0005737cytoplasm//GO:0005886plasmamembrane//GO:0005887integralcomponentofplasmamembrane//GO:0009986cellsurface//GO:0032010phagolysosome//GO:0032127densecoregranulemembrane//GO:0035579specificgranulemembrane//GO:0042581specificgranule//GO:0070820tertiarygranule//GO:0070821tertiarygranulemembrane//GO:0071133alpha9-beta1integrin-ADAM8complex//GO:0101003ficolin-1-richgranulemem…	GO:0004222metalloendopeptidaseactivity//GO:0004252serine-typeendopeptidaseactivity//GO:0005509calciumionbinding//GO:0005515proteinbinding//GO:0008237metallopeptidaseactivity//GO:0008270zincionbinding//GO:0043621proteinself-association//GO:0050839celladhesionmoleculebinding	1.87662	0.908135	4.6177e-06	2.08109e-05	1.43735	0.523416	0.00368365	0.00809354	1.30561	0.38472	0.00544279	0.00991246	0.768989	1.67813	1.2948	0.930804	0.607173	1.71343	1.58302	1.73794	1.28593	1.34941	1.24906
-0.473198	-0.738548	1.06951	1.40926	1.10038	-0.839973	-0.858202	-0.669229	ADAM9	chr8	38996754	38997160	+	17704	ADAM metallopeptidase domain 9	GO:0006509membraneproteinectodomainproteolysis//GO:0007155celladhesion//GO:0007160cell-matrixadhesion//GO:0007179transforminggrowthfactorbetareceptorsignalingpathway//GO:0007229integrin-mediatedsignalingpathway//GO:0010042responsetomanganeseion//GO:0016477cellmigration//GO:0030216keratinocytedifferentiation//GO:0030335positiveregulationofcellmigration//GO:0031293membraneproteinintracellulardomain…	GO:0005615extracellularspace//GO:0005925focaladhesion//GO:0009986cellsurface//GO:0016021integralcomponentofmembrane//GO:0016323basolateralplasmamembrane//GO:0031233intrinsiccomponentofexternalsideofplasmamembrane//GO:0070062extracellularexosome	GO:0004222metalloendopeptidaseactivity//GO:0005080proteinkinaseCbinding//GO:0005178integrinbinding//GO:0005515proteinbinding//GO:0005518collagenbinding//GO:0008237metallopeptidaseactivity//GO:0017124SH3domainbinding//GO:0043236lamininbinding//GO:0046872metalionbinding	1.17316	0.230394	5.10691e-07	2.85957e-06	-1.01629	-0.0233185	0.497093	0.587916	1.19227	0.253713	2.14962e-08	9.06723e-08	8.1309	8.36151	8.10741	8.14791	8.1139	8.34567	8.38923	8.34963	8.10089	8.09856	8.12278
-1.12583	-1.12023	1.10579	1.0097	1.08406	-1.02791	0.0177978	0.0566306	ADAMTS1	chr21	26835755	26838278	-	7303	ADAM metallopeptidase with thrombospondin type 1 motif 1	GO:0001542ovulationfromovarianfollicle//GO:0001822kidneydevelopment//GO:0006508proteolysis//GO:0007229integrin-mediatedsignalingpathway//GO:0008285negativeregulationofcellpopulationproliferation//GO:0016525negativeregulationofangiogenesis//GO:0030198extracellularmatrixorganization//GO:0060347hearttrabeculaformation//GO:1900087positiveregulationofG1/Stransitionofmitoticcellcycle//GO:1904707positiv…	GO:0005576extracellularregion//GO:0005604basementmembrane//GO:0031012extracellularmatrix//GO:0031410cytoplasmicvesicle//GO:0062023collagen-containingextracellularmatrix	GO:0004222metalloendopeptidaseactivity//GO:0005515proteinbinding//GO:0008201heparinbinding//GO:0008237metallopeptidaseactivity//GO:0008270zincionbinding	339.75	8.40833	4.55908e-07	2.58175e-06	8.90351	3.15437	0.0308541	0.054692	38.1591	5.25396	1.43314e-07	5.29081e-07	-7.78296	0.618569	-4.69331	-7.79371	-7.77221	0.769261	0.400562	0.685886	-7.41797	-3.40547	-3.25647
-1.90997	-1.13097	0.75655	0.347941	0.682947	-0.091388	0.685425	0.659469	ADAMTS13	chr9	133414358	133414644	+	5708	ADAM metallopeptidase with thrombospondin type 1 motif 13	GO:0006508proteolysis//GO:0007160cell-matrixadhesion//GO:0007229integrin-mediatedsignalingpathway//GO:0009100glycoproteinmetabolicprocess//GO:0009636responsetotoxicsubstance//GO:0014075responsetoamine//GO:0016485proteinprocessing//GO:0030168plateletactivation//GO:0030198extracellularmatrixorganization//GO:0035864responsetopotassiumion//GO:0043171peptidecatabolicprocess//GO:0071222cellularresponse…	GO:0005615extracellularspace//GO:0005788endoplasmicreticulumlumen//GO:0009986cellsurface//GO:0031012extracellularmatrix	GO:0004222metalloendopeptidaseactivity//GO:0005178integrinbinding//GO:0005509calciumionbinding//GO:0005515proteinbinding//GO:0008237metallopeptidaseactivity//GO:0008270zincionbinding	1.84028	0.879927	1.18511e-07	7.74131e-07	1.75287	0.809717	7.44265e-07	3.07889e-06	1.04987	0.0702098	0.448212	0.521277	2.35768	3.234	3.1603	2.19639	2.51896	3.30056	3.13136	3.27008	2.94944	3.27111	3.26036
-0.747503	-1.5989	1.34579	0.799618	1.05997	-0.493334	-0.167666	-0.197983	ADAMTS14	chr10	70672506	70672884	+	5566	ADAM metallopeptidase with thrombospondin type 1 motif 14	GO:0006508proteolysis//GO:0030198extracellularmatrixorganization//GO:0030199collagenfibrilorganization//GO:0030574collagencatabolicprocess	GO:0005576extracellularregion//GO:0031012extracellularmatrix	GO:0004222metalloendopeptidaseactivity//GO:0046872metalionbinding	10.1067	3.33724	3.43594e-05	0.000127167	2.48901	1.31557	0.083756	0.131649	4.06052	2.02166	0.000104662	0.000250943	-4.33555	-1.02173	-3.0245	-3.70625	-4.96485	-0.611756	-1.41916	-1.03428	-3.33051	-2.84908	-2.8939
1.02732	1.07218	0.608763	0.456197	0.324468	-1.33741	-1.01288	-1.13862	ADAMTS15	chr11	130448645	130449930	+	6006	ADAM metallopeptidase with thrombospondin type 1 motif 15	GO:0006508proteolysis//GO:0007520myoblastfusion//GO:0022617extracellularmatrixdisassembly//GO:0030198extracellularmatrixorganization	GO:0005615extracellularspace//GO:0009986cellsurface//GO:0031012extracellularmatrix//GO:0062023collagen-containingextracellularmatrix	GO:0004175endopeptidaseactivity//GO:0004222metalloendopeptidaseactivity//GO:0008201heparinbinding//GO:0008270zincionbinding//GO:0050840extracellularmatrixbinding	-1.50919	-0.593778	1.19987e-08	1.00485e-07	-4.83739	-2.27423	1.36532e-17	4.18335e-16	3.20528	1.68045	4.60798e-15	6.84495e-14	5.19534	4.59152	2.91767	5.17226	5.21843	4.74142	4.58437	4.44877	2.73811	3.07217	2.94274
-0.488298	-0.0706893	0.626658	1.21356	1.50931	-1.02894	-0.843359	-0.918242	ADAMTS17	chr15	99971437	99974562	-	8390	ADAM metallopeptidase with thrombospondin type 1 motif 17	GO:0006508proteolysis//GO:0030198extracellularmatrixorganization	GO:0005576extracellularregion//GO:0031012extracellularmatrix	GO:0004222metalloendopeptidaseactivity//GO:0046872metalionbinding	1.17933	0.237963	0.00317519	0.00755418	-1.08173	-0.113338	0.15758	0.226919	1.27571	0.351301	3.33886e-05	8.61327e-05	3.51487	3.75915	3.40101	3.47834	3.55141	3.67344	3.77613	3.82789	3.38373	3.41621	3.4031
-0.364777	-0.17956	1.13284	1.01141	1.23307	-1.37658	-0.890071	-0.566336	ADAMTS19	chr5	129460281	129460482	+	5392	ADAM metallopeptidase with thrombospondin type 1 motif 19	GO:0006508proteolysis//GO:0030198extracellularmatrixorganization	GO:0005576extracellularregion//GO:0031012extracellularmatrix	GO:0004222metalloendopeptidaseactivity//GO:0046872metalionbinding	2.72652	1.44706	8.48383e-08	5.75268e-07	-1.59827	-0.676509	0.0109852	0.0217134	4.35771	2.12357	3.69283e-10	2.0784e-09	0.203207	1.65309	-0.493928	0.107157	0.299257	1.66042	1.53448	1.76437	-0.942241	-0.437654	-0.101891
-0.113817	-0.215308	1.49682	0.983599	0.769015	-0.612727	-0.926364	-1.38122	ADAMTS19-AS1	chr5	129424782	129426853	-	3314	ADAMTS19 antisense RNA 1				3.25994	1.70484	0.000806168	0.00220125	-2.13427	-1.09375	0.0878399	0.136991	6.9576	2.79859	1.37508e-05	3.75111e-05	-2.57561	-0.920693	-3.64848	-2.50831	-2.64292	-0.372003	-1.05273	-1.33735	-3.17005	-3.58605	-4.18935
-1.51984	-1.50714	0.745973	0.352566	-0.184724	0.647405	0.408575	1.05719	ADAMTS2	chr5	179110853	179114324	-	8965	ADAM metallopeptidase with thrombospondin type 1 motif 2	GO:0007283spermatogenesis//GO:0016485proteinprocessing//GO:0030198extracellularmatrixorganization//GO:0030199collagenfibrilorganization//GO:0030324lungdevelopment//GO:0030574collagencatabolicprocess//GO:0043588skindevelopment	GO:0005576extracellularregion//GO:0031012extracellularmatrix//GO:0062023collagen-containingextracellularmatrix	GO:0004222metalloendopeptidaseactivity//GO:0008237metallopeptidaseactivity//GO:0008270zincionbinding	8.89955	3.15373	0.00223819	0.00551584	13.6987	3.77596	0.000378953	0.00100419	-1.53925	-0.622232	0.152479	0.204738	-5.46103	-2.38353	-1.70681	-5.47178	-5.45028	-1.63642	-2.30234	-3.21182	-1.80326	-2.20753	-1.10963
-1.23895	-0.826186	0.531198	1.59418	1.1704	-0.57525	-0.474886	-0.180508	ADAMTS20	chr12	43353866	43354298	-	7464	ADAM metallopeptidase with thrombospondin type 1 motif 20	GO:0006508proteolysis//GO:0009967positiveregulationofsignaltransduction//GO:0030198extracellularmatrixorganization//GO:0043066negativeregulationofapoptoticprocess//GO:0045636positiveregulationofmelanocytedifferentiation	GO:0005615extracellularspace//GO:0031012extracellularmatrix//GO:0062023collagen-containingextracellularmatrix	GO:0004222metalloendopeptidaseactivity//GO:0008270zincionbinding	2.88199	1.52706	2.07296e-05	8.06918e-05	1.37743	0.46198	0.162828	0.233205	2.09229	1.06508	0.000144663	0.000338426	-0.956815	0.596205	-0.503294	-1.10721	-0.806421	0.182733	0.957349	0.648533	-0.623559	-0.550422	-0.335902
1.06353	0.336965	-1.2673	-1.06109	-0.924256	0.0971951	1.43414	0.320824	ADAMTS4	chr1	161184302	161191564	-	10338	ADAM metallopeptidase with thrombospondin type 1 motif 4	GO:0001501skeletalsystemdevelopment//GO:0006508proteolysis//GO:0022617extracellularmatrixdisassembly//GO:0030198extracellularmatrixorganization	GO:0005576extracellularregion//GO:0005615extracellularspace//GO:0016607nuclearspeck//GO:0031012extracellularmatrix//GO:0062023collagen-containingextracellularmatrix	GO:0002020proteasebinding//GO:0004222metalloendopeptidaseactivity//GO:0005515proteinbinding//GO:0008233peptidaseactivity//GO:0008237metallopeptidaseactivity//GO:0046872metalionbinding	-1.83365	-0.874715	0.00841713	0.0181552	-1.02984	-0.0424202	0.880672	0.911122	-1.78052	-0.832295	0.00851	0.0150165	-0.750628	-1.61558	-0.790793	-0.574541	-0.926716	-1.70432	-1.60437	-1.53804	-1.04293	-0.394904	-0.93454
0.673548	0.638954	0.432873	0.960606	0.700084	-1.77012	-0.635857	-1.00009	ADAMTS6	chr5	65148738	65151945	-	8565	ADAM metallopeptidase with thrombospondin type 1 motif 6	GO:0001822kidneydevelopment//GO:0003279cardiacseptumdevelopment//GO:0006508proteolysis//GO:0030198extracellularmatrixorganization//GO:0035904aortadevelopment//GO:0060976coronaryvasculaturedevelopment	GO:0005576extracellularregion//GO:0031012extracellularmatrix	GO:0004222metalloendopeptidaseactivity//GO:0008237metallopeptidaseactivity//GO:0046872metalionbinding	1.02545	0.0362577	0.917131	0.939527	-6.2959	-2.65441	0.000135647	0.000389012	6.45613	2.69067	6.96998e-05	0.000171507	-1.47964	-1.41763	-4.14995	-1.45386	-1.50542	-1.81258	-1.02601	-1.41431	-5.09605	-3.40547	-3.94835
-0.690899	-0.0431544	-0.850853	-0.719864	-1.08628	1.32157	1.35933	0.710152	ADAMTS7	chr15	78759206	78759578	-	7760	ADAM metallopeptidase with thrombospondin type 1 motif 7	GO:0030198extracellularmatrixorganization//GO:0032331negativeregulationofchondrocytedifferentiation//GO:0051603proteolysisinvolvedincellularproteincatabolicprocess//GO:0071347cellularresponsetointerleukin-1//GO:0071356cellularresponsetotumornecrosisfactor//GO:0071773cellularresponsetoBMPstimulus	GO:0005576extracellularregion//GO:0005788endoplasmicreticulumlumen//GO:0031012extracellularmatrix	GO:0004222metalloendopeptidaseactivity//GO:0005515proteinbinding//GO:0008237metallopeptidaseactivity//GO:0046872metalionbinding	-1.36734	-0.451369	0.150691	0.22288	2.49842	1.32102	3.8787e-05	0.000121401	-3.41619	-1.77239	2.83861e-07	1.00248e-06	-0.659773	-1.12168	0.673818	-0.948219	-0.371326	-1.09068	-0.974016	-1.30035	0.84412	0.877751	0.299582
-1.52675	-1.20813	1.05442	0.87885	0.945729	0.303401	0.121701	-0.569222	ADAMTS7P3	chr15	77976042	77976187	+	3758	ADAMTS7 pseudogene 3				13.1246	3.7142	6.34524e-05	0.000220495	4.19683	2.0693	0.0189017	0.0353714	3.12726	1.6449	0.000989586	0.00203114	-5.21832	-1.51587	-3.11914	-5.47178	-4.96485	-1.36512	-1.64445	-1.53804	-2.55999	-2.84908	-3.94835
0.888867	1.21233	1.3061	-0.548301	-0.36304	-1.00816	-0.254653	-1.23314	ADAMTS7P4	chr15	85255369	85255741	-	5602	ADAMTS7 pseudogene 4				-1.8212	-0.864887	0.178648	0.257021	-3.83227	-1.9382	0.0166739	0.0315962	2.10426	1.07331	0.170243	0.225591	-2.98393	-3.92676	-4.9153	-3.14985	-2.81801	-2.72181	-4.62427	-4.43421	-5.09605	-4.32301	-5.32686
-1.32762	-1.32082	1.04502	0.949174	1.08359	-0.0384989	0.156605	-0.547458	ADAMTS8	chr11	130404923	130406128	-	4141	ADAM metallopeptidase with thrombospondin type 1 motif 8	GO:0006508proteolysis//GO:0008285negativeregulationofcellpopulationproliferation//GO:0030198extracellularmatrixorganization//GO:0035435phosphateiontransmembranetransport	GO:0005576extracellularregion//GO:0031012extracellularmatrix//GO:0062023collagen-containingextracellularmatrix	GO:0004222metalloendopeptidaseactivity//GO:0005178integrinbinding//GO:0008201heparinbinding//GO:0008237metallopeptidaseactivity//GO:0008270zincionbinding//GO:0009673low-affinityphosphatetransmembranetransporteractivity	172.245	7.42832	3.3204e-07	1.93908e-06	12.9747	3.69762	0.00370444	0.00813454	13.2755	3.73069	4.20264e-07	1.44468e-06	-7.78296	-0.351829	-4.04834	-7.79371	-7.77221	-0.291459	-0.594523	-0.169505	-3.71753	-3.10062	-5.32686
1.40649	1.7131	-0.585089	-0.244378	-0.908597	-0.845521	-0.289608	-0.246395	ADAMTS9	chr3	64515654	64517121	-	10680	ADAM metallopeptidase with thrombospondin type 1 motif 9	GO:0003179heartvalvemorphogenesis//GO:0003229ventricularcardiacmuscletissuedevelopment//GO:0006508proteolysis//GO:0006516glycoproteincatabolicprocess//GO:0007275multicellularorganismdevelopment//GO:0010596negativeregulationofendothelialcellmigration//GO:0015031proteintransport//GO:0016192vesicle-mediatedtransport//GO:0030198extracellularmatrixorganization//GO:0035909aortamorphogenesis//GO:0090673…	GO:0005576extracellularregion//GO:0005783endoplasmicreticulum//GO:0031012extracellularmatrix//GO:0043231intracellularmembrane-boundedorganelle//GO:0062023collagen-containingextracellularmatrix	GO:0004222metalloendopeptidaseactivity//GO:0008237metallopeptidaseactivity//GO:0008270zincionbinding	-1.39463	-0.479881	1.85616e-06	9.18886e-06	-1.36868	-0.452787	7.37841e-06	2.60735e-05	-1.01896	-0.0270944	0.720285	0.769509	3.69157	3.20907	3.23587	3.65699	3.72614	3.20777	3.28462	3.1348	3.14903	3.27442	3.28417
-0.88914	-1.18117	1.09851	1.26211	0.970322	-1.0183	-0.17941	-0.062919	ADAMTSL1	chr9	17906563	17906922	+	13446	ADAMTS like 1		GO:0005576extracellularregion//GO:0005788endoplasmicreticulumlumen		6.81327	2.76835	3.92099e-08	2.89352e-07	1.7633	0.818281	0.0465859	0.0787223	3.86392	1.95007	6.8158e-08	2.66011e-07	-1.6068	1.15743	-0.8145	-1.41867	-1.79493	1.14223	1.35301	0.977068	-1.58508	-0.504251	-0.354164
-1.47192	-1.46107	0.960678	0.892212	0.910868	0.0971472	0.298795	-0.226715	ADAMTSL2	chr9	133532164	133532570	+	4677	ADAMTS like 2	GO:0030198extracellularmatrixorganization//GO:0030512negativeregulationoftransforminggrowthfactorbetareceptorsignalingpathway//GO:0060481lobarbronchusepitheliumdevelopment	GO:0005576extracellularregion//GO:0031012extracellularmatrix	GO:0005515proteinbinding//GO:0050436microfibrilbinding	26.6462	4.73586	1.63921e-08	1.33251e-07	7.98264	2.99687	2.97688e-05	9.51973e-05	3.33801	1.73899	6.55277e-08	2.56675e-07	-3.69549	1.03483	-0.678502	-3.70625	-3.68474	1.11293	0.977294	1.01425	-0.597795	-0.198315	-1.23939
-0.171798	0.386021	1.15282	0.86924	0.753812	-1.42484	-1.45845	-0.106807	ADAMTSL3	chr15	83654088	83654276	+	9752	ADAMTS like 3	GO:0030198extracellularmatrixorganization	GO:0005576extracellularregion//GO:0031012extracellularmatrix//GO:0043231intracellularmembrane-boundedorganelle	GO:0005515proteinbinding	3.66545	1.87399	0.00868719	0.0186537	-5.45617	-2.44789	0.0272532	0.0490968	19.9993	4.32188	8.3395e-05	0.000202872	-4.00184	-2.17735	-6.46326	-4.62378	-3.37989	-1.66997	-2.30234	-2.55974	-7.41797	-7.49294	-4.47886
-1.97192	-0.965828	0.394226	0.0938031	0.801484	0.0856946	0.512922	1.04962	ADAMTSL4	chr1	150549369	150549499	+	6432	ADAMTS like 4	GO:0002064epithelialcelldevelopment//GO:0006915apoptoticprocess//GO:0030198extracellularmatrixorganization//GO:0043065positiveregulationofapoptoticprocess	GO:0005576extracellularregion//GO:0005614interstitialmatrix//GO:0005788endoplasmicreticulumlumen//GO:0062023collagen-containingextracellularmatrix	GO:0002020proteasebinding//GO:0005515proteinbinding	3.58632	1.8425	0.00139989	0.00362717	3.99601	1.99856	0.000736533	0.00185995	-1.11424	-0.156058	0.613147	0.67767	-3.05427	-1.19908	-1.08224	-3.54578	-2.56275	-1.23387	-1.52741	-0.835949	-1.53533	-1.1179	-0.593503
-0.702676	-0.489598	-0.596321	-0.974737	-0.801814	1.28138	1.32654	0.957226	ADAMTSL5	chr19	1505022	1506316	-	3621	ADAMTS like 5		GO:0001527microfibril//GO:0005576extracellularregion//GO:0031012extracellularmatrix	GO:0005515proteinbinding//GO:0008201heparinbinding//GO:0050436microfibrilbinding	-1.05773	-0.0809715	0.359102	0.455041	1.72698	0.78825	2.25364e-09	1.41267e-08	-1.82668	-0.869222	3.87284e-11	2.60151e-10	3.16568	3.07928	3.95705	3.11843	3.21292	3.1656	2.99778	3.07447	3.9983	4.01832	3.85454
1.26539	0.729369	-1.21437	-1.10717	-1.10645	0.256784	0.891636	0.284813	ADAP1	chr7	897900	898949	-	5063	ArfGAP with dual PH domains 1	GO:0007166cellsurfacereceptorsignalingpathway//GO:0043087regulationofGTPaseactivity//GO:0043547positiveregulationofGTPaseactivity	GO:0005634nucleus//GO:0005737cytoplasm//GO:0005829cytosol//GO:0005886plasmamembrane//GO:0043231intracellularmembrane-boundedorganelle	GO:0005096GTPaseactivatoractivity//GO:0005515proteinbinding//GO:0005547phosphatidylinositol-3,4,5-trisphosphatebinding//GO:0043533inositol1,3,4,5tetrakisphosphatebinding//GO:0046872metalionbinding//GO:1902936phosphatidylinositolbisphosphatebinding	-1.43375	-0.519796	3.69672e-09	3.53519e-08	-1.09172	-0.126602	0.0309949	0.0548925	-1.3133	-0.393195	1.27834e-07	4.76732e-07	5.47686	4.95813	5.3509	5.54182	5.41189	4.94075	4.96673	4.96691	5.29734	5.45123	5.30414
-1.39721	-0.769936	1.08315	1.1315	1.19042	-0.634111	-0.300274	-0.303537	ADAP2	chr17	30906344	30906644	+	3750	ArfGAP with dual PH domains 2	GO:0007507heartdevelopment//GO:0043547positiveregulationofGTPaseactivity//GO:0048017inositollipid-mediatedsignaling	GO:0005737cytoplasm//GO:0005740mitochondrialenvelope//GO:0005886plasmamembrane//GO:0043231intracellularmembrane-boundedorganelle	GO:0005096GTPaseactivatoractivity//GO:0005515proteinbinding//GO:0005546phosphatidylinositol-4,5-bisphosphatebinding//GO:0005547phosphatidylinositol-3,4,5-trisphosphatebinding//GO:0030674protein-macromoleculeadaptoractivity//GO:0043325phosphatidylinositol-3,4-bisphosphatebinding//GO:0043533inositol1,3,4,5tetrakisphosphatebinding//GO:0046872metalionbinding	21.0103	4.39303	3.94102e-09	3.73463e-08	2.54543	1.34791	0.0194937	0.0363904	8.25413	3.04512	5.09166e-10	2.80389e-09	-3.26487	1.13464	-1.9344	-3.88682	-2.64292	1.03177	1.12765	1.24449	-2.37358	-1.71158	-1.71805
0.698496	0.701659	0.993576	0.686102	0.434355	-1.30655	-0.765233	-1.4424	ADAR	chr1	154581695	154585043	-	12242	adenosine deaminase RNA specific	GO:0001649osteoblastdifferentiation//GO:0002244hematopoieticprogenitorcelldifferentiation//GO:0002566somaticdiversificationofimmunereceptorsviasomaticmutation//GO:0006382adenosinetoinosineediting//GO:0006396RNAprocessing//GO:0006397mRNAprocessing//GO:0009615responsetovirus//GO:0016553baseconversionorsubstitutionediting//GO:0030218erythrocytedifferentiation//GO:0031054pre-miRNAprocessing//GO:00352…	GO:0005634nucleus//GO:0005654nucleoplasm//GO:0005730nucleolus//GO:0005737cytoplasm//GO:0016020membrane//GO:0044530supraspliceosomalcomplex	GO:0003677DNAbinding//GO:0003723RNAbinding//GO:0003725double-strandedRNAbinding//GO:0003726double-strandedRNAadenosinedeaminaseactivity//GO:0005515proteinbinding//GO:0008251tRNA-specificadenosinedeaminaseactivity//GO:0046872metalionbinding	1.00136	0.00196139	0.953774	0.966391	-1.1993	-0.262193	1.24619e-07	5.84915e-07	1.20093	0.264154	1.80477e-08	7.70742e-08	9.10949	9.11013	8.84762	9.10927	9.10971	9.15056	9.10753	9.07231	8.82871	8.90445	8.8097
-0.399878	-0.238543	1.21199	1.18216	1.07773	-1.08769	-0.717417	-1.02835	ADARB1	chr21	45073853	45073903	+	10049	adenosine deaminase RNA specific B1	GO:0006382adenosinetoinosineediting//GO:0006396RNAprocessing//GO:0006397mRNAprocessing//GO:0007274neuromuscularsynaptictransmission//GO:0008285negativeregulationofcellpopulationproliferation//GO:0016553baseconversionorsubstitutionediting//GO:0021610facialnervemorphogenesis//GO:0021618hypoglossalnervemorphogenesis//GO:0021965spinalcordventralcommissuremorphogenesis//GO:0030336negativeregulationofc…	GO:0005634nucleus//GO:0005654nucleoplasm//GO:0005730nucleolus//GO:0005737cytoplasm//GO:0005829cytosol//GO:0045202synapse	GO:0003723RNAbinding//GO:0003725double-strandedRNAbinding//GO:0003726double-strandedRNAadenosinedeaminaseactivity//GO:0003729mRNAbinding//GO:0005515proteinbinding//GO:0008251tRNA-specificadenosinedeaminaseactivity//GO:0046872metalionbinding	1.44403	0.530106	1.05289e-09	1.15491e-08	-1.16792	-0.223945	0.000750149	0.00189122	1.68652	0.754051	3.61886e-13	3.60006e-12	4.81614	5.3449	4.59222	4.78726	4.84503	5.36449	5.3538	5.31641	4.54094	4.67354	4.56219
-0.889687	-0.217172	1.11105	1.19827	1.23087	-0.781859	-0.803371	-0.848097	ADARB2	chr10	1177313	1183369	-	10567	adenosine deaminase RNA specific B2 (inactive)	GO:0006382adenosinetoinosineediting//GO:0006396RNAprocessing//GO:0006397mRNAprocessing	GO:0005730nucleolus//GO:0005737cytoplasm	GO:0003723RNAbinding//GO:0003725double-strandedRNAbinding//GO:0003726double-strandedRNAadenosinedeaminaseactivity//GO:0003727single-strandedRNAbinding//GO:0004000adenosinedeaminaseactivity//GO:0008251tRNA-specificadenosinedeaminaseactivity//GO:0046872metalionbinding	65.07	6.02392	3.26354e-06	1.52742e-05	-1.85706	-0.893023	0.480715	0.572909	120.839	6.91694	1.73757e-08	7.4481e-08	-6.62199	-0.581502	-7.5199	-7.79371	-5.45028	-0.821974	-0.518071	-0.404461	-7.41797	-7.49294	-7.64879
0.489555	0.496803	1.00529	0.766161	0.806259	-1.33315	-1.10853	-1.12238	ADAT1	chr16	75596868	75600348	-	6118	adenosine deaminase tRNA specific 1	GO:0008033tRNAprocessing		GO:0003723RNAbinding//GO:0008251tRNA-specificadenosinedeaminaseactivity//GO:0046872metalionbinding	1.05579	0.0783259	0.0938825	0.149779	-1.27811	-0.354011	1.6704e-07	7.68025e-07	1.34942	0.432337	8.03526e-10	4.27332e-09	5.62029	5.69749	5.2657	5.61952	5.62105	5.72829	5.67786	5.68632	5.23509	5.28247	5.27955
1.07828	0.551268	-1.19396	-0.744608	-1.31565	-0.222538	0.740724	1.10648	ADAT2	chr6	143422832	143428506	-	7197	adenosine deaminase tRNA specific 2	GO:0002100tRNAwobbleadenosinetoinosineediting	GO:0005654nucleoplasm	GO:0005515proteinbinding//GO:0008270zincionbinding//GO:0052717tRNA-specificadenosine-34deaminaseactivity	-1.26426	-0.338293	2.48602e-05	9.50403e-05	-1.03174	-0.0450809	0.48727	0.579015	-1.22537	-0.293212	5.85289e-05	0.000145515	4.86649	4.52811	4.81782	4.91343	4.81955	4.50865	4.5887	4.48697	4.6817	4.8533	4.91846
1.23351	1.35161	0.0962723	0.106619	0.152664	-1.00138	-0.367782	-1.57151	ADAT3	chr19	1905399	1905439	+	2216	adenosine deaminase tRNA specific 3	GO:0008033tRNAprocessing	GO:0005654nucleoplasm	GO:0005515proteinbinding//GO:0046872metalionbinding//GO:0052717tRNA-specificadenosine-34deaminaseactivity	-1.27574	-0.35134	0.00270436	0.00653415	-1.607	-0.684367	5.04491e-06	1.82829e-05	1.25965	0.333028	0.00573986	0.0104081	2.51279	2.1621	1.8339	2.49516	2.53043	2.15546	2.15855	2.1723	1.82758	2.01684	1.65728
-0.403294	-0.637005	0.947789	1.46307	1.13475	-0.787864	-0.789802	-0.927645	ADCK1	chr14	77800109	77800170	+	5293	aarF domain containing kinase 1	GO:0006468proteinphosphorylation//GO:0007005mitochondrionorganization//GO:0010637negativeregulationofmitochondrialfusion//GO:0055088lipidhomeostasis//GO:1903852positiveregulationofcristaeformation	GO:0005576extracellularregion//GO:0005743mitochondrialinnermembrane//GO:0032592integralcomponentofmitochondrialmembrane	GO:0004674proteinserine/threoninekinaseactivity//GO:0005524ATPbinding	1.34616	0.428851	1.22733e-06	6.32946e-06	-1.05763	-0.0808392	0.264326	0.351985	1.42374	0.50969	2.53413e-08	1.05592e-07	3.81918	4.25055	3.73935	3.84879	3.78956	4.19123	4.32182	4.23861	3.75132	3.75083	3.7159
0.683479	0.853627	0.965028	0.688267	0.3257	-0.877699	-1.17399	-1.46441	ADCK2	chr7	140672945	140674263	+	3110	aarF domain containing kinase 2	GO:0006468proteinphosphorylation	GO:0016021integralcomponentofmembrane	GO:0004674proteinserine/threoninekinaseactivity//GO:0005515proteinbinding//GO:0005524ATPbinding	-1.01847	-0.0264068	0.693048	0.764252	-1.52051	-0.604552	3.3421e-08	1.71739e-07	1.49293	0.578146	1.52562e-08	6.59371e-08	4.33428	4.30057	3.73348	4.30794	4.36062	4.3951	4.30942	4.19717	3.8246	3.73287	3.64296
0.905725	1.30174	-0.534688	0.508259	0.315805	-0.24445	-0.337264	-1.91512	ADCK5	chr8	144373101	144373260	+	2742	aarF domain containing kinase 5	GO:0006468proteinphosphorylation	GO:0016021integralcomponentofmembrane	GO:0004674proteinserine/threoninekinaseactivity//GO:0005515proteinbinding	-1.07403	-0.103041	0.100307	0.158423	-1.14502	-0.195377	0.00489098	0.0104836	1.06609	0.092336	0.117883	0.162895	4.64616	4.54622	4.45407	4.62651	4.66581	4.4836	4.58708	4.56798	4.51239	4.50318	4.34663
-0.10164	-0.7431	1.08244	1.05003	1.20528	-1.46682	-0.640384	-0.38581	ADCY1	chr7	45574140	45574188	+	13966	adenylate cyclase 1	GO:0006171cAMPbiosyntheticprocess//GO:0007189adenylatecyclase-activatingGprotein-coupledreceptorsignalingpathway//GO:0007409axonogenesis//GO:0007420braindevelopment//GO:0007616long-termmemory//GO:0007623circadianrhythm//GO:0009410responsetoxenobioticstimulus//GO:0010226responsetolithiumion//GO:0019933cAMP-mediatedsignaling//GO:0032793positiveregulationofCREBtranscriptionfactoractivity//GO:0042752…	GO:0005634nucleus//GO:0005737cytoplasm//GO:0005886plasmamembrane//GO:0005887integralcomponentofplasmamembrane//GO:0045121membraneraft//GO:0070062extracellularexosome//GO:0098685Schaffercollateral-CA1synapse//GO:0098686hippocampalmossyfibertoCA3synapse//GO:0098978glutamatergicsynapse//GO:0099061integralcomponentofpostsynapticdensitymembrane	GO:0004016adenylatecyclaseactivity//GO:0005516calmodulinbinding//GO:0005524ATPbinding//GO:0008294calcium-andcalmodulin-responsiveadenylatecyclaseactivity//GO:0046872metalionbinding	17.8114	4.15473	4.90455e-06	2.19915e-05	-2.10174	-1.07158	0.297543	0.388254	37.4349	5.22631	6.87261e-07	2.29386e-06	-4.57826	-0.404951	-5.68928	-3.70625	-5.45028	-0.486905	-0.575027	-0.152922	-7.41797	-5.17101	-4.47886
-1.28681	-0.135459	-1.62497	0.159677	0.177405	1.24802	0.70112	0.761023	ADCY10	chr1	167809386	167809839	-	6141	adenylate cyclase 10	GO:0003351epithelialciliummovementinvolvedinextracellularfluidmovement//GO:0006171cAMPbiosyntheticprocess//GO:0007283spermatogenesis//GO:0035556intracellularsignaltransduction//GO:0043065positiveregulationofapoptoticprocess//GO:0071241cellularresponsetoinorganicsubstance	GO:0005576extracellularregion//GO:0005634nucleus//GO:0005737cytoplasm//GO:0005739mitochondrion//GO:0005829cytosol//GO:0015630microtubulecytoskeleton//GO:0016324apicalplasmamembrane//GO:0030425dendrite//GO:0030426growthcone//GO:0031514motilecilium//GO:0043025neuronalcellbody//GO:0045178basalpartofcell//GO:0048471perinuclearregionofcytoplasm	GO:0000287magnesiumionbinding//GO:0004016adenylatecyclaseactivity//GO:0005524ATPbinding//GO:0030145manganeseionbinding//GO:0051117ATPasebinding//GO:0071890bicarbonatebinding	1.12293	0.167266	0.790298	0.842896	2.56394	1.35836	0.0279626	0.0502211	-2.28326	-1.19109	0.020309	0.0332763	-3.40052	-3.16244	-2.03667	-3.88682	-2.91422	-4.17247	-2.66491	-2.64994	-1.74555	-2.20753	-2.15693
-0.562468	-1.00248	1.52914	1.03643	0.887871	-0.957785	-0.717781	-0.212918	ADCY10P1	chr6	41101022	41101178	+	5804	ADCY10 pseudogene 1				3.12221	1.64257	1.85005e-05	7.2686e-05	1.10398	0.142719	0.693312	0.762823	2.82813	1.49985	1.16839e-05	3.22131e-05	-1.4385	0.178239	-1.31059	-1.25455	-1.62246	0.494285	0.0823217	-0.0418905	-1.58508	-1.38441	-0.962285
0.572061	0.62846	0.805358	0.810005	0.793282	-1.19659	-1.23534	-1.17723	ADCY3	chr2	24819169	24820114	-	6456	adenylate cyclase 3	GO:0006171cAMPbiosyntheticprocess//GO:0007165signaltransduction//GO:0007189adenylatecyclase-activatingGprotein-coupledreceptorsignalingpathway//GO:0007338singlefertilization//GO:0007340acrosomereaction//GO:0007608sensoryperceptionofsmell//GO:0008355olfactorylearning//GO:0030317flagellatedspermmotility//GO:0035556intracellularsignaltransduction//GO:1904322cellularresponsetoforskolin	GO:0005737cytoplasm//GO:0005794Golgiapparatus//GO:0005886plasmamembrane//GO:0005887integralcomponentofplasmamembrane//GO:0005929cilium//GO:0016020membrane//GO:0016021integralcomponentofmembrane//GO:0060170ciliarymembrane	GO:0004016adenylatecyclaseactivity//GO:0005516calmodulinbinding//GO:0005524ATPbinding//GO:0046872metalionbinding	1.11944	0.162782	0.00222494	0.00548795	-2.72335	-1.44538	1.24711e-17	3.87278e-16	3.04864	1.60816	2.1179e-19	8.76925e-18	5.20958	5.37205	3.76357	5.18697	5.23219	5.37404	5.37776	5.36435	3.76876	3.73768	3.78428
-1.14613	-1.23332	-0.33439	-0.35292	-0.281803	0.866677	1.33716	1.14472	ADCY4	chr14	24318349	24318568	-	8067	adenylate cyclase 4	GO:0006171cAMPbiosyntheticprocess//GO:0007188adenylatecyclase-modulatingGprotein-coupledreceptorsignalingpathway//GO:0007189adenylatecyclase-activatingGprotein-coupledreceptorsignalingpathway//GO:0035556intracellularsignaltransduction	GO:0005737cytoplasm//GO:0005886plasmamembrane//GO:0005887integralcomponentofplasmamembrane//GO:0016020membrane//GO:0030425dendrite	GO:0004016adenylatecyclaseactivity//GO:0005080proteinkinaseCbinding//GO:0005515proteinbinding//GO:0005524ATPbinding//GO:0046872metalionbinding	1.74581	0.803894	8.26775e-05	0.000280764	4.43433	2.14872	2.60728e-12	2.78675e-11	-2.53999	-1.34482	3.05205e-11	2.09362e-10	0.93723	1.74337	3.08206	0.97778	0.896679	1.73282	1.71558	1.78173	2.84998	3.2876	3.1086
-1.85373	-0.725857	0.431779	0.819526	0.414941	-0.558906	1.28859	0.183662	ADCY5	chr3	123282296	123284736	-	9218	adenylate cyclase 5	GO:0001973Gprotein-coupledadenosinereceptorsignalingpathway//GO:0006171cAMPbiosyntheticprocess//GO:0007189adenylatecyclase-activatingGprotein-coupledreceptorsignalingpathway//GO:0007191adenylatecyclase-activatingdopaminereceptorsignalingpathway//GO:0007193adenylatecyclase-inhibitingGprotein-coupledreceptorsignalingpathway//GO:0007195adenylatecyclase-inhibitingdopaminereceptorsignalingpathway//GO:…	GO:0005886plasmamembrane//GO:0005887integralcomponentofplasmamembrane//GO:0005929cilium//GO:0016021integralcomponentofmembrane//GO:0045111intermediatefilamentcytoskeleton	GO:0004016adenylatecyclaseactivity//GO:0005524ATPbinding//GO:0008179adenylatecyclasebinding//GO:0046872metalionbinding//GO:0097110scaffoldproteinbinding	2.17092	1.11831	0.0046192	0.0105716	1.96348	0.973412	0.0150176	0.0287707	1.10565	0.144895	0.592013	0.658429	-1.67081	-0.553272	-0.705267	-2.01235	-1.32926	-0.628151	-0.393316	-0.638349	-1.22815	-0.109232	-0.77842
0.972097	1.15529	-0.426688	-1.14598	-1.51472	-0.32131	0.583597	0.697708	ADCY6	chr12	48766194	48768716	-	8462	adenylate cyclase 6	GO:0003091renalwaterhomeostasis//GO:0006171cAMPbiosyntheticprocess//GO:0007189adenylatecyclase-activatingGprotein-coupledreceptorsignalingpathway//GO:0007193adenylatecyclase-inhibitingGprotein-coupledreceptorsignalingpathway//GO:0007212dopaminereceptorsignalingpathway//GO:0010977negativeregulationofneuronprojectiondevelopment//GO:0035556intracellularsignaltransduction//GO:0035811negativeregulatio…	GO:0005886plasmamembrane//GO:0005887integralcomponentofplasmamembrane//GO:0005929cilium//GO:0016020membrane//GO:0031226intrinsiccomponentofplasmamembrane//GO:0032420stereocilium	GO:0004016adenylatecyclaseactivity//GO:0005080proteinkinaseCbinding//GO:0005515proteinbinding//GO:0005524ATPbinding//GO:0019901proteinkinasebinding//GO:0046872metalionbinding	-1.19644	-0.258745	1.40125e-05	5.64728e-05	-1.06567	-0.091756	0.0635495	0.103557	-1.12271	-0.166989	0.000759754	0.00158936	6.68821	6.42659	6.59524	6.67676	6.69966	6.5019	6.41198	6.36588	6.51507	6.62819	6.64246
0.734928	1.06375	-0.57546	-0.990366	-1.75392	0.841556	0.362056	0.317458	ADCY6-DT	chr12	48789147	48789227	+	554	ADCY6 divergent transcript				-2.48268	-1.3119	5.72217e-07	3.17488e-06	-1.20639	-0.270702	0.118947	0.178106	-2.05794	-1.0412	1.22601e-05	3.37247e-05	1.49436	0.144401	1.23033	1.38371	1.605	0.501839	0.222613	-0.29125	1.45547	1.13277	1.10276
-0.673611	-0.0640647	-0.919588	-0.648449	-1.09578	0.914591	0.972834	1.51407	ADCY7	chr16	50246137	50246203	+	8595	adenylate cyclase 7	GO:0002819regulationofadaptiveimmuneresponse//GO:0006171cAMPbiosyntheticprocess//GO:0007189adenylatecyclase-activatingGprotein-coupledreceptorsignalingpathway//GO:0035556intracellularsignaltransduction//GO:0060135maternalprocessinvolvedinfemalepregnancy//GO:0071285cellularresponsetolithiumion//GO:0071361cellularresponsetoethanol//GO:1900016negativeregulationofcytokineproductioninvolvedininflammat…	GO:0005886plasmamembrane//GO:0005887integralcomponentofplasmamembrane//GO:0016021integralcomponentofmembrane	GO:0004016adenylatecyclaseactivity//GO:0005524ATPbinding//GO:0046872metalionbinding	-1.08995	-0.124258	0.281836	0.372784	1.29151	0.369054	0.00292087	0.00654781	-1.40767	-0.493312	5.79177e-05	0.000144089	2.05013	1.92409	2.41498	1.97613	2.12413	1.91641	1.98224	1.87363	2.36174	2.37589	2.5073
-0.182105	-0.561706	1.33647	0.826313	1.29761	-1.00963	-0.747727	-0.95923	ADCY9	chr16	3953387	3953516	-	10613	adenylate cyclase 9	GO:0001701inuteroembryonicdevelopment//GO:0006171cAMPbiosyntheticprocess//GO:0007165signaltransduction//GO:0007189adenylatecyclase-activatingGprotein-coupledreceptorsignalingpathway//GO:0035556intracellularsignaltransduction//GO:0071880adenylatecyclase-activatingadrenergicreceptorsignalingpathway	GO:0005886plasmamembrane//GO:0005887integralcomponentofplasmamembrane//GO:0016021integralcomponentofmembrane//GO:0030424axon//GO:0030425dendrite	GO:0004016adenylatecyclaseactivity//GO:0005524ATPbinding//GO:0046872metalionbinding	1.29403	0.371867	3.76181e-07	2.16929e-06	-1.09438	-0.130114	0.027846	0.0500435	1.41616	0.501981	5.88618e-10	3.20228e-09	5.20567	5.57706	5.07574	5.25188	5.15946	5.62162	5.49741	5.61216	5.0504	5.11416	5.06267
-0.502433	-0.473216	1.23321	1.2065	1.0905	-0.883873	-0.534384	-1.13631	ADD1	chr4	2843844	2844024	+	13240	adducin 1	GO:0030036actincytoskeletonorganization//GO:0032092positiveregulationofproteinbinding//GO:0051016barbed-endactinfilamentcapping//GO:0051017actinfilamentbundleassembly//GO:0071277cellularresponsetocalciumion//GO:1903142positiveregulationofestablishmentofendothelialbarrier//GO:1903393positiveregulationofadherensjunctionorganization	GO:0005634nucleus//GO:0005654nucleoplasm//GO:0005737cytoplasm//GO:0005829cytosol//GO:0005856cytoskeleton//GO:0005886plasmamembrane//GO:0005912adherensjunction//GO:0005925focaladhesion//GO:0008290F-actincappingproteincomplex//GO:0014069postsynapticdensity//GO:0016604nuclearbody	GO:0003723RNAbinding//GO:0003779actinbinding//GO:0005515proteinbinding//GO:0005516calmodulinbinding//GO:0008134transcriptionfactorbinding//GO:0030507spectrinbinding//GO:0042803proteinhomodimerizationactivity//GO:0045296cadherinbinding//GO:0046982proteinheterodimerizationactivity//GO:0051015actinfilamentbinding	1.145	0.195352	1.47064e-05	5.90519e-05	-1.03025	-0.0429995	0.247631	0.333835	1.17964	0.238352	1.97045e-07	7.1286e-07	7.52397	7.71903	7.48134	7.52225	7.52568	7.72565	7.72252	7.70893	7.47755	7.51851	7.44797
-0.37459	-0.47053	1.21842	1.283	0.996388	-1.11989	-0.973728	-0.55907	ADD3	chr10	109996368	109996446	+	6539	adducin 3	GO:0007010cytoskeletonorganization//GO:0051016barbed-endactinfilamentcapping	GO:0000794condensednuclearchromosome//GO:0005829cytosol//GO:0005856cytoskeleton//GO:0005886plasmamembrane//GO:0005903brushborder//GO:0005911cell-celljunction//GO:0005938cellcortex//GO:0014069postsynapticdensity//GO:0016020membrane	GO:0005200structuralconstituentofcytoskeleton//GO:0005516calmodulinbinding//GO:0051015actinfilamentbinding	1.21522	0.281223	5.20107e-08	3.71412e-07	-1.05753	-0.0806948	0.0350547	0.0612219	1.28513	0.361918	1.03847e-10	6.44623e-10	8.25384	8.53449	8.17227	8.26231	8.24536	8.54376	8.55517	8.50453	8.13064	8.15646	8.22972
0.661996	0.211388	-0.759148	-1.78542	1.27521	0.733078	0.347525	-0.684633	ADD3-AS1	chr10	109940104	109941669	-	9085	ADD3 antisense RNA 1				-1.17036	-0.226952	0.346101	0.442069	-1.05871	-0.0823009	0.736512	0.800542	-1.10546	-0.144651	0.523336	0.594412	-0.140564	-0.347454	-0.213882	-0.0863503	-0.194777	-0.42831	-0.675254	0.061203	-0.0692463	-0.162019	-0.41038
0.769961	-0.98378	0.540165	0.603705	1.40634	-1.13292	-1.23325	0.0297705	ADGB	chr6	146598967	146599114	+	7771	androglobin	GO:0006508proteolysis		GO:0004198calcium-dependentcysteine-typeendopeptidaseactivity//GO:0019825oxygenbinding//GO:0020037hemebinding	1.6025	0.680324	0.130898	0.198014	-1.3992	-0.484606	0.363689	0.458175	2.24222	1.16493	0.0148339	0.0249833	-2.25905	-1.54403	-2.76107	-1.60388	-2.91422	-1.77558	-1.72811	-1.1284	-3.02566	-3.10062	-2.15693
-1.72867	-0.120032	0.9774	1.03356	0.951468	0.287579	-0.65634	-0.744964	ADGRA1	chr10	133087924	133088138	+	4357	adhesion G protein-coupled receptor A1	GO:0007165signaltransduction//GO:0007166cellsurfacereceptorsignalingpathway//GO:0007186Gprotein-coupledreceptorsignalingpathway	GO:0005886plasmamembrane//GO:0014069postsynapticdensity//GO:0016021integralcomponentofmembrane//GO:0098978glutamatergicsynapse	GO:0004930Gprotein-coupledreceptoractivity	10.3324	3.3691	0.00284301	0.00682822	1.93451	0.951972	0.418151	0.512897	5.34108	2.41713	0.00386112	0.00721019	-6.37928	-3.01725	-5.40662	-7.79371	-4.96485	-3.03497	-2.93621	-3.08057	-4.24805	-5.90797	-6.06382
-0.212549	-0.184977	1.08942	1.12885	1.16346	-0.731977	-1.25602	-0.996216	ADGRA2	chr8	37784191	37784330	+	7084	adhesion G protein-coupled receptor A2	GO:0002040sproutingangiogenesis//GO:0007166cellsurfacereceptorsignalingpathway//GO:0007186Gprotein-coupledreceptorsignalingpathway//GO:0007417centralnervoussystemdevelopment//GO:0010595positiveregulationofendothelialcellmigration//GO:0016055Wntsignalingpathway//GO:0043542endothelialcellmigration//GO:0045765regulationofangiogenesis//GO:0050920regulationofchemotaxis//GO:0090210regulationofestablish…	GO:0005886plasmamembrane//GO:0009986cellsurface//GO:0016021integralcomponentofmembrane//GO:0030175filopodium//GO:1990909Wntsignalosome	GO:0004930Gprotein-coupledreceptoractivity//GO:0005515proteinbinding	6.08057	2.60421	9.59815e-10	1.0676e-08	-2.97749	-1.5741	0.00115083	0.00279852	18.1049	4.17831	6.07394e-11	3.93958e-10	-1.32362	1.28745	-2.89098	-1.35077	-1.29647	1.21296	1.29061	1.35876	-2.37358	-3.40547	-2.8939
0.160268	0.251505	1.02516	1.04516	0.934595	-1.13691	-1.17892	-1.10085	ADGRA3	chr4	22345071	22345345	-	9261	adhesion G protein-coupled receptor A3	GO:0007166cellsurfacereceptorsignalingpathway//GO:0007186Gprotein-coupledreceptorsignalingpathway	GO:0005886plasmamembrane//GO:0009897externalsideofplasmamembrane//GO:0016021integralcomponentofmembrane	GO:0004930Gprotein-coupledreceptoractivity	1.16183	0.216399	1.71507e-05	6.78938e-05	-1.28761	-0.364698	1.28114e-08	7.04153e-08	1.49599	0.581097	1.98312e-13	2.09787e-12	6.33184	6.54776	5.96694	6.31946	6.34422	6.55414	6.55957	6.52957	5.96748	5.95608	5.97727
-0.768615	-0.689691	1.19238	1.15443	1.25067	-0.876326	-0.474028	-0.788823	ADGRB1	chr8	142449430	142450104	+	7356	adhesion G protein-coupled receptor B1	GO:0006910phagocytosis,recognition//GO:0007155celladhesion//GO:0007165signaltransduction//GO:0007166cellsurfacereceptorsignalingpathway//GO:0007186Gprotein-coupledreceptorsignalingpathway//GO:0007189adenylatecyclase-activatingGprotein-coupledreceptorsignalingpathway//GO:0007409axonogenesis//GO:0007422peripheralnervoussystemdevelopment//GO:0007517muscleorgandevelopment//GO:0008285negativeregulatio…	GO:0001891phagocyticcup//GO:0005615extracellularspace//GO:0005886plasmamembrane//GO:0005887integralcomponentofplasmamembrane//GO:0005911cell-celljunction//GO:0005925focaladhesion//GO:0014069postsynapticdensity//GO:0016021integralcomponentofmembrane//GO:0030425dendrite//GO:0043197dendriticspine//GO:0048471perinuclearregionofcytoplasm	GO:0001530lipopolysaccharidebinding//GO:0001786phosphatidylserinebinding//GO:0004930Gprotein-coupledreceptoractivity//GO:0005515proteinbinding//GO:0030165PDZdomainbinding	2.30416	1.20424	1.29169e-17	2.28331e-15	1.00705	0.0101306	0.845721	0.883917	2.28804	1.19411	1.53093e-18	5.13586e-17	7.39416	8.59886	7.40422	7.36951	7.41881	8.59462	8.57091	8.63104	7.30222	7.55355	7.35688
-1.24396	-1.85056	0.319889	0.423536	0.0915175	0.810391	0.849299	0.599887	ADGRB2	chr1	31727117	31727605	-	7756	adhesion G protein-coupled receptor B2	GO:0007166cellsurfacereceptorsignalingpathway//GO:0007186Gprotein-coupledreceptorsignalingpathway//GO:0007189adenylatecyclase-activatingGprotein-coupledreceptorsignalingpathway//GO:0007422peripheralnervoussystemdevelopment//GO:0016525negativeregulationofangiogenesis//GO:0033173calcineurin-NFATsignalingcascade	GO:0005886plasmamembrane//GO:0005887integralcomponentofplasmamembrane//GO:0016021integralcomponentofmembrane	GO:0004930Gprotein-coupledreceptoractivity//GO:0005515proteinbinding	6.84876	2.77584	2.29385e-07	1.39488e-06	11.101	3.47261	4.35052e-09	2.58711e-08	-1.62087	-0.696769	0.00028719	0.000643302	-2.10336	0.661797	1.38108	-1.64396	-2.56275	0.724769	0.881762	0.378861	1.46772	1.52665	1.14888
-0.417752	1.31078	0.0174009	-0.723161	1.733	-0.754896	-0.175325	-0.990044	ADGRB3	chr6	68635282	68636000	+	7635	adhesion G protein-coupled receptor B3	GO:0007166cellsurfacereceptorsignalingpathway//GO:0007186Gprotein-coupledreceptorsignalingpathway//GO:0007189adenylatecyclase-activatingGprotein-coupledreceptorsignalingpathway//GO:0007520myoblastfusion//GO:0016322neuronremodeling//GO:0016525negativeregulationofangiogenesis//GO:0048814regulationofdendritemorphogenesis//GO:0050790regulationofcatalyticactivity//GO:0051965positiveregulationofsynapse…	GO:0005886plasmamembrane//GO:0005887integralcomponentofplasmamembrane//GO:0016021integralcomponentofmembrane//GO:0043083synapticcleft//GO:0098794postsynapse	GO:0004930Gprotein-coupledreceptoractivity//GO:0005096GTPaseactivatoractivity//GO:0005515proteinbinding	-1.05573	-0.0782401	0.829252	0.873575	-1.41494	-0.500737	0.224669	0.307517	1.34025	0.422497	0.26195	0.328617	-1.37457	-1.42236	-1.87341	-1.77134	-0.97779	-1.57157	-1.91155	-0.783954	-1.92612	-1.66005	-2.03408
-1.01307	-0.461145	1.18816	1.28375	1.10364	-0.783381	-0.635508	-0.682442	ADGRD1	chr12	130953907	130954531	+	14718	adhesion G protein-coupled receptor D1	GO:0007166cellsurfacereceptorsignalingpathway//GO:0007186Gprotein-coupledreceptorsignalingpathway//GO:0007189adenylatecyclase-activatingGprotein-coupledreceptorsignalingpathway	GO:0005654nucleoplasm//GO:0005886plasmamembrane//GO:0005887integralcomponentofplasmamembrane//GO:0016021integralcomponentofmembrane	GO:0004930Gprotein-coupledreceptoractivity//GO:0005515proteinbinding	8.95826	3.16322	2.30616e-10	3.04747e-09	1.0469	0.0661225	0.85857	0.893971	8.55694	3.0971	3.16988e-11	2.16991e-10	-1.50939	1.64606	-1.44941	-1.96082	-1.05796	1.64003	1.79639	1.50178	-1.58508	-1.34319	-1.41997
-0.275712	-0.00823378	1.21155	1.16052	0.755889	-1.30261	-1.34216	-0.199244	ADGRD1-AS1	chr12	130990138	130991137	-	1277	ADGRD1 antisense RNA 1				4.86606	2.28275	0.00896927	0.0192073	-2.88066	-1.5264	0.169069	0.240914	14.0174	3.80915	0.000210395	0.000480652	-5.21832	-2.97319	-6.74592	-5.47178	-4.96485	-2.6531	-2.7498	-3.51667	-7.41797	-7.49294	-5.32686
-1.1316	-0.704297	0.939229	1.36811	0.962105	-1.21469	-0.258626	0.0397673	ADGRE2	chr19	14732392	14736244	-	8642	adhesion G protein-coupled receptor E2	GO:0006954inflammatoryresponse//GO:0007155celladhesion//GO:0007166cellsurfacereceptorsignalingpathway//GO:0007186Gprotein-coupledreceptorsignalingpathway//GO:0007189adenylatecyclase-activatingGprotein-coupledreceptorsignalingpathway//GO:0016477cellmigration//GO:0043304regulationofmastcelldegranulation//GO:0071621granulocytechemotaxis	GO:0005886plasmamembrane//GO:0005887integralcomponentofplasmamembrane//GO:0016021integralcomponentofmembrane//GO:0031256leadingedgemembrane//GO:0032587rufflemembrane	GO:0004930Gprotein-coupledreceptoractivity//GO:0005509calciumionbinding//GO:0005515proteinbinding//GO:0035374chondroitinsulfatebinding	1.77363	0.826707	1.21644e-05	4.97752e-05	1.1434	0.193334	0.247598	0.333811	1.55119	0.633372	7.48496e-05	0.000183295	1.19225	2.02029	1.37375	1.10414	1.28036	1.95818	2.13506	1.96762	1.06987	1.46417	1.58723
-0.619774	-0.800733	-0.709521	-0.711039	-0.730474	1.37515	1.35218	0.844212	ADGRE5	chr19	14380501	14380616	+	5382	adhesion G protein-coupled receptor E5	GO:0006954inflammatoryresponse//GO:0006955immuneresponse//GO:0007155celladhesion//GO:0007166cellsurfacereceptorsignalingpathway//GO:0007186Gprotein-coupledreceptorsignalingpathway//GO:0007189adenylatecyclase-activatingGprotein-coupledreceptorsignalingpathway//GO:0007267cell-cellsignaling	GO:0005886plasmamembrane//GO:0005887integralcomponentofplasmamembrane//GO:0005925focaladhesion//GO:0016020membrane//GO:0030667secretorygranulemembrane//GO:0070062extracellularexosome	GO:0004888transmembranesignalingreceptoractivity//GO:0004930Gprotein-coupledreceptoractivity//GO:0005509calciumionbinding//GO:0005515proteinbinding	-1.00112	-0.00161561	0.970509	0.978463	1.37841	0.463005	2.9379e-10	2.12505e-09	-1.37995	-0.46462	3.00789e-11	2.06579e-10	6.77401	6.77236	7.23839	6.79612	6.75191	6.77419	6.77382	6.76907	7.28349	7.27788	7.15378
-0.52645	-0.752897	-0.585424	-0.902739	-0.828682	1.21262	1.2071	1.17648	ADGRF1	chr6	46997708	47000295	-	12383	adhesion G protein-coupled receptor F1	GO:0007166cellsurfacereceptorsignalingpathway//GO:0007186Gprotein-coupledreceptorsignalingpathway//GO:0007189adenylatecyclase-activatingGprotein-coupledreceptorsignalingpathway//GO:0007416synapseassembly//GO:0007613memory//GO:0031175neuronprojectiondevelopment//GO:0032793positiveregulationofCREBtranscriptionfactoractivity	GO:0005576extracellularregion//GO:0005886plasmamembrane//GO:0016021integralcomponentofmembrane	GO:0004930Gprotein-coupledreceptoractivity	-1.23966	-0.309942	0.543515	0.632114	26.245	4.71397	2.5546e-11	2.25268e-10	-32.5348	-5.02391	7.4626e-13	6.92611e-12	-2.72674	-3.06707	1.9914	-2.43616	-3.01732	-2.58751	-3.40188	-3.21182	2.02704	2.01288	1.9343
0.543277	0.815674	-0.612695	0.223051	0.269099	0.361478	0.637327	-2.23721	ADGRF3	chr2	26308173	26309107	-	5761	adhesion G protein-coupled receptor F3	GO:0007166cellsurfacereceptorsignalingpathway//GO:0007186Gprotein-coupledreceptorsignalingpathway	GO:0016021integralcomponentofmembrane	GO:0004930Gprotein-coupledreceptoractivity	-1.17416	-0.231634	0.474734	0.568663	-1.27625	-0.351914	0.310566	0.402164	1.08695	0.12028	0.706963	0.758167	-1.21342	-1.43074	-1.54327	-1.25455	-1.17229	-1.60363	-1.35125	-1.33735	-1.30945	-1.22615	-2.0942
-0.976725	-1.16655	-0.360719	-0.379743	-0.600898	1.12474	1.18949	1.17041	ADGRF4	chr6	47685864	47686015	+	3391	adhesion G protein-coupled receptor F4	GO:0007166cellsurfacereceptorsignalingpathway//GO:0007186Gprotein-coupledreceptorsignalingpathway	GO:0016021integralcomponentofmembrane	GO:0004930Gprotein-coupledreceptoractivity//GO:0005515proteinbinding	1.52217	0.606131	0.00184167	0.00463595	4.38702	2.13324	3.44164e-12	3.5706e-11	-2.88208	-1.52711	6.63392e-12	5.1381e-11	0.368299	0.964815	2.50135	0.458956	0.277643	1.04734	1.02917	0.817932	2.4662	2.52804	2.50982
-0.174167	-0.826938	-0.914097	-0.833178	-0.779246	1.15473	1.19479	1.1781	ADGRF5	chr6	46852522	46854071	-	6601	adhesion G protein-coupled receptor F5	GO:0003094glomerularfiltration//GO:0006112energyreservemetabolicprocess//GO:0007166cellsurfacereceptorsignalingpathway//GO:0007186Gprotein-coupledreceptorsignalingpathway//GO:0042593glucosehomeostasis//GO:0043031negativeregulationofmacrophageactivation//GO:0043129surfactanthomeostasis//GO:0045444fatcelldifferentiation//GO:0048821erythrocytedevelopment//GO:0061626pharyngealarcharterymorphogenesis/…	GO:0005886plasmamembrane//GO:0009986cellsurface//GO:0016021integralcomponentofmembrane//GO:0031410cytoplasmicvesicle//GO:0045177apicalpartofcell	GO:0004930Gprotein-coupledreceptoractivity//GO:0005515proteinbinding	-2.31129	-1.2087	0.328707	0.423555	59.9004	5.90449	3.07301e-06	1.15238e-05	-138.447	-7.11319	7.26777e-09	3.31334e-08	-6.62199	-7.8259	-0.714111	-5.47178	-7.77221	-8.07936	-7.7942	-7.60413	-0.788618	-0.647446	-0.706271
-1.62256	-1.59324	0.575209	0.581159	0.545259	0.481381	0.737655	0.295135	ADGRG1	chr16	57610652	57610912	+	9011	adhesion G protein-coupled receptor G1	GO:0001525angiogenesis//GO:0007155celladhesion//GO:0007166cellsurfacereceptorsignalingpathway//GO:0007186Gprotein-coupledreceptorsignalingpathway//GO:0007189adenylatecyclase-activatingGprotein-coupledreceptorsignalingpathway//GO:0007266Rhoproteinsignaltransduction//GO:0007267cell-cellsignaling//GO:0007420braindevelopment//GO:0008285negativeregulationofcellpopulationproliferation//GO:0010573vascul…	GO:0005887integralcomponentofplasmamembrane//GO:0016021integralcomponentofmembrane//GO:0045121membraneraft//GO:0070062extracellularexosome//GO:0097451gliallimitingend-foot	GO:0004930Gprotein-coupledreceptoractivity//GO:0005515proteinbinding//GO:0005518collagenbinding//GO:0008201heparinbinding//GO:0050840extracellularmatrixbinding	1.82878	0.870881	8.27901e-16	6.91824e-14	1.79596	0.844757	2.06337e-15	3.93169e-14	1.01827	0.0261246	0.480361	0.553373	7.23119	8.10187	8.07685	7.22532	7.23705	8.10507	8.10745	8.09308	8.06751	8.17009	7.99296
-0.492745	-0.803082	0.771371	1.35087	1.01956	-1.61779	-0.0447707	-0.183408	ADGRG2	chrX	18989307	18991048	-	10157	adhesion G protein-coupled receptor G2	GO:0007166cellsurfacereceptorsignalingpathway//GO:0007186Gprotein-coupledreceptorsignalingpathway//GO:0007189adenylatecyclase-activatingGprotein-coupledreceptorsignalingpathway//GO:0007283spermatogenesis	GO:0005829cytosol//GO:0005886plasmamembrane//GO:0005887integralcomponentofplasmamembrane//GO:0009986cellsurface//GO:0016021integralcomponentofmembrane//GO:0016324apicalplasmamembrane//GO:0070062extracellularexosome	GO:0004930Gprotein-coupledreceptoractivity	3.69697	1.88634	0.000205315	0.000637502	1.04791	0.0675193	0.897165	0.923322	3.52793	1.81882	8.99984e-05	0.000217931	-2.24022	-0.334586	-2.20359	-2.06579	-2.41465	-0.644734	0.00670463	-0.365728	-3.33051	-1.5622	-1.71805
0.398011	-2.3625	0.791416	0.397733	0.0664276	0.667385	-0.0910053	0.13253	ADGRG3	chr16	57668277	57668405	+	3240	adhesion G protein-coupled receptor G3	GO:0007166cellsurfacereceptorsignalingpathway//GO:0007186Gprotein-coupledreceptorsignalingpathway//GO:0007189adenylatecyclase-activatingGprotein-coupledreceptorsignalingpathway//GO:0030183Bcelldifferentiation//GO:0030334regulationofcellmigration//GO:0032792negativeregulationofCREBtranscriptionfactoractivity//GO:1901223negativeregulationofNIK/NF-kappaBsignaling	GO:0005886plasmamembrane//GO:0005887integralcomponentofplasmamembrane//GO:0016021integralcomponentofmembrane//GO:0035579specificgranulemembrane	GO:0004930Gprotein-coupledreceptoractivity//GO:0005515proteinbinding	5.66304	2.50158	0.0217105	0.042109	4.31324	2.10877	0.0561752	0.0928042	1.31294	0.392806	0.539387	0.609486	-5.35397	-2.89979	-3.21904	-2.93573	-7.77221	-2.24647	-2.93621	-3.51667	-2.46378	-3.7925	-3.40086
0.378623	0.468976	0.831306	0.975997	0.870157	-0.95173	-1.18896	-1.38437	ADGRG5	chr16	57542643	57542701	+	5630	adhesion G protein-coupled receptor G5	GO:0007166cellsurfacereceptorsignalingpathway//GO:0007186Gprotein-coupledreceptorsignalingpathway//GO:0007189adenylatecyclase-activatingGprotein-coupledreceptorsignalingpathway	GO:0005887integralcomponentofplasmamembrane//GO:0016021integralcomponentofmembrane	GO:0004930Gprotein-coupledreceptoractivity	1.46696	0.552831	0.000426834	0.00123925	-3.75449	-1.90862	4.8048e-09	2.83914e-08	5.50769	2.46145	8.60113e-12	6.55786e-11	1.29055	1.84652	-0.606033	1.23696	1.34414	1.77395	1.94559	1.82003	-0.341159	-0.622571	-0.854369
-0.606019	-0.440671	-0.0576331	-0.165002	-0.703827	-0.342689	-0.0898038	2.40565	ADGRG6	chr6	142301854	142302331	+	8473	adhesion G protein-coupled receptor G6	GO:0006508proteolysis//GO:0007166cellsurfacereceptorsignalingpathway//GO:0007186Gprotein-coupledreceptorsignalingpathway//GO:0007189adenylatecyclase-activatingGprotein-coupledreceptorsignalingpathway//GO:0007399nervoussystemdevelopment//GO:0014037Schwanncelldifferentiation//GO:0019933cAMP-mediatedsignaling//GO:0022011myelinationinperipheralnervoussystem//GO:0042552myelination//GO:0060347hearttrab…	GO:0005737cytoplasm//GO:0005789endoplasmicreticulummembrane//GO:0005886plasmamembrane//GO:0005887integralcomponentofplasmamembrane//GO:0009986cellsurface//GO:0016021integralcomponentofmembrane	GO:0004175endopeptidaseactivity//GO:0004930Gprotein-coupledreceptoractivity//GO:0005518collagenbinding//GO:0043236lamininbinding//GO:0050840extracellularmatrixbinding	1.01107	0.0158873	0.75787	0.816665	1.06031	0.0844875	0.116	0.174273	-1.0487	-0.0686002	0.151093	0.203143	5.94112	5.95602	6.02314	5.93538	5.94686	5.97346	5.966	5.92859	5.95367	5.97123	6.14451
1.07002	1.05476	0.523069	0.379169	0.474115	-1.1109	-1.12559	-1.26465	ADGRL1	chr19	14147743	14151615	-	8487	adhesion G protein-coupled receptor L1	GO:0007157heterophiliccell-celladhesionviaplasmamembranecelladhesionmolecules//GO:0007166cellsurfacereceptorsignalingpathway//GO:0007186Gprotein-coupledreceptorsignalingpathway//GO:0007189adenylatecyclase-activatingGprotein-coupledreceptorsignalingpathway//GO:0035584calcium-mediatedsignalingusingintracellularcalciumsource//GO:0090129positiveregulationofsynapsematuration	GO:0005886plasmamembrane//GO:0005887integralcomponentofplasmamembrane//GO:0014069postsynapticdensity//GO:0016021integralcomponentofmembrane//GO:0030424axon//GO:0030426growthcone//GO:0042734presynapticmembrane//GO:0043005neuronprojection//GO:0045202synapse	GO:0004930Gprotein-coupledreceptoractivity//GO:0005515proteinbinding//GO:0016524latrotoxinreceptoractivity//GO:0030246carbohydratebinding//GO:0050839celladhesionmoleculebinding	-1.13153	-0.178281	6.78532e-05	0.00023437	-1.58041	-0.660298	2.41215e-14	3.70282e-13	1.3967	0.482017	2.12369e-12	1.80282e-11	7.3139	7.13527	6.65411	7.31616	7.31165	7.1543	7.11171	7.13981	6.67073	6.66638	6.62523
1.14279	1.64932	0.0352492	-0.255005	0.013312	-1.5281	-0.448097	-0.609471	ADGRL1-AS1	chr19	14137146	14137223	+	3219	ADGRL1 antisense RNA 1				-1.82135	-0.865007	7.95707e-07	4.27327e-06	-2.50793	-1.3265	6.67514e-09	3.83487e-08	1.37696	0.461489	0.00505848	0.00926024	2.73682	1.8688	1.39886	2.58675	2.8869	1.93047	1.75847	1.91747	1.00409	1.64406	1.54843
-1.25177	-1.24594	1.09078	1.15666	1.05733	-0.289355	-0.165701	-0.352005	ADGRL2	chr1	81306147	81306509	+	24178	adhesion G protein-coupled receptor L2	GO:0007166cellsurfacereceptorsignalingpathway//GO:0007186Gprotein-coupledreceptorsignalingpathway//GO:0007189adenylatecyclase-activatingGprotein-coupledreceptorsignalingpathway//GO:0007420braindevelopment//GO:0009617responsetobacterium//GO:0050808synapseorganization//GO:0051965positiveregulationofsynapseassembly	GO:0005887integralcomponentofplasmamembrane//GO:0016021integralcomponentofmembrane//GO:0043005neuronprojection//GO:0098978glutamatergicsynapse//GO:0099055integralcomponentofpostsynapticmembrane	GO:0004930Gprotein-coupledreceptoractivity//GO:0016524latrotoxinreceptoractivity//GO:0030246carbohydratebinding	405.233	8.66261	8.12432e-09	7.0799e-08	12.1498	3.60286	0.00289372	0.00649074	33.3531	5.05975	8.76036e-10	4.62363e-09	-7.78296	0.876349	-4.17314	-7.79371	-7.77221	0.836517	1.07925	0.71328	-4.24805	-3.7925	-4.47886
-0.930132	-0.921611	1.37719	0.81014	1.20924	-0.781246	-0.81095	0.0473631	ADGRL3	chr4	61200326	61201765	+	14923	adhesion G protein-coupled receptor L3	GO:0001764neuronmigration//GO:0007166cellsurfacereceptorsignalingpathway//GO:0007186Gprotein-coupledreceptorsignalingpathway//GO:0007189adenylatecyclase-activatingGprotein-coupledreceptorsignalingpathway//GO:0007416synapseassembly//GO:0007420braindevelopment//GO:0098742cell-celladhesionviaplasma-membraneadhesionmolecules	GO:0005887integralcomponentofplasmamembrane//GO:0005911cell-celljunction//GO:0016021integralcomponentofmembrane//GO:0030424axon//GO:0098978glutamatergicsynapse	GO:0004930Gprotein-coupledreceptoractivity//GO:0005509calciumionbinding//GO:0005515proteinbinding//GO:0030246carbohydratebinding	37.4035	5.2251	7.67601e-05	0.000262649	2.05201	1.03704	0.444357	0.538573	18.2278	4.18807	0.000121117	0.000287291	-7.78296	-2.58913	-6.74592	-7.79371	-7.77221	-1.97084	-3.40188	-2.39468	-7.41797	-7.49294	-5.32686
0.469275	0.788301	0.881635	0.656748	0.763377	-1.45219	-1.19165	-0.915498	ADGRV1	chr5	90529344	90529515	+	33822	adhesion G protein-coupled receptor V1	GO:0007166cellsurfacereceptorsignalingpathway//GO:0007186Gprotein-coupledreceptorsignalingpathway//GO:0007194negativeregulationofadenylatecyclaseactivity//GO:0007399nervoussystemdevelopment//GO:0007601visualperception//GO:0007605sensoryperceptionofsound//GO:0010739positiveregulationofproteinkinaseAsignaling//GO:0030501positiveregulationofbonemineralization//GO:0031647regulationofproteinstability/…	GO:0001917photoreceptorinnersegment//GO:0002141stereociliaanklelink//GO:0002142stereociliaanklelinkcomplex//GO:0005737cytoplasm//GO:0005886plasmamembrane//GO:0009986cellsurface//GO:0016020membrane//GO:0016021integralcomponentofmembrane//GO:0043235receptorcomplex//GO:0045202synapse//GO:0060171stereociliummembrane//GO:0070062extracellularexosome//GO:1990075periciliarymembranecompartment//GO:1990696…	GO:0001965G-proteinalpha-subunitbinding//GO:0004930Gprotein-coupledreceptoractivity//GO:0005509calciumionbinding//GO:0005515proteinbinding//GO:0010855adenylatecyclaseinhibitoractivity//GO:0016787hydrolaseactivity	1.07202	0.10033	0.187719	0.267554	-2.38767	-1.2556	2.64615e-12	2.81913e-11	2.55962	1.35593	1.09469e-13	1.21703e-12	4.51248	4.60893	3.24794	4.40136	4.6236	4.68862	4.53195	4.60623	3.06282	3.24431	3.43669
-0.679533	-2.22328	0.603744	0.399339	0.135324	0.520055	0.557822	0.686533	ADH1A	chr4	99276369	99276648	-	2231	alcohol dehydrogenase 1A (class I), alpha polypeptide	GO:0006066alcoholmetabolicprocess//GO:0006069ethanoloxidation//GO:0042572retinolmetabolicprocess//GO:0042573retinoicacidmetabolicprocess	GO:0005654nucleoplasm//GO:0005829cytosol//GO:0005886plasmamembrane	GO:0004024alcoholdehydrogenaseactivity,zinc-dependent//GO:0004745NAD-retinoldehydrogenaseactivity//GO:0005515proteinbinding//GO:0008270zincionbinding	4.65302	2.21817	0.0102486	0.0216246	5.45774	2.4483	0.00536184	0.0113772	-1.17294	-0.230134	0.634094	0.696201	-5.26076	-3.06316	-2.81269	-4.33428	-6.18724	-2.79396	-3.03931	-3.35621	-2.89441	-2.84908	-2.69459
-0.97696	-0.968993	0.847344	0.953001	1.32461	-0.837748	-0.865522	0.524267	ADH1B	chr4	99304971	99307864	-	10770	alcohol dehydrogenase 1B (class I), beta polypeptide	GO:0001523retinoidmetabolicprocess//GO:0006069ethanoloxidation//GO:0042572retinolmetabolicprocess//GO:0042573retinoicacidmetabolicprocess	GO:0005654nucleoplasm//GO:0005829cytosol//GO:0005886plasmamembrane	GO:0004024alcoholdehydrogenaseactivity,zinc-dependent//GO:0004745NAD-retinoldehydrogenaseactivity//GO:0008270zincionbinding	41.5664	5.37734	0.00010622	0.000351567	3.09201	1.62854	0.257314	0.344447	13.4432	3.7488	0.000521301	0.00112158	-7.78296	-2.34547	-6.2176	-7.79371	-7.77221	-2.86991	-2.58474	-1.58177	-7.41797	-7.49294	-3.74189
-0.556272	-0.15922	1.16399	1.12302	1.18068	-0.842117	-0.70828	-1.2018	ADH1C	chr4	99336497	99336776	-	1574	alcohol dehydrogenase 1C (class I), gamma polypeptide	GO:0006069ethanoloxidation//GO:0042572retinolmetabolicprocess//GO:0042573retinoicacidmetabolicprocess	GO:0005654nucleoplasm//GO:0005829cytosol//GO:0005886plasmamembrane	GO:0004022alcoholdehydrogenase(NAD+)activity//GO:0004024alcoholdehydrogenaseactivity,zinc-dependent//GO:0004745NAD-retinoldehydrogenaseactivity//GO:0008270zincionbinding	6.06935	2.60154	4.96093e-07	2.78938e-06	-1.96458	-0.974223	0.0808914	0.12775	11.9237	3.57576	2.09075e-08	8.8384e-08	-2.4985	0.101488	-3.45983	-2.83951	-2.1575	0.115395	0.0450085	0.14406	-3.33051	-3.10062	-3.94835
0.86503	1.35088	-0.60336	1.01879	-1.64221	-0.335411	-0.296435	-0.357286	ADH5	chr4	99070978	99072441	-	4866	alcohol dehydrogenase 5 (class III), chi polypeptide	GO:0001523retinoidmetabolicprocess//GO:0003016respiratorysystemprocess//GO:0006069ethanoloxidation//GO:0010430fattyacidomega-oxidation//GO:0018119peptidyl-cysteineS-nitrosylation//GO:0022900electrontransportchain//GO:0032496responsetolipopolysaccharide//GO:0045777positiveregulationofbloodpressure//GO:0046294formaldehydecatabolicprocess//GO:0051409responsetonitrosativestress//GO:0051775responsetor…	GO:0005739mitochondrion//GO:0005829cytosol//GO:0070062extracellularexosome	GO:0004024alcoholdehydrogenaseactivity,zinc-dependent//GO:0005504fattyacidbinding//GO:0008270zincionbinding//GO:0009055electrontransferactivity//GO:0018467formaldehydedehydrogenaseactivity//GO:0042802identicalproteinbinding//GO:0051903S-(hydroxymethyl)glutathionedehydrogenaseactivity//GO:0106321S-(hydroxymethyl)glutathionedehydrogenaseNADPactivity//GO:0106322S-(hydroxymethyl)glutathionedehydrogen…	-1.07139	-0.0994884	0.0328746	0.060548	-1.0682	-0.0951754	0.0431868	0.0736167	-1.00299	-0.00431307	0.915044	0.931873	7.07788	6.97744	6.98268	7.06179	7.09396	6.96456	7.07197	6.89578	6.9823	6.98489	6.98086
0.195754	0.515214	0.406367	-0.614311	0.417559	-0.174132	1.31059	-2.05704	ADH5P4	chr6	65836930	65838039	-	1110	ADH5 pseudogene 4				-1.17848	-0.236927	0.721705	0.787203	-1.52241	-0.606354	0.40144	0.496417	1.29184	0.369427	0.582008	0.649407	-3.26487	-3.50898	-3.83098	-3.40139	-3.12835	-3.22138	-4.09376	-3.21182	-3.71753	-2.44854	-5.32686
-0.241519	-0.178398	1.04539	1.06838	1.28744	-1.15199	-0.820271	-1.00903	ADH6	chr4	99202638	99205063	-	4401	alcohol dehydrogenase 6 (class V)	GO:0006069ethanoloxidation//GO:0042572retinolmetabolicprocess//GO:0042573retinoicacidmetabolicprocess//GO:0045471responsetoethanol	GO:0005829cytosol//GO:0070062extracellularexosome	GO:0004022alcoholdehydrogenase(NAD+)activity//GO:0004024alcoholdehydrogenaseactivity,zinc-dependent//GO:0004745NAD-retinoldehydrogenaseactivity//GO:0008270zincionbinding	2.92881	1.55031	5.27898e-09	4.83118e-08	-1.87786	-0.90909	0.000727057	0.00183905	5.49989	2.4594	1.0891e-11	8.09427e-11	0.33575	1.89836	-0.575754	0.299048	0.372452	1.79562	1.82235	2.07711	-0.759763	-0.373995	-0.593503
-1.07771	-1.05114	0.914484	0.522218	1.11472	-0.060658	0.894421	-1.25634	ADHFE1	chr8	66432492	66432575	+	3378	alcohol dehydrogenase iron containing 1	GO:00061032-oxoglutaratemetabolicprocess//GO:0006539glutamatecatabolicprocessvia2-oxoglutarate	GO:0005739mitochondrion//GO:0005759mitochondrialmatrix	GO:0004022alcoholdehydrogenase(NAD+)activity//GO:0046872metalionbinding//GO:0047988hydroxyacid-oxoacidtranshydrogenaseactivity	2.91982	1.54588	0.0309562	0.0574522	1.64963	0.722144	0.333511	0.426683	1.76999	0.823737	0.135632	0.184351	-4.32353	-2.77362	-3.576	-4.33428	-4.31277	-2.72181	-3.03931	-2.55974	-3.51108	-2.73805	-4.47886
-0.416411	-0.881088	1.35976	1.39857	0.705796	-0.37551	-0.862798	-0.928317	ADI1	chr2	3497366	3499082	-	5350	acireductone dioxygenase 1	GO:0006555methioninemetabolicprocess//GO:0019509L-methioninesalvagefrommethylthioadenosine	GO:0005634nucleus//GO:0005737cytoplasm//GO:0005829cytosol//GO:0005886plasmamembrane	GO:0005506ironionbinding//GO:0005515proteinbinding//GO:0010309acireductonedioxygenase[iron(II)-requiring]activity//GO:0016491oxidoreductaseactivity	1.15102	0.202916	3.7095e-05	0.00013613	-1.00613	-0.00881363	0.829379	0.873601	1.15808	0.21173	5.89108e-06	1.702e-05	7.05696	7.25872	7.04874	7.08295	7.03097	7.28166	7.286	7.2085	7.08753	7.03301	7.02568
-1.61248	-1.52792	0.607357	0.239535	0.783677	0.733659	0.692626	0.0835442	ADIPOR1	chr1	202940826	202941701	-	3113	adiponectin receptor 1	GO:0009755hormone-mediatedsignalingpathway//GO:0010633negativeregulationofepithelialcellmigration//GO:0010719negativeregulationofepithelialtomesenchymaltransition//GO:0010906regulationofglucosemetabolicprocess//GO:0019216regulationoflipidmetabolicprocess//GO:0019395fattyacidoxidation//GO:0030308negativeregulationofcellgrowth//GO:0033210leptin-mediatedsignalingpathway//GO:0033211adiponectin-activa…	GO:0005886plasmamembrane//GO:0016020membrane//GO:0016021integralcomponentofmembrane//GO:0031226intrinsiccomponentofplasmamembrane	GO:0005515proteinbinding//GO:0019901proteinkinasebinding//GO:0038023signalingreceptoractivity//GO:0042802identicalproteinbinding//GO:0046872metalionbinding//GO:0055100adiponectinbinding//GO:0097003adipokinetichormonereceptoractivity	1.26288	0.336722	1.68542e-08	1.36329e-07	1.25669	0.329627	3.05148e-08	1.57899e-07	1.00493	0.007095	0.839734	0.871594	7.61474	7.95176	7.94534	7.608	7.62149	7.96193	7.90329	7.99005	7.98207	7.97553	7.87842
-0.0152303	-0.138011	1.1863	1.19225	0.900643	-0.979847	-1.27031	-0.875798	ADIPOR2	chr12	1688574	1688717	+	5831	adiponectin receptor 2	GO:0001934positiveregulationofproteinphosphorylation//GO:0007507heartdevelopment//GO:0007565femalepregnancy//GO:0007584responsetonutrient//GO:0009410responsetoxenobioticstimulus//GO:0009750responsetofructose//GO:0009755hormone-mediatedsignalingpathway//GO:0010629negativeregulationofgeneexpression//GO:0014075responsetoamine//GO:0019395fattyacidoxidation//GO:0030308negativeregulationofcellgrowth//G…	GO:0005886plasmamembrane//GO:0016021integralcomponentofmembrane//GO:0031226intrinsiccomponentofplasmamembrane	GO:0005515proteinbinding//GO:0038023signalingreceptoractivity//GO:0046872metalionbinding//GO:0055100adiponectinbinding//GO:0097003adipokinetichormonereceptoractivity	1.14743	0.198409	2.33342e-05	8.98042e-05	-1.11949	-0.162844	0.000331905	0.000888947	1.28454	0.361253	4.04991e-10	2.26275e-09	7.22956	7.42719	7.06644	7.23993	7.21918	7.44294	7.44395	7.39468	7.07694	7.02787	7.09452
-0.780395	-0.606368	-0.71402	-0.563042	-0.899661	0.921731	1.47587	1.16589	ADIRF-AS1	chr10	86965345	86967549	-	5748	ADIRF antisense RNA 1				-1.00587	-0.00843988	0.951562	0.964574	1.55949	0.641076	7.67224e-05	0.000228764	-1.56864	-0.649516	1.27654e-05	3.50268e-05	1.28301	1.27206	1.92283	1.25341	1.3126	1.27599	1.32734	1.21285	1.83232	2.02079	1.91536
1.65312	1.18133	0.174957	-0.130468	-0.730261	-0.0308341	-1.21248	-0.90536	ADK	chr10	74151202	74151343	+	4658	adenosine kinase	GO:0006166purineribonucleosidesalvage//GO:0006175dATPbiosyntheticprocess//GO:0009156ribonucleosidemonophosphatebiosyntheticprocess//GO:0016310phosphorylation//GO:0044209AMPsalvage	GO:0005634nucleus//GO:0005654nucleoplasm//GO:0005829cytosol//GO:0005886plasmamembrane	GO:0003723RNAbinding//GO:0004001adenosinekinaseactivity//GO:0005524ATPbinding//GO:0046872metalionbinding	-1.15083	-0.202674	0.000524552	0.00149561	-1.20359	-0.267339	3.11401e-05	9.9045e-05	1.04584	0.0646651	0.180394	0.237521	5.88304	5.67776	5.61694	5.91246	5.85362	5.72809	5.69	5.61519	5.70243	5.55504	5.59335
-0.849376	-0.680386	-0.530478	-0.971653	-0.552582	1.22456	1.19762	1.16229	ADM	chr11	10305073	10305229	+	2325	adrenomedullin	GO:0001570vasculogenesis//GO:0001666responsetohypoxia//GO:0001843neuraltubeclosure//GO:0002026regulationoftheforceofheartcontraction//GO:0002031Gprotein-coupledreceptorinternalization//GO:0003073regulationofsystemicarterialbloodpressure//GO:0006954inflammatoryresponse//GO:0007165signaltransduction//GO:0007189adenylatecyclase-activatingGprotein-coupledreceptorsignalingpathway//GO:0007204positivere…	GO:0005576extracellularregion//GO:0005615extracellularspace//GO:0005737cytoplasm	GO:0005102signalingreceptorbinding//GO:0005179hormoneactivity//GO:0031700adrenomedullinreceptorbinding	1.0316	0.0448883	0.694518	0.765432	2.04419	1.03153	1.76376e-09	1.12243e-08	-1.98156	-0.986638	2.47746e-10	1.44059e-09	2.02722	2.06934	3.05922	1.98272	2.07172	2.15066	1.91833	2.13902	3.07488	3.06069	3.04209
-1.14973	1.6781	0.19825	0.0156852	0.126087	-0.881851	-1.00047	1.01393	ADM-DT	chr11	10302657	10303050	-	803	ADM divergent transcript				-1.06223	-0.0870941	0.882869	0.91376	-1.24545	-0.316665	0.617851	0.699109	1.17249	0.229571	0.691908	0.745501	-2.9933	-3.08863	-3.34318	-3.88682	-2.09978	-3.03497	-3.15034	-3.08057	-3.71753	-3.7925	-2.5195
0.306633	0.343141	0.95343	0.974368	0.917444	-1.19373	-1.06359	-1.23769	ADM2	chr22	50481543	50481763	+	4289	adrenomedullin 2	GO:0001525angiogenesis//GO:0006468proteinphosphorylation//GO:0007189adenylatecyclase-activatingGprotein-coupledreceptorsignalingpathway//GO:0007586digestion//GO:0007631feedingbehavior//GO:0010628positiveregulationofgeneexpression//GO:0045766positiveregulationofangiogenesis//GO:0045776negativeregulationofbloodpressure	GO:0005576extracellularregion	GO:0005179hormoneactivity//GO:0044877protein-containingcomplexbinding	1.6435	0.716771	6.10517e-13	1.81028e-11	-3.27761	-1.71264	2.16755e-18	8.0469e-17	5.38675	2.42942	1.34463e-22	1.55274e-20	5.40451	6.12044	3.69383	5.38355	5.42547	6.1262	6.15024	6.08488	3.66084	3.81027	3.61037
1.17549	0.944101	0.317492	0.182436	0.762707	-0.779893	-1.39272	-1.20962	ADM5	chr19	49689594	49689911	+	788	adrenomedullin 5 (putative)	GO:0008150biological_process	GO:0005575cellular_component//GO:0005576extracellularregion	GO:0003674molecular_function	-1.42673	-0.51271	0.00849158	0.0182969	-3.27416	-1.71113	2.37858e-07	1.06831e-06	2.29488	1.19842	2.89386e-05	7.54319e-05	0.860975	0.363139	-0.843265	0.951124	0.770826	0.282582	0.177348	0.629487	-0.572484	-1.04999	-0.907318
0.755241	0.613619	0.772793	0.582313	0.881901	-1.23323	-1.14464	-1.228	ADNP	chr20	50888916	50894512	-	8482	activity dependent neuroprotector homeobox	GO:0006357regulationoftranscriptionbyRNApolymeraseII//GO:0007614short-termmemory//GO:0009743responsetocarbohydrate//GO:0010035responsetoinorganicsubstance//GO:0010468regulationofgeneexpression//GO:0010629negativeregulationofgeneexpression//GO:0010835regulationofproteinADP-ribosylation//GO:0010976positiveregulationofneuronprojectiondevelopment//GO:0019934cGMP-mediatedsignaling//GO:0031668cellularr…	GO:0000785chromatin//GO:0005615extracellularspace//GO:0005634nucleus//GO:0005737cytoplasm//GO:0030424axon//GO:0030425dendrite//GO:0043025neuronalcellbody//GO:0090575RNApolymeraseIItranscriptionregulatorcomplex	GO:0000981DNA-bindingtranscriptionfactoractivity,RNApolymeraseII-specific//GO:0003677DNAbinding//GO:0003682chromatinbinding//GO:0005507copperionbinding//GO:0005515proteinbinding//GO:0042277peptidebinding//GO:0048487beta-tubulinbinding	1.00689	0.00990899	0.784524	0.838373	-1.24226	-0.312968	2.22217e-08	1.17934e-07	1.25082	0.322877	1.94089e-09	9.6792e-09	7.34909	7.35924	7.03617	7.36083	7.33734	7.36374	7.33215	7.38184	7.03098	7.04568	7.03185
-0.446807	0.938553	-0.395577	-1.65805	-0.689836	0.00792254	1.22342	1.02038	ADNP-AS1	chr20	50930984	50931054	+	1049	ADNP antisense RNA 1				-1.16651	-0.222202	0.295385	0.387573	1.07462	0.103823	0.62089	0.701719	-1.25355	-0.326025	0.101751	0.14275	0.0633638	-0.164417	0.162437	-0.0726103	0.199338	-0.0625538	-0.310379	-0.120317	0.0166538	0.255257	0.215401
0.599397	0.693425	0.943371	0.748758	0.60506	-1.18531	-1.04913	-1.35556	ADNP2	chr18	80109262	80109472	+	5657	ADNP homeobox 2	GO:0006357regulationoftranscriptionbyRNApolymeraseII//GO:0010468regulationofgeneexpression//GO:0030182neurondifferentiation//GO:0030307positiveregulationofcellgrowth//GO:0034599cellularresponsetooxidativestress//GO:0060548negativeregulationofcelldeath//GO:0071300cellularresponsetoretinoicacid	GO:0000785chromatin//GO:0005575cellular_component//GO:0005634nucleus	GO:0000981DNA-bindingtranscriptionfactoractivity,RNApolymeraseII-specific//GO:0003674molecular_function//GO:0003677DNAbinding//GO:0005515proteinbinding//GO:0046872metalionbinding	1.02616	0.037255	0.421282	0.517455	-1.45461	-0.540629	1.50516e-10	1.14798e-09	1.49266	0.577884	5.69578e-12	4.46416e-11	5.92602	5.96096	5.38626	5.91225	5.93978	6.01298	5.95599	5.91391	5.38958	5.42946	5.33972
-0.250256	-0.529984	1.24175	1.08374	1.19465	-0.891616	-0.994229	-0.854051	ADO	chr10	62804720	62808479	+	3760	2-aminoethanethiol dioxygenase		GO:0005829cytosol	GO:0005515proteinbinding//GO:0046872metalionbinding//GO:0047800cysteaminedioxygenaseactivity	1.27904	0.355063	4.18307e-08	3.05553e-07	-1.08572	-0.118651	0.0162921	0.0309467	1.38868	0.473714	5.06825e-11	3.3388e-10	5.74926	6.1041	5.63052	5.781	5.71752	6.11962	6.08376	6.10893	5.63544	5.61215	5.64397
-0.0198984	0.0775348	1.13779	0.99617	1.04264	-0.939871	-0.918954	-1.37541	ADORA1	chr1	203090654	203090734	+	4191	adenosine A1 receptor	GO:0001659temperaturehomeostasis//GO:0001666responsetohypoxia//GO:0001973Gprotein-coupledadenosinereceptorsignalingpathway//GO:0002087regulationofrespiratorygaseousexchangebynervoussystemprocess//GO:0002674negativeregulationofacuteinflammatoryresponse//GO:0002686negativeregulationofleukocytemigration//GO:0002793positiveregulationofpeptidesecretion//GO:0003084positiveregulationofsystemicarterialbl…	GO:0005783endoplasmicreticulum//GO:0005886plasmamembrane//GO:0005887integralcomponentofplasmamembrane//GO:0014069postsynapticdensity//GO:0016323basolateralplasmamembrane//GO:0030673axolemma//GO:0043025neuronalcellbody//GO:0043195terminalbouton//GO:0043197dendriticspine//GO:0044305calyxofHeld//GO:0048786presynapticactivezone//GO:0099055integralcomponentofpostsynapticmembrane//GO:0099056integralcom…	GO:0001609Gprotein-coupledadenosinereceptoractivity//GO:0001664Gprotein-coupledreceptorbinding//GO:0001883purinenucleosidebinding//GO:0005515proteinbinding//GO:0031072heatshockproteinbinding//GO:0031683G-proteinbeta/gamma-subunitcomplexbinding//GO:0032795heterotrimericG-proteinbinding//GO:0046982proteinheterodimerizationactivity//GO:0099582neurotransmitterreceptoractivityinvolvedinregulationofpre…	2.80035	1.48561	2.04862e-10	2.74503e-09	-3.04117	-1.60463	1.19944e-07	5.64126e-07	8.51636	3.09024	4.18401e-14	5.04982e-13	1.28461	2.76234	-0.303366	1.21472	1.3545	2.87556	2.67239	2.73905	-0.105091	-0.0750836	-0.729922
1.55167	1.50405	-0.557968	-0.689873	-1.0524	0.130307	-0.328697	-0.557088	ADORA2B	chr17	15945130	15945583	+	2338	adenosine A2b receptor	GO:0001973Gprotein-coupledadenosinereceptorsignalingpathway//GO:0006968cellulardefenseresponse//GO:0007186Gprotein-coupledreceptorsignalingpathway//GO:0007190activationofadenylatecyclaseactivity//GO:0007254JNKcascade//GO:0007588excretion	GO:0005886plasmamembrane//GO:0005887integralcomponentofplasmamembrane	GO:0001609Gprotein-coupledadenosinereceptoractivity//GO:0005515proteinbinding	-1.41865	-0.504521	4.43657e-09	4.14778e-08	-1.31623	-0.396411	3.42795e-07	1.49761e-06	-1.07782	-0.10811	0.0499434	0.0753613	5.24865	4.74074	4.85472	5.25393	5.24338	4.78695	4.75775	4.67751	4.9393	4.8377	4.78715
0.561761	0.944928	1.0891	0.382334	0.538798	-1.34732	-1.07901	-1.09059	ADPGK	chr15	72751294	72752895	-	6006	ADP dependent glucokinase	GO:0005975carbohydratemetabolicprocess//GO:0006006glucosemetabolicprocess//GO:0061620glycolyticprocessthroughglucose-6-phosphate	GO:0005576extracellularregion//GO:0005783endoplasmicreticulum//GO:0005789endoplasmicreticulummembrane//GO:0016020membrane	GO:0043843ADP-specificglucokinaseactivity//GO:0046872metalionbinding	-1.00666	-0.00958072	0.827533	0.872337	-1.20099	-0.264222	6.45955e-06	2.3082e-05	1.19304	0.254641	2.43661e-06	7.44494e-06	6.24184	6.23039	5.97718	6.21551	6.26817	6.28798	6.19085	6.21235	5.95312	5.99	5.98841
0.369307	-1.40914	1.45724	-0.255775	0.695706	-0.132902	-1.34326	0.618827	ADPGK-AS1	chr15	72782835	72785196	+	5050	ADPGK antisense RNA 1				1.61702	0.693339	0.258652	0.347571	1.10694	0.146573	0.823734	0.871018	1.46081	0.546766	0.317872	0.388424	-3.55529	-2.88602	-3.4193	-3.03882	-4.07177	-2.40694	-3.40188	-2.84925	-3.33051	-4.0335	-2.8939
-2.27933	0.208108	0.176764	0.73968	1.05551	0.235934	-0.0244202	-0.11225	ADPRH	chr3	119579268	119580636	+	4615	ADP-ribosylarginine hydrolase	GO:0006464cellularproteinmodificationprocess//GO:0006886intracellularproteintransport//GO:0051725proteinde-ADP-ribosylation//GO:0090630activationofGTPaseactivity//GO:2000785regulationofautophagosomeassembly	GO:0005615extracellularspace//GO:0005776autophagosome//GO:0005829cytosol//GO:0055037recyclingendosome	GO:0000287magnesiumionbinding//GO:0003875ADP-ribosylargininehydrolaseactivity//GO:0005096GTPaseactivatoractivity//GO:0005515proteinbinding//GO:0030955potassiumionbinding	7.66078	2.93749	0.00831302	0.0179576	3.71974	1.8952	0.0947789	0.146146	2.05949	1.04229	0.117204	0.162104	-5.5868	-2.58279	-3.69045	-7.79371	-3.37989	-3.43551	-2.43664	-1.87621	-3.33051	-3.7925	-3.94835
-1.24288	-1.09343	-0.260496	-0.36403	-0.19235	1.43409	0.365557	1.35353	ADPRHL1	chr13	113399611	113408220	-	11007	ADP-ribosylhydrolase like 1	GO:0051725proteinde-ADP-ribosylation		GO:0000287magnesiumionbinding//GO:0003875ADP-ribosylargininehydrolaseactivity	1.09329	0.128679	0.10673	0.167177	1.24827	0.319935	0.000442019	0.00115848	-1.14176	-0.191255	0.00967352	0.0168829	3.27436	3.40326	3.59367	3.26361	3.28511	3.40496	3.39006	3.41476	3.64879	3.49504	3.6372
-0.617616	-0.613715	1.10992	1.64906	0.642881	-0.385085	-1.15263	-0.632808	ADPRM	chr17	10697594	10697667	+	1945	ADP-ribose/CDP-alcohol diphosphatase, manganese dependent		GO:0005829cytosol	GO:00086632',3'-cyclic-nucleotide2'-phosphodiesteraseactivity//GO:0030145manganeseionbinding//GO:0047631ADP-ribosediphosphataseactivity//GO:0047734CDP-glyceroldiphosphataseactivity	1.35401	0.437241	3.49217e-05	0.000129061	-1.01903	-0.0271941	0.770392	0.828743	1.37978	0.464435	5.79187e-06	1.67481e-05	3.15879	3.59237	3.13206	3.1583	3.15927	3.58642	3.72003	3.47068	3.21593	3.02572	3.15454
-0.846453	-0.445707	1.40428	0.689201	1.35745	-0.417024	-0.64234	-1.0994	ADPRS	chr1	36088892	36089115	+	1651	ADP-ribosylserine hydrolase	GO:0006281DNArepair//GO:0006287base-excisionrepair,gap-filling//GO:0071451cellularresponsetosuperoxide//GO:0140290peptidyl-serineADP-deribosylation	GO:0005634nucleus//GO:0005654nucleoplasm//GO:0005739mitochondrion//GO:0005759mitochondrialmatrix//GO:0016604nuclearbody//GO:0090734siteofDNAdamage	GO:0000287magnesiumionbinding//GO:0004553hydrolaseactivity,hydrolyzingO-glycosylcompounds//GO:0004649poly(ADP-ribose)glycohydrolaseactivity//GO:0005515proteinbinding//GO:0061463O-acetyl-ADP-ribosedeacetylaseactivity//GO:0140292ADP-ribosylserinehydrolaseactivity	1.21399	0.279756	0.000145802	0.000468672	-1.00934	-0.0134066	0.837507	0.878448	1.22532	0.293163	3.17191e-05	8.21671e-05	4.22287	4.50167	4.21147	4.19178	4.25397	4.54109	4.43011	4.53382	4.25842	4.22345	4.15252
-0.789823	-0.781155	1.3088	1.24338	1.05714	-0.638364	-0.668581	-0.731404	ADRA1A	chr8	26748150	26748748	-	6749	adrenoceptor alpha 1A	GO:0001985negativeregulationofheartrateinvolvedinbaroreceptorresponsetoincreasedsystemicarterialbloodpressure//GO:0001994norepinephrine-epinephrinevasoconstrictioninvolvedinregulationofsystemicarterialbloodpressure//GO:0001996positiveregulationofheartratebyepinephrine-norepinephrine//GO:0001997positiveregulationoftheforceofheartcontractionbyepinephrine-norepinephrine//GO:0003084positiveregulation…	GO:0005634nucleus//GO:0005654nucleoplasm//GO:0005737cytoplasm//GO:0005829cytosol//GO:0005886plasmamembrane//GO:0005887integralcomponentofplasmamembrane//GO:0005901caveola//GO:0030018Zdisc//GO:0030315T-tubule//GO:0031965nuclearmembrane//GO:0043231intracellularmembrane-boundedorganelle//GO:0098691dopaminergicsynapse//GO:0098978glutamatergicsynapse//GO:0098982GABA-ergicsynapse//GO:0099055integralcom…	GO:0004930Gprotein-coupledreceptoractivity//GO:0004937alpha1-adrenergicreceptoractivity//GO:0005515proteinbinding//GO:0046982proteinheterodimerizationactivity	31.1424	4.96081	3.84076e-05	0.000140275	1.20002	0.263059	0.826409	0.872062	25.9516	4.69775	7.61252e-06	2.15997e-05	-7.78296	-2.84971	-7.5199	-7.79371	-7.77221	-2.58751	-2.7498	-3.21182	-7.41797	-7.49294	-7.64879
-1.56951	-1.62641	0.342379	0.356814	0.402923	0.707898	0.800288	0.585623	ADRA2A	chr10	111077029	111080907	+	3879	adrenoceptor alpha 2A	GO:0001819positiveregulationofcytokineproduction//GO:0006940regulationofsmoothmusclecontraction//GO:0007186Gprotein-coupledreceptorsignalingpathway//GO:0007189adenylatecyclase-activatingGprotein-coupledreceptorsignalingpathway//GO:0007193adenylatecyclase-inhibitingGprotein-coupledreceptorsignalingpathway//GO:0007265Rasproteinsignaltransduction//GO:0007266Rhoproteinsignaltransduction//GO:0008284po…	GO:0005737cytoplasm//GO:0005886plasmamembrane//GO:0005887integralcomponentofplasmamembrane//GO:0016323basolateralplasmamembrane//GO:0043235receptorcomplex//GO:0098691dopaminergicsynapse	GO:0004930Gprotein-coupledreceptoractivity//GO:0004938alpha2-adrenergicreceptoractivity//GO:0005515proteinbinding//GO:0019901proteinkinasebinding//GO:0031692alpha-1Badrenergicreceptorbinding//GO:0031696alpha-2Cadrenergicreceptorbinding//GO:0031996thioesterasebinding//GO:0032795heterotrimericG-proteinbinding//GO:0042803proteinhomodimerizationactivity//GO:0046982proteinheterodimerizationactivity//G…	2.5907	1.37334	4.63088e-19	1.54228e-16	3.04031	1.60422	1.73219e-20	1.115e-18	-1.17355	-0.23088	3.56563e-06	1.06289e-05	5.77406	7.14821	7.37934	5.79395	5.75417	7.13074	7.14083	7.17307	7.38631	7.45091	7.30081
-0.667492	-0.870549	1.18666	1.17826	1.23596	-0.862278	-0.664862	-0.5357	ADRA2C	chr4	3766348	3767616	+	2179	adrenoceptor alpha 2C	GO:0007186Gprotein-coupledreceptorsignalingpathway//GO:0007267cell-cellsignaling//GO:0007565femalepregnancy//GO:0010700negativeregulationofnorepinephrinesecretion//GO:0030168plateletactivation//GO:0032148activationofproteinkinaseBactivity//GO:0032811negativeregulationofepinephrinesecretion//GO:0035624receptortransactivation//GO:0043410positiveregulationofMAPKcascade//GO:0045666positiveregulationo…	GO:0005737cytoplasm//GO:0005768endosome//GO:0005886plasmamembrane//GO:0005887integralcomponentofplasmamembrane//GO:0043025neuronalcellbody//GO:0043679axonterminus//GO:0098978glutamatergicsynapse//GO:0099061integralcomponentofpostsynapticdensitymembrane	GO:0004930Gprotein-coupledreceptoractivity//GO:0004938alpha2-adrenergicreceptoractivity//GO:0005515proteinbinding//GO:0031694alpha-2Aadrenergicreceptorbinding//GO:0042803proteinhomodimerizationactivity//GO:0046982proteinheterodimerizationactivity//GO:0051379epinephrinebinding	32.4236	5.01897	6.98577e-16	5.99004e-14	1.1695	0.225892	0.475447	0.568045	27.7243	4.79308	4.24259e-17	9.71062e-16	-0.913226	4.11182	-0.705501	-0.654158	-1.17229	4.07704	4.0556	4.20282	-1.15119	-0.647446	-0.317868
0.427044	-0.632812	0.972728	1.10639	0.889923	-1.28832	-1.33221	-0.142735	ADRB1	chr10	114043866	114046904	+	3039	adrenoceptor beta 1	GO:0001996positiveregulationofheartratebyepinephrine-norepinephrine//GO:0001997positiveregulationoftheforceofheartcontractionbyepinephrine-norepinephrine//GO:0002024dietinducedthermogenesis//GO:0002025norepinephrine-epinephrine-mediatedvasodilationinvolvedinregulationofsystemicarterialbloodpressure//GO:0007190activationofadenylatecyclaseactivity//GO:0009409responsetocold//GO:0031649heatgeneration…	GO:0005769earlyendosome//GO:0005886plasmamembrane//GO:0005887integralcomponentofplasmamembrane//GO:0098685Schaffercollateral-CA1synapse	GO:0004930Gprotein-coupledreceptoractivity//GO:0004939beta-adrenergicreceptoractivity//GO:0004940beta1-adrenergicreceptoractivity//GO:0005085guanyl-nucleotideexchangefactoractivity//GO:0005515proteinbinding//GO:0030165PDZdomainbinding//GO:0031694alpha-2Aadrenergicreceptorbinding//GO:0046982proteinheterodimerizationactivity//GO:0099579Gprotein-coupledneurotransmitterreceptoractivityinvolvedinregul…	3.64138	1.86448	0.000334422	0.000990976	-2.56675	-1.35994	0.0510173	0.0853135	9.34652	3.22443	7.0987e-06	2.02217e-05	-2.22316	-0.356921	-3.62076	-1.31798	-3.12835	-0.385875	-0.157571	-0.527317	-4.24805	-4.32301	-2.29123
-1.6838	-0.560211	0.101122	-0.735764	-0.21982	0.947693	0.933925	1.21686	ADRB2	chr5	148826611	148828623	+	2013	adrenoceptor beta 2	GO:0002024dietinducedthermogenesis//GO:0002025norepinephrine-epinephrine-mediatedvasodilationinvolvedinregulationofsystemicarterialbloodpressure//GO:0002028regulationofsodiumiontransport//GO:0002032desensitizationofGprotein-coupledreceptorsignalingpathwaybyarrestin//GO:0006898receptor-mediatedendocytosis//GO:0007166cellsurfacereceptorsignalingpathway//GO:0007171activationoftransmembranereceptorpr…	GO:0005634nucleus//GO:0005764lysosome//GO:0005768endosome//GO:0005769earlyendosome//GO:0005794Golgiapparatus//GO:0005886plasmamembrane//GO:0005887integralcomponentofplasmamembrane//GO:0010008endosomemembrane//GO:0016020membrane//GO:0016324apicalplasmamembrane//GO:0030669clathrin-coatedendocyticvesiclemembrane//GO:0043235receptorcomplex	GO:0001540amyloid-betabinding//GO:0004930Gprotein-coupledreceptoractivity//GO:0004941beta2-adrenergicreceptoractivity//GO:0005515proteinbinding//GO:0008179adenylatecyclasebinding//GO:0015459potassiumchannelregulatoractivity//GO:0042802identicalproteinbinding//GO:0042803proteinhomodimerizationactivity//GO:0044877protein-containingcomplexbinding//GO:0051380norepinephrinebinding	3.0366	1.60246	0.0510551	0.088943	16.3487	4.03111	1.04159e-05	3.59881e-05	-5.38388	-2.42865	6.11831e-06	1.76211e-05	-4.42583	-2.86717	-0.413986	-5.47178	-3.37989	-2.14862	-3.70673	-2.74615	-0.572484	-0.598118	-0.0713562
0.533883	0.0164219	-0.508756	-1.50753	0.30726	0.820101	1.46525	-1.12663	ADRM1	chr20	62302093	62302142	+	2142	ADRM1 26S proteasome ubiquitin receptor	GO:0006368transcriptionelongationfromRNApolymeraseIIpromoter//GO:0006511ubiquitin-dependentproteincatabolicprocess//GO:0010950positiveregulationofendopeptidaseactivity//GO:0043248proteasomeassembly	GO:0000502proteasomecomplex//GO:0005654nucleoplasm//GO:0005829cytosol//GO:0005886plasmamembrane//GO:0008541proteasomeregulatoryparticle,lidsubcomplex	GO:0002020proteasebinding//GO:0005515proteinbinding//GO:0043130ubiquitinbinding//GO:0061133endopeptidaseactivatoractivity//GO:0070628proteasomebinding	-1.03837	-0.0543223	0.263839	0.353425	1.00382	0.00550613	0.909692	0.93284	-1.04234	-0.0598284	0.178858	0.235729	6.63589	6.58239	6.64293	6.65228	6.61951	6.58625	6.52301	6.63792	6.6704	6.71125	6.54713
0.170913	0.866225	1.15116	0.652846	0.605411	-1.08536	-1.44225	-0.918951	ADSL	chr22	40346461	40346711	+	12109	adenylosuccinate lyase	GO:0001666responsetohypoxia//GO:0006164purinenucleotidebiosyntheticprocess//GO:0006167AMPbiosyntheticprocess//GO:0006189'denovo'IMPbiosyntheticprocess//GO:0007584responsetonutrient//GO:0009060aerobicrespiration//GO:0014850responsetomuscleactivity//GO:0042594responsetostarvation//GO:0044208'denovo'AMPbiosyntheticprocess	GO:0005829cytosol//GO:0032991protein-containingcomplex	GO:0004018N6-(1,2-dicarboxyethyl)AMPAMP-lyase(fumarate-forming)activity//GO:0042802identicalproteinbinding//GO:0070626(S)-2-(5-amino-1-(5-phospho-D-ribosyl)imidazole-4-carboxamido)succinateAMP-lyase(fumarate-forming)activity	1.03916	0.0554227	0.398712	0.495182	-1.22972	-0.298335	0.000285477	0.000773341	1.27788	0.353758	1.02579e-05	2.8552e-05	4.09493	4.14608	3.79522	4.03244	4.15742	4.20864	4.11907	4.11054	3.80663	3.74248	3.83654
-1.53689	-1.43573	0.531396	-0.0771047	0.00925316	0.809782	1.15679	0.542504	ADSS1	chr14	104724229	104724462	+	5732	adenylosuccinate synthase 1	GO:0002376immunesystemprocess//GO:0006167AMPbiosyntheticprocess//GO:0006531aspartatemetabolicprocess//GO:0006541glutaminemetabolicprocess//GO:0014850responsetomuscleactivity//GO:0042594responsetostarvation//GO:0044208'denovo'AMPbiosyntheticprocess//GO:0046040IMPmetabolicprocess//GO:0071257cellularresponsetoelectricalstimulus//GO:0071466cellularresponsetoxenobioticstimulus	GO:0005737cytoplasm//GO:0005829cytosol	GO:0000287magnesiumionbinding//GO:0003924GTPaseactivity//GO:0004019adenylosuccinatesynthaseactivity//GO:0005525GTPbinding//GO:0042301phosphateionbinding//GO:0042802identicalproteinbinding//GO:0051015actinfilamentbinding	2.18228	1.12584	1.27231e-05	5.17807e-05	2.9499	1.56067	8.34361e-08	4.04237e-07	-1.35175	-0.434829	0.00487974	0.00895092	0.16522	1.27192	1.73181	0.131103	0.199338	1.52612	1.1157	1.17394	1.71388	1.94793	1.53361
2.0541	0.752128	-0.157218	-0.348677	-1.1026	-0.243196	-0.888502	-0.0660396	ADSS2	chr1	244408494	244409638	-	3441	adenylosuccinate synthase 2	GO:0002376immunesystemprocess//GO:0006167AMPbiosyntheticprocess//GO:0006531aspartatemetabolicprocess//GO:0014074responsetopurine-containingcompound//GO:0044208'denovo'AMPbiosyntheticprocess//GO:0046040IMPmetabolicprocess//GO:0060359responsetoammoniumion//GO:0071257cellularresponsetoelectricalstimulus	GO:0005737cytoplasm//GO:0005739mitochondrion//GO:0005829cytosol//GO:0070062extracellularexosome	GO:0000287magnesiumionbinding//GO:0004019adenylosuccinatesynthaseactivity//GO:0005515proteinbinding//GO:0005525GTPbinding//GO:0042301phosphateionbinding	-1.14284	-0.192628	0.000314869	0.000937752	-1.13316	-0.180347	0.000710821	0.00180155	-1.00855	-0.0122814	0.770637	0.813545	6.84537	6.65112	6.66484	6.91057	6.78016	6.68908	6.6699	6.59439	6.68047	6.61583	6.69821
0.677681	1.21127	1.03958	-0.494943	-0.120973	-1.60789	0.318312	-1.02304	ADTRP	chr6	11712054	11712234	-	3947	androgen dependent TFPI regulating protein	GO:0001934positiveregulationofproteinphosphorylation//GO:0002042cellmigrationinvolvedinsproutingangiogenesis//GO:0002686negativeregulationofleukocytemigration//GO:0003332negativeregulationofextracellularmatrixconstituentsecretion//GO:0010628positiveregulationofgeneexpression//GO:0030195negativeregulationofbloodcoagulation//GO:0042758long-chainfattyacidcatabolicprocess//GO:0043491proteinkinaseBsig…	GO:0005901caveola//GO:0009986cellsurface//GO:0012505endomembranesystem//GO:0016020membrane//GO:0016021integralcomponentofmembrane	GO:0005515proteinbinding//GO:0016787hydrolaseactivity	-1.20731	-0.271794	0.431147	0.526983	-1.55111	-0.633302	0.105169	0.159956	1.28477	0.361508	0.319731	0.390426	-1.42809	-1.72565	-2.06352	-1.52692	-1.32926	-1.39286	-1.96131	-1.82277	-2.37358	-1.66005	-2.15693
1.15147	0.0181707	-0.490571	-0.576387	-1.86328	0.0482499	0.5727	1.13964	AEBP2	chr12	19404045	19404216	+	6768	AE binding protein 2	GO:0000122negativeregulationoftranscriptionbyRNApolymeraseII//GO:0006325chromatinorganization//GO:0006357regulationoftranscriptionbyRNApolymeraseII	GO:0000785chromatin//GO:0005654nucleoplasm//GO:0035098ESC/E(Z)complex	GO:0001227DNA-bindingtranscriptionrepressoractivity,RNApolymeraseII-specific//GO:0003677DNAbinding//GO:0046872metalionbinding	-1.07671	-0.106629	0.036799	0.0667594	1.00067	0.000971711	0.984227	0.988788	-1.07743	-0.107601	0.0225523	0.0365635	5.74108	5.63236	5.74122	5.78053	5.70163	5.66621	5.66023	5.57064	5.70372	5.74023	5.77971
-0.456878	-0.471357	-0.881573	-0.770951	-0.977896	1.26645	1.21778	1.07443	AEN	chr15	88621337	88621382	+	5976	apoptosis enhancing nuclease	GO:0010212responsetoionizingradiation//GO:0042771intrinsicapoptoticsignalingpathwayinresponsetoDNAdamagebyp53classmediator//GO:0090305nucleicacidphosphodiesterbondhydrolysis	GO:0005634nucleus//GO:0005654nucleoplasm//GO:0005730nucleolus//GO:0031965nuclearmembrane	GO:0003676nucleicacidbinding//GO:0004527exonucleaseactivity//GO:0005515proteinbinding	-1.143	-0.192825	0.000129953	0.000422454	1.70872	0.772917	3.3962e-15	6.17441e-14	-1.95307	-0.965742	3.15926e-18	9.64141e-17	6.92266	6.72917	7.69642	6.92605	6.91927	6.72694	6.7788	6.68177	7.73403	7.71121	7.644
-0.166497	0.477705	1.12777	0.439133	1.24693	-1.31528	-0.482416	-1.32735	AFAP1	chr4	7758714	7763791	-	10017	actin filament associated protein 1	GO:0009966regulationofsignaltransduction//GO:0051493regulationofcytoskeletonorganization	GO:0005829cytosol//GO:0005925focaladhesion//GO:0015629actincytoskeleton	GO:0003779actinbinding//GO:0017124SH3domainbinding//GO:0042169SH2domainbinding	1.12121	0.16506	0.0352589	0.0643353	-1.19146	-0.252731	0.00446223	0.00962294	1.33588	0.417791	6.1053e-06	1.75858e-05	3.8539	4.01862	3.60181	3.78608	3.92172	4.05859	3.9136	4.08368	3.5442	3.71956	3.54166
0.237393	0.424495	-0.417385	-1.85132	0.0549092	-0.734431	1.19694	1.0894	AFAP1-AS1	chr4	7754077	7754159	+	12180	AFAP1 antisense RNA 1				-1.38444	-0.469299	0.306492	0.399387	1.07011	0.097764	0.824093	0.871129	-1.4815	-0.567063	0.186909	0.24485	-2.19831	-2.66461	-2.11701	-2.23912	-2.1575	-2.52477	-3.15034	-2.31873	-2.66309	-1.82051	-1.86743
-0.751091	-0.172871	-0.18287	-1.66799	1.78761	0.447712	0.42596	0.113536	AFAP1L1	chr5	149271859	149271984	+	6568	actin filament associated protein 1 like 1		GO:0002102podosome//GO:0005829cytosol//GO:0030054celljunction//GO:0042995cellprojection	GO:0005515proteinbinding//GO:0017124SH3domainbinding	1.11578	0.158052	0.62928	0.708623	1.26387	0.337843	0.315761	0.40796	-1.13272	-0.179791	0.531416	0.602197	-0.798759	-0.608763	-0.457874	-0.923345	-0.674174	-0.678483	-1.31846	0.170654	-0.406747	-0.41612	-0.550753
-1.22578	-1.40099	1.16483	1.14413	0.837621	-0.0828466	-0.0383332	-0.398629	AFAP1L2	chr10	114294824	114296068	-	5873	actin filament associated protein 1 like 2	GO:0006954inflammatoryresponse//GO:0007346regulationofmitoticcellcycle//GO:0032675regulationofinterleukin-6production//GO:0032757positiveregulationofinterleukin-8production//GO:0045742positiveregulationofepidermalgrowthfactorreceptorsignalingpathway//GO:0045893positiveregulationoftranscription,DNA-templated//GO:0061098positiveregulationofproteintyrosinekinaseactivity	GO:0005737cytoplasm//GO:0005829cytosol//GO:0005886plasmamembrane	GO:0017124SH3domainbinding//GO:0030296proteintyrosinekinaseactivatoractivity//GO:0035591signalingadaptoractivity//GO:0042169SH2domainbinding	1.96823	0.976898	6.47577e-12	1.34917e-10	1.3813	0.466027	6.44857e-06	2.30535e-05	1.42491	0.510871	4.05992e-08	1.64342e-07	3.37173	4.34431	3.84114	3.4078	3.33567	4.39206	4.38354	4.25734	3.87837	3.8967	3.74835
0.0965136	0.160655	1.23624	0.782036	0.96346	-1.58545	-0.916539	-0.736921	AFDN	chr6	167826893	167827237	+	13749	afadin, adherens junction formation factor	GO:0007155celladhesion//GO:0007165signaltransduction//GO:0007267cell-cellsignaling//GO:0010628positiveregulationofgeneexpression//GO:0022409positiveregulationofcell-celladhesion//GO:0030336negativeregulationofcellmigration//GO:0032880regulationofproteinlocalization//GO:0043547positiveregulationofGTPaseactivity//GO:0044331cell-celladhesionmediatedbycadherin//GO:0046931porecomplexassembly//GO:00619…	GO:0005654nucleoplasm//GO:0005829cytosol//GO:0005886plasmamembrane//GO:0005911cell-celljunction//GO:0005912adherensjunction//GO:0016607nuclearspeck//GO:0030054celljunction//GO:0044291cell-cellcontactzone//GO:0046930porecomplex//GO:0070160tightjunction	GO:0005515proteinbinding//GO:0008022proteinC-terminusbinding//GO:0031267smallGTPasebinding//GO:0045296cadherinbinding//GO:0050839celladhesionmoleculebinding//GO:0051015actinfilamentbinding	1.15895	0.212825	0.000132406	0.000429698	-1.2256	-0.293489	3.52853e-06	1.31122e-05	1.42042	0.506313	4.50624e-11	2.99634e-10	7.76785	7.97929	7.47262	7.76001	7.77568	8.0385	7.92752	7.97185	7.34902	7.51247	7.55636
-1.15119	-0.375668	0.352536	0.708655	1.59965	-0.79289	0.740891	-1.08198	AFDN-DT	chr6	167822103	167824806	-	4731	AFDN divergent transcript	GO:0008150biological_process	GO:0005575cellular_component	GO:0003674molecular_function	1.31855	0.398956	0.0724845	0.119998	1.0664	0.0927455	0.687367	0.757696	1.23646	0.30621	0.125159	0.171762	-0.134482	0.278304	-0.0380778	-0.231467	-0.0374961	0.14464	0.233711	0.456563	-0.14185	0.241774	-0.214157
-0.472354	-0.327894	1.27792	1.04059	1.07478	-1.47266	-0.528988	-0.591389	AFF1	chr4	86935002	86935240	+	10953	AF4/FMR2 family member 1	GO:0010468regulationofgeneexpression	GO:0008023transcriptionelongationfactorcomplex//GO:0032783superelongationcomplex	GO:0005515proteinbinding	1.31879	0.399218	1.00864e-07	6.72621e-07	-1.08575	-0.118698	0.0375827	0.0651123	1.43189	0.517916	2.05314e-10	1.20885e-09	6.88646	7.28458	6.76576	6.86768	6.90524	7.32275	7.26104	7.26994	6.6076	6.85295	6.83673
-1.44133	-1.413	1.28911	0.769947	0.783465	-0.15421	0.182994	-0.016979	AFF2	chrX	148500617	148501144	+	14241	AF4/FMR2 family member 2	GO:0006397mRNAprocessing//GO:0007420braindevelopment//GO:0007611learningormemory//GO:0008380RNAsplicing//GO:0010468regulationofgeneexpression//GO:0010629negativeregulationofgeneexpression//GO:0035063nuclearspeckorganization//GO:0043484regulationofRNAsplicing	GO:0016607nuclearspeck	GO:0002151G-quadruplexRNAbinding	2.27496	1.18584	6.84389e-08	4.75431e-07	1.63308	0.707598	0.000215259	0.000596196	1.39305	0.478246	0.000552396	0.00118382	0.802	1.97473	1.50875	0.795005	0.808995	2.14343	1.88704	1.89372	1.43065	1.59718	1.49842
-1.59376	-1.58406	0.662995	0.75743	0.16209	0.339304	0.688232	0.567769	AFF3	chr2	99545419	99551595	-	15701	AF4/FMR2 family member 3	GO:0006355regulationoftranscription,DNA-templated//GO:0010468regulationofgeneexpression//GO:0034612responsetotumornecrosisfactor//GO:0035116embryonichindlimbmorphogenesis	GO:0005634nucleus//GO:0005654nucleoplasm//GO:0005829cytosol//GO:0016604nuclearbody//GO:0032783superelongationcomplex	GO:0003690double-strandedDNAbinding//GO:0003700DNA-bindingtranscriptionfactoractivity	26.5777	4.73215	0.000153263	0.00048998	26.1019	4.70608	0.000182216	0.000511648	1.01823	0.0260639	0.959847	0.968062	-7.78296	-3.09413	-3.08469	-7.79371	-7.77221	-2.79396	-2.58474	-3.90369	-3.51108	-2.73805	-3.00493
-1.39809	-1.44504	0.301755	-0.0793019	-0.0667926	0.388198	0.974395	1.32487	AFF4	chr5	132875395	132881186	-	11281	AF4/FMR2 family member 4	GO:0007286spermatiddevelopment//GO:0010468regulationofgeneexpression	GO:0001650fibrillarcenter//GO:0005654nucleoplasm//GO:0008023transcriptionelongationfactorcomplex//GO:0032783superelongationcomplex//GO:0035327transcriptionallyactivechromatin	GO:0005515proteinbinding	1.31056	0.390182	2.07528e-07	1.27411e-06	1.52925	0.612821	7.74445e-11	6.22047e-10	-1.16687	-0.222638	7.6223e-05	0.00018642	7.00439	7.3927	7.61512	7.01057	6.9982	7.45855	7.35813	7.36143	7.48134	7.63582	7.72819
1.05794	0.361421	-0.278117	0.243846	-2.24875	-0.154673	0.592987	0.425345	AFG1L	chr6	108294991	108295218	+	8353	AFG1 like ATPase	GO:0006123mitochondrialelectrontransport,cytochromectooxygen//GO:0007005mitochondrionorganization//GO:0035694mitochondrialproteincatabolicprocess	GO:0005737cytoplasm//GO:0005739mitochondrion//GO:0031966mitochondrialmembrane	GO:0005515proteinbinding//GO:0005524ATPbinding//GO:0016787hydrolaseactivity//GO:0016887ATPhydrolysisactivity	-1.11211	-0.1533	0.0791899	0.12932	-1.03199	-0.0454331	0.599712	0.683168	-1.07763	-0.107866	0.181138	0.238378	3.38175	3.22019	3.33541	3.42	3.34349	3.27323	3.33057	3.05675	3.28679	3.36893	3.35051
1.14331	0.97154	0.396757	0.331602	0.633828	-1.30596	-1.1791	-0.991976	AFG3L1P	chr16	89972581	89972765	+	9537	AFG3 like matrix AAA peptidase subunit 1, pseudogene				-1.18377	-0.243393	0.000386184	0.00113037	-1.84043	-0.880044	4.05673e-12	4.13776e-11	1.55472	0.636651	5.44613e-10	2.9855e-09	4.65565	4.41539	3.77304	4.68985	4.62145	4.39257	4.36662	4.48697	3.71453	3.76504	3.83956
0.509671	0.0518458	1.16904	0.856671	0.811617	-0.841471	-1.27047	-1.28691	AFG3L2	chr18	12328944	12329783	-	7133	AFG3 like matrix AAA peptidase subunit 2	GO:0006508proteolysis//GO:0007409axonogenesis//GO:0007528neuromuscularjunctiondevelopment//GO:0008053mitochondrialfusion//GO:0016485proteinprocessing//GO:0016540proteinautoprocessing//GO:0021675nervedevelopment//GO:0033619membraneproteinproteolysis//GO:0034982mitochondrialproteinprocessing//GO:0036444calciumimportintothemitochondrion//GO:0040014regulationofmulticellularorganismgrowth//GO:0042407c…	GO:0005739mitochondrion//GO:0005743mitochondrialinnermembrane//GO:0005745m-AAAcomplex	GO:0004176ATP-dependentpeptidaseactivity//GO:0004222metalloendopeptidaseactivity//GO:0005515proteinbinding//GO:0005524ATPbinding//GO:0008237metallopeptidaseactivity//GO:0008270zincionbinding//GO:0051082unfoldedproteinbinding	1.06828	0.0952868	0.0266949	0.0503777	-1.14969	-0.201243	7.3615e-05	0.000220155	1.22819	0.29653	5.60438e-08	2.2182e-07	6.76924	6.8636	6.56866	6.80172	6.73677	6.89528	6.85096	6.84456	6.61002	6.54915	6.54682
0.681642	0.951438	0.398531	0.738891	0.787423	-1.33091	-1.27811	-0.948905	AFMID	chr17	78187358	78187433	+	4008	arylformamidase	GO:0019441tryptophancatabolicprocesstokynurenine//GO:0034354'denovo'NADbiosyntheticprocessfromtryptophan	GO:0005634nucleus//GO:0005737cytoplasm//GO:0005829cytosol	GO:0004061arylformamidaseactivity//GO:0005515proteinbinding//GO:0016787hydrolaseactivity	-1.01112	-0.015961	0.737542	0.800072	-1.12628	-0.171571	0.00193419	0.00449466	1.11389	0.15561	0.00180576	0.00355034	5.2747	5.25966	5.10253	5.2631	5.28629	5.23876	5.26802	5.27219	5.09007	5.09461	5.12291
-1.50959	-1.56138	0.906773	0.28936	0.110313	0.246435	0.483289	1.0348	AFTPH	chr2	64524299	64524612	+	6514	aftiphilin	GO:0015031proteintransport//GO:0046907intracellulartransport	GO:0005654nucleoplasm//GO:0005794Golgiapparatus//GO:0005829cytosol//GO:0030121AP-1adaptorcomplex//GO:0032588trans-Golginetworkmembrane//GO:0043231intracellularmembrane-boundedorganelle//GO:0048471perinuclearregionofcytoplasm	GO:0030276clathrinbinding	1.1203	0.163891	0.000612758	0.00171952	1.12961	0.175823	0.000352424	0.000938979	-1.00831	-0.0119322	0.74901	0.794154	6.40743	6.56997	6.58256	6.40956	6.40529	6.60883	6.55792	6.54315	6.55438	6.57391	6.61939
-0.880528	-0.438363	-1.00858	-0.952154	-0.190108	0.966259	1.30278	1.20069	AFTPH-DT	chr2	64522187	64524110	-	1924	AFTPH divergent transcript				-1.06592	-0.0921003	0.777396	0.832614	3.43667	1.78101	2.09744e-06	8.06951e-06	-3.66321	-1.87311	8.93299e-08	3.42077e-07	-1.16817	-1.22439	0.607297	-1.38432	-0.952027	-1.50951	-1.45435	-0.709315	0.421229	0.750238	0.650423
-0.377141	0.477537	0.975391	1.0859	1.04004	-1.08494	-1.05637	-1.06042	AGA	chr4	177430774	177431808	-	2605	aspartylglucosaminidase	GO:0006508proteolysis//GO:0006517proteindeglycosylation	GO:0005576extracellularregion//GO:0005615extracellularspace//GO:0005737cytoplasm//GO:0005764lysosome//GO:0005783endoplasmicreticulum//GO:0035578azurophilgranulelumen	GO:0003948N4-(beta-N-acetylglucosaminyl)-L-asparaginaseactivity//GO:0005515proteinbinding//GO:0008233peptidaseactivity//GO:0043621proteinself-association	1.16089	0.215227	0.0222666	0.0430325	-1.18428	-0.244016	0.018915	0.0353934	1.37482	0.459242	1.91374e-05	5.12261e-05	2.748	2.9634	2.50327	2.65441	2.84158	2.95062	2.97482	2.96477	2.4994	2.50565	2.50477
-2.15163	0.790074	0.0243043	1.11478	0.169516	0.216566	0.373136	-0.536744	AGA-DT	chr4	177442519	177442581	+	6016	AGA divergent transcript				1.52244	0.606382	0.348096	0.444205	1.29781	0.376082	0.577811	0.663341	1.17308	0.2303	0.677315	0.733043	-3.82055	-3.21057	-3.43914	-4.62378	-3.01732	-3.43551	-2.84	-3.35621	-3.33051	-3.24501	-3.74189
0.174542	0.626781	1.0201	1.03733	0.588994	-1.40455	-0.858762	-1.18443	AGAP1	chr2	235494043	235494849	+	13947	ArfGAP with GTPase domain, ankyrin repeat and PH domain 1	GO:0015031proteintransport//GO:0050790regulationofcatalyticactivity	GO:0005634nucleus//GO:0005737cytoplasm	GO:0003924GTPaseactivity//GO:0005096GTPaseactivatoractivity//GO:0005515proteinbinding//GO:0005525GTPbinding//GO:0005543phospholipidbinding//GO:0046872metalionbinding	1.0428	0.0604633	0.128717	0.195203	-1.14181	-0.191325	7.37373e-05	0.000220492	1.19068	0.251788	3.57705e-07	1.24264e-06	7.19292	7.25242	7.00139	7.16498	7.22087	7.26947	7.2716	7.2162	6.96984	7.03729	6.99704
1.31432	0.147506	0.667084	-0.636537	-1.8846	0.812405	0.0142034	-0.434386	AGAP1-IT1	chr2	235505553	235505634	+	746	AGAP1 intronic transcript 1				-1.17773	-0.236011	0.178435	0.256791	-1.08773	-0.121314	0.492289	0.583404	-1.08275	-0.114696	0.485535	0.558438	0.980013	0.721112	0.864821	1.09199	0.868039	0.967762	0.717557	0.478016	0.995654	0.842454	0.756356
-0.237183	0.962582	-0.566553	1.24889	0.13217	0.53442	-0.1201	-1.95422	AGAP13P	chr10	46816516	46816738	+	2061	ArfGAP with GTPase domain, ankyrin repeat and PH domain 13, pseudogene				-1.01391	-0.0199306	0.932364	0.950733	-1.10114	-0.138994	0.577564	0.663091	1.08603	0.119063	0.596142	0.662345	-0.410042	-0.423579	-0.540076	-0.499089	-0.320995	-0.547981	-0.278495	-0.444262	-0.384551	-0.481709	-0.753967
-1.9125	-0.989704	-0.0255731	0.147982	0.165781	0.910322	0.979934	0.723761	AGAP2	chr12	57723761	57726794	-	7224	ArfGAP with GTPase domain, ankyrin repeat and PH domain 2	GO:0015031proteintransport//GO:0016197endosomaltransport//GO:0030036actincytoskeletonorganization//GO:0032147activationofproteinkinaseactivity//GO:0042177negativeregulationofproteincatabolicprocess//GO:0043524negativeregulationofneuronapoptoticprocess//GO:0045860positiveregulationofproteinkinaseactivity//GO:0061903positiveregulationof1-phosphatidylinositol-3-kinaseactivity	GO:0005634nucleus//GO:0005654nucleoplasm//GO:0005737cytoplasm//GO:0005768endosome//GO:0005829cytosol//GO:0016020membrane//GO:0070062extracellularexosome//GO:0090543Flemmingbody	GO:0003924GTPaseactivity//GO:0005096GTPaseactivatoractivity//GO:0005515proteinbinding//GO:0005524ATPbinding//GO:0005525GTPbinding//GO:0019901proteinkinasebinding//GO:0030295proteinkinaseactivatoractivity//GO:0035014phosphatidylinositol3-kinaseregulatoractivity//GO:0046872metalionbinding	5.04831	2.3358	9.26119e-05	0.000311189	11.4672	3.51945	2.15578e-07	9.75194e-07	-2.2715	-1.18365	2.70528e-05	7.08133e-05	-3.18681	-0.83954	0.336663	-3.88682	-2.4868	-1.02408	-0.760772	-0.733768	0.395807	0.501417	0.112766
-0.238462	-0.276033	-0.82897	-1.07559	-1.00463	1.15542	1.36445	0.903799	AGAP3	chr7	151085831	151086060	+	11299	ArfGAP with GTPase domain, ankyrin repeat and PH domain 3	GO:0034614cellularresponsetoreactiveoxygenspecies//GO:0043161proteasome-mediatedubiquitin-dependentproteincatabolicprocess//GO:0050790regulationofcatalyticactivity	GO:0005634nucleus//GO:0005737cytoplasm//GO:0071944cellperiphery	GO:0003924GTPaseactivity//GO:0005096GTPaseactivatoractivity//GO:0005525GTPbinding//GO:0031593polyubiquitinmodification-dependentproteinbinding//GO:0046872metalionbinding	-1.15152	-0.203537	0.000120189	0.00039327	1.32026	0.400822	4.3145e-09	2.56858e-08	-1.5203	-0.604359	2.31424e-13	2.39771e-12	6.70949	6.50483	7.11122	6.71489	6.7041	6.54526	6.47442	6.4948	7.11529	7.17534	7.04301
0.641754	-0.32915	-0.271901	-0.933532	-1.65925	0.641219	0.433696	1.47717	AGAP4	chr10	45825594	45827390	-	3217	ArfGAP with GTPase domain, ankyrin repeat and PH domain 4	GO:0050790regulationofcatalyticactivity	GO:0005634nucleus	GO:0005096GTPaseactivatoractivity//GO:0046872metalionbinding	-1.16247	-0.217191	0.112505	0.174545	1.10806	0.148033	0.268476	0.356582	-1.28808	-0.365224	0.00601215	0.0108676	1.76926	1.539	1.91314	1.86985	1.66866	1.68053	1.54343	1.39305	1.86974	1.82674	2.04296
-0.261096	0.443764	1.11051	-0.688473	-0.239842	-0.184539	1.47825	-1.65858	AGAP5	chr10	73674287	73676074	-	3061	ArfGAP with GTPase domain, ankyrin repeat and PH domain 5	GO:0050790regulationofcatalyticactivity	GO:0005634nucleus	GO:0005096GTPaseactivatoractivity//GO:0046872metalionbinding	1.01496	0.0214163	0.952303	0.965197	-1.07994	-0.110958	0.76903	0.82751	1.0961	0.132374	0.697058	0.74976	-1.23501	-1.24798	-1.32523	-1.38432	-1.08571	-0.803238	-1.56538	-1.37531	-1.35189	-0.647446	-1.97636
-0.504728	0.872046	-1.08618	-1.03529	-0.542613	-0.268133	1.47932	1.08557	AGAP6	chr10	49982190	49982412	+	5616	ArfGAP with GTPase domain, ankyrin repeat and PH domain 6	GO:0050790regulationofcatalyticactivity	GO:0005634nucleus	GO:0005096GTPaseactivatoractivity//GO:0046872metalionbinding	-1.11574	-0.158002	0.312101	0.405408	1.0633	0.0885487	0.571592	0.657647	-1.18637	-0.246551	0.0936373	0.132442	1.04403	0.8889	1.12826	0.944383	1.14367	0.860217	0.867583	0.938899	0.97863	1.23158	1.17458
-0.786822	0.273231	0.185621	1.54389	-1.69018	-0.630024	0.66359	0.440696	AGAP9	chr10	47501854	47503543	-	2387	ArfGAP with GTPase domain, ankyrin repeat and PH domain 9	GO:0050790regulationofcatalyticactivity	GO:0005634nucleus	GO:0005096GTPaseactivatoractivity//GO:0046872metalionbinding	1.03799	0.0537936	0.757361	0.81633	1.04876	0.0686785	0.703713	0.772354	-1.01037	-0.0148849	0.925898	0.940966	0.785092	0.827331	0.85002	0.702146	0.868039	0.854329	1.06689	0.560774	0.726684	0.929129	0.894247
-0.18807	-0.532225	1.00411	1.48222	0.153819	-0.43475	0.296863	-1.78196	AGBL2	chr11	47659591	47660346	-	5477	AGBL carboxypeptidase 2	GO:0006508proteolysis//GO:0035610proteinsidechaindeglutamylation	GO:0005814centriole//GO:0005829cytosol//GO:0036064ciliarybasalbody	GO:0004181metallocarboxypeptidaseactivity//GO:0008270zincionbinding	1.42838	0.514377	0.182485	0.261637	-1.09415	-0.129811	0.759279	0.819938	1.56286	0.644188	0.0814731	0.117089	-2.0303	-1.52954	-2.14328	-1.96082	-2.09978	-1.47945	-1.2864	-1.82277	-2.06042	-1.76502	-2.60439
0.542873	1.61461	-0.604199	0.541719	0.415037	-1.49923	-1.00988	-0.000925167	AGBL3	chr7	134986508	134986701	+	7307	AGBL carboxypeptidase 3	GO:0006508proteolysis//GO:0035610proteinsidechaindeglutamylation	GO:0005829cytosol	GO:0004181metallocarboxypeptidaseactivity//GO:0008270zincionbinding	-1.34394	-0.426468	0.0732905	0.121149	-1.72782	-0.788957	0.00512912	0.0109369	1.28564	0.362488	0.151564	0.203705	0.206721	-0.198031	-0.599826	-0.0189224	0.432365	-0.501933	-0.0194082	-0.0727515	-0.878816	-0.672757	-0.247906
1.33887	1.3245	0.0591254	0.287983	0.146835	-0.930743	-1.10778	-1.11879	AGBL5	chr2	27042364	27042548	+	5283	AGBL carboxypeptidase 5	GO:0006508proteolysis//GO:0035608proteindeglutamylation//GO:0035611proteinbranchingpointdeglutamylation//GO:0051607defenseresponsetovirus	GO:0005634nucleus//GO:0005737cytoplasm//GO:0005829cytosol//GO:0015630microtubulecytoskeleton//GO:0030496midbody//GO:0045171intercellularbridge//GO:0072686mitoticspindle	GO:0004181metallocarboxypeptidaseactivity//GO:0008270zincionbinding//GO:0015631tubulinbinding	-1.33793	-0.420004	1.91345e-08	1.52836e-07	-1.81078	-0.856611	1.05986e-13	1.45754e-12	1.35342	0.436607	1.24153e-08	5.43331e-08	5.3672	4.94843	4.5117	5.36978	5.36463	4.91056	4.99269	4.94204	4.55536	4.49184	4.48789
0.0328851	-1.47047	-0.714841	-0.0580451	-0.944897	1.31417	0.981353	0.859846	AGBL5-IT1	chr2	27061038	27061206	+	339	AGBL5 intronic transcript 1				1.04478	0.0632042	0.86549	0.901299	1.69579	0.761955	0.0420521	0.0719015	-1.6231	-0.698751	0.0314602	0.0496194	-1.89125	-1.82778	-1.1225	-1.56489	-2.21762	-1.88954	-1.60437	-1.98942	-1.00858	-1.15309	-1.20584
0.788	0.579855	0.812549	0.421762	0.96199	-1.27473	-1.27434	-1.01508	AGER	chr6	32180968	32181239	-	2075	advanced glycosylation end-product specific receptor	GO:0001666responsetohypoxia//GO:0001774microglialcellactivation//GO:0001914regulationofTcellmediatedcytotoxicity//GO:0001934positiveregulationofproteinphosphorylation//GO:0006897endocytosis//GO:0006954inflammatoryresponse//GO:0007166cellsurfacereceptorsignalingpathway//GO:0007611learningormemory//GO:0009611responsetowounding//GO:0010255glucosemediatedsignalingpathway//GO:0031175neuronprojectionde…	GO:0001650fibrillarcenter//GO:0005576extracellularregion//GO:0005886plasmamembrane//GO:0005887integralcomponentofplasmamembrane//GO:0009986cellsurface//GO:0016324apicalplasmamembrane//GO:0030054celljunction//GO:0098794postsynapse	GO:0001540amyloid-betabinding//GO:0004888transmembranesignalingreceptoractivity//GO:0005044scavengerreceptoractivity//GO:0005515proteinbinding//GO:0038023signalingreceptoractivity//GO:0042802identicalproteinbinding//GO:0044548S100proteinbinding//GO:0044877protein-containingcomplexbinding//GO:0050785advancedglycationend-productreceptoractivity	1.01562	0.0223641	0.819737	0.866094	-1.92213	-0.942703	5.07578e-08	2.53678e-07	1.95215	0.965067	8.23631e-09	3.7214e-08	2.70349	2.72783	1.75768	2.75608	2.65091	2.76848	2.57103	2.84398	1.71388	1.71408	1.84507
-0.517302	-0.619719	-0.844094	-0.94103	-0.666715	1.18856	1.12139	1.27891	AGFG1	chr2	227472152	227472588	+	9324	ArfGAP with FG repeats 1	GO:0006406mRNAexportfromnucleus//GO:0007283spermatogenesis//GO:0030154celldifferentiation//GO:0050790regulationofcatalyticactivity	GO:0005643nuclearpore//GO:0005829cytosol//GO:0031410cytoplasmicvesicle//GO:0043231intracellularmembrane-boundedorganelle	GO:0003677DNAbinding//GO:0003723RNAbinding//GO:0005096GTPaseactivatoractivity//GO:0005515proteinbinding//GO:0046872metalionbinding	-1.03363	-0.0477219	0.248307	0.335851	1.26078	0.334315	2.93746e-08	1.52583e-07	-1.30318	-0.382036	3.70399e-10	2.08366e-09	6.39665	6.34955	6.73077	6.40635	6.38696	6.34448	6.32612	6.37806	6.72931	6.71659	6.74641
-1.27815	-0.978128	-0.269764	-0.619677	-0.225746	1.08613	1.37805	0.907285	AGFG2	chr7	100539203	100539567	+	5487	ArfGAP with FG repeats 2	GO:0008150biological_process//GO:0050790regulationofcatalyticactivity	GO:0016020membrane	GO:0003674molecular_function//GO:0005096GTPaseactivatoractivity//GO:0046872metalionbinding	1.09009	0.124454	0.0408361	0.073182	1.29175	0.369328	1.87483e-06	7.26046e-06	-1.18499	-0.244874	7.42879e-05	0.000181959	4.37464	4.49891	4.74462	4.34999	4.39928	4.51566	4.45817	4.52289	4.73842	4.78638	4.70904
0.561482	-0.0330422	1.10513	0.592559	1.12462	-0.925303	-1.36907	-1.05637	AGGF1	chr5	77029251	77029477	+	5032	angiogenic factor with G-patch and FHA domains 1	GO:0001525angiogenesis//GO:0001570vasculogenesis//GO:0001938positiveregulationofendothelialcellproliferation//GO:0007155celladhesion//GO:0045766positiveregulationofangiogenesis	GO:0005576extracellularregion//GO:0005737cytoplasm//GO:0048471perinuclearregionofcytoplasm	GO:0003676nucleicacidbinding//GO:0005515proteinbinding	1.10975	0.150228	0.018366	0.0362119	-1.23713	-0.306997	7.69389e-05	0.000229249	1.3729	0.457226	4.81664e-08	1.92699e-07	4.65379	4.80395	4.34726	4.71977	4.58782	4.84043	4.72667	4.84476	4.38978	4.29129	4.36069
-1.2485	-0.78576	0.594779	-0.169801	0.43131	-1.19724	1.21043	1.16478	AGGF1P2	chr10	133640789	133642894	+	2106	angiogenic factor with G-patch and FHA domains 1 pseudogene 2				2.08903	1.06283	0.0703806	0.117032	2.26268	1.17803	0.0506489	0.0847406	-1.08313	-0.115201	0.782284	0.823192	-2.74924	-1.69935	-1.61292	-2.93573	-2.56275	-1.45001	-2.06627	-1.58177	-2.89441	-0.953777	-0.990574
1.29098	0.876105	0.303291	0.222268	0.632359	-1.51297	-1.12249	-0.689539	AGK	chr7	141551278	141551434	+	10697	acylglycerol kinase	GO:0006665sphingolipidmetabolicprocess//GO:0016310phosphorylation//GO:0045039proteininsertionintomitochondrialinnermembrane//GO:0046486glycerolipidmetabolicprocess//GO:0046513ceramidebiosyntheticprocess//GO:0046834lipidphosphorylation	GO:0005737cytoplasm//GO:0005739mitochondrion//GO:0005741mitochondrialoutermembrane//GO:0005743mitochondrialinnermembrane//GO:0005758mitochondrialintermembranespace//GO:0005829cytosol//GO:0016020membrane//GO:0031305integralcomponentofmitochondrialinnermembrane//GO:0031966mitochondrialmembrane//GO:0042721TIM22mitochondrialimportinnermembraneinsertioncomplex//GO:0043231intracellularmembrane-boundedo…	GO:0001727lipidkinaseactivity//GO:0001729ceramidekinaseactivity//GO:0003951NAD+kinaseactivity//GO:0004143diacylglycerolkinaseactivity//GO:0005515proteinbinding//GO:0005524ATPbinding//GO:0047620acylglycerolkinaseactivity//GO:0102773dihydroceramidekinaseactivity	-1.09193	-0.126876	0.0300861	0.0559865	-1.31078	-0.39043	8.62928e-07	3.53037e-06	1.20043	0.263554	5.35646e-05	0.000133955	4.95476	4.82971	4.56183	4.99195	4.91757	4.81489	4.80036	4.87388	4.48929	4.55929	4.63691
1.23156	1.28787	-1.25651	-0.658018	-1.28685	0.202322	0.261139	0.218487	AGK-DT	chr7	141500079	141501300	-	2298	AGK divergent transcript				-1.85295	-0.889827	3.04191e-08	2.30856e-07	-1.31411	-0.394091	0.00100793	0.00247588	-1.41004	-0.495736	0.000123106	0.000291737	2.58008	1.69165	2.18589	2.56933	2.59083	1.61934	1.84786	1.60776	2.17635	2.19881	2.18252
1.18515	0.795715	-0.43508	-0.723125	-0.785078	-1.28918	-0.145071	1.39667	AGL	chr1	99850361	99850415	+	8157	amylo-alpha-1, 6-glucosidase, 4-alpha-glucanotransferase	GO:0005978glycogenbiosyntheticprocess//GO:0005980glycogencatabolicprocess//GO:0007584responsetonutrient//GO:0051384responsetoglucocorticoid	GO:0005576extracellularregion//GO:0005634nucleus//GO:0005737cytoplasm//GO:0005829cytosol//GO:0016234inclusionbody//GO:0016529sarcoplasmicreticulum//GO:0034774secretorygranulelumen//GO:0043033isoamylasecomplex//GO:1904813ficolin-1-richgranulelumen	GO:0004133glycogendebranchingenzymeactivity//GO:00041344-alpha-glucanotransferaseactivity//GO:0004135amylo-alpha-1,6-glucosidaseactivity//GO:0005515proteinbinding//GO:0030247polysaccharidebinding//GO:0031593polyubiquitinmodification-dependentproteinbinding//GO:0102500beta-maltose4-alpha-glucanotransferaseactivity	-1.09067	-0.12521	0.0164542	0.0328627	-1.0532	-0.0747774	0.140609	0.205704	-1.03558	-0.0504322	0.265925	0.333113	6.43727	6.31151	6.36028	6.45221	6.42232	6.32784	6.30573	6.30097	6.26228	6.3501	6.46845
1.3817	1.34043	-0.99	-1.13683	-0.957915	0.297948	-0.0489314	0.113599	AGMAT	chr1	15571699	15573724	-	3095	agmatinase	GO:0008295spermidinebiosyntheticprocess//GO:0033389putrescinebiosyntheticprocessfromarginine,usingagmatinase//GO:0097055agmatinebiosyntheticprocess	GO:0005739mitochondrion	GO:0008783agmatinaseactivity//GO:0046872metalionbinding	-2.9668	-1.56891	1.96832e-17	3.16308e-15	-1.76028	-0.815802	4.0232e-12	4.11079e-11	-1.68542	-0.753105	7.58076e-11	4.83771e-10	5.21701	3.64833	4.40277	5.23056	5.20346	3.67344	3.57704	3.6945	4.51903	4.29129	4.398
-0.12022	-2.26913	0.392912	0.385059	0.0728959	1.00514	0.700321	-0.166978	AGMO	chr7	15200317	15201359	-	3588	alkylglycerol monooxygenase	GO:0006643membranelipidmetabolicprocess//GO:0019432triglyceridebiosyntheticprocess//GO:0046485etherlipidmetabolicprocess	GO:0005783endoplasmicreticulum//GO:0005789endoplasmicreticulummembrane//GO:0016021integralcomponentofmembrane	GO:0005506ironionbinding//GO:0005515proteinbinding//GO:0050479glyceryl-ethermonooxygenaseactivity	1.76629	0.820723	0.00920738	0.0196641	1.89651	0.923344	0.00455255	0.00980208	-1.07372	-0.102621	0.648223	0.707942	-0.639282	0.177655	0.304318	-0.0455166	-1.23305	0.238051	0.233711	0.061203	0.576379	0.407931	-0.0713562
0.163617	0.455366	1.03389	0.840727	0.952139	-1.38594	-1.17365	-0.886145	AGO1	chr1	35869808	35869903	+	14043	argonaute RISC component 1	GO:0000956nuclear-transcribedmRNAcatabolicprocess//GO:0010501RNAsecondarystructureunwinding//GO:0016525negativeregulationofangiogenesis//GO:0031054pre-miRNAprocessing//GO:0035196productionofmiRNAsinvolvedingenesilencingbymiRNA//GO:0035278miRNAmediatedinhibitionoftranslation//GO:0035280miRNAloadingontoRISCinvolvedingenesilencingbymiRNA//GO:0045944positiveregulationoftranscriptionbyRNApolymeraseII	GO:0000932P-body//GO:0005634nucleus//GO:0005654nucleoplasm//GO:0005737cytoplasm//GO:0005829cytosol//GO:0005844polysome//GO:0016442RISCcomplex//GO:0036464cytoplasmicribonucleoproteingranule//GO:0070578RISC-loadingcomplex//GO:1990904ribonucleoproteincomplex	GO:0000993RNApolymeraseIIcomplexbinding//GO:0001046corepromotersequence-specificDNAbinding//GO:0003723RNAbinding//GO:0003725double-strandedRNAbinding//GO:0003727single-strandedRNAbinding//GO:0005515proteinbinding//GO:0035198miRNAbinding	1.16101	0.215383	0.000173749	0.000549361	-1.40637	-0.491976	2.17548e-09	1.36748e-08	1.63281	0.70736	2.18511e-13	2.28661e-12	6.19523	6.40976	5.7009	6.14578	6.24469	6.44083	6.37534	6.41311	5.62043	5.6924	5.78988
1.10743	1.40387	0.315527	0.0497175	0.300987	-1.39783	-1.08027	-0.699436	AGO2	chr8	140520156	140532152	-	15847	argonaute RISC catalytic component 2	GO:0006412translation//GO:0006413translationalinitiation//GO:0009791post-embryonicdevelopment//GO:0010501RNAsecondarystructureunwinding//GO:0010586miRNAmetabolicprocess//GO:0031047genesilencingbyRNA//GO:0031054pre-miRNAprocessing//GO:0035087siRNAloadingontoRISCinvolvedinRNAinterference//GO:0035194post-transcriptionalgenesilencingbyRNA//GO:0035196productionofmiRNAsinvolvedingenesilencingbymiRNA//G…	GO:0000932P-body//GO:0005634nucleus//GO:0005654nucleoplasm//GO:0005737cytoplasm//GO:0005829cytosol//GO:0005844polysome//GO:0005845mRNAcapbindingcomplex//GO:0016020membrane//GO:0016442RISCcomplex//GO:0030425dendrite//GO:0036464cytoplasmicribonucleoproteingranule//GO:0070062extracellularexosome//GO:0070578RISC-loadingcomplex//GO:1990904ribonucleoproteincomplex	GO:0000340RNA7-methylguanosinecapbinding//GO:0000993RNApolymeraseIIcomplexbinding//GO:0001046corepromotersequence-specificDNAbinding//GO:0003723RNAbinding//GO:0003725double-strandedRNAbinding//GO:0003727single-strandedRNAbinding//GO:0003743translationinitiationfactoractivity//GO:0004521endoribonucleaseactivity//GO:0005515proteinbinding//GO:0008022proteinC-terminusbinding//GO:0035197siRNAbinding//…	-1.30644	-0.385635	2.98004e-07	1.75954e-06	-1.81718	-0.8617	2.78424e-13	3.56842e-12	1.39094	0.476065	5.16902e-09	2.41039e-08	7.0097	6.62355	6.14487	6.95433	7.06508	6.65847	6.55916	6.65303	6.01835	6.13699	6.27927
0.297792	0.710087	0.961546	0.840603	0.511456	-1.6977	-1.20801	-0.41578	AGO3	chr1	35930718	35930798	+	21153	argonaute RISC catalytic component 3	GO:0006402mRNAcatabolicprocess//GO:0010501RNAsecondarystructureunwinding//GO:0010628positiveregulationofgeneexpression//GO:0031054pre-miRNAprocessing//GO:0035196productionofmiRNAsinvolvedingenesilencingbymiRNA//GO:0035278miRNAmediatedinhibitionoftranslation//GO:0035280miRNAloadingontoRISCinvolvedingenesilencingbymiRNA//GO:0072091regulationofstemcellproliferation//GO:0090502RNAphosphodiesterbondhy…	GO:0000794condensednuclearchromosome//GO:0000932P-body//GO:0005654nucleoplasm//GO:0005737cytoplasm//GO:0005829cytosol//GO:0016020membrane//GO:0016442RISCcomplex//GO:0036464cytoplasmicribonucleoproteingranule//GO:0070578RISC-loadingcomplex	GO:0003723RNAbinding//GO:0003725double-strandedRNAbinding//GO:0003727single-strandedRNAbinding//GO:0004521endoribonucleaseactivity//GO:0005515proteinbinding//GO:0035198miRNAbinding//GO:0046872metalionbinding//GO:0090624endoribonucleaseactivity,cleavingmiRNA-pairedmRNA	1.04113	0.0581493	0.354138	0.45024	-1.25546	-0.328218	5.01875e-05	0.00015398	1.3071	0.386368	1.29645e-06	4.14416e-06	4.93565	4.99093	4.6024	4.89301	4.97829	5.03031	5.00529	4.93721	4.48025	4.58154	4.74541
0.244242	0.408434	1.03285	0.853757	0.952019	-1.2131	-1.18799	-1.09022	AGO4	chr1	35808016	35808435	+	7423	argonaute RISC component 4	GO:0006402mRNAcatabolicprocess//GO:0007130synaptonemalcomplexassembly//GO:0007140malemeioticnucleardivision//GO:0008584malegonaddevelopment//GO:0010501RNAsecondarystructureunwinding//GO:0010586miRNAmetabolicprocess//GO:0022604regulationofcellmorphogenesis//GO:0031054pre-miRNAprocessing//GO:0035196productionofmiRNAsinvolvedingenesilencingbymiRNA//GO:0035278miRNAmediatedinhibitionoftranslation//GO:…	GO:0000932P-body//GO:0005634nucleus//GO:0005737cytoplasm//GO:0005829cytosol//GO:0016020membrane//GO:0016442RISCcomplex//GO:0036464cytoplasmicribonucleoproteingranule//GO:0070578RISC-loadingcomplex	GO:0003725double-strandedRNAbinding//GO:0003727single-strandedRNAbinding//GO:0005515proteinbinding//GO:0035198miRNAbinding	1.13418	0.181653	0.000809465	0.00220921	-1.35091	-0.433929	1.68825e-08	9.1306e-08	1.53218	0.615583	3.01234e-12	2.47227e-11	5.31155	5.49237	4.8769	5.28761	5.3355	5.51764	5.4654	5.49406	4.86251	4.86983	4.89835
-1.30584	-1.29125	0.838182	0.965538	1.3394	0.0452137	-0.191175	-0.400062	AGPAT1	chr6	32168212	32169448	-	3593	1-acylglycerol-3-phosphate O-acyltransferase 1	GO:0001819positiveregulationofcytokineproduction//GO:0001961positiveregulationofcytokine-mediatedsignalingpathway//GO:0006644phospholipidmetabolicprocess//GO:0006654phosphatidicacidbiosyntheticprocess//GO:0016024CDP-diacylglycerolbiosyntheticprocess	GO:0005783endoplasmicreticulum//GO:0005789endoplasmicreticulummembrane//GO:0016020membrane//GO:0016021integralcomponentofmembrane	GO:00038411-acylglycerol-3-phosphateO-acyltransferaseactivity//GO:0005515proteinbinding	1.37626	0.460754	8.60317e-10	9.68647e-09	1.16409	0.219201	0.000107876	0.000313597	1.18226	0.241553	4.95401e-06	1.44802e-05	5.86739	6.33013	6.0876	5.86595	5.86883	6.2888	6.31392	6.38765	6.13241	6.08579	6.04459
0.0453558	-0.231963	1.09347	1.06921	1.12385	-0.865166	-0.897578	-1.33718	AGPAT2	chr9	136673143	136673927	-	1832	1-acylglycerol-3-phosphate O-acyltransferase 2	GO:0001819positiveregulationofcytokineproduction//GO:0001961positiveregulationofcytokine-mediatedsignalingpathway//GO:0006644phospholipidmetabolicprocess//GO:0006654phosphatidicacidbiosyntheticprocess//GO:0008544epidermisdevelopment//GO:0009410responsetoxenobioticstimulus//GO:0016024CDP-diacylglycerolbiosyntheticprocess	GO:0005783endoplasmicreticulum//GO:0005789endoplasmicreticulummembrane//GO:0005886plasmamembrane//GO:0016021integralcomponentofmembrane//GO:0035579specificgranulemembrane	GO:00038411-acylglycerol-3-phosphateO-acyltransferaseactivity	1.35402	0.437245	5.14707e-08	3.68014e-07	-1.27425	-0.349651	5.9149e-06	2.12648e-05	1.72536	0.786896	3.64044e-13	3.61839e-12	5.03769	5.47538	4.69161	5.08874	4.98664	5.47463	5.4657	5.48581	4.75352	4.74158	4.57973
-0.417008	-0.530764	1.32606	0.995521	1.20844	-1.01949	-0.588892	-0.973869	AGPAT3	chr21	43865223	43865345	+	12315	1-acylglycerol-3-phosphate O-acyltransferase 3	GO:0006654phosphatidicacidbiosyntheticprocess//GO:0008654phospholipidbiosyntheticprocess//GO:0016024CDP-diacylglycerolbiosyntheticprocess	GO:0000139Golgimembrane//GO:0005635nuclearenvelope//GO:0005783endoplasmicreticulum//GO:0005789endoplasmicreticulummembrane//GO:0005886plasmamembrane//GO:0012505endomembranesystem//GO:0016020membrane//GO:0016021integralcomponentofmembrane	GO:00038411-acylglycerol-3-phosphateO-acyltransferaseactivity//GO:0005515proteinbinding//GO:0016746acyltransferaseactivity	1.14512	0.195496	1.82185e-05	7.16271e-05	-1.03227	-0.04582	0.226794	0.309908	1.18207	0.241316	2.14265e-07	7.7079e-07	7.339	7.53418	7.29325	7.34572	7.33227	7.55184	7.51276	7.53793	7.27448	7.3254	7.27987
-1.32479	-1.57353	0.906977	1.0469	0.906968	0.05082	0.105292	-0.118635	AGPAT4	chr6	161129967	161136634	-	14253	1-acylglycerol-3-phosphate O-acyltransferase 4	GO:0006654phosphatidicacidbiosyntheticprocess//GO:0008654phospholipidbiosyntheticprocess//GO:0016024CDP-diacylglycerolbiosyntheticprocess	GO:0005741mitochondrialoutermembrane//GO:0005783endoplasmicreticulum//GO:0005789endoplasmicreticulummembrane//GO:0012505endomembranesystem//GO:0016021integralcomponentofmembrane	GO:00038411-acylglycerol-3-phosphateO-acyltransferaseactivity//GO:0005515proteinbinding//GO:0016746acyltransferaseactivity	2.37712	1.24921	9.28166e-11	1.37077e-09	1.69071	0.757633	1.50153e-06	5.90842e-06	1.40599	0.491582	8.30201e-06	2.34345e-05	1.68268	2.93288	2.4432	1.74739	1.61796	2.90861	2.98142	2.90861	2.46314	2.49148	2.37497
1.57943	1.30251	0.0852403	0.0504225	-0.175038	-0.782788	-1.1609	-0.898879	AGPAT5	chr8	6708642	6708887	+	6236	1-acylglycerol-3-phosphate O-acyltransferase 5	GO:0002244hematopoieticprogenitorcelldifferentiation//GO:0006639acylglycerolmetabolicprocess//GO:0006654phosphatidicacidbiosyntheticprocess//GO:0008654phospholipidbiosyntheticprocess//GO:0016024CDP-diacylglycerolbiosyntheticprocess	GO:0005635nuclearenvelope//GO:0005739mitochondrion//GO:0005741mitochondrialoutermembrane//GO:0005789endoplasmicreticulummembrane//GO:0012505endomembranesystem//GO:0016021integralcomponentofmembrane	GO:00038411-acylglycerol-3-phosphateO-acyltransferaseactivity//GO:0005515proteinbinding//GO:0016746acyltransferaseactivity	-1.40808	-0.493733	2.72649e-10	3.52984e-09	-1.75811	-0.814023	3.1825e-14	4.78938e-13	1.24858	0.32029	2.90809e-07	1.02591e-06	6.73932	6.24392	5.92558	6.78649	6.69215	6.27743	6.26557	6.18876	5.9817	5.85288	5.94215
-0.555	-0.642131	-0.687904	-0.864189	-0.848321	1.13647	1.13066	1.33042	AGPS	chr2	177392746	177393049	+	15223	alkylglycerone phosphate synthase	GO:0008610lipidbiosyntheticprocess//GO:0008611etherlipidbiosyntheticprocess	GO:0005730nucleolus//GO:0005739mitochondrion//GO:0005777peroxisome//GO:0005778peroxisomalmembrane//GO:0005782peroxisomalmatrix//GO:0005829cytosol//GO:0016020membrane	GO:0005515proteinbinding//GO:0008609alkylglycerone-phosphatesynthaseactivity//GO:0016491oxidoreductaseactivity//GO:0071949FADbinding	-1.04706	-0.0663384	0.0843668	0.136474	1.51689	0.601117	6.00724e-14	8.6279e-13	-1.58827	-0.667455	6.45038e-16	1.14551e-14	7.72437	7.65703	8.3249	7.73892	7.70981	7.69452	7.63564	7.64094	8.30395	8.30201	8.36874
0.00833308	-0.0145511	-1.06546	-1.03582	-1.12431	1.22981	0.926521	1.07548	AGR2	chr7	16791811	16792957	-	2764	anterior gradient 2, protein disulphide isomerase family member	GO:0010628positiveregulationofgeneexpression//GO:0010811positiveregulationofcell-substrateadhesion//GO:0045742positiveregulationofepidermalgrowthfactorreceptorsignalingpathway//GO:0048546digestivetractmorphogenesis//GO:0048639positiveregulationofdevelopmentalgrowth//GO:0060480lunggobletcelldifferentiation//GO:0060548negativeregulationofcelldeath//GO:0070254mucussecretion//GO:1903078positiveregula…	GO:0005615extracellularspace//GO:0005783endoplasmicreticulum	GO:0002162dystroglycanbinding//GO:0005154epidermalgrowthfactorreceptorbinding//GO:0005515proteinbinding//GO:0042802identicalproteinbinding	-1.47692	-0.562591	2.90828e-13	9.53386e-12	1.48138	0.566946	1.23819e-13	1.6838e-12	-2.18789	-1.12954	9.44104e-21	5.75478e-19	9.73068	9.16766	10.2981	9.73669	9.72467	9.17278	9.18834	9.14187	10.3782	10.2189	10.2971
-0.0713695	0.0504614	-1.11662	-1.07763	-1.02325	1.18449	0.915369	1.13855	AGR3	chr7	16859412	16859631	-	1153	anterior gradient 3, protein disulphide isomerase family member	GO:0008150biological_process//GO:0060548negativeregulationofcelldeath	GO:0005783endoplasmicreticulum//GO:0043231intracellularmembrane-boundedorganelle	GO:0002162dystroglycanbinding//GO:0005515proteinbinding	-2.09266	-1.06534	9.81432e-11	1.42923e-09	2.12847	1.08982	1.25529e-12	1.42805e-11	-4.45416	-2.15515	2.76471e-18	8.63808e-17	3.85822	2.79683	4.94748	3.79735	3.9191	2.75274	2.79171	2.84605	5.05243	4.78348	5.00652
-1.44819	-1.47044	0.924139	1.00308	0.883053	0.0523485	0.247374	-0.191361	AGRN	chr1	1020120	1020373	+	10761	agrin	GO:0007010cytoskeletonorganization//GO:0007165signaltransduction//GO:0007213Gprotein-coupledacetylcholinereceptorsignalingpathway//GO:0007528neuromuscularjunctiondevelopment//GO:0009887animalorganmorphogenesis//GO:0009888tissuedevelopment//GO:0043113receptorclustering//GO:0043547positiveregulationofGTPaseactivity//GO:0045162clusteringofvoltage-gatedsodiumchannels//GO:0045887positiveregulationofsy…	GO:0005576extracellularregion//GO:0005604basementmembrane//GO:0005796Golgilumen//GO:0005886plasmamembrane//GO:0016021integralcomponentofmembrane//GO:0043202lysosomallumen//GO:0045202synapse//GO:0062023collagen-containingextracellularmatrix//GO:0070062extracellularexosome	GO:0002162dystroglycanbinding//GO:0005200structuralconstituentofcytoskeleton//GO:0005201extracellularmatrixstructuralconstituent//GO:0005509calciumionbinding//GO:0005515proteinbinding//GO:0033691sialicacidbinding//GO:0035374chondroitinsulfatebinding//GO:0043236lamininbinding//GO:0043395heparansulfateproteoglycanbinding	1.41816	0.504017	2.4614e-13	8.26419e-12	1.24311	0.313951	3.19678e-09	1.95015e-08	1.14082	0.190066	1.22351e-06	3.92741e-06	8.63576	9.13969	8.95027	8.6381	8.63342	9.13703	9.15364	9.12839	8.95368	8.9947	8.90243
-0.127013	-0.747873	0.810755	1.36178	1.22815	-0.559926	-0.70134	-1.26453	AGT	chr1	230690776	230694439	-	12703	angiotensinogen	GO:0001558regulationofcellgrowth//GO:0001819positiveregulationofcytokineproduction//GO:0001822kidneydevelopment//GO:0001974bloodvesselremodeling//GO:0002016regulationofbloodvolumebyrenin-angiotensin//GO:0002018renin-angiotensinregulationofaldosteroneproduction//GO:0002019regulationofrenaloutputbyangiotensin//GO:0002027regulationofheartrate//GO:0002034maintenanceofbloodvesseldiameterhomeostasisbyr…	GO:0005576extracellularregion//GO:0005615extracellularspace//GO:0005829cytosol//GO:0062023collagen-containingextracellularmatrix//GO:0070062extracellularexosome//GO:0072562bloodmicroparticle	GO:0004867serine-typeendopeptidaseinhibitoractivity//GO:0005179hormoneactivity//GO:0005515proteinbinding//GO:0008083growthfactoractivity//GO:0031702type1angiotensinreceptorbinding//GO:0031703type2angiotensinreceptorbinding	1.49098	0.576262	5.93296e-05	0.000207835	-1.11579	-0.158071	0.241775	0.32715	1.66363	0.734333	1.09214e-06	3.53684e-06	1.95634	2.54177	1.80561	2.07202	1.84066	2.42148	2.62682	2.57702	1.9107	1.858	1.64813
-0.293602	-0.486499	1.31293	1.34105	0.823402	-1.004	-0.979507	-0.713779	AGTPBP1	chr9	85546539	85547286	-	4939	ATP/GTP binding carboxypeptidase 1	GO:0001754eyephotoreceptorcelldifferentiation//GO:0006508proteolysis//GO:0007005mitochondrionorganization//GO:0007628adultwalkingbehavior//GO:0008285negativeregulationofcellpopulationproliferation//GO:0021702cerebellarPurkinjecelldifferentiation//GO:0021772olfactorybulbdevelopment//GO:0021954centralnervoussystemneurondevelopment//GO:0035608proteindeglutamylation//GO:0035609C-terminalproteindeglut…	GO:0005634nucleus//GO:0005730nucleolus//GO:0005737cytoplasm//GO:0005739mitochondrion//GO:0005829cytosol//GO:0043231intracellularmembrane-boundedorganelle//GO:1904115axoncytoplasm	GO:0004181metallocarboxypeptidaseactivity//GO:0008270zincionbinding//GO:0015631tubulinbinding	1.33335	0.415051	2.20502e-07	1.34657e-06	-1.09724	-0.133882	0.0372916	0.0646421	1.463	0.548932	5.21045e-10	2.8645e-09	4.69611	5.10783	4.56083	4.72174	4.67048	5.14871	5.15618	5.01861	4.53295	4.53945	4.61008
0.221652	0.700001	0.82508	0.703551	0.970613	-0.916736	-0.823583	-1.68058	AGTRAP	chr1	11736084	11736235	+	2435	angiotensin II receptor associated protein	GO:0001666responsetohypoxia//GO:0008217regulationofbloodpressure//GO:0038166angiotensin-activatedsignalingpathway	GO:0000139Golgimembrane//GO:0005789endoplasmicreticulummembrane//GO:0005794Golgiapparatus//GO:0005886plasmamembrane//GO:0005938cellcortex//GO:0016021integralcomponentofmembrane//GO:0030659cytoplasmicvesiclemembrane//GO:0043231intracellularmembrane-boundedorganelle	GO:0004945angiotensintypeIIreceptoractivity//GO:0005515proteinbinding	1.05621	0.0788946	0.173871	0.251198	-1.26982	-0.34462	8.40783e-06	2.94217e-05	1.34119	0.423515	7.2252e-08	2.80607e-07	5.05922	5.13864	4.71766	5.0082	5.11025	5.13693	5.111	5.16798	4.76535	4.78522	4.6024
1.06626	1.64436	0.173005	-0.244777	-0.887244	-0.0752174	-0.178136	-1.49825	AGXT	chr2	240868824	240869030	+	4114	alanine--glyoxylate and serine--pyruvate aminotransferase	GO:0009436glyoxylatecatabolicprocess//GO:0019265glycinebiosyntheticprocess,bytransaminationofglyoxylate//GO:0019448L-cysteinecatabolicprocess//GO:0042853L-alaninecatabolicprocess//GO:0042866pyruvatebiosyntheticprocess//GO:0046487glyoxylatemetabolicprocess//GO:0051384responsetoglucocorticoid//GO:0051591responsetocAMP	GO:0005759mitochondrialmatrix//GO:0005777peroxisome//GO:0005782peroxisomalmatrix//GO:0005829cytosol//GO:0043231intracellularmembrane-boundedorganelle	GO:0004760serine-pyruvatetransaminaseactivity//GO:0005515proteinbinding//GO:0008453alanine-glyoxylatetransaminaseactivity//GO:0008483transaminaseactivity//GO:0016597aminoacidbinding//GO:0030170pyridoxalphosphatebinding//GO:0042802identicalproteinbinding//GO:0042803proteinhomodimerizationactivity//GO:0043621proteinself-association	-1.85795	-0.893708	0.00055567	0.0015749	-2.12632	-1.08836	0.00016433	0.000464776	1.14445	0.194653	0.437688	0.510769	0.664741	-0.258027	-0.403575	0.505499	0.823984	0.0133951	-0.216766	-0.57071	-0.123354	-0.180053	-0.907318
1.50041	1.60174	-0.203904	-0.301832	-0.314738	-1.12124	-0.682592	-0.477847	AHCTF1	chr1	246839098	246840998	-	9579	AT-hook containing transcription factor 1	GO:0007049cellcycle//GO:0015031proteintransport//GO:0032465regulationofcytokinesis//GO:0051028mRNAtransport//GO:0051292nuclearporecomplexassembly//GO:0051301celldivision	GO:0000776kinetochore//GO:0000785chromatin//GO:0005634nucleus//GO:0005654nucleoplasm//GO:0005829cytosol//GO:0016363nuclearmatrix//GO:0031965nuclearmembrane//GO:0070062extracellularexosome	GO:0003677DNAbinding	-1.40385	-0.489387	5.64439e-10	6.67566e-09	-1.53562	-0.618826	1.1887e-11	1.10906e-10	1.09387	0.129439	0.00902604	0.0158552	6.24045	5.75027	5.61942	6.22684	6.25406	5.76897	5.74266	5.73919	5.52252	5.64037	5.69537
0.810256	1.50779	0.133725	-0.71913	-0.513493	0.948764	-0.980811	-1.1871	AHCTF1P1	chr2	161500885	161507705	-	6821	AT-hook containing transcription factor 1 pseudogene 1				-1.6124	-0.689212	0.0437486	0.0777167	-1.67852	-0.747187	0.0391924	0.067565	1.041	0.0579747	0.866742	0.892972	-0.945365	-1.65319	-1.67179	-1.10721	-0.783521	-1.42115	-1.81692	-1.72149	-1.04293	-1.93835	-2.03408
1.26351	1.17674	-1.05062	-0.920236	-1.30375	0.572452	0.187624	0.0742761	AHCY	chr20	34280268	34281165	-	3894	adenosylhomocysteinase	GO:0001666responsetohypoxia//GO:0002439chronicinflammatoryresponsetoantigenicstimulus//GO:0006730one-carbonmetabolicprocess//GO:0007584responsetonutrient//GO:0019510S-adenosylhomocysteinecatabolicprocess//GO:0033353S-adenosylmethioninecycle//GO:0042745circadiansleep/wakecycle	GO:0005634nucleus//GO:0005829cytosol//GO:0042470melanosome//GO:0043005neuronprojection//GO:0070062extracellularexosome	GO:0004013adenosylhomocysteinaseactivity//GO:0005515proteinbinding//GO:0030554adenylnucleotidebinding//GO:0042802identicalproteinbinding//GO:0051287NADbinding	-1.40647	-0.49208	4.00592e-12	8.91152e-11	-1.15005	-0.201701	1.47701e-05	4.99068e-05	-1.22296	-0.290379	1.58041e-08	6.81514e-08	8.53287	8.04001	8.33203	8.54212	8.52362	8.04873	8.07653	7.99476	8.39478	8.31273	8.28857
0.447142	0.514593	1.01189	1.0402	0.514823	-1.11572	-1.1419	-1.27103	AHCYL1	chr1	109984765	109985172	+	5035	adenosylhomocysteinase like 1	GO:0006378mRNApolyadenylation//GO:0006611proteinexportfromnucleus//GO:0006730one-carbonmetabolicprocess//GO:0006915apoptoticprocess//GO:0010765positiveregulationofsodiumiontransport//GO:0031440regulationofmRNA3'-endprocessing//GO:0032412regulationofiontransmembranetransporteractivity//GO:0033353S-adenosylmethioninecycle//GO:0038166angiotensin-activatedsignalingpathway//GO:0042045epithelialfluidtr…	GO:0005737cytoplasm//GO:0005789endoplasmicreticulummembrane//GO:0005829cytosol//GO:0016324apicalplasmamembrane//GO:0044233mitochondria-associatedendoplasmicreticulummembrane//GO:0070062extracellularexosome	GO:0003723RNAbinding//GO:0005515proteinbinding//GO:0042802identicalproteinbinding	1.0359	0.0508888	0.155322	0.228626	-1.16511	-0.220464	3.00335e-06	1.12865e-05	1.20694	0.271353	1.96217e-08	8.31933e-08	7.91519	7.96501	7.69491	7.91071	7.91967	7.98578	7.98954	7.9197	7.70295	7.69947	7.68231
-1.69735	-1.42227	0.8633	0.412768	0.0386923	0.36542	0.788447	0.650997	AHCYL2	chr7	129225030	129225439	+	6851	adenosylhomocysteinase like 2	GO:0006730one-carbonmetabolicprocess//GO:0033353S-adenosylmethioninecycle	GO:0005783endoplasmicreticulum//GO:0005829cytosol//GO:0043005neuronprojection	GO:0005515proteinbinding	1.28067	0.356898	1.49633e-07	9.50407e-07	1.30424	0.383204	5.90691e-08	2.9223e-07	-1.0184	-0.0263063	0.534067	0.604574	6.0119	6.36569	6.39462	5.98755	6.03626	6.44095	6.36118	6.29494	6.35279	6.4277	6.40336
-0.202382	0.269131	-0.910303	1.19542	0.902915	1.02213	-1.43573	-0.841189	AHCYP2	chr9	120720673	120721972	+	1300	adenosylhomocysteinase pseudogene 2				1.12707	0.17258	0.780588	0.835365	-1.23278	-0.30192	0.65686	0.731859	1.38944	0.4745	0.429203	0.502321	-3.39721	-3.16869	-3.68182	-3.54578	-3.24864	-3.9919	-2.66491	-2.84925	-2.77412	-4.32301	-3.94835
0.427495	0.0691369	-1.25464	-0.992621	-1.17589	0.891104	0.968655	1.06676	AHDC1	chr1	27534035	27534916	-	8297	AT-hook DNA binding motif containing 1			GO:0003677DNAbinding//GO:0005515proteinbinding	-1.17153	-0.228394	0.000162199	0.000515822	1.08636	0.119503	0.0262904	0.0475595	-1.2727	-0.347898	1.3749e-07	5.09763e-07	5.05056	4.82285	5.16974	5.07993	5.02119	4.80424	4.84718	4.81714	5.15591	5.16862	5.1847
1.00313	1.32244	0.133967	-0.0829491	-0.227227	-1.86274	-0.7167	0.430085	AHI1	chr6	135283407	135285647	-	31596	Abelson helper integration site 1	GO:0001738morphogenesisofapolarizedepithelium//GO:0001947heartlooping//GO:0002092positiveregulationofreceptorinternalization//GO:0007169transmembranereceptorproteintyrosinekinasesignalingpathway//GO:0007417centralnervoussystemdevelopment//GO:0010842retinalayerformation//GO:0016192vesicle-mediatedtransport//GO:0030862positiveregulationofpolarizedepithelialcelldifferentiation//GO:0030902hindbrainde…	GO:0005813centrosome//GO:0005814centriole//GO:0005829cytosol//GO:0005911cell-celljunction//GO:0005912adherensjunction//GO:0005929cilium//GO:0036038MKScomplex//GO:0036064ciliarybasalbody//GO:0097730non-motilecilium	GO:0005515proteinbinding//GO:0042802identicalproteinbinding	-1.11388	-0.155594	0.017317	0.0344094	-1.17839	-0.236823	0.000996537	0.00245055	1.05792	0.0812285	0.167389	0.222166	5.28125	5.12424	5.0397	5.26073	5.30177	5.14901	5.12112	5.10258	4.89235	5.03966	5.18707
-1.29347	-0.268293	0.0757437	-1.37255	0.249413	0.479073	0.430616	1.69947	AHI1-DT	chr6	135497422	135498000	+	16311	AHI1 divergent transcript				1.15569	0.208758	0.536151	0.625233	1.74115	0.80004	0.0213655	0.0395091	-1.50659	-0.591282	0.0402827	0.0621356	-1.24698	-1.04234	-0.464634	-1.48993	-1.00402	-0.840957	-1.52741	-0.758643	-0.64979	-0.672757	-0.0713562
0.516726	0.672841	-1.04478	-1.31819	-1.13978	0.275775	1.00393	1.03347	AHNAK	chr11	62433542	62433891	-	19466	AHNAK nucleoprotein	GO:0043484regulationofRNAsplicing//GO:1901385regulationofvoltage-gatedcalciumchannelactivity	GO:0005634nucleus//GO:0005737cytoplasm//GO:0005765lysosomalmembrane//GO:0005829cytosol//GO:0005886plasmamembrane//GO:0005925focaladhesion//GO:0015629actincytoskeleton//GO:0016020membrane//GO:0030315T-tubule//GO:0031982vesicle//GO:0042383sarcolemma//GO:0043034costamere//GO:0044291cell-cellcontactzone//GO:0045121membraneraft//GO:0070062extracellularexosome	GO:0003723RNAbinding//GO:0005515proteinbinding//GO:0044548S100proteinbinding//GO:0045296cadherinbinding//GO:0097493structuralmoleculeactivityconferringelasticity	-1.97457	-0.981535	2.27642e-11	3.99634e-10	1.073	0.101651	0.197375	0.274939	-2.11871	-1.08319	5.23009e-13	5.02666e-12	7.80959	6.8266	7.90792	7.76606	7.85313	6.8951	6.7426	6.84211	7.63166	8.03781	8.05428
-1.24847	-1.56229	-0.139195	0.0312016	-0.0648394	0.943962	0.970139	1.06949	AHNAK2	chr14	104937244	104955141	-	18788	AHNAK nucleoprotein 2	GO:0043484regulationofRNAsplicing	GO:0005634nucleus//GO:0005737cytoplasm//GO:0005829cytosol//GO:0005886plasmamembrane//GO:0030315T-tubule//GO:0042383sarcolemma	GO:0005515proteinbinding	4.44901	2.15349	2.83734e-06	1.34493e-05	14.4653	3.85453	7.20292e-11	5.80783e-10	-3.25135	-1.70104	2.46353e-10	1.43285e-09	-2.16286	-7.60128e-05	1.68831	-1.91107	-2.41465	-0.130995	0.142443	-0.0116759	1.60717	1.64917	1.8086
-1.0505	-1.69607	-0.0253871	0.134956	-0.248329	0.786928	0.80591	1.29249	AHR	chr7	16916359	16916388	+	8051	aryl hydrocarbon receptor	GO:0001568bloodvesseldevelopment//GO:0002819regulationofadaptiveimmuneresponse//GO:0002841negativeregulationofTcellmediatedimmuneresponsetotumorcell//GO:0006355regulationoftranscription,DNA-templated//GO:0006357regulationoftranscriptionbyRNApolymeraseII//GO:0006805xenobioticmetabolicprocess//GO:0006915apoptoticprocess//GO:0007049cellcycle//GO:0009410responsetoxenobioticstimulus//GO:0009636respons…	GO:0000785chromatin//GO:0005634nucleus//GO:0005654nucleoplasm//GO:0005667transcriptionregulatorcomplex//GO:0005737cytoplasm//GO:0005829cytosol//GO:0032991protein-containingcomplex//GO:0034751arylhydrocarbonreceptorcomplex//GO:0034752cytosolicarylhydrocarbonreceptorcomplex	GO:0000976transcriptioncis-regulatoryregionbinding//GO:0000981DNA-bindingtranscriptionfactoractivity,RNApolymeraseII-specific//GO:0000987cis-regulatoryregionsequence-specificDNAbinding//GO:0001094TFIID-classtranscriptionfactorcomplexbinding//GO:0001223transcriptioncoactivatorbinding//GO:0003677DNAbinding//GO:0003700DNA-bindingtranscriptionfactoractivity//GO:0004879nuclearreceptoractivity//GO:0005…	1.24155	0.312148	3.35485e-06	1.56537e-05	1.46326	0.549188	2.91532e-10	2.11005e-09	-1.17857	-0.23704	2.20255e-05	5.83856e-05	6.06376	6.37524	6.61184	6.13952	5.98799	6.38013	6.41777	6.3278	6.5708	6.57525	6.68946
-1.23683	-1.66339	0.624837	-0.365997	0.925031	0.145311	0.600968	0.970074	AHRR	chr5	321714	321819	+	9480	aryl-hydrocarbon receptor repressor	GO:0006357regulationoftranscriptionbyRNApolymeraseII//GO:0006805xenobioticmetabolicprocess//GO:0030522intracellularreceptorsignalingpathway	GO:0000785chromatin//GO:0005634nucleus//GO:0005654nucleoplasm//GO:0005829cytosol//GO:0034751arylhydrocarbonreceptorcomplex	GO:0000976transcriptioncis-regulatoryregionbinding//GO:0000981DNA-bindingtranscriptionfactoractivity,RNApolymeraseII-specific//GO:0004879nuclearreceptoractivity//GO:0005515proteinbinding//GO:0046983proteindimerizationactivity	1.97527	0.982047	0.0112998	0.0235762	2.12899	1.09017	0.00640971	0.0133759	-1.07782	-0.108122	0.685524	0.740253	-1.93036	-0.944948	-0.850136	-1.81643	-2.04429	-0.821974	-1.35125	-0.661618	-1.07812	-0.834725	-0.637558
1.53112	1.48364	-1.0175	-0.710163	-0.727079	0.225579	-0.277216	-0.508379	AHSA1	chr14	77457870	77457982	+	2944	activator of HSP90 ATPase activity 1	GO:0006457proteinfolding//GO:0032781positiveregulationofATPaseactivity//GO:0050790regulationofcatalyticactivity	GO:0005783endoplasmicreticulum//GO:0005829cytosol//GO:0070062extracellularexosome	GO:0001671ATPaseactivatoractivity//GO:0005515proteinbinding//GO:0045296cadherinbinding//GO:0051087chaperonebinding//GO:0051879Hsp90proteinbinding	-1.24355	-0.314463	2.95195e-08	2.24719e-07	-1.17231	-0.229357	4.70335e-06	1.71216e-05	-1.06077	-0.0851061	0.0229379	0.0371206	7.53837	7.22469	7.30988	7.54158	7.53517	7.19782	7.23927	7.23699	7.36548	7.29767	7.26649
-0.457332	-0.82832	-0.111463	-1.1789	-0.397147	0.0101666	1.20311	1.75989	AHSA2P	chr2	61177418	61178384	+	9083	activator of HSP90 ATPase homolog 2, pseudogene	GO:0006457proteinfolding//GO:0032781positiveregulationofATPaseactivity//GO:0050790regulationofcatalyticactivity	GO:0005829cytosol	GO:0001671ATPaseactivatoractivity//GO:0005515proteinbinding//GO:0051087chaperonebinding//GO:0051879Hsp90proteinbinding	1.00895	0.0128531	0.830923	0.874696	1.17954	0.23823	0.000624709	0.00159704	-1.16908	-0.225377	0.000343318	0.00076087	5.90481	5.91639	6.14038	5.93155	5.87806	5.98142	5.82751	5.94023	5.99896	6.17096	6.25123
0.136153	-0.266479	1.10276	1.096	1.01253	-0.948737	-1.44993	-0.682302	AIDA	chr1	222668013	222669989	-	4232	axin interactor, dorsalization associated	GO:0009953dorsal/ventralpatternformation//GO:0031333negativeregulationofprotein-containingcomplexassembly//GO:0043508negativeregulationofJUNkinaseactivity//GO:0046329negativeregulationofJNKcascade//GO:0048264determinationofventralidentity	GO:0005575cellular_component//GO:0005737cytoplasm//GO:0016020membrane	GO:0005515proteinbinding//GO:0019904proteindomainspecificbinding//GO:0035091phosphatidylinositolbinding	1.20652	0.270849	3.61236e-05	0.000133026	-1.17102	-0.227767	0.000486013	0.00126427	1.41286	0.498616	9.28706e-10	4.88256e-09	5.31141	5.58193	5.08228	5.35937	5.26345	5.58963	5.58802	5.56814	5.10092	4.98153	5.16439
-0.397971	-1.76336	0.698924	0.607341	-0.794932	-0.251836	0.52021	1.38162	AIDAP2	chr4	158270378	158271563	+	3616	AIDA pseudogene 2				1.71334	0.77681	0.101775	0.160377	1.97739	0.983595	0.0433517	0.0738545	-1.15411	-0.206785	0.561159	0.630522	-2.41518	-1.67695	-1.45299	-2.01235	-2.81801	-1.36512	-1.41916	-2.24658	-1.92612	-1.47057	-0.962285
0.102661	0.0840993	1.02674	1.05268	1.04406	-1.08272	-0.91782	-1.3097	AIF1L	chr9	131096476	131096660	+	5299	allograft inflammatory factor 1 like	GO:0051017actinfilamentbundleassembly//GO:0097178ruffleassembly	GO:0005737cytoplasm//GO:0005884actinfilament//GO:0005925focaladhesion//GO:0015629actincytoskeleton//GO:0032587rufflemembrane//GO:0032991protein-containingcomplex//GO:0070062extracellularexosome	GO:0005509calciumionbinding//GO:0051015actinfilamentbinding	3.30334	1.72393	1.07311e-12	2.91836e-11	-4.57122	-2.19258	8.0427e-10	5.41363e-09	15.1003	3.91651	9.34137e-16	1.59721e-14	1.38168	3.10741	-0.797443	1.39858	1.36479	3.08114	3.12839	3.11269	-0.759763	-0.459513	-1.17305
0.844944	0.76943	-1.20573	-1.15481	-1.24546	0.811125	0.570435	0.610067	AIFM1	chrX	130124666	130125792	-	13092	apoptosis inducing factor mitochondria associated 1	GO:0002931responsetoischemia//GO:0006915apoptoticprocess//GO:0006919activationofcysteine-typeendopeptidaseactivityinvolvedinapoptoticprocess//GO:0009636responsetotoxicsubstance//GO:0012501programmedcelldeath//GO:0030261chromosomecondensation//GO:0033108mitochondrialrespiratorychaincomplexassembly//GO:0043065positiveregulationofapoptoticprocess//GO:0043525positiveregulationofneuronapoptoticprocess…	GO:0005634nucleus//GO:0005737cytoplasm//GO:0005739mitochondrion//GO:0005743mitochondrialinnermembrane//GO:0005758mitochondrialintermembranespace//GO:0005829cytosol//GO:0048471perinuclearregionofcytoplasm	GO:0003677DNAbinding//GO:0003954NADHdehydrogenaseactivity//GO:0005515proteinbinding//GO:0016174NAD(P)HoxidaseH2O2-formingactivity//GO:0016651oxidoreductaseactivity,actingonNAD(P)H//GO:0046983proteindimerizationactivity//GO:0071949FADbinding	-1.91586	-0.937991	1.41341e-16	1.62057e-14	-1.04805	-0.0677126	0.111364	0.168143	-1.82802	-0.870279	1.21098e-16	2.51841e-15	7.05193	6.11367	6.985	7.06956	7.03429	6.11193	6.13571	6.09338	7.05376	6.94137	6.95987
0.261092	0.303786	-1.0381	-1.22565	-1.19068	1.13246	0.967369	0.789725	AIFM2	chr10	70098223	70099619	-	5135	apoptosis inducing factor mitochondria associated 2	GO:0006743ubiquinonemetabolicprocess//GO:0008637apoptoticmitochondrialchanges//GO:0022904respiratoryelectrontransportchain//GO:0043065positiveregulationofapoptoticprocess//GO:0110076negativeregulationofferroptosis//GO:1900407regulationofcellularresponsetooxidativestress	GO:0005615extracellularspace//GO:0005634nucleus//GO:0005737cytoplasm//GO:0005739mitochondrion//GO:0005741mitochondrialoutermembrane//GO:0005811lipiddroplet//GO:0005829cytosol//GO:0005886plasmamembrane//GO:0016021integralcomponentofmembrane	GO:0003677DNAbinding//GO:0004174electron-transferring-flavoproteindehydrogenaseactivity//GO:0005515proteinbinding//GO:0016655oxidoreductaseactivity,actingonNAD(P)H,quinoneorsimilarcompoundasacceptor//GO:0050660flavinadeninedinucleotidebinding	-1.42461	-0.510569	3.76029e-10	4.66332e-09	1.18245	0.241775	3.27334e-05	0.000103723	-1.68453	-0.752344	2.3894e-14	3.01364e-13	5.87425	5.36207	6.1174	5.86662	5.88187	5.40256	5.33557	5.34806	6.17787	6.1189	6.05544
1.1523	1.03849	-1.16647	-1.19213	-1.11906	0.364143	0.435981	0.486763	AIFM3	chr22	20965108	20965207	+	5260	apoptosis inducing factor mitochondria associated 3	GO:0097194executionphaseofapoptosis	GO:0005737cytoplasm//GO:0005739mitochondrion//GO:0005743mitochondrialinnermembrane//GO:0005783endoplasmicreticulum//GO:0005829cytosol	GO:0016491oxidoreductaseactivity//GO:0016651oxidoreductaseactivity,actingonNAD(P)H//GO:0046872metalionbinding//GO:0050660flavinadeninedinucleotidebinding//GO:00515372iron,2sulfurclusterbinding	-3.11985	-1.64147	5.29927e-20	2.70616e-17	-1.39844	-0.483817	6.72071e-10	4.57877e-09	-2.23095	-1.15766	4.19401e-17	9.60901e-16	6.02898	4.38867	5.54413	6.07038	5.98758	4.3834	4.36473	4.41789	5.49697	5.54924	5.58618
-0.393197	0.0134023	1.25829	1.0711	1.04777	-1.11819	-0.919303	-0.959883	AIG1	chr6	143060496	143060653	+	8431	androgen induced 1	GO:0042758long-chainfattyacidcatabolicprocess	GO:0005886plasmamembrane//GO:0012505endomembranesystem//GO:0016020membrane//GO:0016021integralcomponentofmembrane	GO:0005515proteinbinding//GO:0016787hydrolaseactivity	1.19096	0.252131	2.57916e-05	9.83067e-05	-1.1125	-0.153805	0.00563635	0.011896	1.32495	0.405936	5.56006e-09	2.57965e-08	5.26065	5.51156	5.10632	5.22188	5.29942	5.53684	5.50114	5.49669	5.08361	5.12154	5.1138
1.00096	1.10241	-0.774646	-1.33837	-1.32551	0.285645	0.491937	0.557565	AIMP1	chr4	106315544	106315636	+	9258	aminoacyl tRNA synthetase complex interacting multifunctional protein 1	GO:0001525angiogenesis//GO:0001937negativeregulationofendothelialcellproliferation//GO:0006412translation//GO:0006915apoptoticprocess//GO:0006954inflammatoryresponse//GO:0007165signaltransduction//GO:0007267cell-cellsignaling//GO:0050900leukocytemigration//GO:0051607defenseresponsetovirus//GO:0070094positiveregulationofglucagonsecretion	GO:0005615extracellularspace//GO:0005634nucleus//GO:0005783endoplasmicreticulum//GO:0005794Golgiapparatus//GO:0005829cytosol//GO:0009986cellsurface//GO:0016020membrane//GO:0017101aminoacyl-tRNAsynthetasemultienzymecomplex	GO:0000049tRNAbinding//GO:0005125cytokineactivity//GO:0005515proteinbinding//GO:0042803proteinhomodimerizationactivity//GO:0051020GTPasebinding	-1.38657	-0.471522	3.4587e-10	4.32197e-09	-1.09453	-0.130312	0.00716595	0.0147689	-1.26682	-0.341209	2.59537e-08	1.08007e-07	6.6605	6.18622	6.52959	6.64956	6.67145	6.26639	6.14474	6.14752	6.4952	6.53971	6.55387
1.67775	1.433	-0.669041	-0.366097	-0.0293519	-0.484234	-0.563363	-0.998658	AIMP2	chr7	6009255	6009378	+	1828	aminoacyl tRNA synthetase complex interacting multifunctional protein 2	GO:0006412translation//GO:0006915apoptoticprocess//GO:0008285negativeregulationofcellpopulationproliferation//GO:0031398positiveregulationofproteinubiquitination//GO:0060510typeIIpneumocytedifferentiation//GO:0065003protein-containingcomplexassembly//GO:1901216positiveregulationofneurondeath//GO:1903632positiveregulationofaminoacyl-tRNAligaseactivity	GO:0005634nucleus//GO:0005829cytosol//GO:0016020membrane//GO:0017101aminoacyl-tRNAsynthetasemultienzymecomplex	GO:0005515proteinbinding//GO:0060090molecularadaptoractivity	-1.36634	-0.45032	5.80941e-08	4.09384e-07	-1.4379	-0.523966	8.55785e-09	4.83193e-08	1.05237	0.0736459	0.194632	0.253451	5.09533	4.65008	4.5738	5.12385	5.0668	4.57684	4.64745	4.72594	4.61992	4.60147	4.50001
-0.0154334	0.257219	-0.964285	-0.826853	-1.4121	1.13711	1.34164	0.482702	AIP	chr11	67468174	67468261	+	2961	aryl hydrocarbon receptor interacting protein	GO:0000413proteinpeptidyl-prolylisomerization//GO:0006626proteintargetingtomitochondrion//GO:0006805xenobioticmetabolicprocess//GO:0010738regulationofproteinkinaseAsignaling//GO:0022417proteinmaturationbyproteinfolding//GO:0045893positiveregulationoftranscription,DNA-templated//GO:0051344negativeregulationofcyclic-nucleotidephosphodiesteraseactivity	GO:0005654nucleoplasm//GO:0005737cytoplasm//GO:0005829cytosol//GO:0005886plasmamembrane//GO:0034751arylhydrocarbonreceptorcomplex	GO:0003713transcriptioncoactivatoractivity//GO:0003755peptidyl-prolylcis-transisomeraseactivity//GO:0005515proteinbinding//GO:0008134transcriptionfactorbinding//GO:0017162arylhydrocarbonreceptorbinding//GO:0036004GAFdomainbinding//GO:0051082unfoldedproteinbinding	-1.15423	-0.206927	0.000717737	0.00197836	1.11	0.150564	0.00890905	0.0179604	-1.2812	-0.357491	1.6942e-07	6.18372e-07	5.49601	5.2871	5.64826	5.47205	5.51997	5.30529	5.32944	5.22658	5.67462	5.71056	5.5596
-1.83017	-1.32568	0.374411	0.358505	0.416377	0.618234	0.923336	0.464985	AIRE	chr21	44285838	44286138	+	4678	autoimmune regulator	GO:0002458peripheralTcelltoleranceinduction//GO:0002509centraltoleranceinductiontoselfantigen//GO:0006355regulationoftranscription,DNA-templated//GO:0006417regulationoftranslation//GO:0006955immuneresponse//GO:0006959humoralimmuneresponse//GO:0032722positiveregulationofchemokineproduction//GO:0045060negativethymicTcellselection//GO:0045893positiveregulationoftranscription,DNA-templated//GO:004594…	GO:0005634nucleus//GO:0005737cytoplasm//GO:0016604nuclearbody	GO:0000977RNApolymeraseIItranscriptionregulatoryregionsequence-specificDNAbinding//GO:0003682chromatinbinding//GO:0005515proteinbinding//GO:0008270zincionbinding//GO:0042393histonebinding//GO:0042802identicalproteinbinding//GO:0045182translationregulatoractivity	6.39778	2.67757	1.81152e-05	7.12578e-05	8.35169	3.06207	2.78318e-06	1.05124e-05	-1.30541	-0.384498	0.108142	0.150732	-3.36178	-0.683795	-0.293568	-3.70625	-3.01732	-0.695658	-0.71738	-0.638349	-0.362692	0.0539584	-0.571969
-0.856658	-0.850273	1.12677	1.2507	1.18494	-0.745097	-0.296757	-0.813628	AJAP1	chr1	4654609	4655454	+	12528	adherens junctions associated protein 1	GO:0001953negativeregulationofcell-matrixadhesion//GO:0007155celladhesion//GO:0030860regulationofpolarizedepithelialcelldifferentiation//GO:0061045negativeregulationofwoundhealing	GO:0005912adherensjunction//GO:0009898cytoplasmicsideofplasmamembrane//GO:0009986cellsurface//GO:0016323basolateralplasmamembrane//GO:0016324apicalplasmamembrane//GO:0044214spanningcomponentofplasmamembrane//GO:0044291cell-cellcontactzone	GO:0005515proteinbinding//GO:0008013beta-cateninbinding//GO:0044877protein-containingcomplexbinding	116.251	6.86109	3.81503e-07	2.19448e-06	1.73073	0.79138	0.524416	0.614068	67.1686	6.06971	1.20409e-07	4.51385e-07	-7.78296	-0.909124	-6.99158	-7.79371	-7.77221	-1.11358	-0.696163	-0.917632	-7.41797	-5.90797	-7.64879
0.360153	0.564275	0.769471	-0.198597	1.2115	-1.5075	0.255007	-1.45432	AJM1	chr9	136842478	136842589	+	4642	apical junction component 1 homolog	GO:0045216cell-celljunctionorganization	GO:0005886plasmamembrane//GO:0005912adherensjunction//GO:0005929cilium//GO:0016324apicalplasmamembrane//GO:0043296apicaljunctioncomplex		1.01287	0.018448	0.782649	0.837069	-1.15057	-0.202351	0.00755791	0.0154837	1.16538	0.220799	0.00169166	0.00334461	5.29902	5.31851	5.09744	5.28394	5.3141	5.34441	5.2014	5.40971	5.00803	5.26841	5.01588
1.00601	0.847737	-0.850725	-0.987378	-1.51637	0.656328	0.914131	-0.0697366	AJUBA	chr14	22971177	22973568	-	5885	ajuba LIM protein	GO:0000122negativeregulationoftranscriptionbyRNApolymeraseII//GO:0001666responsetohypoxia//GO:0006355regulationoftranscription,DNA-templated//GO:0007010cytoskeletonorganization//GO:0007049cellcycle//GO:0016339calcium-dependentcell-celladhesionviaplasmamembranecelladhesionmolecules//GO:0030032lamellipodiumassembly//GO:0030334regulationofcellmigration//GO:0031328positiveregulationofcellularbiosynth…	GO:0000932P-body//GO:0005634nucleus//GO:0005654nucleoplasm//GO:0005667transcriptionregulatorcomplex//GO:0005794Golgiapparatus//GO:0005815microtubuleorganizingcenter//GO:0005829cytosol//GO:0005886plasmamembrane//GO:0005911cell-celljunction//GO:0005912adherensjunction//GO:0005925focaladhesion//GO:0030027lamellipodium	GO:0003682chromatinbinding//GO:0003714transcriptioncorepressoractivity//GO:0005515proteinbinding//GO:0045294alpha-cateninbinding//GO:0046872metalionbinding//GO:0051015actinfilamentbinding	-1.27037	-0.345243	1.29152e-06	6.62184e-06	-1.05305	-0.0745773	0.170284	0.242449	-1.20636	-0.270666	1.28548e-05	3.52509e-05	5.72066	5.3726	5.64805	5.73413	5.7072	5.41812	5.39486	5.30482	5.67462	5.7185	5.55104
-0.122985	-0.703548	-0.805989	-1.10123	-0.74539	1.08651	1.317	1.07564	AJUBA-DT	chr14	22982698	22983081	+	1462	AJUBA divergent transcript				-1.23577	-0.305414	0.12864	0.195139	2.01867	1.01341	6.87495e-06	2.44183e-05	-2.49462	-1.31882	3.19435e-08	1.3134e-07	0.398228	0.0941356	1.41393	0.585669	0.210788	0.14464	-0.0460024	0.18377	1.36666	1.51549	1.35964
-0.0578878	-0.18586	-0.892908	-1.10291	-1.10377	1.11115	1.16144	1.07074	AK1	chr9	127866486	127868076	-	2593	adenylate kinase 1	GO:0006165nucleosidediphosphatephosphorylation//GO:0006172ADPbiosyntheticprocess//GO:0009142nucleosidetriphosphatebiosyntheticprocess//GO:0015949nucleobase-containingsmallmoleculeinterconversion//GO:0046033AMPmetabolicprocess//GO:0046034ATPmetabolicprocess//GO:0046940nucleosidemonophosphatephosphorylation	GO:0001520outerdensefiber//GO:0005737cytoplasm//GO:0005829cytosol//GO:0070062extracellularexosome	GO:0004017adenylatekinaseactivity//GO:0004550nucleosidediphosphatekinaseactivity//GO:0005524ATPbinding	-1.50847	-0.593088	7.93562e-09	6.9365e-08	1.75572	0.812063	3.11105e-12	3.27344e-11	-2.64846	-1.40515	1.57958e-17	4.04424e-16	4.28284	3.68366	5.0957	4.32491	4.24077	3.7759	3.63782	3.63725	5.09353	5.1266	5.06696
1.56354	1.64612	-0.642113	-0.626607	-0.306568	-0.420339	-0.735669	-0.47836	AK2	chr1	33007986	33013402	-	17967	adenylate kinase 2	GO:0006172ADPbiosyntheticprocess//GO:0015949nucleobase-containingsmallmoleculeinterconversion//GO:0016310phosphorylation//GO:0046033AMPmetabolicprocess//GO:0046034ATPmetabolicprocess//GO:0046940nucleosidemonophosphatephosphorylation	GO:0005737cytoplasm//GO:0005739mitochondrion//GO:0005758mitochondrialintermembranespace//GO:0070062extracellularexosome//GO:0097226spermmitochondrialsheath	GO:0004017adenylatekinaseactivity//GO:0005515proteinbinding//GO:0005524ATPbinding	-1.47707	-0.562738	9.49762e-13	2.63593e-11	-1.4808	-0.566379	1.15405e-12	1.31876e-11	1.00253	0.00364052	0.921604	0.937391	7.67868	7.11744	7.11225	7.6678	7.68956	7.0866	7.09069	7.17502	7.14504	7.06195	7.12975
-1.09616	-1.63678	0.784227	1.35351	0.620251	0.0100543	-0.396333	0.361234	AK3	chr9	4709556	4713096	-	4395	adenylate kinase 3	GO:0006172ADPbiosyntheticprocess//GO:0007596bloodcoagulation//GO:0009142nucleosidetriphosphatebiosyntheticprocess//GO:0016310phosphorylation//GO:0046033AMPmetabolicprocess//GO:0046039GTPmetabolicprocess//GO:0046041ITPmetabolicprocess//GO:0046051UTPmetabolicprocess	GO:0005737cytoplasm//GO:0005739mitochondrion//GO:0005759mitochondrialmatrix	GO:0005515proteinbinding//GO:0005524ATPbinding//GO:0005525GTPbinding//GO:0046899nucleosidetriphosphateadenylatekinaseactivity	1.23422	0.303596	2.39981e-07	1.45317e-06	1.13354	0.180833	0.000299315	0.000807781	1.08882	0.122762	0.00315461	0.00596453	7.20524	7.50876	7.38558	7.24113	7.16935	7.49082	7.56641	7.46905	7.38802	7.33406	7.43465
-0.621665	0.522962	0.267294	-0.622069	1.02131	-1.62819	-0.37131	1.43167	AK3P3	chr7	23129178	23129841	+	664	adenylate kinase 3 pseudogene 3				1.23415	0.303516	0.718315	0.784361	-1.06745	-0.0941659	0.917767	0.939183	1.31739	0.397681	0.616077	0.680352	-3.93621	-3.61	-4.10432	-4.62378	-3.24864	-3.5558	-4.62427	-2.64994	-5.83301	-4.32301	-2.15693
0.983899	1.13107	-0.634665	-0.0932814	-1.69499	0.199004	0.89786	-0.7889	AK4	chr1	65147549	65147665	+	7578	adenylate kinase 4	GO:0001889liverdevelopment//GO:0002082regulationofoxidativephosphorylation//GO:0006165nucleosidediphosphatephosphorylation//GO:0006172ADPbiosyntheticprocess//GO:0007420braindevelopment//GO:0009142nucleosidetriphosphatebiosyntheticprocess//GO:0009410responsetoxenobioticstimulus//GO:0015949nucleobase-containingsmallmoleculeinterconversion//GO:0046033AMPmetabolicprocess//GO:0046034ATPmetabolicproces…	GO:0005737cytoplasm//GO:0005739mitochondrion//GO:0005759mitochondrialmatrix	GO:0004017adenylatekinaseactivity//GO:0004550nucleosidediphosphatekinaseactivity//GO:0005515proteinbinding//GO:0005524ATPbinding//GO:0005525GTPbinding//GO:0046899nucleosidetriphosphateadenylatekinaseactivity//GO:0050145nucleosidemonophosphatekinaseactivity	-1.17955	-0.238233	0.00346796	0.00817707	-1.09263	-0.127802	0.0997446	0.152819	-1.07955	-0.110431	0.122299	0.168299	4.07813	3.8351	3.95372	4.06854	4.08772	3.85764	3.92819	3.71948	3.96627	4.05733	3.83755
1.61193	0.23846	-1.30588	0.823936	0.088595	0.340716	-0.566666	-1.23109	AK4P1	chr17	31345519	31346190	+	672	adenylate kinase 4 pseudogene 1				-1.37387	-0.458244	0.304004	0.396774	-1.49707	-0.582144	0.223643	0.306405	1.08968	0.1239	0.783908	0.824521	-2.13881	-2.5631	-2.70552	-1.86297	-2.41465	-3.03497	-2.17949	-2.47485	-2.37358	-2.73805	-3.00493
-0.406197	0.530012	0.475454	0.965234	-2.05899	-0.677275	0.662322	0.509442	AK4P3	chr12	31615023	31616622	-	2112	adenylate kinase 4 pseudogene 3				-1.13363	-0.180955	0.824806	0.87005	1.09219	0.127227	0.875459	0.906909	-1.23815	-0.308183	0.681238	0.73618	-3.85708	-4.1303	-3.75216	-4.33428	-3.37989	-3.43551	-2.93621	-6.01917	-4.61062	-3.24501	-3.40086
0.85936	0.848391	0.492727	0.965088	0.336079	-1.26383	-1.39589	-0.841923	AK6	chr5	69350984	69352253	-	2140	adenylate kinase 6	GO:0015949nucleobase-containingsmallmoleculeinterconversion//GO:0016310phosphorylation//GO:0046940nucleosidemonophosphatephosphorylation	GO:0005634nucleus//GO:0005654nucleoplasm//GO:0005737cytoplasm//GO:0005813centrosome//GO:0005829cytosol//GO:0015030Cajalbody//GO:0016020membrane//GO:0016607nuclearspeck	GO:0004017adenylatekinaseactivity//GO:0005515proteinbinding//GO:0005524ATPbinding//GO:0050145nucleosidemonophosphatekinaseactivity	-1.04148	-0.0586357	0.310189	0.403313	-1.38079	-0.465492	1.12514e-07	5.32119e-07	1.32579	0.406856	2.16054e-07	7.76374e-07	4.87899	4.81978	4.41133	4.88026	4.87772	4.79543	4.90473	4.75918	4.38898	4.35842	4.4866
0.851568	0.796842	0.676714	0.559977	0.619269	-1.47096	-0.660499	-1.37291	AK7	chr14	96392128	96392259	+	4984	adenylate kinase 7	GO:0006165nucleosidediphosphatephosphorylation//GO:0009142nucleosidetriphosphatebiosyntheticprocess//GO:0030030cellprojectionorganization//GO:0046940nucleosidemonophosphatephosphorylation	GO:0005737cytoplasm//GO:0005829cytosol//GO:0031514motilecilium	GO:0004017adenylatekinaseactivity//GO:0004127cytidylatekinaseactivity//GO:0004550nucleosidediphosphatekinaseactivity//GO:0005524ATPbinding	-1.114	-0.155751	0.349003	0.445115	-2.90115	-1.53662	3.80606e-07	1.64994e-06	2.60426	1.38087	8.99502e-07	2.94957e-06	0.889117	0.730783	-0.645547	0.910194	0.868039	0.775506	0.685585	0.731257	-0.878816	-0.254531	-0.803295
-0.709327	-1.09435	1.12704	0.0789622	1.11888	-0.285434	-1.27149	1.03573	AK8	chr9	132725578	132725925	-	2731	adenylate kinase 8	GO:0006165nucleosidediphosphatephosphorylation//GO:0009142nucleosidetriphosphatebiosyntheticprocess//GO:0021591ventricularsystemdevelopment//GO:0046940nucleosidemonophosphatephosphorylation	GO:0005737cytoplasm//GO:0005829cytosol//GO:0005930axoneme//GO:0036126spermflagellum//GO:00977299+2motilecilium	GO:0004017adenylatekinaseactivity//GO:0004127cytidylatekinaseactivity//GO:0004550nucleosidediphosphatekinaseactivity//GO:0005515proteinbinding//GO:0005524ATPbinding//GO:0016208AMPbinding	1.87276	0.905168	0.0530479	0.0918229	1.33103	0.412546	0.400712	0.495822	1.407	0.492622	0.202906	0.263016	-2.53954	-1.63908	-2.14854	-2.43616	-2.64292	-1.45001	-2.01284	-1.45439	-2.20852	-2.73805	-1.49904
-0.545865	0.545852	1.14814	0.90556	1.01503	-1.00831	-1.24953	-0.81087	AK9	chr6	109492855	109493571	-	10099	adenylate kinase 9	GO:0006174dADPphosphorylation//GO:0006186dGDPphosphorylation//GO:0006756AMPphosphorylation//GO:0006757ATPgenerationfromADP//GO:0061508CDPphosphorylation//GO:0061565dAMPphosphorylation//GO:0061566CMPphosphorylation//GO:0061567dCMPphosphorylation//GO:0061568GDPphosphorylation//GO:0061569UDPphosphorylation//GO:0061570dCDPphosphorylation//GO:0061571TDPphosphorylation	GO:0005634nucleus//GO:0005654nucleoplasm//GO:0005737cytoplasm//GO:0005739mitochondrion//GO:0005829cytosol//GO:0031965nuclearmembrane	GO:0004017adenylatekinaseactivity//GO:0004550nucleosidediphosphatekinaseactivity//GO:0005524ATPbinding//GO:0050145nucleosidemonophosphatekinaseactivity	1.16863	0.224822	0.0127136	0.026151	-1.16502	-0.220358	0.0238291	0.0435082	1.36148	0.44518	1.30282e-05	3.56967e-05	3.11538	3.33789	2.89287	2.99664	3.23412	3.36514	3.31237	3.33618	2.89604	2.84357	2.93899
-0.927048	-0.91826	0.804877	1.29033	1.24663	0.175418	-0.804129	-0.867821	AKAIN1	chr18	5142911	5145755	-	3117	A-kinase anchor inhibitor 1	GO:0008104proteinlocalization		GO:0005515proteinbinding//GO:0051018proteinkinaseAbinding	30.4316	4.9275	0.00014078	0.000454053	2.05201	1.03704	0.439171	0.53358	14.8302	3.89047	0.000262096	0.000590776	-7.78296	-2.79953	-6.74592	-7.79371	-7.77221	-3.5558	-2.36793	-2.47485	-5.09605	-7.49294	-7.64879
0.855792	0.708588	-1.18116	-1.3932	-1.00903	0.739598	0.791011	0.488401	AKAP1	chr17	57085092	57085158	+	5340	A-kinase anchoring protein 1	GO:0006915apoptoticprocess//GO:0140374antiviralinnateimmuneresponse	GO:0005739mitochondrion//GO:0005741mitochondrialoutermembrane//GO:0005829cytosol//GO:0016020membrane//GO:0016021integralcomponentofmembrane	GO:0003723RNAbinding//GO:0005515proteinbinding//GO:0034237proteinkinaseAregulatorysubunitbinding	-1.20318	-0.266858	1.41329e-07	9.01903e-07	-1.01051	-0.0150907	0.672968	0.745544	-1.19066	-0.251767	7.91888e-08	3.05688e-07	7.73398	7.46746	7.71926	7.7439	7.72406	7.46925	7.44066	7.49246	7.72824	7.73517	7.69437
-0.850065	-1.17305	1.0168	1.00329	1.39953	-0.461285	-0.112586	-0.822634	AKAP1-DT	chr17	57071814	57072498	-	2008	AKAP1 divergent transcript				1.79468	0.843729	9.77772e-07	5.14876e-06	1.15744	0.210937	0.142733	0.208386	1.55056	0.632792	9.45326e-06	2.64728e-05	1.44393	2.29461	1.65984	1.50779	1.38008	2.24594	2.2406	2.39728	1.66151	1.79939	1.51863
-1.05755	-0.941808	-0.0726762	-0.529034	-0.741555	0.719078	1.62877	0.994772	AKAP10	chr17	19904302	19906232	-	4839	A-kinase anchoring protein 10	GO:0007165signaltransduction//GO:0008104proteinlocalization	GO:0005739mitochondrion//GO:0005829cytosol//GO:0005886plasmamembrane//GO:0032991protein-containingcomplex	GO:0005515proteinbinding//GO:0051018proteinkinaseAbinding	1.05229	0.0735285	0.191468	0.271685	1.20679	0.271178	6.25978e-05	0.00018945	-1.14683	-0.197649	0.000517521	0.00111417	4.78143	4.85217	5.05237	4.77401	4.78884	4.90024	4.84175	4.81451	5.00172	5.11832	5.03706
0.0543392	0.210633	1.10119	1.07318	0.734583	-1.69364	-0.94591	-0.534372	AKAP11	chr13	42272152	42272228	+	9915	A-kinase anchoring protein 11	GO:0003091renalwaterhomeostasis//GO:0008104proteinlocalization//GO:0030866corticalactincytoskeletonorganization//GO:0035556intracellularsignaltransduction//GO:0036010proteinlocalizationtoendosome	GO:0005730nucleolus//GO:0005737cytoplasm//GO:0005815microtubuleorganizingcenter//GO:0005829cytosol//GO:0005886plasmamembrane	GO:0005515proteinbinding//GO:0008157proteinphosphatase1binding//GO:0034237proteinkinaseAregulatorysubunitbinding//GO:0051018proteinkinaseAbinding	1.12831	0.174167	0.00256664	0.00623349	-1.18335	-0.242881	0.000156233	0.000443786	1.33519	0.417048	1.19323e-08	5.23889e-08	6.35306	6.52576	6.10748	6.33694	6.36918	6.55289	6.54712	6.47727	5.97635	6.1306	6.2155
-1.42503	0.000704563	0.998319	1.01258	0.980461	-0.279726	0.0909134	-1.37822	AKAP12	chr6	151239967	151240059	+	8775	A-kinase anchoring protein 12	GO:0007186Gprotein-coupledreceptorsignalingpathway//GO:0007193adenylatecyclase-inhibitingGprotein-coupledreceptorsignalingpathway//GO:0010738regulationofproteinkinaseAsignaling//GO:0010739positiveregulationofproteinkinaseAsignaling//GO:0032496responsetolipopolysaccharide//GO:0032760positiveregulationoftumornecrosisfactorproduction//GO:0035733hepaticstellatecellactivation//GO:0043116negativeregula…	GO:0005737cytoplasm//GO:0005829cytosol//GO:0005856cytoskeleton//GO:0005886plasmamembrane//GO:0005925focaladhesion//GO:0005938cellcortex//GO:0043025neuronalcellbody//GO:0098685Schaffercollateral-CA1synapse	GO:0005515proteinbinding//GO:0005516calmodulinbinding//GO:0008179adenylatecyclasebinding//GO:0051018proteinkinaseAbinding	39.5023	5.30386	4.38515e-05	0.00015827	1.44134	0.527407	0.686841	0.7574	27.4067	4.77646	5.60686e-06	1.6254e-05	-5.5868	-0.295168	-4.99915	-7.79371	-3.37989	-0.291459	-0.247301	-0.346745	-4.24805	-3.10062	-7.64879
-1.46697	-1.23202	0.681651	0.0278582	0.481831	-0.614844	1.09311	1.02938	AKAP13	chr15	85380571	85380798	+	20280	A-kinase anchoring protein 13	GO:0006468proteinphosphorylation//GO:0007186Gprotein-coupledreceptorsignalingpathway//GO:0007507heartdevelopment//GO:0035023regulationofRhoproteinsignaltransduction//GO:0035025positiveregulationofRhoproteinsignaltransduction//GO:0035556intracellularsignaltransduction//GO:0043123positiveregulationofI-kappaBkinase/NF-kappaBsignaling//GO:0043406positiveregulationofMAPkinaseactivity//GO:0051056regula…	GO:0005634nucleus//GO:0005829cytosol//GO:0005938cellcortex//GO:0015629actincytoskeleton//GO:0016020membrane//GO:0030864corticalactincytoskeleton//GO:0048471perinuclearregionofcytoplasm	GO:0004691cAMP-dependentproteinkinaseactivity//GO:0005078MAP-kinasescaffoldactivity//GO:0005085guanyl-nucleotideexchangefactoractivity//GO:0005515proteinbinding//GO:0031267smallGTPasebinding//GO:0046872metalionbinding//GO:0051018proteinkinaseAbinding//GO:0060090molecularadaptoractivity	1.20664	0.270997	0.000140709	0.000453886	1.22162	0.288791	8.07039e-05	0.000239547	-1.01241	-0.0177932	0.73756	0.784238	6.12542	6.39548	6.41178	6.10725	6.14358	6.43948	6.33838	6.40858	6.23901	6.5031	6.49324
-1.68507	-1.40731	0.739515	0.943576	-0.00509873	0.386778	0.333233	0.69437	AKAP3	chr12	4615508	4615894	-	3672	A-kinase anchoring protein 3	GO:0001835blastocysthatching//GO:0007178transmembranereceptorproteinserine/threoninekinasesignalingpathway//GO:0007338singlefertilization//GO:0007340acrosomereaction//GO:0008104proteinlocalization	GO:0001669acrosomalvesicle//GO:0005634nucleus//GO:0005737cytoplasm//GO:0035686spermfibroussheath//GO:0097225spermmidpiece//GO:0097228spermprincipalpiece	GO:0005515proteinbinding//GO:0051018proteinkinaseAbinding	1.54122	0.624073	8.25841e-05	0.000280488	1.50721	0.59188	0.000219249	0.0006063	1.02256	0.0321924	0.76722	0.810421	1.39913	2.01396	1.9883	1.35858	1.43968	2.06657	2.12616	1.84914	1.96357	1.94793	2.05339
0.406754	0.103314	-1.1778	-1.31373	-0.892245	1.11027	1.13383	0.6296	AKAP4	chrX	50190777	50191115	-	3027	A-kinase anchoring protein 4	GO:0007165signaltransduction//GO:0007178transmembranereceptorproteinserine/threoninekinasesignalingpathway//GO:0007338singlefertilization//GO:0008104proteinlocalization//GO:0030317flagellatedspermmotility//GO:0044458motileciliumassembly//GO:0045184establishmentofproteinlocalization	GO:0005634nucleus//GO:0005737cytoplasm//GO:0005856cytoskeleton//GO:0005952cAMP-dependentproteinkinasecomplex//GO:0030018Zdisc//GO:0031514motilecilium//GO:0035686spermfibroussheath//GO:0048471perinuclearregionofcytoplasm//GO:0097224spermconnectingpiece//GO:0097225spermmidpiece//GO:0097228spermprincipalpiece//GO:0097229spermendpiece	GO:0005515proteinbinding//GO:0051018proteinkinaseAbinding	-3.17289	-1.6658	0.00022215	0.000684777	1.76824	0.82231	0.00626833	0.0131094	-5.61042	-2.48811	2.52038e-07	8.96707e-07	-0.876819	-2.52796	-0.0376496	-0.695677	-1.05796	-2.58751	-2.7498	-2.24658	0.144268	0.1724	-0.429617
0.230835	-0.238659	1.06193	1.20709	0.893269	-0.89425	-1.40679	-0.853428	AKAP5	chr14	64465499	64465613	+	7512	A-kinase anchoring protein 5	GO:0007165signaltransduction//GO:0007193adenylatecyclase-inhibitingGprotein-coupledreceptorsignalingpathway//GO:0007194negativeregulationofadenylatecyclaseactivity//GO:0007268chemicalsynaptictransmission//GO:0010738regulationofproteinkinaseAsignaling//GO:0045762positiveregulationofadenylatecyclaseactivity//GO:1900273positiveregulationoflong-termsynapticpotentiation//GO:1903078positiveregulationof…	GO:0005829cytosol//GO:0005886plasmamembrane//GO:0009898cytoplasmicsideofplasmamembrane//GO:0014069postsynapticdensity//GO:0032590dendritemembrane//GO:0043197dendriticspine//GO:0045121membraneraft//GO:0060076excitatorysynapse//GO:0098837postsynapticrecyclingendosome	GO:0005515proteinbinding//GO:0005516calmodulinbinding//GO:0008179adenylatecyclasebinding//GO:0017124SH3domainbinding//GO:0030346proteinphosphatase2Bbinding//GO:0031698beta-2adrenergicreceptorbinding//GO:0034237proteinkinaseAregulatorysubunitbinding//GO:0035254glutamatereceptorbinding//GO:0050811GABAreceptorbinding//GO:0051018proteinkinaseAbinding//GO:0060090molecularadaptoractivity//GO:0097110sca…	1.84971	0.887301	6.33897e-05	0.000220311	-1.83077	-0.872447	0.00120322	0.0029139	3.38639	1.75975	1.30397e-08	5.69034e-08	0.336702	1.22016	-0.538044	0.53272	0.140684	1.2267	1.34791	1.08587	-0.406747	-0.834725	-0.372661
-1.59582	-1.03387	0.465162	1.03665	1.12074	-0.744674	0.386838	0.364965	AKAP6	chr14	32329298	32329408	+	19726	A-kinase anchoring protein 6	GO:0001508actionpotential//GO:0006605proteintargeting//GO:0010738regulationofproteinkinaseAsignaling//GO:0010880regulationofreleaseofsequesteredcalciumionintocytosolbysarcoplasmicreticulum//GO:0019933cAMP-mediatedsignaling//GO:0030307positiveregulationofcellgrowth//GO:0051281positiveregulationofreleaseofsequesteredcalciumionintocytosol//GO:0060306regulationofmembranerepolarization//GO:0060316posi…	GO:0005635nuclearenvelope//GO:0005737cytoplasm//GO:0005901caveola//GO:0014701junctionalsarcoplasmicreticulummembrane//GO:0014704intercalateddisc//GO:0016529sarcoplasmicreticulum//GO:0030315T-tubule//GO:0031965nuclearmembrane//GO:0034704calciumchannelcomplex//GO:0048471perinuclearregionofcytoplasm	GO:0005515proteinbinding//GO:0008179adenylatecyclasebinding//GO:0034237proteinkinaseAregulatorysubunitbinding//GO:0043495protein-membraneadaptoractivity//GO:0044325transmembranetransporterbinding//GO:0051018proteinkinaseAbinding//GO:0060090molecularadaptoractivity	2.2672	1.18091	4.54447e-05	0.000163354	1.66384	0.73452	0.00755869	0.0154839	1.36263	0.44639	0.0238249	0.0384722	-0.363774	0.834544	0.357298	-0.517585	-0.209963	0.610636	0.923481	0.969514	-0.0516522	0.56776	0.555786
1.94499	0.6343	0.151618	-0.447965	0.221407	-0.594424	-1.38202	-0.527909	AKAP7	chr6	131135467	131135782	+	4593	A-kinase anchoring protein 7	GO:0008150biological_process//GO:0010738regulationofproteinkinaseAsignaling//GO:0050804modulationofchemicalsynaptictransmission	GO:0005634nucleus//GO:0005829cytosol//GO:0032991protein-containingcomplex//GO:0098686hippocampalmossyfibertoCA3synapse	GO:0000166nucleotidebinding//GO:0005515proteinbinding//GO:0019901proteinkinasebinding//GO:0034237proteinkinaseAregulatorysubunitbinding//GO:0051018proteinkinaseAbinding	-1.16909	-0.225382	0.0080191	0.0173838	-1.28625	-0.363168	0.00020783	0.000577614	1.10022	0.137786	0.0835496	0.119759	3.77406	3.54907	3.41048	3.88621	3.6619	3.5793	3.47668	3.59124	3.45162	3.31683	3.463
0.389413	0.33995	-1.02715	-1.4466	-0.984843	0.658338	1.17233	0.898562	AKAP8	chr19	15353385	15355370	-	6299	A-kinase anchoring protein 8	GO:0000278mitoticcellcycle//GO:0007076mitoticchromosomecondensation//GO:0007165signaltransduction//GO:0015031proteintransport//GO:0031065positiveregulationofhistonedeacetylation//GO:0032720negativeregulationoftumornecrosisfactorproduction//GO:0033127regulationofhistonephosphorylation//GO:0044839cellcycleG2/Mphasetransition//GO:0045087innateimmuneresponse//GO:0071222cellularresponsetolipopolysacch…	GO:0000793condensedchromosome//GO:0001939femalepronucleus//GO:0005634nucleus//GO:0005654nucleoplasm//GO:0005730nucleolus//GO:0005739mitochondrion//GO:0005794Golgiapparatus//GO:0016020membrane//GO:0016363nuclearmatrix	GO:0003690double-strandedDNAbinding//GO:0003723RNAbinding//GO:0005515proteinbinding//GO:0008270zincionbinding//GO:0034237proteinkinaseAregulatorysubunitbinding//GO:0042826histonedeacetylasebinding//GO:0051059NF-kappaBbinding	-1.3963	-0.481604	5.03195e-09	4.62722e-08	1.1278	0.173505	0.00257258	0.00583017	-1.57473	-0.655109	2.34291e-12	1.96568e-11	6.13075	5.64902	6.30377	6.1386	6.1229	5.68893	5.55578	5.70236	6.22396	6.38713	6.30022
-0.63791	-0.903805	-0.69624	-0.872853	-0.274601	0.945029	1.76027	0.680109	AKAP8L	chr19	15380050	15380430	-	8576	A-kinase anchoring protein 8 like	GO:0006397mRNAprocessing//GO:0007076mitoticchromosomecondensation//GO:0008380RNAsplicing//GO:0010793regulationofmRNAexportfromnucleus//GO:0031065positiveregulationofhistonedeacetylation//GO:0033127regulationofhistonephosphorylation//GO:0044839cellcycleG2/Mphasetransition//GO:0045944positiveregulationoftranscriptionbyRNApolymeraseII//GO:0051081nuclearmembranedisassembly	GO:0000785chromatin//GO:0005634nucleus//GO:0005737cytoplasm//GO:0016363nuclearmatrix//GO:0016605PMLbody//GO:0016607nuclearspeck//GO:1990904ribonucleoproteincomplex	GO:0003677DNAbinding//GO:0003723RNAbinding//GO:0005515proteinbinding//GO:0005521laminbinding//GO:0017151DEAD/H-boxRNAhelicasebinding//GO:0034237proteinkinaseAregulatorysubunitbinding//GO:0042826histonedeacetylasebinding//GO:0046872metalionbinding	1.01684	0.0240882	0.65686	0.733141	1.24076	0.311228	7.58297e-06	2.67265e-05	-1.22022	-0.287139	4.51e-06	1.32736e-05	5.51072	5.53642	5.82301	5.53258	5.48886	5.52299	5.49395	5.59232	5.79285	5.92689	5.74929
-0.974238	0.202047	0.16824	-0.974554	-1.40313	0.740301	1.07977	1.16157	AKAP8P1	chr9	11011748	11013096	+	1349	A-kinase anchoring protein 8 pseudogene 1				-1.35173	-0.434806	0.583989	0.669196	4.40187	2.13812	0.0028565	0.00641078	-5.95014	-2.57292	0.000282965	0.00063427	-3.7209	-4.25879	-1.60243	-4.62378	-2.81801	-2.86991	-4.62427	-5.2822	-1.99171	-1.47057	-1.345
-1.06599	-0.63328	0.825495	-0.316979	1.12704	-1.29544	0.0436907	1.31545	AKAP9	chr7	91940840	91941147	+	26515	A-kinase anchoring protein 9	GO:0007020microtubulenucleation//GO:0007165signaltransduction//GO:0007194negativeregulationofadenylatecyclaseactivity//GO:0007268chemicalsynaptictransmission//GO:0031116positiveregulationofmicrotubulepolymerization//GO:0033138positiveregulationofpeptidyl-serinephosphorylation//GO:0034629cellularprotein-containingcomplexlocalization//GO:0051602responsetoelectricalstimulus//GO:0051661maintenanceofc…	GO:0005794Golgiapparatus//GO:0005795Golgistack//GO:0005801cis-Golginetwork//GO:0005813centrosome//GO:0005829cytosol//GO:0005856cytoskeleton//GO:0008076voltage-gatedpotassiumchannelcomplex//GO:0034705potassiumchannelcomplex//GO:0043025neuronalcellbody//GO:0043231intracellularmembrane-boundedorganelle//GO:0044307dendriticbranch//GO:0097060synapticmembrane//GO:0098978glutamatergicsynapse//GO:0099147…	GO:0003677DNAbinding//GO:0005102signalingreceptorbinding//GO:0005515proteinbinding//GO:0015459potassiumchannelregulatoractivity//GO:0034237proteinkinaseAregulatorysubunitbinding//GO:0044325transmembranetransporterbinding//GO:0060090molecularadaptoractivity	1.16506	0.220408	0.00838181	0.0180909	1.10361	0.142228	0.0806139	0.12739	1.05569	0.0781806	0.2656	0.332742	6.33303	6.55373	6.47083	6.2988	6.36727	6.59808	6.41731	6.6458	6.26249	6.47438	6.67561
1.5071	0.419709	1.01967	0.22547	-0.0890599	-0.616668	-1.10546	-1.36076	AKIP1	chr11	8911139	8911223	+	2300	A-kinase interacting protein 1	GO:0034446substrateadhesion-dependentcellspreading//GO:1901222regulationofNIK/NF-kappaBsignaling	GO:0005654nucleoplasm	GO:0005515proteinbinding	-1.03448	-0.0489025	0.400895	0.497251	-1.13383	-0.181208	0.00596824	0.0125354	1.09604	0.132306	0.0223439	0.0362667	4.61535	4.56315	4.43556	4.66444	4.56625	4.62043	4.54871	4.52031	4.47267	4.42853	4.40548
-1.44687	-1.45697	0.771322	1.04484	1.03029	-0.0854124	0.166809	-0.0240183	AKIRIN1	chr1	38991276	38991600	+	2688	akirin 1	GO:0010592positiveregulationoflamellipodiumassembly//GO:0010759positiveregulationofmacrophagechemotaxis//GO:0014839myoblastmigrationinvolvedinskeletalmuscleregeneration//GO:0045663positiveregulationofmyoblastdifferentiation//GO:0045944positiveregulationoftranscriptionbyRNApolymeraseII//GO:1902723negativeregulationofskeletalmusclesatellitecellproliferation//GO:1902725negativeregulationofsatellitec…	GO:0000785chromatin//GO:0005634nucleus//GO:0005654nucleoplasm//GO:0031965nuclearmembrane	GO:0003712transcriptioncoregulatoractivity//GO:0005515proteinbinding	1.37673	0.461246	5.68913e-11	8.94228e-10	1.21694	0.283261	4.30808e-07	1.84735e-06	1.1313	0.177985	3.9506e-05	0.00010085	6.55245	7.01471	6.8357	6.55343	6.55148	6.98053	7.0332	7.03039	6.81557	6.86413	6.82739
-0.765799	-0.717305	1.15658	1.22467	1.2356	-0.81336	-0.632341	-0.688048	AKIRIN2	chr6	87674860	87675607	-	2235	akirin 2	GO:0000122negativeregulationoftranscriptionbyRNApolymeraseII//GO:0008284positiveregulationofcellpopulationproliferation//GO:0009792embryodevelopmentendinginbirthoregghatching//GO:0010629negativeregulationofgeneexpression//GO:0010950positiveregulationofendopeptidaseactivity//GO:0032496responsetolipopolysaccharide//GO:0032755positiveregulationofinterleukin-6production//GO:0045087innateimmunerespons…	GO:0000785chromatin//GO:0005634nucleus//GO:0005654nucleoplasm//GO:0017053transcriptionrepressorcomplex	GO:0003712transcriptioncoregulatoractivity//GO:0005515proteinbinding//GO:0019899enzymebinding//GO:0042802identicalproteinbinding	1.72147	0.783638	2.7794e-14	1.29031e-12	1.00891	0.0127991	0.794071	0.84696	1.70626	0.770839	5.11048e-15	7.49929e-14	5.31853	6.10286	5.33073	5.30876	5.32829	6.08311	6.11053	6.11493	5.2896	5.36252	5.34008
1.6239	1.57103	-0.338246	-0.760916	-0.26308	-0.535552	-0.693846	-0.603291	AKNA	chr9	114334156	114337306	-	10601	AT-hook transcription factor	GO:0001837epithelialtomesenchymaltransition//GO:0021849neuroblastdivisioninsubventricularzone//GO:0045944positiveregulationoftranscriptionbyRNApolymeraseII//GO:0050727regulationofinflammatoryresponse//GO:0060232delamination//GO:0060234neuroblastdelamination	GO:0001650fibrillarcenter//GO:0005654nucleoplasm//GO:0005813centrosome//GO:0005814centriole//GO:0005829cytosol//GO:0005874microtubule//GO:0016020membrane//GO:0043231intracellularmembrane-boundedorganelle	GO:0003677DNAbinding//GO:0005515proteinbinding	-1.83656	-0.877005	7.11311e-12	1.46338e-10	-1.92429	-0.944327	4.96026e-12	4.97325e-11	1.04777	0.0673221	0.351971	0.424204	4.43846	3.56156	3.49453	4.44976	4.42716	3.61107	3.43041	3.6432	3.52674	3.45908	3.49778
-1.52181	-0.475466	0.334046	0.808252	-1.31908	1.16998	0.301702	0.702371	AKNAD1	chr1	108815898	108816302	-	5039	AKNA domain containing 1				1.92728	0.94657	0.138874	0.208026	3.04698	1.60738	0.0132057	0.0256242	-1.58097	-0.660812	0.141106	0.19108	-3.21703	-2.33831	-1.60555	-3.70625	-2.72781	-1.97084	-1.52741	-3.51667	-1.18916	-2.00108	-1.62642
-0.0608843	-0.0594994	-0.82758	-0.88892	-1.34566	1.39289	1.18231	0.607347	AKR1A1	chr1	45550543	45551155	+	3121	aldo-keto reductase family 1 member A1	GO:0006006glucosemetabolicprocess//GO:0006081cellularaldehydemetabolicprocess//GO:0019640glucuronatecatabolicprocesstoxylulose5-phosphate//GO:0019853L-ascorbicacidbiosyntheticprocess//GO:0022900electrontransportchain//GO:0042840D-glucuronatecatabolicprocess//GO:0044597daunorubicinmetabolicprocess//GO:0044598doxorubicinmetabolicprocess//GO:0046185aldehydecatabolicprocess//GO:0110095cellulardetoxif…	GO:0005615extracellularspace//GO:0005829cytosol//GO:0016324apicalplasmamembrane//GO:0045202synapse//GO:0070062extracellularexosome	GO:0004032alditol:NADP+1-oxidoreductaseactivity//GO:0004033aldo-ketoreductase(NADP)activity//GO:0005515proteinbinding//GO:0009055electrontransferactivity//GO:0047655allyl-alcoholdehydrogenaseactivity//GO:0047834D-threo-aldose1-dehydrogenaseactivity//GO:0047939L-glucuronatereductaseactivity//GO:0047941glucuronolactonereductaseactivity//GO:0047956glyceroldehydrogenase[NADP+]activity//GO:1990002meth…	-1.14276	-0.192517	0.0003111	0.000927489	1.16905	0.225342	4.94396e-05	0.000151908	-1.33594	-0.417859	6.70505e-10	3.60933e-09	7.24651	7.05215	7.47334	7.24637	7.24665	7.09123	7.07882	6.9864	7.54053	7.49792	7.38158
1.50875	1.59684	-0.236082	-0.0295491	-0.574835	-0.586721	-0.70888	-0.969523	AKR1B1	chr7	134442356	134442770	-	3654	aldo-keto reductase family 1 member B	GO:0001523retinoidmetabolicprocess//GO:0001894tissuehomeostasis//GO:0002070epithelialcellmaturation//GO:0003091renalwaterhomeostasis//GO:0005975carbohydratemetabolicprocess//GO:0006061sorbitolbiosyntheticprocess//GO:0006693prostaglandinmetabolicprocess//GO:0006700C21-steroidhormonebiosyntheticprocess//GO:0009414responsetowaterdeprivation//GO:0022900electrontransportchain//GO:0031098stress-activat…	GO:0005615extracellularspace//GO:0005654nucleoplasm//GO:0005829cytosol//GO:0032838plasmamembraneboundedcellprojectioncytoplasm//GO:0033010paranodaljunction//GO:0042629mastcellgranule//GO:0043220Schmidt-Lantermanincisure//GO:0048471perinuclearregionofcytoplasm//GO:0070062extracellularexosome//GO:0097454Schwanncellmicrovillus	GO:0001758retinaldehydrogenaseactivity//GO:0004032alditol:NADP+1-oxidoreductaseactivity//GO:0005515proteinbinding//GO:0009055electrontransferactivity//GO:0018505cis-1,2-dihydro-1,2-dihydroxynaphthalenedehydrogenaseactivity//GO:0036130prostaglandinH2endoperoxidasereductaseactivity//GO:0043795glyceraldehydeoxidoreductaseactivity//GO:0047655allyl-alcoholdehydrogenaseactivity//GO:0047834D-threo-aldos…	-1.40035	-0.485788	3.38051e-10	4.2404e-09	-1.53152	-0.614961	6.25203e-12	6.13195e-11	1.09367	0.129173	0.00685026	0.0122801	6.67519	6.18773	6.06144	6.66348	6.68691	6.19945	6.25438	6.10936	6.1062	6.07371	6.0044
-0.105865	0.0011315	-0.888075	-1.09317	-1.1828	1.26171	1.00162	1.00545	AKR1B10	chr7	134527567	134527977	+	1773	aldo-keto reductase family 1 member B10	GO:0001523retinoidmetabolicprocess//GO:0016488farnesolcatabolicprocess//GO:0042572retinolmetabolicprocess//GO:0044597daunorubicinmetabolicprocess//GO:0044598doxorubicinmetabolicprocess//GO:0110095cellulardetoxificationofaldehyde	GO:0005576extracellularregion//GO:0005739mitochondrion//GO:0005764lysosome//GO:0005829cytosol	GO:0001758retinaldehydrogenaseactivity//GO:0004032alditol:NADP+1-oxidoreductaseactivity//GO:0004033aldo-ketoreductase(NADP)activity//GO:0005515proteinbinding//GO:0008106alcoholdehydrogenase(NADP+)activity//GO:0045550geranylgeranylreductaseactivity//GO:0047655allyl-alcoholdehydrogenaseactivity//GO:0047718indanoldehydrogenaseactivity//GO:0047834D-threo-aldose1-dehydrogenaseactivity//GO:0052650NADP-…	-1.47723	-0.562898	1.79641e-08	1.44391e-07	1.56627	0.647336	3.48138e-10	2.48608e-09	-2.31375	-1.21023	4.48304e-16	8.23504e-15	4.6627	4.09302	5.31174	4.63229	4.69311	4.18772	4.07115	4.02021	5.40957	5.26174	5.26392
-0.677429	-1.78221	1.27899	0.672681	0.91692	0.22862	-0.619011	-0.0185622	AKR1C1	chr10	4963253	4963528	+	8765	aldo-keto reductase family 1 member C1	GO:0001523retinoidmetabolicprocess//GO:0006693prostaglandinmetabolicprocess//GO:0006805xenobioticmetabolicprocess//GO:0007586digestion//GO:0008202steroidmetabolicprocess//GO:0008206bileacidmetabolicprocess//GO:0015721bileacidandbilesalttransport//GO:0030299intestinalcholesterolabsorption//GO:0030855epithelialcelldifferentiation//GO:0042448progesteronemetabolicprocess//GO:0042574retinalmetabolicpr…	GO:0005829cytosol//GO:0070062extracellularexosome	GO:0004032alditol:NADP+1-oxidoreductaseactivity//GO:0004033aldo-ketoreductase(NADP)activity//GO:0005515proteinbinding//GO:0016229steroiddehydrogenaseactivity//GO:0016655oxidoreductaseactivity,actingonNAD(P)H,quinoneorsimilarcompoundasacceptor//GO:0018636phenanthrene9,10-monooxygenaseactivity//GO:0030283testosteronedehydrogenase[NAD(P)]activity//GO:0031406carboxylicacidbinding//GO:0032052bileacidb…	1.26183	0.335513	0.000332544	0.000986046	1.1219	0.16595	0.0586379	0.0964152	1.12472	0.169563	0.0260013	0.0416848	3.20757	3.54077	3.37424	3.29176	3.12337	3.58997	3.49755	3.53478	3.42987	3.30067	3.39219
-0.752128	-0.61805	1.88405	1.14373	0.0939969	-0.269526	-0.827018	-0.655059	AKR1C2	chr10	4987775	4990038	-	6086	aldo-keto reductase family 1 member C2	GO:0006693prostaglandinmetabolicprocess//GO:0007186Gprotein-coupledreceptorsignalingpathway//GO:0007586digestion//GO:0008202steroidmetabolicprocess//GO:0008284positiveregulationofcellpopulationproliferation//GO:0030855epithelialcelldifferentiation//GO:0042448progesteronemetabolicprocess//GO:0044597daunorubicinmetabolicprocess//GO:0044598doxorubicinmetabolicprocess//GO:0051897positiveregulationofp…	GO:0005829cytosol	GO:0004032alditol:NADP+1-oxidoreductaseactivity//GO:0016229steroiddehydrogenaseactivity//GO:0016655oxidoreductaseactivity,actingonNAD(P)H,quinoneorsimilarcompoundasacceptor//GO:0018636phenanthrene9,10-monooxygenaseactivity//GO:0031406carboxylicacidbinding//GO:0032052bileacidbinding//GO:004459417-beta-hydroxysteroiddehydrogenase(NAD+)activity//GO:0047023androsteronedehydrogenaseactivity//GO:004704…	1.17678	0.234841	0.0183708	0.0362152	1.00858	0.012322	0.901148	0.926342	1.16677	0.222519	0.0159659	0.0267261	2.68159	2.90579	2.69474	2.67288	2.6903	3.01538	2.91919	2.78281	2.73558	2.66315	2.68549
-0.352797	-0.407437	-0.993558	-0.67254	-1.06155	1.38767	0.972365	1.12785	AKR1C3	chr10	5035354	5035616	+	3911	aldo-keto reductase family 1 member C3	GO:0001523retinoidmetabolicprocess//GO:0006693prostaglandinmetabolicprocess//GO:0007186Gprotein-coupledreceptorsignalingpathway//GO:0007584responsetonutrient//GO:0008202steroidmetabolicprocess//GO:0008284positiveregulationofcellpopulationproliferation//GO:0008584malegonaddevelopment//GO:0009267cellularresponsetostarvation//GO:0010942positiveregulationofcelldeath//GO:0016488farnesolcatabolicproces…	GO:0005634nucleus//GO:0005737cytoplasm//GO:0005829cytosol//GO:0070062extracellularexosome	GO:0001758retinaldehydrogenaseactivity//GO:0004032alditol:NADP+1-oxidoreductaseactivity//GO:0004033aldo-ketoreductase(NADP)activity//GO:0004745NAD-retinoldehydrogenaseactivity//GO:0016229steroiddehydrogenaseactivity//GO:0016655oxidoreductaseactivity,actingonNAD(P)H,quinoneorsimilarcompoundasacceptor//GO:0018636phenanthrene9,10-monooxygenaseactivity//GO:0032052bileacidbinding//GO:0035410dihydrotes…	-1.25623	-0.329096	0.00013488	0.000437002	1.94403	0.95905	1.25622e-12	1.4284e-11	-2.44214	-1.28815	4.33426e-16	8.02271e-15	5.28286	4.95346	6.24333	5.29987	5.26586	4.90096	5.10081	4.85862	6.38343	6.12488	6.22168
-0.536491	0.0521407	-1.69627	-0.53683	-0.404373	0.829947	0.965305	1.32657	AKR1C4	chr10	5195462	5195575	+	1914	aldo-keto reductase family 1 member C4	GO:0001523retinoidmetabolicprocess//GO:0006693prostaglandinmetabolicprocess//GO:0006699bileacidbiosyntheticprocess//GO:0008202steroidmetabolicprocess//GO:0008209androgenmetabolicprocess//GO:0015721bileacidandbilesalttransport//GO:0022900electrontransportchain//GO:0042448progesteronemetabolicprocess//GO:0044597daunorubicinmetabolicprocess//GO:0044598doxorubicinmetabolicprocess//GO:0071395cellularr…	GO:0005737cytoplasm//GO:0005829cytosol//GO:0070062extracellularexosome	GO:0001758retinaldehydrogenaseactivity//GO:0004032alditol:NADP+1-oxidoreductaseactivity//GO:0004033aldo-ketoreductase(NADP)activity//GO:0009055electrontransferactivity//GO:0015125bileacidtransmembranetransporteractivity//GO:0016229steroiddehydrogenaseactivity//GO:0016655oxidoreductaseactivity,actingonNAD(P)H,quinoneorsimilarcompoundasacceptor//GO:0032052bileacidbinding//GO:0035410dihydrotestoster…	-1.98153	-0.986614	0.196666	0.27757	3.63367	1.86143	0.00443122	0.00956503	-7.20022	-2.84804	8.33998e-05	0.000202872	-3.67096	-4.58496	-1.8303	-4.09327	-3.24864	-5.75743	-4.09376	-3.90369	-2.13257	-1.93835	-1.41997
-1.40767	0.268502	-0.00795639	-1.40833	0.900924	-0.0656847	1.43776	0.282462	AKR1C7P	chr10	5275173	5275237	-	1833	aldo-keto reductase family 1 member C7, pseudogene				1.20971	0.274662	0.624289	0.70421	1.77019	0.823906	0.141836	0.207248	-1.46332	-0.549244	0.233684	0.297329	-2.65722	-2.36629	-1.83731	-3.27015	-2.04429	-2.24647	-3.27063	-1.58177	-2.28869	-1.18916	-2.03408
0.128714	-0.0379796	-0.14589	-1.47817	-1.33383	1.00691	1.28542	0.574824	AKR1D1	chr7	138002324	138002390	+	3412	aldo-keto reductase family 1 member D1	GO:0006699bileacidbiosyntheticprocess//GO:0006707cholesterolcatabolicprocess//GO:0007586digestion//GO:0008202steroidmetabolicprocess//GO:0008207C21-steroidhormonemetabolicprocess//GO:0008209androgenmetabolicprocess//GO:0030573bileacidcatabolicprocess	GO:0005829cytosol	GO:0004032alditol:NADP+1-oxidoreductaseactivity//GO:0004033aldo-ketoreductase(NADP)activity//GO:0005496steroidbinding//GO:0016229steroiddehydrogenaseactivity//GO:0047086ketosteroidmonooxygenaseactivity//GO:0047787delta4-3-oxosteroid5beta-reductaseactivity//GO:0047834D-threo-aldose1-dehydrogenaseactivity	-2.44319	-1.28877	0.0485858	0.085353	2.26549	1.17982	0.0200784	0.0373877	-5.53502	-2.46859	0.000117531	0.00027916	-2.61806	-3.97613	-1.4193	-2.50831	-2.72781	-2.86991	-4.62427	-4.43421	-1.35189	-0.985141	-1.92086
0.765821	1.39279	0.684181	-0.0258884	0.447311	-1.45727	-1.05939	-0.747561	AKR1E2	chr10	4786629	4786760	+	2417	aldo-keto reductase family 1 member E2		GO:0005829cytosol	GO:0004032alditol:NADP+1-oxidoreductaseactivity//GO:0016491oxidoreductaseactivity//GO:0047834D-threo-aldose1-dehydrogenaseactivity//GO:00505711,5-anhydro-D-fructosereductaseactivity	-1.38773	-0.472731	0.0257701	0.0488209	-2.76425	-1.46689	6.11007e-06	2.19082e-05	1.99191	0.994155	0.000477421	0.00103306	0.653975	0.168623	-0.826021	0.43991	0.868039	0.384162	-0.100708	0.222416	-1.07812	-0.806436	-0.593503
[truncated: 22,501 more rows]

## Sheet: EPZ.vs.Control
CT_2.scaled	CT_3.scaled	EPZ_1.scaled	EPZ_2.scaled	EPZ_3.scaled	IC_1.scaled	IC_2.scaled	IC_3.scaled	Geneid	Chr	Start	End	Strand	Length	Description	GO.BP	GO.CC	GO.MF	FC.EPZ.vs.Control	logFC.EPZ.vs.Control	P.Value.EPZ.vs.Control	adj.P.Val.EPZ.vs.Control	FC.IC.vs.Control	logFC.IC.vs.Control	P.Value.IC.vs.Control	adj.P.Val.IC.vs.Control	FC.EPZ.vs.IC	logFC.EPZ.vs.IC	P.Value.EPZ.vs.IC	adj.P.Val.EPZ.vs.IC	mean.Control	mean.EPZ	mean.IC	CT_2	CT_3	EPZ_1	EPZ_2	EPZ_3	IC_1	IC_2	IC_3
[truncated: 3,344 more rows]

## Sheet: IC.vs.Control
CT_2.scaled	CT_3.scaled	EPZ_1.scaled	EPZ_2.scaled	EPZ_3.scaled	IC_1.scaled	IC_2.scaled	IC_3.scaled	Geneid	Chr	Start	End	Strand	Length	Description	GO.BP	GO.CC	GO.MF	FC.EPZ.vs.Control	logFC.EPZ.vs.Control	P.Value.EPZ.vs.Control	adj.P.Val.EPZ.vs.Control	FC.IC.vs.Control	logFC.IC.vs.Control	P.Value.IC.vs.Control	adj.P.Val.IC.vs.Control	FC.EPZ.vs.IC	logFC.EPZ.vs.IC	P.Value.EPZ.vs.IC	adj.P.Val.EPZ.vs.IC	mean.Control	mean.EPZ	mean.IC	CT_2	CT_3	EPZ_1	EPZ_2	EPZ_3	IC_1	IC_2	IC_3
[truncated: 4,297 more rows]

[truncated: 2 more sheets: EPZ.vs.IC, Legend]
