# Supplementary material
Source: Research Square preprint supplement (doi:10.21203/rs.3.rs-9151067/v1)
Supplement: Supplementary file 6 [file ecc49c53f13ca4db101ddcbb.xlsx]

## Sheet: SUZ12_targets
SUZ12_targets
TRIL
COL12A1
ADARB1
BACH2
GPR176
SOX17
ZMIZ1
EVA1C
CYP1B1
PXDC1
VSTM4
BVES
IER5
PRIMA1
PRKCH
UNC5B
PRKCB
CACNA2D1
CACNA2D3
UNC5C
SOX11
DKK1
DKK2
CPED1
CH25H
EID1
AR
CLDN5
ISL2
DAAM2
HECW2
HOXB4
PRR16
HOXB2
PRKD1
HS3ST3A1
GATA3
THY1
CHST11
CHST15
PLCG2
HOXC4
ST3GAL6
HOXC9
ST3GAL1
HOXC6
FZD1
FZD2
FZD4
PBX3
NR2F2
FLI1
FOSL2
GJB2
CPEB1
GIPC3
SNAI2
HOXD9
HOXD8
CDKN1C
BHLHE41
TCF21
PTH1R
PEAR1
RCSD1
ARHGAP6
HOXC10
MRC2
SHE
MMP28
RSPO3
DUSP4
KCND2
ELOVL4
KCND3
SPHK1
DUSP7
ITPKB
ZEB2
GPRC5B
KCNMA1
CDC42EP3
GAS1
PLEKHO1
CHST2
MDFI
GRAMD1B
GRP
FAXC
PELI2
TMEM163
SLC7A2
FLNC
JAM3
CDKN2A
IL10RA
BMP8A
SAMD4A
HEYL
TMEM158
CRLF1
NRROS
CSF1
PLXND1
IRS1
NAB1
RORA
FGF2
CXCL16
LAMP5
CDH6
PLXNC1
CSGALNACT1
COL27A1
IGFBP5
IGFBP4
FST
IGFBP3
TPM1
FRMD4B
VASH1
HIC1
FOXP2
RAB31
MAF
PGR
ROR1
PHLDB2
KANK4
SHC4
TACSTD2
GLIS3
CHRD
AEBP1
AK5
RHOBTB1
ITPRIPL2
SNN
ATXN1
NDN
NPTX1
IGFBP6
PLXNA4
KL
OSBPL6
FBXO32
PTPRE
CXCL12
MAFB
UST
ITGA11
LHX6
ESAM
HPSE
CNIH3
MOXD1
CNTNAP1
FLT1
EIF4E3
COL14A1
RASGRF2
DYSF
ADAMTS5
THBD
ADAMTS2
LBH
ADAMTS3
ADAMTS1
BOC
EMILIN2
EFHD1
EDIL3
PRKG1
EMX2
TRPC6
TRPC1
DUSP26
NRG3
HAND1
ITGA7
COL15A1
NLGN1
SMARCD3
ZBTB46
ATP10A
LRRC8C
JAZF1
KCNJ8
PRRX1
PCDH7
PLCL2
KIAA1549L
TM6SF1
BICC1
ENOX1
NIN
FRAS1
GLRB
MAB21L2
TLL1
PIK3AP1
KCNK2
SPON1
THSD7B
ANTXR2
ANTXR1
RASSF2
RASSF5
KDR
SOX8
SOX7
LIMCH1
EBF1
EBF2
EBF4
SFRP1
SFRP2
PAPPA
ZFPM2
TRIB2
EPHA3
TSHZ3
EPAS1
RRAD
TWIST1
TMTC1
PCDH17
ST8SIA4
ARSI
HIVEP3
TSPAN2
HIVEP2
CD14
NTSR1
GPM6B
EGR2
EGR3
FOXF2
FAM78A
FOXF1
STAC
PARVA
ID4
TMCC3
SPATS2L
RGL1
FBXL7
NRP1
NRP2
SYNM
TENM4
PTPRM
SLC35F1
MEOX2
CHRDL2
PPP3CC
ZHX2
NOG
GFRA1
OSMR
SORCS2
PARP8
RGMA
MN1
RHOJ
FJX1
PDZRN3
FOXC2
POPDC3
FOXC1
RAMP2
PTGER3
AMIGO2
NEXN
CXCR4
PRICKLE1
GNAI1
NT5E
RELN
EGFLAM
NFIL3
CREG2
CILP2
GPC6
CORIN
CA11
RFTN1
LHFPL2
PODN
SH3RF3
KIF26B
FAM171B
APBA2
CD83
PRDM6
LOXL1
COMP
RGS2
SVEP1
PPFIA2
PDGFRA
OSR2
SCARA3
OSR1
TMOD2
LMO2
SLC30A4
KCTD1
SHISA3
SHISA2
GEM
LOX
COL4A2
DOK5
COL4A1
DOK6
ADAM12
ODF3B
FBLN7
NPR2
NTM
HTRA4
NPR3
HTRA1
LTBP2
BHLHE22
EFNA5
SCUBE2
PODXL
MSC
WNT2
CNTLN
PRPH
TGFB2
TGFB1
CAV1
ZFHX4
BMP6
GNAO1
NR4A2
ARHGAP31
BMP1
NR4A3
TRPV4
CNTN4
FBN1
COLGALT2
DOCK8
TNFAIP2
SOBP
RERG
SCARF2
HS3ST3B1
TBC1D9
MMP9
TGFBR1
TGFBR2
GREM1
TGFBR3
ALDH1A3
TBC1D1
ARHGAP10
VCAN
LATS2
CDH11
CDH13
IRF5
PDE5A
SCN4B
COLEC12
RGS17
LEF1
PTHLH
PDLIM2
CLMP
CHSY1
HLX
TBX21
SPOCK1
NRIP3
SLIT3
CHSY3
SLIT2
NEGR1
EYA4
LGI2
PDE4DIP
CCK
SGPP1
HS3ST2
MEIS1
PDE10A
DES
BCL6B
PMP22
RGS10
PTX3
RBM43

## Sheet: MYC_targets
MYC_targets
ATF1
PGAP2
TFRC
POP1
TMEM97
ALKBH2
COMTD1
XYLB
SECISBP2
DNTTIP2
SND1
DDX39A
MTHFD1
CLNS1A
MRPL18
MEPCE
CDCA8
MRPL17
MRPL15
MRPL12
MRPL20
GRPEL2
PPARGC1B
ATG5
TOE1
MTERF3
PMM2
ERLIN1
MRPL27
MRPL24
CS
FASN
NAPEPLD
SFXN4
PSMG4
PSMG1
LRSAM1
PIGW
ATIC
ENOPH1
ZNF485
NSUN4
NSUN5
RMI1
SPHK2
NSUN2
MRPL48
MRPL45
PSMA5
MBLAC2
PTRH2
CKS2
TRUB2
NIP7
ODC1
NOC4L
MIEF1
SDAD1
SLC7A1
PET117
TMEM69
NRAS
TCOF1
TMEM68
SRSF10
PMS1
UTP6
TRMT10C
USP9X
UTP3
NOC3L
BYSL
LYRM4
APEX1
SERBP1
GID8
UBAP2
CRCP
CSE1L
GOLIM4
TSEN2
RUVBL1
SLC25A40
PMPCA
MTPAP
ZNF202
SLC38A1
ANAPC7
EIF1AX
MRTO4
MAPKAPK5
ANAPC5
SRSF6
SRSF7
KPNB1
KHDRBS1
SMYD5
MAZ
G3BP1
BRIX1
NOP14
NOP16
SRD5A1
EEF2
UCKL1
YRDC
GNL3L
G6PC3
NACA
OGT
MIPEP
NXT1
RMND1
MRPL4
MRPL3
NADK2
MRPL1
TRIM65
EIF5B
RAD23A
RABGGTB
QTRT1
DBF4
BIRC5
ETF1
SLC25A10
TOP1
DCTPP1
DTL
FXN
SLC25A6
GTF3C2
HM13
SRSF1
MAK16
U2AF2
KRIT1
PCBD2
HNRNPA1
E2F5
NOP58
METAP1D
HNRNPA3
MMAB
IMMT
HNRNPAB
MYO19
DHODH
EIF3M
EIF3K
EIF3J
PDCD2
EIF3D
EIF3B
LTV1
THUMPD2
TXNDC12
NUDT5
ZDHHC3
PPAT
FBXO5
EIF2A
SLC12A9
SMARCC1
RSAD1
ALG3
IMP4
BCS1L
CFDP1
PPA1
CCDC86
ZMPSTE24
MBTD1
DHX34
SURF6
LYAR
SNX5
PAICS
AIMP2
ARMC10
NDUFAF4
NDUFAF2
NOL10
INTS7
NOL11
SUV39H2
DHRS13
USPL1
MRPS16
HIBADH
PAK1IP1
NAT10
BRCA2
AATF
SYNCRIP
IMMP2L
ARV1
NUDCD2
DHX15
UTP14A
CCT3
CCT2
MRPS27
MRPS25
ACAD9
PRPF40A
CACYBP
TFB2M
APRT
KIF2A
UFC1
TLCD1
PABPC1
EEF1E1
PTMA
MRPS35
MRPS33
MRPS34
GPALPP1
EXOSC7
EXOSC5
SCAND1
CCT8
CCT7
EXOSC2
CCT5
NPM1
SPRYD4
PEX10
NLE1
TFAP4
CMSS1
HNRNPA2B1
MAD2L1
DCLRE1B
DPAGT1
BUB1B
CELSR3
BORA
DIMT1
CAMKMT
PPIF
GEMIN4
GEMIN5
PPIH
GEMIN8
PPID
UBIAD1
COX18
DDX1
SLC1A5
RPF2
CCNB1
PIBF1
COX10
NUP155
RPP40
TIMM44
AP4B1
HIGD2A
RCL1
CYCS
STT3B
RBM28
RBM26
DNPH1
TTC27
GPHN
LMNB1
TIMM17A
UTP15
RBM15
NCBP1
NCBP2
DDX55
DDX56
ABHD14B
DDX51
UTP18
SFPQ
NDUFS1
AGPAT5
DDX28
CLCN2
AURKA
MAT2A
TRA2B
TGS1
POLD2
NAA25
TIMM8A
TTC13
RRM2
DDX31
U2SURP
WARS2
RPIA
POLE3
NUP35
NAA15
SUGT1
RAN
RPL3
RRP1
ARPC5L
HNRNPU
GPATCH4
DCAF4
PHB2
RPL9
RPL6
RRP9
CLP1
CEP95
RPL37
RPL39
EARS2
MECR
DDX11
WDR75
GTPBP4
ARMC6
HMBS
RPL24
RPL29
DUS3L
ANAPC13
NUP205
SEH1L
NOLC1
BLOC1S3
GAR1
PNPO
RRS1
NUP88
SLC19A1
SLC19A2
BTF3
IRF2BP2
PA2G4
PAFAH2
HNRNPK
HNRNPF
HNRNPD
CEP83
FARSA
DANCR
FARSB
SETD6
ADK
WDR43
TMEM186
ING5
MCEE
RIOK2
RIOK1
RRP12
RRP15
NDC1
ZNF121
TIGD5
WDR36
CLUH
GNL2
KAT2A
RCCD1
GART
CDC123
SF3B3
TIMM9
RPL11
TIMM13
TM9SF4
RPL14
RPS3
RPL15
RPS2
RPL18
TRMT1
GTF2H1
RRP1B
GTF2H3
TUBB4B
WDR12
LRPPRC
MZT1
SCAF4
ADAT2
ZNF33B
UBP1
BZW2
IPO7
IPO4
MACROD1
PAPOLA
SLC39A8
RNF44
RPS7
RPS8
RPS5
RPS6
IPMK
GTF3A
THNSL1
NCL
NHP2
PGP
SNRPF
ADNP
SNRPC
SNRPA
AK2
HMMR
ZNF787
ANKRD28
EIF2B5
COA4
CD164
EIF2B3
RITA1
LSM7
CDK4
RSL24D1
ZNF771
MCM7
MCM8
WDR3
WDR4
UFSP1
PTBP1
NOB1
EIF2B1
COA7
PAAF1
ADSL
RFC4
DIS3
YDJC
REXO4
TSN
DNAJC2
POLR1A
POLR1B
POLR1C
MCM3
MCM4
POLR1E
SNRPA1
LCORL
HDAC2
NUFIP1
MRM1
TMA16
REPIN1
DCAF17
POLR2H
POLR2I
MGME1
PPIL1
RAD50
POLR3B
IMPDH2
DNAJA3
CEBPZ
POLR3K
METAP1
TRMT61B
METAP2
TCERG1
CISD1
RPS14
FRAT2
LONP1
ARL6IP6
COG8
METTL1
IFRD2
PDE12
GRWD1
GUF1
TFAM
VDAC2
DNA2
ANKRA2
TELO2
CSTF3
LIAS
SCFD2
DPH2
CSTF1
DPH5
SCAP
DPH6
TRAP1
PYCR1
SNHG4
UBAC2
CCT6A
ZZZ3
ADCK1
ADCK5
MPHOSPH10
RNPS1
ANP32B
RPS24
CD320
ATR
DAZAP1
GFM1
FAF1
OLA1
LIMD1
COIL
HINT1
XPO1
XPO4
C1QBP
XPO5
PRMT1
PRMT3
UCHL3
UCHL5
NME1
RPUSD4
NME6
POC5
RPUSD2
HNRNPH3
MRRF
DTYMK
NOL7
NOL8
ZNF3
AKAP1
PBLD
HIRA
METTL5
METTL8
RANBP1
PTGES3
RSL1D1
NR6A1
XPOT
TRIP13
KDM1A
SPPL2B
TOMM20
EFTUD2
CHCHD4
FBL
FAM162A
NARS2
PSPH
NOM1
PUS1
ANGEL1
TOMM34
ALG13
LIG3
TRNT1
PUS7
TRPC4AP
KCTD5
PREPL
PRPF6
RPL7L1
ZCCHC7
EMG1
HSPA9
CPSF4
PNPT1
CBX3
DNAJC11
NMRAL1
TSGA10
EIF2S3
YBX1
RABEPK
RBM3
MARS2
URB2
SAFB
SUPV3L1
TRAPPC6A
LUC7L3
THOP1
MTIF2
TBRG4
HSPD1
PDSS1
PTCD3
PTCD2
KDM4C
NIFK
HSPE1
SSBP1
PAXBP1
ABCE1
ARL6IP1
RPL8
NUBP2
LSM12
RPS6KA1
DUS4L
MRPS18B
JTB
SRFBP1
TRIB3
KIF20A
URI1
SET
SHMT2
CDCA5
CDCA7
PLA2G6
AAAS
PPCS
ZNF704
DPH7
ZBED4
MRPL23
TBL2
SASS6
CEP57
FASTKD2
CCDC125
ZNF367
MRPS28
PRMT7
LSG1
KIF2C
UMPS
PCNA
MRPL57
BCLAF1
RAE1
SUZ12
TRMT10A
GATB
LYRM7
RTN4IP1
CCNT2
PRDM4
TXN2
RDM1
ZNF566
KPNA2
PUS3
RPS9
SLX4IP
RPP25L
POLG2
SLC9A8
HSPBP1
TIMM50
ORC5
THEM6
GOT2
LSM4
GCLC
NASP
HOOK2
RAD9A
KCNK5
ZC3H8
CKS1B
MYBL2
TFDP1
POLR1D
NDUFB5
USP10
FOXRED1
MLLT6
DROSHA
TMEM209
RPP14
MMAA
KRR1
WEE1
SLC25A39
KLF5
SLC25A36
SSBP4
